# Supplementary material for: Endothelial OX40 activation facilitates tumor cell escape from T cell surveillance through S1P/YAP-mediated angiogenesis
Source: J Clin Invest. 2025 Mar 3;135(5):e186291. doi: 10.1172/JCI186291 (PMC11870743; doi:10.1172/JCI186291)
Supplement: Supplemental table 2 [file jci-135-186291-s064.xlsx]

## Sheet: OX40L vs. PBS Cyto
Supplementary Table S2. Differences in cytoplasmic and nuclear proteins in HUVEC treated with PBS or OX40L recombinant protein
Protein	Protein Name	Gene Name	Function	ProteinGroup	FastaHeaders	Proteins	Peptides	RazorUniquePeptides	UniquePeptides	Coverage	MolWeight	LFQ intensity OX40L_Cyto	LFQ intensity PBS_Cyto	Cyto_OX40L/Cyto_PBS
Q9UBP9	PTB domain-containing engulfment adapter protein 1	GULP1	FUNCTION: May function as an adapter protein. Required for efficient phagocytosis of apoptotic cells. Modulates cellular glycosphingolipid and cholesterol transport. May play a role in the internalization and endosomal trafficking of various LRP1 ligands, such as PSAP. Increases cellular levels of GTP-bound ARF6. {ECO:0000269|PubMed:10574763, ECO:0000269|PubMed:10574771, ECO:0000269|PubMed:164976…	sp|Q9UBP9|GULP1_HUMAN	sp|Q9UBP9|GULP1_HUMAN PTB domain-containing engulfment adapter protein 1 OS=Homo sapiens OX=9606 GN=GULP1 PE=1 SV=1	1	2	2	2	9.2	34.49	23755000	87728	270.78
Q96ND0	Protein FAM210A	FAM210A	FUNCTION: May play a role in the structure and strength of both muscle and bone. {ECO:0000250|UniProtKB:Q8BGY7}.	sp|Q96ND0|F210A_HUMAN	sp|Q96ND0|F210A_HUMAN Protein FAM210A OS=Homo sapiens OX=9606 GN=FAM210A PE=1 SV=2	1	2	2	2	9.9	30.776	459490	2762.4	166.337
Q8TBK6	Zinc finger CCHC domain-containing protein 10	ZCCHC10		sp|Q8TBK6|ZCH10_HUMAN	sp|Q8TBK6|ZCH10_HUMAN Zinc finger CCHC domain-containing protein 10 OS=Homo sapiens OX=9606 GN=ZCCHC10 PE=1 SV=1	1	1	1	1	7.3	20.966	159080	1402.8	113.402
O15287	Fanconi anemia group G protein	FANCG	FUNCTION: DNA repair protein that may operate in a postreplication repair or a cell cycle checkpoint function. May be implicated in interstrand DNA cross-link repair and in the maintenance of normal chromosome stability. Candidate tumor suppressor gene.	sp|O15287|FANCG_HUMAN	sp|O15287|FANCG_HUMAN Fanconi anemia group G protein OS=Homo sapiens OX=9606 GN=FANCG PE=1 SV=1	1	3	3	3	7.1	68.553	145750	2473.5	58.9246
P12883	Myosin-7	MYH7	FUNCTION: Myosins are actin-based motor molecules with ATPase activity essential for muscle contraction. Forms regular bipolar thick filaments that, together with actin thin filaments, constitute the fundamental contractile unit of skeletal and cardiac muscle. {ECO:0000305|PubMed:26150528, ECO:0000305|PubMed:26246073}.	sp|P12883|MYH7_HUMAN;sp|P12882|MYH1_HUMAN;sp|Q9UKX2|MYH2_HUMAN;sp|P13535|MYH8_HUMAN;sp|P11055|MYH3_HUMAN;sp|Q9UKX3|MYH13_HUMAN;sp|A7E2Y1|MYH7B_HUMAN	sp|P12883|MYH7_HUMAN Myosin-7 OS=Homo sapiens OX=9606 GN=MYH7 PE=1 SV=5	7	29	4	4	17.6	223.09	469140	9647.7	48.6271
Q9Y3R5	Protein dopey-2	DOP1B	FUNCTION: May be involved in protein traffic between late Golgi and early endosomes. {ECO:0000250|UniProtKB:Q03921}.	sp|Q9Y3R5|DOP2_HUMAN	sp|Q9Y3R5|DOP2_HUMAN Protein dopey-2 OS=Homo sapiens OX=9606 GN=DOP1B PE=1 SV=5	1	2	2	2	1	258.23	1824500	41445	44.0222
A0A2R8Y4L2	Heterogeneous nuclear ribonucleoprotein A1-like 3	HNRNPA1L3		sp|A0A2R8Y4L2|RA1L3_HUMAN	sp|A0A2R8Y4L2|RA1L3_HUMAN Heterogeneous nuclear ribonucleoprotein A1-like 3 OS=Homo sapiens OX=9606 GN=HNRNPA1L3 PE=4 SV=1	1	15	1	1	57.8	29.173	12467000	317900	39.2167
P20336	Ras-related protein Rab-3A	RAB3A	FUNCTION: Small GTP-binding protein that plays a central role in regulated exocytosis and secretion. Controls the recruitment, tethering and docking of secretory vesicles to the plasma membrane (By similarity). Upon stimulation, switches to its active GTP-bound form, cycles to vesicles and recruits effectors such as RIMS1, RIMS2, Rabphilin-3A/RPH3A, RPH3AL or SYTL4 to help the docking of vesicule…	sp|P20336|RAB3A_HUMAN	sp|P20336|RAB3A_HUMAN Ras-related protein Rab-3A OS=Homo sapiens OX=9606 GN=RAB3A PE=1 SV=1	1	2	2	2	14.1	24.984	251460	7160.9	35.1157
Q14331	Protein FRG1	FRG1	FUNCTION: Binds to mRNA in a sequence-independent manner. May play a role in regulation of pre-mRNA splicing or in the assembly of rRNA into ribosomal subunits. May be involved in mRNA transport. May be involved in epigenetic regulation of muscle differentiation through regulation of activity of the histone-lysine N-methyltransferase KMT5B. {ECO:0000269|PubMed:11991638, ECO:0000269|PubMed:1506012…	sp|Q14331|FRG1_HUMAN	sp|Q14331|FRG1_HUMAN Protein FRG1 OS=Homo sapiens OX=9606 GN=FRG1 PE=1 SV=1	1	4	4	4	19.8	29.172	281190	8705.5	32.3003
Q6QNY1	Biogenesis of lysosome-related organelles complex 1 subunit 2	BLOC1S2	FUNCTION: Component of the BLOC-1 complex, a complex that is required for normal biogenesis of lysosome-related organelles (LRO), such as platelet dense granules and melanosomes (PubMed:15102850, PubMed:17182842). In concert with the AP-3 complex, the BLOC-1 complex is required to target membrane protein cargos into vesicles assembled at cell bodies for delivery into neurites and nerve terminals.…	sp|Q6QNY1|BL1S2_HUMAN	sp|Q6QNY1|BL1S2_HUMAN Biogenesis of lysosome-related organelles complex 1 subunit 2 OS=Homo sapiens OX=9606 GN=BLOC1S2 PE=1 SV=1	1	1	1	1	12	15.961	219260	8289.7	26.4497
P04062	Lysosomal acid glucosylceramidase	GBA1	FUNCTION: Glucosylceramidase that catalyzes, within the lysosomal compartment, the hydrolysis of glucosylceramide/GlcCer into free ceramide and glucose (PubMed:9201993, PubMed:24211208). Thereby, plays a central role in the degradation of complex lipids and the turnover of cellular membranes (PubMed:27378698). Through the production of ceramides, participates in the PKC-activated salvage pathway …	sp|P04062|GBA1_HUMAN	sp|P04062|GBA1_HUMAN Lysosomal acid glucosylceramidase OS=Homo sapiens OX=9606 GN=GBA1 PE=1 SV=3	1	8	8	8	19	59.716	4520400	185200	24.4082
Q9UFN0	Protein NipSnap homolog 3A	NIPSNAP3A		sp|Q9UFN0|NPS3A_HUMAN;sp|Q9BS92|NPS3B_HUMAN	sp|Q9UFN0|NPS3A_HUMAN Protein NipSnap homolog 3A OS=Homo sapiens OX=9606 GN=NIPSNAP3A PE=1 SV=2	2	10	10	10	47.4	28.466	7160500	344020	20.8142
Q9BWH2	FUN14 domain-containing protein 2	FUNDC2		sp|Q9BWH2|FUND2_HUMAN	sp|Q9BWH2|FUND2_HUMAN FUN14 domain-containing protein 2 OS=Homo sapiens OX=9606 GN=FUNDC2 PE=1 SV=2	1	4	4	4	18.5	20.675	1037000	55648	18.635
Q16878	Cysteine dioxygenase type 1	CDO1	FUNCTION: Initiates several important metabolic pathways related to pyruvate and several sulfurate compounds including sulfate, hypotaurine and taurine. Critical regulator of cellular cysteine concentrations. Has an important role in maintaining the hepatic concentation of intracellular free cysteine within a proper narrow range.	sp|Q16878|CDO1_HUMAN	sp|Q16878|CDO1_HUMAN Cysteine dioxygenase type 1 OS=Homo sapiens OX=9606 GN=CDO1 PE=1 SV=2	1	1	1	1	7.5	22.972	30942	1745.2	17.7298
Q9Y605	MORF4 family-associated protein 1	MRFAP1		sp|Q9Y605|MOFA1_HUMAN	sp|Q9Y605|MOFA1_HUMAN MORF4 family-associated protein 1 OS=Homo sapiens OX=9606 GN=MRFAP1 PE=1 SV=1	1	2	2	2	26.8	14.649	151680	9700.4	15.6365
Q9NYI0	PH and SEC7 domain-containing protein 3	PSD3	FUNCTION: Guanine nucleotide exchange factor for ARF6. {ECO:0000250}.	sp|Q9NYI0|PSD3_HUMAN	sp|Q9NYI0|PSD3_HUMAN PH and SEC7 domain-containing protein 3 OS=Homo sapiens OX=9606 GN=PSD3 PE=1 SV=2	1	2	2	2	3.6	116.03	79029	5223.7	15.1289
Q96S19	Methyltransferase-like 26	METTL26		sp|Q96S19|MTL26_HUMAN	sp|Q96S19|MTL26_HUMAN Methyltransferase-like 26 OS=Homo sapiens OX=9606 GN=METTL26 PE=1 SV=2	1	1	1	1	8.3	22.578	81920	5441	15.0561
Q96LT9	RNA-binding region-containing protein 3	RNPC3	FUNCTION: Participates in pre-mRNA U12-dependent splicing, performed by the minor spliceosome which removes U12-type introns. U12-type introns comprises less than 1% of all non-coding sequences. Binds to the 3'-stem-loop of m(7)G-capped U12 snRNA. {ECO:0000269|PubMed:16096647, ECO:0000269|PubMed:19447915, ECO:0000269|PubMed:24480542, ECO:0000269|PubMed:29255062}.	sp|Q96LT9|RNPC3_HUMAN	sp|Q96LT9|RNPC3_HUMAN RNA-binding region-containing protein 3 OS=Homo sapiens OX=9606 GN=RNPC3 PE=1 SV=1	1	2	2	2	4.3	58.574	133190	8973.7	14.8423
O95619	YEATS domain-containing protein 4	YEATS4	FUNCTION: Chromatin reader component of the NuA4 histone acetyltransferase (HAT) complex, a complex involved in transcriptional activation of select genes principally by acetylation of nucleosomal histones H4 and H2A (PubMed:12963728, PubMed:14966270). Specifically recognizes and binds acylated histone H3, with a preference for histone H3 diacetylated at 'Lys-18' and 'Lys-27' (H3K18ac and H3K27ac…	sp|O95619|YETS4_HUMAN	sp|O95619|YETS4_HUMAN YEATS domain-containing protein 4 OS=Homo sapiens OX=9606 GN=YEATS4 PE=1 SV=1	1	1	1	1	4.8	26.499	75479	5901.5	12.7898
Q96EP9	Sodium/bile acid cotransporter 4	SLC10A4	FUNCTION: Transporter for bile acids. {ECO:0000269|PubMed:23589386}.	sp|Q96EP9|NTCP4_HUMAN	sp|Q96EP9|NTCP4_HUMAN Sodium/bile acid cotransporter 4 OS=Homo sapiens OX=9606 GN=SLC10A4 PE=1 SV=2	1	1	1	1	4.3	46.503	38925	3044.7	12.7845
P33121	Long-chain-fatty-acid--CoA ligase 1	ACSL1	FUNCTION: Catalyzes the conversion of long-chain fatty acids to their active form acyl-CoAs for both synthesis of cellular lipids, and degradation via beta-oxidation (PubMed:24269233, PubMed:22633490). Preferentially uses palmitoleate, oleate and linoleate (PubMed:24269233). Preferentially activates arachidonate than epoxyeicosatrienoic acids (EETs) or hydroxyeicosatrienoic acids (HETEs) (By simi…	sp|P33121|ACSL1_HUMAN	sp|P33121|ACSL1_HUMAN Long-chain-fatty-acid--CoA ligase 1 OS=Homo sapiens OX=9606 GN=ACSL1 PE=1 SV=1	1	10	10	10	15.5	77.942	2653000	208680	12.7132
Q9NZC3	Glycerophosphodiester phosphodiesterase 1	GDE1	FUNCTION: Has glycerophosphoinositol phosphodiesterase activity. Hydrolyzes lysoglycerophospholipids to produce lysophosphatidic acid (LPA) and the corresponding amines. Has little or no activity towards glycerophosphocholine. GDE1 activity can be modulated by G-protein signaling pathways (By similarity). {ECO:0000250|UniProtKB:Q9JL55, ECO:0000250|UniProtKB:Q9JL56}.	sp|Q9NZC3|GDE1_HUMAN	sp|Q9NZC3|GDE1_HUMAN Glycerophosphodiester phosphodiesterase 1 OS=Homo sapiens OX=9606 GN=GDE1 PE=1 SV=1	1	2	2	2	10.3	37.718	496110	40345	12.2967
P29350	Tyrosine-protein phosphatase non-receptor type 6	PTPN6	FUNCTION: Modulates signaling by tyrosine phosphorylated cell surface receptors such as KIT and the EGF receptor/EGFR. The SH2 regions may interact with other cellular components to modulate its own phosphatase activity against interacting substrates. Together with MTUS1, induces UBE2V2 expression upon angiotensin II stimulation. Plays a key role in hematopoiesis. {ECO:0000269|PubMed:11266449}.	sp|P29350|PTN6_HUMAN	sp|P29350|PTN6_HUMAN Tyrosine-protein phosphatase non-receptor type 6 OS=Homo sapiens OX=9606 GN=PTPN6 PE=1 SV=1	1	2	2	2	5.7	67.56	129440	11390	11.3644
Q3KNS1	Patched domain-containing protein 3	PTCHD3	FUNCTION: May play a role in sperm development or sperm function. {ECO:0000269|PubMed:17904097}.	sp|Q3KNS1|PTHD3_HUMAN	sp|Q3KNS1|PTHD3_HUMAN Patched domain-containing protein 3 OS=Homo sapiens OX=9606 GN=PTCHD3 PE=1 SV=4	1	1	1	1	1	107.69	15972	1446.3	11.0434
Q9ULM6	CCR4-NOT transcription complex subunit 6	CNOT6	FUNCTION: Poly(A) nuclease with 3'-5' RNase activity. Catalytic component of the CCR4-NOT complex which is one of the major cellular mRNA deadenylases and is linked to various cellular processes including bulk mRNA degradation, miRNA-mediated repression, translational repression during translational initiation and general transcription regulation. Additional complex functions may be a consequence…	sp|Q9ULM6|CNOT6_HUMAN;sp|Q96LI5|CNO6L_HUMAN	sp|Q9ULM6|CNOT6_HUMAN CCR4-NOT transcription complex subunit 6 OS=Homo sapiens OX=9606 GN=CNOT6 PE=1 SV=2;sp|Q96LI5|CNO6L_HUMAN CCR4-NOT transcription complex subunit 6-like OS=Homo sapiens OX=9606 GN=CNOT6L PE=1 SV=2	2	3	3	3	6.3	63.306	650559	60617	10.7323
P30049	ATP synthase subunit delta, mitochondrial	ATP5F1D	FUNCTION: Mitochondrial membrane ATP synthase (F(1)F(0) ATP synthase or Complex V) produces ATP from ADP in the presence of a proton gradient across the membrane which is generated by electron transport complexes of the respiratory chain (PubMed:29478781). F-type ATPases consist of two structural domains, F(1) - containing the extramembraneous catalytic core, and F(0) - containing the membrane pr…	sp|P30049|ATPD_HUMAN	sp|P30049|ATPD_HUMAN ATP synthase subunit delta, mitochondrial OS=Homo sapiens OX=9606 GN=ATP5F1D PE=1 SV=2	1	2	2	2	13.7	17.49	2699900	258280	10.4534
P46937	Transcriptional coactivator YAP	YAP	FUNCTION: Transcriptional regulator which can act both as a coactivator and a corepressor and is the critical downstream regulatory target in the Hippo signaling pathway that plays a pivotal role in organ size control and tumor suppression by restricting proliferation and promoting apoptosis (PubMed:17974916, PubMed:18280240, PubMed:18579750, PubMed:21364637, PubMed:30447097). The core of this pa…	sp|P46937|YAP1_HUMAN	sp|P46937|YAP1_HUMAN Transcriptional coactivator YAP1 OS=Homo sapiens OX=9606 GN=YAP1 PE=1 SV=2	1	3	3	3	11.9	54.461	508399	49083	10.3579
Q9UL25	Ras-related protein Rab-21	RAB21	FUNCTION: Regulates integrin internalization and recycling, but does not influence the traffic of endosomally translocated receptors in general (By similarity). As a result, may regulate cell adhesion and migration (By similarity). During the mitosis of adherent cells, controls the endosomal trafficking of integrins which is required for the successful completion of cytokinesis (PubMed:18804435).…	sp|Q9UL25|RAB21_HUMAN	sp|Q9UL25|RAB21_HUMAN Ras-related protein Rab-21 OS=Homo sapiens OX=9606 GN=RAB21 PE=1 SV=3	1	7	7	7	42.2	24.347	2410000	235690	10.2253
O00154	Cytosolic acyl coenzyme A thioester hydrolase	ACOT7	FUNCTION: Acyl-CoA thioesterases are a group of enzymes that catalyze the hydrolysis of acyl-CoAs to the free fatty acid and coenzyme A (CoASH), providing the potential to regulate intracellular levels of acyl-CoAs, free fatty acids and CoASH (PubMed:10578051). Acyl-coenzyme A thioesterase 7/ACOT7 preferentially hydrolyzes palmitoyl-CoA, but has a broad specificity acting on other fatty acyl-CoAs…	sp|O00154|BACH_HUMAN	sp|O00154|BACH_HUMAN Cytosolic acyl coenzyme A thioester hydrolase OS=Homo sapiens OX=9606 GN=ACOT7 PE=1 SV=3	1	8	8	8	28.2	41.796	5306800	522580	10.155
Q9H944	Mediator of RNA polymerase II transcription subunit 20	MED20	FUNCTION: Component of the Mediator complex, a coactivator involved in the regulated transcription of nearly all RNA polymerase II-dependent genes. Mediator functions as a bridge to convey information from gene-specific regulatory proteins to the basal RNA polymerase II transcription machinery. Mediator is recruited to promoters by direct interactions with regulatory proteins and serves as a scaf…	sp|Q9H944|MED20_HUMAN	sp|Q9H944|MED20_HUMAN Mediator of RNA polymerase II transcription subunit 20 OS=Homo sapiens OX=9606 GN=MED20 PE=1 SV=1	1	3	3	3	21.7	23.222	528771	52957	9.98491
Q9BQ24	Zinc finger FYVE domain-containing protein 21	ZFYVE21	FUNCTION: Plays a role in cell adhesion, and thereby in cell motility which requires repeated formation and disassembly of focal adhesions. Regulates microtubule-induced PTK2/FAK1 dephosphorylation, an event important for focal adhesion disassembly, as well as integrin beta-1/ITGB1 cell surface expression. {ECO:0000269|PubMed:20439989, ECO:0000269|PubMed:21768110}.	sp|Q9BQ24|ZFY21_HUMAN	sp|Q9BQ24|ZFY21_HUMAN Zinc finger FYVE domain-containing protein 21 OS=Homo sapiens OX=9606 GN=ZFYVE21 PE=1 SV=1	1	3	3	3	21.8	26.505	233080	23417	9.95345
O95248	Myotubularin-related protein 5	SBF1	FUNCTION: Acts as an adapter for the phosphatase MTMR2 to regulate MTMR2 catalytic activity and subcellular location (PubMed:12668758). May function as a guanine nucleotide exchange factor (GEF) activating RAB28 (PubMed:20937701). Promotes the exchange of GDP to GTP, converting inactive GDP-bound Rab proteins into their active GTP-bound form (PubMed:20937701). Inhibits myoblast differentiation in…	sp|O95248|MTMR5_HUMAN	sp|O95248|MTMR5_HUMAN Myotubularin-related protein 5 OS=Homo sapiens OX=9606 GN=SBF1 PE=1 SV=4	1	19	19	19	15.4	208.44	3583300	372230	9.62657
P53778	Mitogen-activated protein kinase 12	MAPK12	FUNCTION: Serine/threonine kinase which acts as an essential component of the MAP kinase signal transduction pathway. MAPK12 is one of the four p38 MAPKs which play an important role in the cascades of cellular responses evoked by extracellular stimuli such as proinflammatory cytokines or physical stress leading to direct activation of transcription factors such as ELK1 and ATF2. Accordingly, p38…	sp|P53778|MK12_HUMAN	sp|P53778|MK12_HUMAN Mitogen-activated protein kinase 12 OS=Homo sapiens OX=9606 GN=MAPK12 PE=1 SV=3	1	2	2	2	8.2	41.94	170970	18055	9.4694
O95336	6-phosphogluconolactonase	PGLS	FUNCTION: Hydrolysis of 6-phosphogluconolactone to 6-phosphogluconate.	sp|O95336|6PGL_HUMAN	sp|O95336|6PGL_HUMAN 6-phosphogluconolactonase OS=Homo sapiens OX=9606 GN=PGLS PE=1 SV=2	1	8	8	8	38.8	27.547	2188400	232420	9.41571
P52943	Cysteine-rich protein 2	CRIP2		sp|P52943|CRIP2_HUMAN	sp|P52943|CRIP2_HUMAN Cysteine-rich protein 2 OS=Homo sapiens OX=9606 GN=CRIP2 PE=1 SV=1	1	2	2	2	23.1	22.492	599110	63653	9.41213
Q9UFF9	CCR4-NOT transcription complex subunit 8	CNOT8	FUNCTION: Has 3'-5' poly(A) exoribonuclease activity for synthetic poly(A) RNA substrate. Its function seems to be partially redundant with that of CNOT7. Catalytic component of the CCR4-NOT complex which is linked to various cellular processes including bulk mRNA degradation, miRNA-mediated repression, translational repression during translational initiation and general transcription regulation.…	sp|Q9UFF9|CNOT8_HUMAN	sp|Q9UFF9|CNOT8_HUMAN CCR4-NOT transcription complex subunit 8 OS=Homo sapiens OX=9606 GN=CNOT8 PE=1 SV=1	1	3	3	3	15.8	33.54	491782	52271	9.40831
Q9Y6N7	Roundabout homolog 1	ROBO1	FUNCTION: Receptor for SLIT1 and SLIT2 that mediates cellular responses to molecular guidance cues in cellular migration, including axonal navigation at the ventral midline of the neural tube and projection of axons to different regions during neuronal development (PubMed:10102268, PubMed:24560577). Interaction with the intracellular domain of FLRT3 mediates axon attraction towards cells expressi…	sp|Q9Y6N7|ROBO1_HUMAN	sp|Q9Y6N7|ROBO1_HUMAN Roundabout homolog 1 OS=Homo sapiens OX=9606 GN=ROBO1 PE=1 SV=1	1	4	4	4	4.2	180.93	217400	23189	9.37513
O43824	Putative GTP-binding protein 6	GTPBP6		sp|O43824|GTPB6_HUMAN	sp|O43824|GTPB6_HUMAN Putative GTP-binding protein 6 OS=Homo sapiens OX=9606 GN=GTPBP6 PE=1 SV=4	1	6	6	6	16.3	56.897	636920	68109	9.35148
Q96KG9	N-terminal kinase-like protein	SCYL1	FUNCTION: Regulates COPI-mediated retrograde protein traffic at the interface between the Golgi apparatus and the endoplasmic reticulum (PubMed:18556652). Involved in the maintenance of the Golgi apparatus morphology (PubMed:26581903). Has no detectable kinase activity in vitro (PubMed:18556652). {ECO:0000269|PubMed:18556652, ECO:0000269|PubMed:26581903}.; FUNCTION: Isoform 6 acts as transcriptio…	sp|Q96KG9|SCYL1_HUMAN	sp|Q96KG9|SCYL1_HUMAN N-terminal kinase-like protein OS=Homo sapiens OX=9606 GN=SCYL1 PE=1 SV=1	1	9	9	9	21	89.63	1593300	172180	9.25369
Q9H0V9	VIP36-like protein	LMAN2L	FUNCTION: May be involved in the regulation of export from the endoplasmic reticulum of a subset of glycoproteins. May function as a regulator of ERGIC-53. {ECO:0000269|PubMed:12878160}.	sp|Q9H0V9|LMA2L_HUMAN	sp|Q9H0V9|LMA2L_HUMAN VIP36-like protein OS=Homo sapiens OX=9606 GN=LMAN2L PE=1 SV=1	1	5	5	4	23.6	39.71	1370100	149870	9.14192
Q8WUM0	Nuclear pore complex protein Nup133	NUP133	FUNCTION: Involved in poly(A)+ RNA transport. Involved in nephrogenesis (PubMed:30179222). {ECO:0000269|PubMed:11684705, ECO:0000269|PubMed:30179222}.	sp|Q8WUM0|NU133_HUMAN	sp|Q8WUM0|NU133_HUMAN Nuclear pore complex protein Nup133 OS=Homo sapiens OX=9606 GN=NUP133 PE=1 SV=2	1	8	8	8	8.7	128.98	1100300	120770	9.11071
P40425	Pre-B-cell leukemia transcription factor 2	PBX2	FUNCTION: Transcriptional activator that binds the sequence 5'-ATCAATCAA-3'. Activates transcription of PF4 in complex with MEIS1. {ECO:0000269|PubMed:12609849}.	sp|P40425|PBX2_HUMAN	sp|P40425|PBX2_HUMAN Pre-B-cell leukemia transcription factor 2 OS=Homo sapiens OX=9606 GN=PBX2 PE=1 SV=2	1	6	6	5	21.2	45.881	453222	50426	8.98786
Q9Y305	Acyl-coenzyme A thioesterase 9, mitochondrial	ACOT9	FUNCTION: Acyl-CoA thioesterases are a group of enzymes that catalyze the hydrolysis of acyl-CoAs to the free fatty acid and coenzyme A (CoASH), providing the potential to regulate intracellular levels of acyl-CoAs, free fatty acids and CoASH. Active on long chain acyl-CoAs.	sp|Q9Y305|ACOT9_HUMAN	sp|Q9Y305|ACOT9_HUMAN Acyl-coenzyme A thioesterase 9, mitochondrial OS=Homo sapiens OX=9606 GN=ACOT9 PE=1 SV=2	1	8	8	8	21.4	49.901	4350700	487700	8.92085
P63218	Guanine nucleotide-binding protein G(I)/G(S)/G(O) subunit gamma-5	GNG5	FUNCTION: Guanine nucleotide-binding proteins (G proteins) are involved as a modulator or transducer in various transmembrane signaling systems. The beta and gamma chains are required for the GTPase activity, for replacement of GDP by GTP, and for G protein-effector interaction.	sp|P63218|GBG5_HUMAN;sp|A0A804HLA8|GBG5B_HUMAN	sp|P63218|GBG5_HUMAN Guanine nucleotide-binding protein G(I)/G(S)/G(O) subunit gamma-5 OS=Homo sapiens OX=9606 GN=GNG5 PE=1 SV=3;sp|A0A804HLA8|GBG5B_HUMAN Guanine nucleotide-binding protein G(I)/G(S)/G(O) subunit gamma-5B OS=Homo sapiens OX=9606 GN=GNG5B P	2	4	4	4	77.9	7.3184	983590	110950	8.86516
P42345	Serine/threonine-protein kinase mTOR	MTOR	FUNCTION: Serine/threonine protein kinase which is a central regulator of cellular metabolism, growth and survival in response to hormones, growth factors, nutrients, energy and stress signals (PubMed:12087098, PubMed:12150925, PubMed:12150926, PubMed:12231510, PubMed:12718876, PubMed:14651849, PubMed:15268862, PubMed:15467718, PubMed:15545625, PubMed:15718470, PubMed:18497260, PubMed:18762023, P…	sp|P42345|MTOR_HUMAN	sp|P42345|MTOR_HUMAN Serine/threonine-protein kinase mTOR OS=Homo sapiens OX=9606 GN=MTOR PE=1 SV=1	1	29	29	29	15.8	288.89	3325400	378350	8.78922
P86791	Vacuolar fusion protein CCZ1 homolog	CCZ1	FUNCTION: Acts in concert with MON1A, as a guanine exchange factor (GEF) for RAB7, promotes the exchange of GDP to GTP, converting it from an inactive GDP-bound form into an active GTP-bound form (PubMed:23084991). {ECO:0000269|PubMed:23084991}.	sp|P86791|CCZ1_HUMAN;sp|P86790|CCZ1B_HUMAN	sp|P86791|CCZ1_HUMAN Vacuolar fusion protein CCZ1 homolog OS=Homo sapiens OX=9606 GN=CCZ1 PE=1 SV=1;sp|P86790|CCZ1B_HUMAN Vacuolar fusion protein CCZ1 homolog B OS=Homo sapiens OX=9606 GN=CCZ1B PE=1 SV=1	2	9	9	9	24.7	55.866	1397600	159460	8.76458
O15270	Serine palmitoyltransferase 2	SPTLC2	FUNCTION: Serine palmitoyltransferase (SPT). The heterodimer formed with LCB1/SPTLC1 constitutes the catalytic core. The composition of the serine palmitoyltransferase (SPT) complex determines the substrate preference. The SPTLC1-SPTLC2-SPTSSA complex shows a strong preference for C16-CoA substrate, while the SPTLC1-SPTLC2-SPTSSB complex displays a preference for C18-CoA substrate. Plays an impor…	sp|O15270|SPTC2_HUMAN	sp|O15270|SPTC2_HUMAN Serine palmitoyltransferase 2 OS=Homo sapiens OX=9606 GN=SPTLC2 PE=1 SV=1	1	9	9	9	23.7	62.924	1371500	158000	8.68038
Q9UJ68	Mitochondrial peptide methionine sulfoxide reductase	MSRA	FUNCTION: Has an important function as a repair enzyme for proteins that have been inactivated by oxidation. Catalyzes the reversible oxidation-reduction of methionine sulfoxide in proteins to methionine.	sp|Q9UJ68|MSRA_HUMAN	sp|Q9UJ68|MSRA_HUMAN Mitochondrial peptide methionine sulfoxide reductase OS=Homo sapiens OX=9606 GN=MSRA PE=1 SV=1	1	2	2	2	12.8	26.132	170140	19886	8.55577
O60678	Protein arginine N-methyltransferase 3	PRMT3	FUNCTION: Methylates (mono and asymmetric dimethylation) the guanidino nitrogens of arginyl residues in some proteins.	sp|O60678|ANM3_HUMAN	sp|O60678|ANM3_HUMAN Protein arginine N-methyltransferase 3 OS=Homo sapiens OX=9606 GN=PRMT3 PE=1 SV=4	1	10	10	10	21.3	59.902	814070	95867	8.49166
Q9NZZ3	Charged multivesicular body protein 5	CHMP5	FUNCTION: Probable peripherally associated component of the endosomal sorting required for transport complex III (ESCRT-III) which is involved in multivesicular bodies (MVBs) formation and sorting of endosomal cargo proteins into MVBs. MVBs contain intraluminal vesicles (ILVs) that are generated by invagination and scission from the limiting membrane of the endosome and mostly are delivered to ly…	sp|Q9NZZ3|CHMP5_HUMAN	sp|Q9NZZ3|CHMP5_HUMAN Charged multivesicular body protein 5 OS=Homo sapiens OX=9606 GN=CHMP5 PE=1 SV=1	1	3	3	3	25.1	24.57	4278700	505990	8.4561
Q9H204	Mediator of RNA polymerase II transcription subunit 28	MED28	FUNCTION: Component of the Mediator complex, a coactivator involved in the regulated transcription of nearly all RNA polymerase II-dependent genes. Mediator functions as a bridge to convey information from gene-specific regulatory proteins to the basal RNA polymerase II transcription machinery. Mediator is recruited to promoters by direct interactions with regulatory proteins and serves as a scaf…	sp|Q9H204|MED28_HUMAN	sp|Q9H204|MED28_HUMAN Mediator of RNA polymerase II transcription subunit 28 OS=Homo sapiens OX=9606 GN=MED28 PE=1 SV=1	1	3	3	3	27.5	19.52	449333	54088	8.30744
O95429	BAG family molecular chaperone regulator 4	BAG4	FUNCTION: Inhibits the chaperone activity of HSP70/HSC70 by promoting substrate release (By similarity). Prevents constitutive TNFRSF1A signaling. Negative regulator of PRKN translocation to damaged mitochondria. {ECO:0000250, ECO:0000269|PubMed:24270810}.	sp|O95429|BAG4_HUMAN	sp|O95429|BAG4_HUMAN BAG family molecular chaperone regulator 4 OS=Homo sapiens OX=9606 GN=BAG4 PE=1 SV=1	1	2	2	2	6.3	49.593	121040	14717	8.2245
O95219	Sorting nexin-4	SNX4	FUNCTION: Involved in the regulation of endocytosis and in several stages of intracellular trafficking (PubMed:12668730). Plays a role in recycling endocytosed transferrin receptor and prevent its degradation. {ECO:0000269|PubMed:12668730, ECO:0000269|PubMed:17994011}.	sp|O95219|SNX4_HUMAN	sp|O95219|SNX4_HUMAN Sorting nexin-4 OS=Homo sapiens OX=9606 GN=SNX4 PE=1 SV=1	1	8	8	8	24.7	51.908	737180	90676	8.12982
P50579	Methionine aminopeptidase 2	METAP2	FUNCTION: Cotranslationally removes the N-terminal methionine from nascent proteins. The N-terminal methionine is often cleaved when the second residue in the primary sequence is small and uncharged (Met-Ala-, Cys, Gly, Pro, Ser, Thr, or Val). The catalytic activity of human METAP2 toward Met-Val peptides is consistently two orders of magnitude higher than that of METAP1, suggesting that it is re…	sp|P50579|MAP2_HUMAN	sp|P50579|MAP2_HUMAN Methionine aminopeptidase 2 OS=Homo sapiens OX=9606 GN=METAP2 PE=1 SV=1	1	13	13	13	43.3	52.891	6461100	803310	8.0431
Q96S52	GPI transamidase component PIG-S	PIGS	FUNCTION: Component of the GPI transamidase complex. Essential for transfer of GPI to proteins, particularly for formation of carbonyl intermediates. {ECO:0000269|PubMed:11483512, ECO:0000269|PubMed:30269814}.	sp|Q96S52|PIGS_HUMAN	sp|Q96S52|PIGS_HUMAN GPI transamidase component PIG-S OS=Homo sapiens OX=9606 GN=PIGS PE=1 SV=3	1	9	9	9	25.2	61.655	4058200	505400	8.02968
Q9UPQ3	Arf-GAP with GTPase, ANK repeat and PH domain-containing protein 1	AGAP1	FUNCTION: GTPase-activating protein for ARF1 and, to a lesser extent, ARF5. Directly and specifically regulates the adapter protein 3 (AP-3)-dependent trafficking of proteins in the endosomal-lysosomal system. {ECO:0000269|PubMed:12640130}.	sp|Q9UPQ3|AGAP1_HUMAN;sp|Q96P47|AGAP3_HUMAN	sp|Q9UPQ3|AGAP1_HUMAN Arf-GAP with GTPase, ANK repeat and PH domain-containing protein 1 OS=Homo sapiens OX=9606 GN=AGAP1 PE=1 SV=4;sp|Q96P47|AGAP3_HUMAN Arf-GAP with GTPase, ANK repeat and PH domain-containing protein 3 OS=Homo sapiens OX=9606 GN=AGAP3 PE	2	1	1	1	1.9	94.469	70249	8758.3	8.02085
Q96K37	Solute carrier family 35 member E1	SLC35E1	FUNCTION: Putative transporter. {ECO:0000250}.	sp|Q96K37|S35E1_HUMAN	sp|Q96K37|S35E1_HUMAN Solute carrier family 35 member E1 OS=Homo sapiens OX=9606 GN=SLC35E1 PE=1 SV=2	1	2	2	2	8.8	44.772	642370	80476	7.98213
Q92547	DNA topoisomerase 2-binding protein 1	TOPBP1	FUNCTION: Required for DNA replication. Plays a role in the rescue of stalled replication forks and checkpoint control. Binds double-stranded DNA breaks and nicks as well as single-stranded DNA. Recruits the SWI/SNF chromatin remodeling complex to E2F1-responsive promoters. Down-regulates E2F1 activity and inhibits E2F1-dependent apoptosis during G1/S transition and after DNA damage. Induces a la…	sp|Q92547|TOPB1_HUMAN	sp|Q92547|TOPB1_HUMAN DNA topoisomerase 2-binding protein 1 OS=Homo sapiens OX=9606 GN=TOPBP1 PE=1 SV=3	1	7	7	7	7.4	170.68	548520	70131	7.82136
Q9NY93	Probable ATP-dependent RNA helicase DDX56	DDX56	FUNCTION: May play a role in later stages of the processing of the pre-ribosomal particles leading to mature 60S ribosomal subunits. Has intrinsic ATPase activity.	sp|Q9NY93|DDX56_HUMAN	sp|Q9NY93|DDX56_HUMAN Probable ATP-dependent RNA helicase DDX56 OS=Homo sapiens OX=9606 GN=DDX56 PE=1 SV=1	1	2	2	2	4.6	61.589	53825	6896.5	7.80468
Q16778	Histone H2B type 2-E	H2BC21	FUNCTION: Core component of nucleosome. Nucleosomes wrap and compact DNA into chromatin, limiting DNA accessibility to the cellular machineries which require DNA as a template. Histones thereby play a central role in transcription regulation, DNA repair, DNA replication and chromosomal stability. DNA accessibility is regulated via a complex set of post-translational modifications of histones, als…	sp|Q16778|H2B2E_HUMAN;sp|P33778|H2B1B_HUMAN;sp|P23527|H2B1O_HUMAN;sp|P06899|H2B1J_HUMAN;sp|Q8N257|H2B3B_HUMAN;sp|Q6DRA6|H2B2D_HUMAN;sp|Q6DN03|H2B2C_HUMAN	sp|Q16778|H2B2E_HUMAN Histone H2B type 2-E OS=Homo sapiens OX=9606 GN=H2BC21 PE=1 SV=3;sp|P33778|H2B1B_HUMAN Histone H2B type 1-B OS=Homo sapiens OX=9606 GN=H2BC3 PE=1 SV=2;sp|P23527|H2B1O_HUMAN Histone H2B type 1-O OS=Homo sapiens OX=9606 GN=H2BC17 PE=1 S	7	7	2	2	47.6	13.92	745390	95880	7.7742
O43708	Maleylacetoacetate isomerase	GSTZ1	FUNCTION: Bifunctional enzyme showing minimal glutathione-conjugating activity with ethacrynic acid and 7-chloro-4-nitrobenz-2-oxa-1,3-diazole and maleylacetoacetate isomerase activity. Has also low glutathione peroxidase activity with T-butyl and cumene hydroperoxides. Is able to catalyze the glutathione dependent oxygenation of dichloroacetic acid to glyoxylic acid. {ECO:0000269|PubMed:10739172…	sp|O43708|MAAI_HUMAN	sp|O43708|MAAI_HUMAN Maleylacetoacetate isomerase OS=Homo sapiens OX=9606 GN=GSTZ1 PE=1 SV=3	1	3	3	3	19.9	24.212	1311600	169640	7.73167
Q9BW92	Threonine--tRNA ligase, mitochondrial	TARS2	FUNCTION: Catalyzes the attachment of threonine to tRNA(Thr) in a two-step reaction: threonine is first activated by ATP to form Thr-AMP and then transferred to the acceptor end of tRNA(Thr). Also edits incorrectly charged tRNA(Thr) via its editing domain. {ECO:0000269|PubMed:26811336}.	sp|Q9BW92|SYTM_HUMAN	sp|Q9BW92|SYTM_HUMAN Threonine--tRNA ligase, mitochondrial OS=Homo sapiens OX=9606 GN=TARS2 PE=1 SV=1	1	14	14	14	26	81.035	10749000	1392600	7.71866
Q8WUF8	Cotranscriptional regulator FAM172A	FAM172A	FUNCTION: Plays a role in the regulation of alternative splicing, by interacting with AGO2 and CHD7. Seems to be required for stabilizing protein-protein interactions at the chromatin-spliceosome interface. May have hydrolase activity. {ECO:0000250|UniProtKB:Q3TNH5}.	sp|Q8WUF8|F172A_HUMAN	sp|Q8WUF8|F172A_HUMAN Cotranscriptional regulator FAM172A OS=Homo sapiens OX=9606 GN=FAM172A PE=1 SV=1	1	1	1	1	3.6	47.972	371955	48414	7.6828
P35321	Cornifin-A	SPRR1A	FUNCTION: Cross-linked envelope protein of keratinocytes. It is a keratinocyte protein that first appears in the cell cytosol, but ultimately becomes cross-linked to membrane proteins by transglutaminase. All that results in the formation of an insoluble envelope beneath the plasma membrane.	sp|P35321|SPR1A_HUMAN;sp|P22528|SPR1B_HUMAN	sp|P35321|SPR1A_HUMAN Cornifin-A OS=Homo sapiens OX=9606 GN=SPRR1A PE=1 SV=2;sp|P22528|SPR1B_HUMAN Cornifin-B OS=Homo sapiens OX=9606 GN=SPRR1B PE=1 SV=2	2	3	3	3	52.8	9.8774	138130	18047	7.6539
Q9NTZ6	RNA-binding protein 12	RBM12		sp|Q9NTZ6|RBM12_HUMAN	sp|Q9NTZ6|RBM12_HUMAN RNA-binding protein 12 OS=Homo sapiens OX=9606 GN=RBM12 PE=1 SV=1	1	14	14	14	17	97.394	4358200	581740	7.49166
P61962	DDB1- and CUL4-associated factor 7	DCAF7	FUNCTION: Involved in craniofacial development. Acts upstream of the EDN1 pathway and is required for formation of the upper jaw equivalent, the palatoquadrate. The activity required for EDN1 pathway function differs between the first and second arches (By similarity). Associates with DIAPH1 and controls GLI1 transcriptional activity. Could be involved in normal and disease skin development. May …	sp|P61962|DCAF7_HUMAN	sp|P61962|DCAF7_HUMAN DDB1- and CUL4-associated factor 7 OS=Homo sapiens OX=9606 GN=DCAF7 PE=1 SV=1	1	9	9	9	36.8	38.926	3820500	511440	7.47008
Q86XL3	Ankyrin repeat and LEM domain-containing protein 2	ANKLE2	FUNCTION: Involved in mitotic nuclear envelope reassembly by promoting dephosphorylation of BAF/BANF1 during mitotic exit. Coordinates the control of BAF/BANF1 dephosphorylation by inhibiting VRK1 kinase and promoting dephosphorylation of BAF/BANF1 by protein phosphatase 2A (PP2A), thereby facilitating nuclear envelope assembly. It is unclear whether it acts as a real PP2A regulatory subunit or w…	sp|Q86XL3|ANKL2_HUMAN	sp|Q86XL3|ANKL2_HUMAN Ankyrin repeat and LEM domain-containing protein 2 OS=Homo sapiens OX=9606 GN=ANKLE2 PE=1 SV=4	1	15	15	15	21	104.11	2637200	355500	7.41828
Q6P158	Putative ATP-dependent RNA helicase DHX57	DHX57	FUNCTION: Probable ATP-binding RNA helicase.	sp|Q6P158|DHX57_HUMAN	sp|Q6P158|DHX57_HUMAN Putative ATP-dependent RNA helicase DHX57 OS=Homo sapiens OX=9606 GN=DHX57 PE=1 SV=2	1	12	12	12	12.8	155.6	1673300	226070	7.40169
Q96HN2	Adenosylhomocysteinase 3	AHCYL2	FUNCTION: May regulate the electrogenic sodium/bicarbonate cotransporter SLC4A4 activity and Mg(2+)-sensitivity. On the contrary of its homolog AHCYL1, does not regulate ITPR1 sensitivity to inositol 1,4,5-trisphosphate (PubMed:19220705). {ECO:0000250|UniProtKB:A6QLP2, ECO:0000269|PubMed:19220705}.	sp|Q96HN2|SAHH3_HUMAN	sp|Q96HN2|SAHH3_HUMAN Adenosylhomocysteinase 3 OS=Homo sapiens OX=9606 GN=AHCYL2 PE=1 SV=1	1	12	12	4	20	66.72	2633500	363840	7.23807
Q99996	A-kinase anchor protein 9	AKAP9	FUNCTION: Scaffolding protein that assembles several protein kinases and phosphatases on the centrosome and Golgi apparatus. Required to maintain the integrity of the Golgi apparatus (PubMed:10202149, PubMed:15047863). Required for microtubule nucleation at the cis-side of the Golgi apparatus (PubMed:15047863, PubMed:19242490). Required for association of the centrosomes with the poles of the bip…	sp|Q99996|AKAP9_HUMAN	sp|Q99996|AKAP9_HUMAN A-kinase anchor protein 9 OS=Homo sapiens OX=9606 GN=AKAP9 PE=1 SV=4	1	18	18	18	6	452.98	2078000	288280	7.20827
P98172	Ephrin-B1	EFNB1	FUNCTION: Cell surface transmembrane ligand for Eph receptors, a family of receptor tyrosine kinases which are crucial for migration, repulsion and adhesion during neuronal, vascular and epithelial development (PubMed:8070404, PubMed:7973638). Binding to Eph receptors residing on adjacent cells leads to contact-dependent bidirectional signaling into neighboring cells (PubMed:8070404, PubMed:79736…	sp|P98172|EFNB1_HUMAN	sp|P98172|EFNB1_HUMAN Ephrin-B1 OS=Homo sapiens OX=9606 GN=EFNB1 PE=1 SV=1	1	9	9	8	47.4	38.006	1967800	276270	7.12274
Q6Y288	Beta-1,3-glucosyltransferase	B3GLCT	FUNCTION: O-glucosyltransferase that transfers glucose toward fucose with a beta-1,3 linkage. Specifically glucosylates O-linked fucosylglycan on TSP type-1 domains of proteins, thereby contributing to elongation of O-fucosylglycan. {ECO:0000269|PubMed:16899492}.	sp|Q6Y288|B3GLT_HUMAN	sp|Q6Y288|B3GLT_HUMAN Beta-1,3-glucosyltransferase OS=Homo sapiens OX=9606 GN=B3GLCT PE=1 SV=2	1	3	3	3	8.8	56.563	4169600	591100	7.05397
O00194	Ras-related protein Rab-27B	RAB27B	FUNCTION: Small GTPase which cycles between active GTP-bound and inactive GDP-bound states. In its active state, binds to a variety of effector proteins to regulate homeostasis of late endocytic pathway, including endosomal positioning, maturation and secretion (PubMed:30771381). Plays a role in NTRK2/TRKB axonal anterograde transport by facilitating the association of NTRK2/TRKB with KLC1 (PubMe…	sp|O00194|RB27B_HUMAN	sp|O00194|RB27B_HUMAN Ras-related protein Rab-27B OS=Homo sapiens OX=9606 GN=RAB27B PE=1 SV=4	1	3	3	2	19.3	24.608	332870	47763	6.9692
Q9ULK4	Mediator of RNA polymerase II transcription subunit 23	MED23	FUNCTION: Required for transcriptional activation subsequent to the assembly of the pre-initiation complex (By similarity). Component of the Mediator complex, a coactivator involved in the regulated transcription of nearly all RNA polymerase II-dependent genes. Mediator functions as a bridge to convey information from gene-specific regulatory proteins to the basal RNA polymerase II transcription …	sp|Q9ULK4|MED23_HUMAN	sp|Q9ULK4|MED23_HUMAN Mediator of RNA polymerase II transcription subunit 23 OS=Homo sapiens OX=9606 GN=MED23 PE=1 SV=2	1	12	12	12	11.6	156.47	340289	48861	6.96443
Q9UG01	Intraflagellar transport protein 172 homolog	IFT172	FUNCTION: Required for the maintenance and formation of cilia. Plays an indirect role in hedgehog (Hh) signaling, cilia being required for all activity of the hedgehog pathway (By similarity). {ECO:0000250}.	sp|Q9UG01|IF172_HUMAN	sp|Q9UG01|IF172_HUMAN Intraflagellar transport protein 172 homolog OS=Homo sapiens OX=9606 GN=IFT172 PE=1 SV=2	1	6	6	6	4.7	197.57	292280	42529	6.87249
P17900	Ganglioside GM2 activator	GM2A	FUNCTION: The large binding pocket can accommodate several single chain phospholipids and fatty acids, GM2A also exhibits some calcium-independent phospholipase activity (By similarity). Binds gangliosides and stimulates ganglioside GM2 degradation. It stimulates only the breakdown of ganglioside GM2 and glycolipid GA2 by beta-hexosaminidase A. It extracts single GM2 molecules from membranes and …	sp|P17900|SAP3_HUMAN	sp|P17900|SAP3_HUMAN Ganglioside GM2 activator OS=Homo sapiens OX=9606 GN=GM2A PE=1 SV=4	1	1	1	1	5.7	20.838	629530	92098	6.83544
P53597	Succinate--CoA ligase [ADP/GDP-forming] subunit alpha, mitochondrial	SUCLG1	FUNCTION: Succinyl-CoA synthetase functions in the citric acid cycle (TCA), coupling the hydrolysis of succinyl-CoA to the synthesis of either ATP or GTP and thus represents the only step of substrate-level phosphorylation in the TCA. The alpha subunit of the enzyme binds the substrates coenzyme A and phosphate, while succinate binding and specificity for either ATP or GTP is provided by differen…	sp|P53597|SUCA_HUMAN	sp|P53597|SUCA_HUMAN Succinate--CoA ligase [ADP/GDP-forming] subunit alpha, mitochondrial OS=Homo sapiens OX=9606 GN=SUCLG1 PE=1 SV=4	1	5	5	5	24.3	36.249	11528000	1690000	6.8213
Q9P260	RAB11-binding protein RELCH	RELCH	FUNCTION: Regulates intracellular cholesterol distribution from recycling endosomes to the trans-Golgi network through interactions with RAB11 and OSBP (PubMed:29514919). Functions in membrane tethering and promotes OSBP-mediated cholesterol transfer between RAB11-bound recycling endosomes and OSBP-bound Golgi-like membranes (PubMed:29514919). {ECO:0000269|PubMed:29514919}.	sp|Q9P260|RELCH_HUMAN	sp|Q9P260|RELCH_HUMAN RAB11-binding protein RELCH OS=Homo sapiens OX=9606 GN=RELCH PE=1 SV=2	1	20	20	20	26.2	134.63	4153000	610720	6.80017
P49005	DNA polymerase delta subunit 2	POLD2	FUNCTION: Accessory component of both the DNA polymerase delta complex and the DNA polymerase zeta complex (PubMed:22801543, PubMed:17317665, PubMed:24449906). As a component of the trimeric and tetrameric DNA polymerase delta complexes (Pol-delta3 and Pol-delta4, respectively), plays a role in high fidelity genome replication, including in lagging strand synthesis, and repair (PubMed:12403614, P…	sp|P49005|DPOD2_HUMAN	sp|P49005|DPOD2_HUMAN DNA polymerase delta subunit 2 OS=Homo sapiens OX=9606 GN=POLD2 PE=1 SV=1	1	7	7	7	24.3	51.289	2243500	332330	6.75082
Q9P013	Spliceosome-associated protein CWC15 homolog	CWC15	FUNCTION: Involved in pre-mRNA splicing as component of the spliceosome (PubMed:28502770, PubMed:28076346). Component of the PRP19-CDC5L complex that forms an integral part of the spliceosome and is required for activating pre-mRNA splicing. {ECO:0000269|PubMed:20176811, ECO:0000269|PubMed:28076346, ECO:0000269|PubMed:28502770}.	sp|Q9P013|CWC15_HUMAN	sp|Q9P013|CWC15_HUMAN Spliceosome-associated protein CWC15 homolog OS=Homo sapiens OX=9606 GN=CWC15 PE=1 SV=2	1	1	1	1	4.8	26.624	66115	9842.7	6.71716
Q6P1A2	Lysophospholipid acyltransferase 5	LPCAT3	FUNCTION: Acyltransferase which mediates the conversion of lysophosphatidylcholine (1-acyl-sn-glycero-3-phosphocholine or LPC) into phosphatidylcholine (1,2-diacyl-sn-glycero-3-phosphocholine or PC) (LPCAT activity). Catalyzes also the conversion of lysophosphatidylserine (1-acyl-2-hydroxy-sn-glycero-3-phospho-L-serine or LPS) into phosphatidylserine (1,2-diacyl-sn-glycero-3-phospho-L-serine or P…	sp|Q6P1A2|MBOA5_HUMAN	sp|Q6P1A2|MBOA5_HUMAN Lysophospholipid acyltransferase 5 OS=Homo sapiens OX=9606 GN=LPCAT3 PE=1 SV=1	1	3	3	3	6.2	56.034	454080	68778	6.60211
P61457	Pterin-4-alpha-carbinolamine dehydratase	PCBD1	FUNCTION: Involved in tetrahydrobiopterin biosynthesis. Seems to both prevent the formation of 7-pterins and accelerate the formation of quinonoid-BH2. Coactivator for HNF1A-dependent transcription. Regulates the dimerization of homeodomain protein HNF1A and enhances its transcriptional activity.	sp|P61457|PHS_HUMAN	sp|P61457|PHS_HUMAN Pterin-4-alpha-carbinolamine dehydratase OS=Homo sapiens OX=9606 GN=PCBD1 PE=1 SV=2	1	4	4	4	56.7	11.999	1551900	239010	6.49303
P42224	Signal transducer and activator of transcription 1-alpha/beta	STAT1	FUNCTION: Signal transducer and transcription activator that mediates cellular responses to interferons (IFNs), cytokine KITLG/SCF and other cytokines and other growth factors. Following type I IFN (IFN-alpha and IFN-beta) binding to cell surface receptors, signaling via protein kinases leads to activation of Jak kinases (TYK2 and JAK1) and to tyrosine phosphorylation of STAT1 and STAT2. The phos…	sp|P42224|STAT1_HUMAN	sp|P42224|STAT1_HUMAN Signal transducer and activator of transcription 1-alpha/beta OS=Homo sapiens OX=9606 GN=STAT1 PE=1 SV=2	1	17	17	17	26.8	87.334	324234	50150	6.46528
Q5VTR2	E3 ubiquitin-protein ligase BRE1A	RNF20	FUNCTION: Component of the RNF20/40 E3 ubiquitin-protein ligase complex that mediates monoubiquitination of 'Lys-120' of histone H2B (H2BK120ub1). H2BK120ub1 gives a specific tag for epigenetic transcriptional activation and is also prerequisite for histone H3 'Lys-4' and 'Lys-79' methylation (H3K4me and H3K79me, respectively). It thereby plays a central role inb histone code and gene regulation.…	sp|Q5VTR2|BRE1A_HUMAN	sp|Q5VTR2|BRE1A_HUMAN E3 ubiquitin-protein ligase BRE1A OS=Homo sapiens OX=9606 GN=RNF20 PE=1 SV=2	1	17	17	17	21.3	113.66	3942400	610260	6.4602
Q01995	Transgelin	TAGLN	FUNCTION: Actin cross-linking/gelling protein (By similarity). Involved in calcium interactions and contractile properties of the cell that may contribute to replicative senescence. {ECO:0000250}.	sp|Q01995|TAGL_HUMAN	sp|Q01995|TAGL_HUMAN Transgelin OS=Homo sapiens OX=9606 GN=TAGLN PE=1 SV=4	1	1	1	1	5.5	22.611	11386	1764	6.45465
C4AMC7	Putative WAS protein family homolog 3	WASH3P	FUNCTION: Acts as a nucleation-promoting factor at the surface of endosomes, where it recruits and activates the Arp2/3 complex to induce actin polymerization, playing a key role in the fission of tubules that serve as transport intermediates during endosome sorting (PubMed:18159949, PubMed:20175130). Involved in endocytic trafficking of EGF (PubMed:20175130). Involved in transferrin receptor rec…	sp|C4AMC7|WASH3_HUMAN;sp|Q6VEQ5|WASH2_HUMAN;sp|A8K0Z3|WASH1_HUMAN;sp|A8MWX3|WASH4_HUMAN	sp|C4AMC7|WASH3_HUMAN Putative WAS protein family homolog 3 OS=Homo sapiens OX=9606 GN=WASH3P PE=1 SV=2;sp|Q6VEQ5|WASH2_HUMAN WAS protein family homolog 2 OS=Homo sapiens OX=9606 GN=WASH2P PE=2 SV=2;sp|A8K0Z3|WASH1_HUMAN WASH complex subunit 1 OS=Homo sapi	4	4	1	1	12.7	49.994	82283	12826	6.41533
Q9H8S9	MOB kinase activator 1A	MOB1A	FUNCTION: Activator of LATS1/2 in the Hippo signaling pathway which plays a pivotal role in organ size control and tumor suppression by restricting proliferation and promoting apoptosis. The core of this pathway is composed of a kinase cascade wherein STK3/MST2 and STK4/MST1, in complex with its regulatory protein SAV1, phosphorylates and activates LATS1/2 in complex with its regulatory protein M…	sp|Q9H8S9|MOB1A_HUMAN;sp|Q7L9L4|MOB1B_HUMAN	sp|Q9H8S9|MOB1A_HUMAN MOB kinase activator 1A OS=Homo sapiens OX=9606 GN=MOB1A PE=1 SV=4;sp|Q7L9L4|MOB1B_HUMAN MOB kinase activator 1B OS=Homo sapiens OX=9606 GN=MOB1B PE=1 SV=3	2	5	5	5	22.7	25.079	3438300	537320	6.39898
P46379	Large proline-rich protein BAG6	BAG6	FUNCTION: ATP-independent molecular chaperone preventing the aggregation of misfolded and hydrophobic patches-containing proteins (PubMed:21636303). Functions as part of a cytosolic protein quality control complex, the BAG6/BAT3 complex, which maintains these client proteins in a soluble state and participates in their proper delivery to the endoplasmic reticulum or alternatively can promote thei…	sp|P46379|BAG6_HUMAN	sp|P46379|BAG6_HUMAN Large proline-rich protein BAG6 OS=Homo sapiens OX=9606 GN=BAG6 PE=1 SV=2	1	20	20	20	27.5	119.41	6502200	1029100	6.31834
Q9UHI6	Probable ATP-dependent RNA helicase DDX20	DDX20	FUNCTION: The SMN complex plays a catalyst role in the assembly of small nuclear ribonucleoproteins (snRNPs), the building blocks of the spliceosome. Thereby, plays an important role in the splicing of cellular pre-mRNAs. Most spliceosomal snRNPs contain a common set of Sm proteins SNRPB, SNRPD1, SNRPD2, SNRPD3, SNRPE, SNRPF and SNRPG that assemble in a heptameric protein ring on the Sm site of t…	sp|Q9UHI6|DDX20_HUMAN	sp|Q9UHI6|DDX20_HUMAN Probable ATP-dependent RNA helicase DDX20 OS=Homo sapiens OX=9606 GN=DDX20 PE=1 SV=2	1	13	13	13	22.9	92.239	2161800	342310	6.31533
O95249	Golgi SNAP receptor complex member 1	GOSR1	FUNCTION: Involved in transport from the ER to the Golgi apparatus as well as in intra-Golgi transport. It belongs to a super-family of proteins called t-SNAREs or soluble NSF (N-ethylmaleimide-sensitive factor) attachment protein receptor. May play a protective role against hydrogen peroxide induced cytotoxicity under glutathione depleted conditions in neuronal cells by regulating the intracellu…	sp|O95249|GOSR1_HUMAN	sp|O95249|GOSR1_HUMAN Golgi SNAP receptor complex member 1 OS=Homo sapiens OX=9606 GN=GOSR1 PE=1 SV=1	1	8	8	8	36.4	28.612	2297400	365320	6.28873
Q14149	MORC family CW-type zinc finger protein 3	MORC3	FUNCTION: Nuclear factor which forms MORC3-NBs (nuclear bodies) via an ATP-dependent mechanism (PubMed:20501696). Sumoylated MORC3-NBs can also associate with PML-NBs (PubMed:20501696). Recruits TP53 and SP100 to PML-NBs, thus regulating TP53 activity (PubMed:17332504). Binds RNA in vitro (PubMed:11927593). May be required for influenza A transcription during viral infection (PubMed:26202233). {E…	sp|Q14149|MORC3_HUMAN	sp|Q14149|MORC3_HUMAN MORC family CW-type zinc finger protein 3 OS=Homo sapiens OX=9606 GN=MORC3 PE=1 SV=3	1	9	9	9	13.5	107.11	180510	28933	6.2389
Q9Y3A3	MOB-like protein phocein	MOB4	FUNCTION: May play a role in membrane trafficking, specifically in membrane budding reactions. {ECO:0000250}.	sp|Q9Y3A3|PHOCN_HUMAN	sp|Q9Y3A3|PHOCN_HUMAN MOB-like protein phocein OS=Homo sapiens OX=9606 GN=MOB4 PE=1 SV=1	1	5	5	5	35.6	26.032	3043800	488180	6.235
P61009	Signal peptidase complex subunit 3	SPCS3	FUNCTION: Component of the microsomal signal peptidase complex which removes signal peptides and other N-terminal peptides from nascent proteins as they are translocated into the lumen of the endoplasmic reticulum. {ECO:0000269|PubMed:27499293}.; FUNCTION: (Microbial infection) Plays an important role in virion production of flaviviruses such as West Nile virus, Japanese enchephalitis virus, Deng…	sp|P61009|SPCS3_HUMAN	sp|P61009|SPCS3_HUMAN Signal peptidase complex subunit 3 OS=Homo sapiens OX=9606 GN=SPCS3 PE=1 SV=1	1	3	3	3	20	20.313	1286300	206790	6.22032
P11216	Glycogen phosphorylase, brain form	PYGB	FUNCTION: Glycogen phosphorylase that regulates glycogen mobilization (PubMed:27402852). Phosphorylase is an important allosteric enzyme in carbohydrate metabolism (PubMed:3346228). Enzymes from different sources differ in their regulatory mechanisms and in their natural substrates (PubMed:3346228). However, all known phosphorylases share catalytic and structural properties (PubMed:3346228). {ECO…	sp|P11216|PYGB_HUMAN	sp|P11216|PYGB_HUMAN Glycogen phosphorylase, brain form OS=Homo sapiens OX=9606 GN=PYGB PE=1 SV=5	1	28	28	24	42.3	96.695	8170400	1328300	6.15102
Q8WZ74	Cortactin-binding protein 2	CTTNBP2	FUNCTION: Regulates the dendritic spine distribution of CTTN/cortactin in hippocampal neurons, thus controls dendritic spinogenesis and dendritic spine maintenance. {ECO:0000250}.	sp|Q8WZ74|CTTB2_HUMAN	sp|Q8WZ74|CTTB2_HUMAN Cortactin-binding protein 2 OS=Homo sapiens OX=9606 GN=CTTNBP2 PE=1 SV=1	1	1	1	1	0.8	181.05	33870	5526.9	6.12821
Q15291	Retinoblastoma-binding protein 5	RBBP5	FUNCTION: In embryonic stem (ES) cells, plays a crucial role in the differentiation potential, particularly along the neural lineage, regulating gene induction and H3 'Lys-4' methylation at key developmental loci, including that mediated by retinoic acid (By similarity). Does not affect ES cell self-renewal (By similarity). Component or associated component of some histone methyltransferase compl…	sp|Q15291|RBBP5_HUMAN	sp|Q15291|RBBP5_HUMAN Retinoblastoma-binding protein 5 OS=Homo sapiens OX=9606 GN=RBBP5 PE=1 SV=2	1	3	3	3	8.2	59.152	659420	108360	6.08546
Q07889	Son of sevenless homolog 1	SOS1	FUNCTION: Promotes the exchange of Ras-bound GDP by GTP (PubMed:8493579). Probably by promoting Ras activation, regulates phosphorylation of MAP kinase MAPK3 in response to EGF (PubMed:17339331). Catalytic component of a trimeric complex that participates in transduction of signals from Ras to Rac by promoting the Rac-specific guanine nucleotide exchange factor (GEF) activity (By similarity). {EC…	sp|Q07889|SOS1_HUMAN	sp|Q07889|SOS1_HUMAN Son of sevenless homolog 1 OS=Homo sapiens OX=9606 GN=SOS1 PE=1 SV=1	1	1	1	1	1.1	152.46	198950	32749	6.07499
Q96KB5	Lymphokine-activated killer T-cell-originated protein kinase	PBK	FUNCTION: Phosphorylates MAP kinase p38. Seems to be active only in mitosis. May also play a role in the activation of lymphoid cells. When phosphorylated, forms a complex with TP53, leading to TP53 destabilization and attenuation of G2/M checkpoint during doxorubicin-induced DNA damage. {ECO:0000269|PubMed:10781613, ECO:0000269|PubMed:17482142}.	sp|Q96KB5|TOPK_HUMAN	sp|Q96KB5|TOPK_HUMAN Lymphokine-activated killer T-cell-originated protein kinase OS=Homo sapiens OX=9606 GN=PBK PE=1 SV=3	1	10	10	10	46.3	36.085	3301000	549870	6.00324
Q9H7N4	Splicing factor, arginine/serine-rich 19	SCAF1	FUNCTION: May function in pre-mRNA splicing. {ECO:0000250}.	sp|Q9H7N4|SFR19_HUMAN	sp|Q9H7N4|SFR19_HUMAN Splicing factor, arginine/serine-rich 19 OS=Homo sapiens OX=9606 GN=SCAF1 PE=1 SV=3	1	2	2	2	2.4	139.27	20232	3378.6	5.98828
O15091	Mitochondrial ribonuclease P catalytic subunit	PRORP	FUNCTION: Catalytic ribonuclease component of mitochondrial ribonuclease P, a complex composed of TRMT10C/MRPP1, HSD17B10/MRPP2 and PRORP/MRPP3, which cleaves tRNA molecules in their 5'-ends (PubMed:18984158, PubMed:25953853). The presence of TRMT10C/MRPP1, HSD17B10/MRPP2 is required to catalyze tRNA molecules in their 5'-ends (PubMed:25953853). {ECO:0000269|PubMed:18984158, ECO:0000269|PubMed:25…	sp|O15091|MRPP3_HUMAN	sp|O15091|MRPP3_HUMAN Mitochondrial ribonuclease P catalytic subunit OS=Homo sapiens OX=9606 GN=PRORP PE=1 SV=2	1	6	6	6	18.2	67.315	840140	140840	5.96521
Q9HD15	Steroid receptor RNA activator 1	SRA1	FUNCTION: Functional RNA which acts as a transcriptional coactivator that selectively enhances steroid receptor-mediated transactivation ligand-independently through a mechanism involving the modulating N-terminal domain (AF-1) of steroid receptors. Also mediates transcriptional coactivation of steroid receptors ligand-dependently through the steroid-binding domain (AF-2). Enhances cellular proli…	sp|Q9HD15|SRA1_HUMAN	sp|Q9HD15|SRA1_HUMAN Steroid receptor RNA activator 1 OS=Homo sapiens OX=9606 GN=SRA1 PE=1 SV=2	1	4	4	4	31.7	24.399	1009500	169450	5.95751
Q6P582	Mitotic-spindle organizing protein 2A	MZT2A		sp|Q6P582|MZT2A_HUMAN;sp|Q6NZ67|MZT2B_HUMAN	sp|Q6P582|MZT2A_HUMAN Mitotic-spindle organizing protein 2A OS=Homo sapiens OX=9606 GN=MZT2A PE=1 SV=2;sp|Q6NZ67|MZT2B_HUMAN Mitotic-spindle organizing protein 2B OS=Homo sapiens OX=9606 GN=MZT2B PE=1 SV=1	2	3	3	3	31.6	16.22	225550	38009	5.93412
O14777	Kinetochore protein NDC80 homolog	NDC80	FUNCTION: Acts as a component of the essential kinetochore-associated NDC80 complex, which is required for chromosome segregation and spindle checkpoint activity (PubMed:9315664, PubMed:12351790, PubMed:14654001, PubMed:14699129, PubMed:15062103, PubMed:15235793, PubMed:15239953, PubMed:15548592, PubMed:16732327). Required for kinetochore integrity and the organization of stable microtubule bindi…	sp|O14777|NDC80_HUMAN	sp|O14777|NDC80_HUMAN Kinetochore protein NDC80 homolog OS=Homo sapiens OX=9606 GN=NDC80 PE=1 SV=1	1	11	11	11	15.7	73.912	1255700	212030	5.92228
Q9BRA0	N-alpha-acetyltransferase 38, NatC auxiliary subunit	NAA38	FUNCTION: Auxillary component of the N-terminal acetyltransferase C (NatC) complex which catalyzes acetylation of N-terminal methionine residues. {ECO:0000269|PubMed:19398576}.	sp|Q9BRA0|LSMD1_HUMAN	sp|Q9BRA0|LSMD1_HUMAN N-alpha-acetyltransferase 38, NatC auxiliary subunit OS=Homo sapiens OX=9606 GN=NAA38 PE=1 SV=1	1	2	2	2	28.8	13.514	96129	16269	5.90872
Q99614	Tetratricopeptide repeat protein 1	TTC1		sp|Q99614|TTC1_HUMAN	sp|Q99614|TTC1_HUMAN Tetratricopeptide repeat protein 1 OS=Homo sapiens OX=9606 GN=TTC1 PE=1 SV=1	1	7	7	7	27.1	33.526	1618600	277690	5.8288
Q96BW1	Uracil phosphoribosyltransferase homolog	UPRT		sp|Q96BW1|UPP_HUMAN	sp|Q96BW1|UPP_HUMAN Uracil phosphoribosyltransferase homolog OS=Homo sapiens OX=9606 GN=UPRT PE=1 SV=1	1	1	1	1	4.2	33.786	200310	34478	5.80979
A5YKK6	CCR4-NOT transcription complex subunit 1	CNOT1	FUNCTION: Scaffolding component of the CCR4-NOT complex which is one of the major cellular mRNA deadenylases and is linked to various cellular processes including bulk mRNA degradation, miRNA-mediated repression, translational repression during translational initiation and general transcription regulation. Additional complex functions may be a consequence of its influence on mRNA expression. Its …	sp|A5YKK6|CNOT1_HUMAN	sp|A5YKK6|CNOT1_HUMAN CCR4-NOT transcription complex subunit 1 OS=Homo sapiens OX=9606 GN=CNOT1 PE=1 SV=2	1	41	41	41	22.9	266.94	302897	52302	5.79131
Q8IWT0	Protein archease	ZBTB8OS	FUNCTION: Component of the tRNA-splicing ligase complex required to facilitate the enzymatic turnover of catalytic subunit RTCB. Together with DDX1, acts by facilitating the guanylylation of RTCB, a key intermediate step in tRNA ligation. {ECO:0000269|PubMed:24870230}.	sp|Q8IWT0|ARCH_HUMAN	sp|Q8IWT0|ARCH_HUMAN Protein archease OS=Homo sapiens OX=9606 GN=ZBTB8OS PE=1 SV=2	1	1	1	1	6	19.491	198990	34378	5.78829
P11274	Breakpoint cluster region protein	BCR	FUNCTION: Protein with a unique structure having two opposing regulatory activities toward small GTP-binding proteins. The C-terminus is a GTPase-activating protein (GAP) domain which stimulates GTP hydrolysis by RAC1, RAC2 and CDC42. Accelerates the intrinsic rate of GTP hydrolysis of RAC1 or CDC42, leading to down-regulation of the active GTP-bound form (PubMed:7479768, PubMed:1903516, PubMed:1…	sp|P11274|BCR_HUMAN	sp|P11274|BCR_HUMAN Breakpoint cluster region protein OS=Homo sapiens OX=9606 GN=BCR PE=1 SV=2	1	3	2	2	3.2	142.82	334800	57957	5.7767
Q8WUF5	RelA-associated inhibitor	PPP1R13L	FUNCTION: Regulator that plays a central role in regulation of apoptosis and transcription via its interaction with NF-kappa-B and p53/TP53 proteins. Blocks transcription of HIV-1 virus by inhibiting the action of both NF-kappa-B and SP1. Also inhibits p53/TP53 function, possibly by preventing the association between p53/TP53 and ASPP1 or ASPP2, and therefore suppressing the subsequent activation…	sp|Q8WUF5|IASPP_HUMAN	sp|Q8WUF5|IASPP_HUMAN RelA-associated inhibitor OS=Homo sapiens OX=9606 GN=PPP1R13L PE=1 SV=4	1	2	2	2	3.7	89.09	85317	14898	5.72674
Q8NCG7	Diacylglycerol lipase-beta	DAGLB	FUNCTION: Lipase that catalyzes the hydrolysis of arachidonic acid (AA)-esterified diacylglycerols (DAGs) to produce the principal endocannabinoid, 2-arachidonoylglycerol (2-AG) which can be further cleaved by downstream enzymes to release arachidonic acid (AA) for cyclooxygenase (COX)-mediated eicosanoid production (PubMed:14610053). Preferentially hydrolyzes DAGs at the sn-1 position in a calci…	sp|Q8NCG7|DGLB_HUMAN	sp|Q8NCG7|DGLB_HUMAN Diacylglycerol lipase-beta OS=Homo sapiens OX=9606 GN=DAGLB PE=1 SV=2	1	7	7	7	13.4	73.731	638690	111550	5.72559
P30414	NK-tumor recognition protein	NKTR	FUNCTION: PPIase that catalyzes the cis-trans isomerization of proline imidic peptide bonds in oligopeptides and may therefore assist protein folding (PubMed:20676357). Component of a putative tumor-recognition complex involved in the function of NK cells (PubMed:8421688). {ECO:0000269|PubMed:20676357, ECO:0000269|PubMed:8421688}.	sp|P30414|NKTR_HUMAN	sp|P30414|NKTR_HUMAN NK-tumor recognition protein OS=Homo sapiens OX=9606 GN=NKTR PE=1 SV=2	1	2	2	2	2.1	165.67	16529	2929.4	5.64245
O14744	Protein arginine N-methyltransferase 5	PRMT5	FUNCTION: Arginine methyltransferase that can both catalyze the formation of omega-N monomethylarginine (MMA) and symmetrical dimethylarginine (sDMA), with a preference for the formation of MMA (PubMed:10531356, PubMed:11152681, PubMed:11747828, PubMed:12411503, PubMed:15737618, PubMed:17709427, PubMed:20159986, PubMed:20810653, PubMed:21258366, PubMed:21917714, PubMed:22269951, PubMed:21081503).…	sp|O14744|ANM5_HUMAN	sp|O14744|ANM5_HUMAN Protein arginine N-methyltransferase 5 OS=Homo sapiens OX=9606 GN=PRMT5 PE=1 SV=4	1	18	18	18	43.2	72.683	7645000	1355300	5.64082
Q96A26	Protein FAM162A	FAM162A	FUNCTION: Proposed to be involved in regulation of apoptosis; the exact mechanism may differ between cell types/tissues. May be involved in hypoxia-induced cell death of transformed cells implicating cytochrome C release and caspase activation (such as CASP9) and inducing mitochondrial permeability transition. May be involved in hypoxia-induced cell death of neuronal cells probably by promoting r…	sp|Q96A26|F162A_HUMAN	sp|Q96A26|F162A_HUMAN Protein FAM162A OS=Homo sapiens OX=9606 GN=FAM162A PE=1 SV=2	1	5	5	5	27.3	17.342	3318500	588550	5.63843
O75818	Ribonuclease P protein subunit p40	RPP40	FUNCTION: Component of ribonuclease P, a ribonucleoprotein complex that generates mature tRNA molecules by cleaving their 5'-ends (PubMed:9630247, PubMed:30454648). Also a component of the MRP ribonuclease complex, which cleaves pre-rRNA sequences (PubMed:28115465). {ECO:0000269|PubMed:28115465, ECO:0000269|PubMed:30454648, ECO:0000269|PubMed:9630247}.	sp|O75818|RPP40_HUMAN	sp|O75818|RPP40_HUMAN Ribonuclease P protein subunit p40 OS=Homo sapiens OX=9606 GN=RPP40 PE=1 SV=3	1	4	4	4	18.2	41.833	250270	44787	5.58801
O60645	Exocyst complex component 3	EXOC3	FUNCTION: Component of the exocyst complex involved in the docking of exocytic vesicles with fusion sites on the plasma membrane.	sp|O60645|EXOC3_HUMAN	sp|O60645|EXOC3_HUMAN Exocyst complex component 3 OS=Homo sapiens OX=9606 GN=EXOC3 PE=1 SV=3	1	7	7	7	11.1	85.566	791790	142010	5.57559
P50443	Sulfate transporter	SLC26A2	FUNCTION: Sulfate transporter. May play a role in endochondral bone formation. {ECO:0000269|PubMed:7923357}.	sp|P50443|S26A2_HUMAN	sp|P50443|S26A2_HUMAN Sulfate transporter OS=Homo sapiens OX=9606 GN=SLC26A2 PE=1 SV=2	1	2	2	2	2.6	81.661	179830	32525	5.52898
Q96BJ3	Axin interactor, dorsalization-associated protein	AIDA	FUNCTION: Acts as a ventralizing factor during embryogenesis. Inhibits axin-mediated JNK activation by binding axin and disrupting axin homodimerization. This in turn antagonizes a Wnt/beta-catenin-independent dorsalization pathway activated by AXIN/JNK-signaling (By similarity). {ECO:0000250}.	sp|Q96BJ3|AIDA_HUMAN	sp|Q96BJ3|AIDA_HUMAN Axin interactor, dorsalization-associated protein OS=Homo sapiens OX=9606 GN=AIDA PE=1 SV=1	1	8	8	8	29.1	35.023	1177500	216740	5.43278
Q9C0C4	Semaphorin-4C	SEMA4C	FUNCTION: Cell surface receptor for PLXNB2 that plays an important role in cell-cell signaling. PLXNB2 binding promotes downstream activation of RHOA and phosphorylation of ERBB2 at 'Tyr-1248'. Required for normal brain development, axon guidance and cell migration (By similarity). Probable signaling receptor which may play a role in myogenic differentiation through activation of the stress-activ…	sp|Q9C0C4|SEM4C_HUMAN	sp|Q9C0C4|SEM4C_HUMAN Semaphorin-4C OS=Homo sapiens OX=9606 GN=SEMA4C PE=1 SV=2	1	3	3	3	5.3	92.622	154130	28421	5.4231
Q96QD8	Sodium-coupled neutral amino acid symporter 2	SLC38A2	FUNCTION: Functions as a sodium-dependent amino acid transporter. Mediates the saturable, pH-sensitive and electrogenic cotransport of neutral amino acids and sodium ions with a stoichiometry of 1:1. May function in the transport of amino acids at the blood-brain barrier and in the supply of maternal nutrients to the fetus through the placenta. {ECO:0000269|PubMed:10930503, ECO:0000269|PubMed:159…	sp|Q96QD8|S38A2_HUMAN	sp|Q96QD8|S38A2_HUMAN Sodium-coupled neutral amino acid symporter 2 OS=Homo sapiens OX=9606 GN=SLC38A2 PE=1 SV=2	1	2	2	2	5.3	56.025	1398800	258460	5.41206
P82675	28S ribosomal protein S5, mitochondrial	MRPS5		sp|P82675|RT05_HUMAN	sp|P82675|RT05_HUMAN 28S ribosomal protein S5, mitochondrial OS=Homo sapiens OX=9606 GN=MRPS5 PE=1 SV=2	1	8	8	8	25.6	48.006	3110800	579000	5.37271
Q06136	3-ketodihydrosphingosine reductase	KDSR	FUNCTION: Catalyzes the reduction of 3-ketodihydrosphingosine (KDS) to dihydrosphingosine (DHS). {ECO:0000269|PubMed:28575652}.	sp|Q06136|KDSR_HUMAN	sp|Q06136|KDSR_HUMAN 3-ketodihydrosphingosine reductase OS=Homo sapiens OX=9606 GN=KDSR PE=1 SV=1	1	5	5	5	22.9	36.187	1280100	241260	5.30589
Q96J01	THO complex subunit 3	THOC3	FUNCTION: Required for efficient export of polyadenylated RNA and spliced mRNA. Acts as component of the THO subcomplex of the TREX complex which is thought to couple mRNA transcription, processing and nuclear export, and which specifically associates with spliced mRNA and not with unspliced pre-mRNA. TREX is recruited to spliced mRNAs by a transcription-independent mechanism, binds to mRNA upstr…	sp|Q96J01|THOC3_HUMAN	sp|Q96J01|THOC3_HUMAN THO complex subunit 3 OS=Homo sapiens OX=9606 GN=THOC3 PE=1 SV=1	1	7	7	7	39.6	38.771	1978500	375080	5.27487
Q8TF71	Monocarboxylate transporter 10	SLC16A10	FUNCTION: Sodium-independent transporter that mediates the uptake of aromatic acids. Can function as a net efflux pathway for aromatic amino acids in the basosolateral epithelial cells (By similarity). {ECO:0000250, ECO:0000269|PubMed:11827462}.	sp|Q8TF71|MOT10_HUMAN	sp|Q8TF71|MOT10_HUMAN Monocarboxylate transporter 10 OS=Homo sapiens OX=9606 GN=SLC16A10 PE=1 SV=1	1	4	4	4	14.6	55.492	2141300	409120	5.23392
Q13627	Dual specificity tyrosine-phosphorylation-regulated kinase 1A	DYRK1A	FUNCTION: Dual-specificity kinase which possesses both serine/threonine and tyrosine kinase activities. May play a role in a signaling pathway regulating nuclear functions of cell proliferation. Modulates alternative splicing by phosphorylating the splice factor SRSF6 (By similarity). Exhibits a substrate preference for proline at position P+1 and arginine at position P-3. Has pro-survival functi…	sp|Q13627|DYR1A_HUMAN;sp|Q9Y463|DYR1B_HUMAN	sp|Q13627|DYR1A_HUMAN Dual specificity tyrosine-phosphorylation-regulated kinase 1A OS=Homo sapiens OX=9606 GN=DYRK1A PE=1 SV=2	2	6	6	6	12.1	85.583	478900	91625	5.22674
Q9NZ08	Endoplasmic reticulum aminopeptidase 1	ERAP1	FUNCTION: Aminopeptidase that plays a central role in peptide trimming, a step required for the generation of most HLA class I-binding peptides. Peptide trimming is essential to customize longer precursor peptides to fit them to the correct length required for presentation on MHC class I molecules. Strongly prefers substrates 9-16 residues long. Rapidly degrades 13-mer to a 9-mer and then stops. …	sp|Q9NZ08|ERAP1_HUMAN	sp|Q9NZ08|ERAP1_HUMAN Endoplasmic reticulum aminopeptidase 1 OS=Homo sapiens OX=9606 GN=ERAP1 PE=1 SV=3	1	11	11	11	15.2	107.23	1396800	268500	5.20223
Q96ME7	Zinc finger protein 512	ZNF512	FUNCTION: May be involved in transcriptional regulation.	sp|Q96ME7|ZN512_HUMAN	sp|Q96ME7|ZN512_HUMAN Zinc finger protein 512 OS=Homo sapiens OX=9606 GN=ZNF512 PE=1 SV=2	1	2	2	2	6.2	64.681	76856	14775	5.20176
P48163	NADP-dependent malic enzyme	ME1		sp|P48163|MAOX_HUMAN	sp|P48163|MAOX_HUMAN NADP-dependent malic enzyme OS=Homo sapiens OX=9606 GN=ME1 PE=1 SV=1	1	10	10	10	24.8	64.149	2019800	391380	5.16071
Q8N543	Prolyl 3-hydroxylase OGFOD1	OGFOD1	FUNCTION: Prolyl 3-hydroxylase that catalyzes 3-hydroxylation of 'Pro-62' of small ribosomal subunit uS12 (RPS23), thereby regulating protein translation termination efficiency. Involved in stress granule formation. {ECO:0000269|PubMed:20154146, ECO:0000269|PubMed:24550447, ECO:0000269|PubMed:24550462}.	sp|Q8N543|OGFD1_HUMAN	sp|Q8N543|OGFD1_HUMAN Prolyl 3-hydroxylase OGFOD1 OS=Homo sapiens OX=9606 GN=OGFOD1 PE=1 SV=1	1	11	11	11	26.8	63.245	1637900	320050	5.11764
Q8IZP0	Abl interactor 1	ABI1	FUNCTION: May act in negative regulation of cell growth and transformation by interacting with nonreceptor tyrosine kinases ABL1 and/or ABL2. May play a role in regulation of EGF-induced Erk pathway activation. Involved in cytoskeletal reorganization and EGFR signaling. Together with EPS8 participates in transduction of signals from Ras to Rac. In vitro, a trimeric complex of ABI1, EPS8 and SOS1 …	sp|Q8IZP0|ABI1_HUMAN	sp|Q8IZP0|ABI1_HUMAN Abl interactor 1 OS=Homo sapiens OX=9606 GN=ABI1 PE=1 SV=4	1	9	9	7	17.3	55.08	2031900	397240	5.11504
Q9GZY8	Mitochondrial fission factor	MFF	FUNCTION: Plays a role in mitochondrial and peroxisomal fission. Promotes the recruitment and association of the fission mediator dynamin-related protein 1 (DNM1L) to the mitochondrial surface. May be involved in regulation of synaptic vesicle membrane dynamics by recruitment of DNM1L to clathrin-containing vesicles. {ECO:0000269|PubMed:18353969, ECO:0000269|PubMed:23530241}.	sp|Q9GZY8|MFF_HUMAN	sp|Q9GZY8|MFF_HUMAN Mitochondrial fission factor OS=Homo sapiens OX=9606 GN=MFF PE=1 SV=1	1	10	10	10	43	38.464	1382800	276320	5.00434
P33316	Deoxyuridine 5-triphosphate nucleotidohydrolase, mitochondrial	DUT	FUNCTION: This enzyme is involved in nucleotide metabolism: it produces dUMP, the immediate precursor of thymidine nucleotides and it decreases the intracellular concentration of dUTP so that uracil cannot be incorporated into DNA. {ECO:0000269|PubMed:17880943, ECO:0000269|PubMed:8631816, ECO:0000269|PubMed:8805593}.	sp|P33316|DUT_HUMAN	sp|P33316|DUT_HUMAN Deoxyuridine 5-triphosphate nucleotidohydrolase, mitochondrial OS=Homo sapiens OX=9606 GN=DUT PE=1 SV=4	1	10	10	10	44.4	26.563	7513800	1503300	4.9982
Q15437	Protein transport protein Sec23B	SEC23B	FUNCTION: Component of the coat protein complex II (COPII) which promotes the formation of transport vesicles from the endoplasmic reticulum (ER). The coat has two main functions, the physical deformation of the endoplasmic reticulum membrane into vesicles and the selection of cargo molecules for their transport to the Golgi complex. {ECO:0000250|UniProtKB:Q15436}.	sp|Q15437|SC23B_HUMAN	sp|Q15437|SC23B_HUMAN Protein transport protein Sec23B OS=Homo sapiens OX=9606 GN=SEC23B PE=1 SV=2	1	15	13	13	28.4	86.478	3063100	614090	4.98803
Q9Y606	Pseudouridylate synthase 1 homolog	PUS1	FUNCTION: Converts specific uridines to PSI in a number of tRNA substrates. Acts on positions 27/28 in the anticodon stem and also positions 34 and 36 in the anticodon of an intron containing tRNA. Involved in regulation of nuclear receptor activity through pseudouridylation of SRA1 RNA. {ECO:0000269|PubMed:24722331}.	sp|Q9Y606|PUS1_HUMAN	sp|Q9Y606|PUS1_HUMAN Pseudouridylate synthase 1 homolog OS=Homo sapiens OX=9606 GN=PUS1 PE=1 SV=3	1	11	11	11	30.2	47.47	1866600	374590	4.98305
P06213	Insulin receptor	INSR	FUNCTION: Receptor tyrosine kinase which mediates the pleiotropic actions of insulin. Binding of insulin leads to phosphorylation of several intracellular substrates, including, insulin receptor substrates (IRS1, 2, 3, 4), SHC, GAB1, CBL and other signaling intermediates. Each of these phosphorylated proteins serve as docking proteins for other signaling proteins that contain Src-homology-2 domai…	sp|P06213|INSR_HUMAN	sp|P06213|INSR_HUMAN Insulin receptor OS=Homo sapiens OX=9606 GN=INSR PE=1 SV=4	1	9	9	9	8.5	156.33	1608900	326470	4.92817
Q15018	BRISC complex subunit Abraxas 2	ABRAXAS2	FUNCTION: Component of the BRISC complex, a multiprotein complex that specifically cleaves 'Lys-63'-linked polyubiquitin, leaving the last ubiquitin chain attached to its substrates (PubMed:19214193, PubMed:20032457, PubMed:20656690, PubMed:24075985). May act as a central scaffold protein that assembles the various components of the BRISC complex and retains them in the cytoplasm (PubMed:20656690…	sp|Q15018|ABRX2_HUMAN	sp|Q15018|ABRX2_HUMAN BRISC complex subunit Abraxas 2 OS=Homo sapiens OX=9606 GN=ABRAXAS2 PE=1 SV=2	1	6	6	6	19.5	46.9	937110	190290	4.92464
Q86US8	Telomerase-binding protein EST1A	SMG6	FUNCTION: Component of the telomerase ribonucleoprotein (RNP) complex that is essential for the replication of chromosome termini (PubMed:19179534). May have a general role in telomere regulation (PubMed:12676087, PubMed:12699629). Promotes in vitro the ability of TERT to elongate telomeres (PubMed:12676087, PubMed:12699629). Overexpression induces telomere uncapping, chromosomal end-to-end fusio…	sp|Q86US8|EST1A_HUMAN	sp|Q86US8|EST1A_HUMAN Telomerase-binding protein EST1A OS=Homo sapiens OX=9606 GN=SMG6 PE=1 SV=2	1	5	5	5	4.2	160.46	52864	10744	4.92033
Q16851	UTP--glucose-1-phosphate uridylyltransferase	UGP2	FUNCTION: Plays a central role as a glucosyl donor in cellular metabolic pathways.	sp|Q16851|UGPA_HUMAN	sp|Q16851|UGPA_HUMAN UTP--glucose-1-phosphate uridylyltransferase OS=Homo sapiens OX=9606 GN=UGP2 PE=1 SV=5	1	9	9	9	23.8	56.94	2482200	504680	4.91836
P50225	Sulfotransferase 1A1	SULT1A1	FUNCTION: Sulfotransferase that utilizes 3'-phospho-5'-adenylyl sulfate (PAPS) as sulfonate donor to catalyze the sulfate conjugation of catecholamines, phenolic drugs and neurotransmitters. Has also estrogen sulfotransferase activity. responsible for the sulfonation and activation of minoxidil. Is Mediates the metabolic activation of carcinogenic N-hydroxyarylamines to DNA binding products and c…	sp|P50225|ST1A1_HUMAN;sp|P50226|ST1A2_HUMAN;sp|P0DMN0|ST1A4_HUMAN;sp|P0DMM9|ST1A3_HUMAN	sp|P50225|ST1A1_HUMAN Sulfotransferase 1A1 OS=Homo sapiens OX=9606 GN=SULT1A1 PE=1 SV=3;sp|P50226|ST1A2_HUMAN Sulfotransferase 1A2 OS=Homo sapiens OX=9606 GN=SULT1A2 PE=1 SV=2;sp|P0DMN0|ST1A4_HUMAN Sulfotransferase 1A4 OS=Homo sapiens OX=9606 GN=SULT1A4 PE	4	11	11	11	41.7	34.165	12581000	2568500	4.89819
Q8IVF2	Protein AHNAK2	AHNAK2		sp|Q8IVF2|AHNK2_HUMAN	sp|Q8IVF2|AHNK2_HUMAN Protein AHNAK2 OS=Homo sapiens OX=9606 GN=AHNAK2 PE=1 SV=2	1	2	2	2	0.6	616.62	525830	107570	4.88826
O95363	Phenylalanine--tRNA ligase, mitochondrial	FARS2	FUNCTION: Is responsible for the charging of tRNA(Phe) with phenylalanine in mitochondrial translation. To a lesser extent, also catalyzes direct attachment of m-Tyr (an oxidized version of Phe) to tRNA(Phe), thereby opening the way for delivery of the misacylated tRNA to the ribosome and incorporation of ROS-damaged amino acid into proteins. {ECO:0000269|PubMed:19549855, ECO:0000269|PubMed:22833…	sp|O95363|SYFM_HUMAN	sp|O95363|SYFM_HUMAN Phenylalanine--tRNA ligase, mitochondrial OS=Homo sapiens OX=9606 GN=FARS2 PE=1 SV=1	1	6	6	6	14.4	52.356	977160	199940	4.88727
Q9Y5K6	CD2-associated protein	CD2AP	FUNCTION: Seems to act as an adapter protein between membrane proteins and the actin cytoskeleton (PubMed:10339567). In collaboration with CBLC, modulates the rate of RET turnover and may act as regulatory checkpoint that limits the potency of GDNF on neuronal survival. Controls CBLC function, converting it from an inhibitor to a promoter of RET degradation (By similarity). May play a role in rec…	sp|Q9Y5K6|CD2AP_HUMAN	sp|Q9Y5K6|CD2AP_HUMAN CD2-associated protein OS=Homo sapiens OX=9606 GN=CD2AP PE=1 SV=1	1	20	20	20	38.2	71.45	4961900	1019200	4.86843
O43670	BUB3-interacting and GLEBS motif-containing protein ZNF207	ZNF207	FUNCTION: Kinetochore- and microtubule-binding protein that plays a key role in spindle assembly (PubMed:24462186, PubMed:24462187, PubMed:26388440). ZNF207/BuGZ is mainly composed of disordered low-complexity regions and undergoes phase transition or coacervation to form temperature-dependent liquid droplets. Coacervation promotes microtubule bundling and concentrates tubulin, promoting microtub…	sp|O43670|ZN207_HUMAN	sp|O43670|ZN207_HUMAN BUB3-interacting and GLEBS motif-containing protein ZNF207 OS=Homo sapiens OX=9606 GN=ZNF207 PE=1 SV=1	1	4	4	4	10.3	50.75	1540700	316550	4.86716
O14545	TRAF-type zinc finger domain-containing protein 1	TRAFD1	FUNCTION: Negative feedback regulator that controls excessive innate immune responses. Regulates both Toll-like receptor 4 (TLR4) and DDX58/RIG1-like helicases (RLH) pathways. May inhibit the LTR pathway by direct interaction with TRAF6 and attenuation of NF-kappa-B activation. May negatively regulate the RLH pathway downstream from MAVS and upstream of NF-kappa-B and IRF3 (By similarity). {ECO:0…	sp|O14545|TRAD1_HUMAN	sp|O14545|TRAD1_HUMAN TRAF-type zinc finger domain-containing protein 1 OS=Homo sapiens OX=9606 GN=TRAFD1 PE=1 SV=1	1	6	6	6	13.6	64.84	576560	119880	4.80948
Q9Y2U5	Mitogen-activated protein kinase kinase kinase 2	MAP3K2	FUNCTION: Component of a protein kinase signal transduction cascade. Regulates the JNK and ERK5 pathways by phosphorylating and activating MAP2K5 and MAP2K7 (By similarity). Plays a role in caveolae kiss-and-run dynamics. {ECO:0000250, ECO:0000269|PubMed:10713157, ECO:0000269|PubMed:16001074}.	sp|Q9Y2U5|M3K2_HUMAN;sp|Q99759|M3K3_HUMAN	sp|Q9Y2U5|M3K2_HUMAN Mitogen-activated protein kinase kinase kinase 2 OS=Homo sapiens OX=9606 GN=MAP3K2 PE=1 SV=2;sp|Q99759|M3K3_HUMAN Mitogen-activated protein kinase kinase kinase 3 OS=Homo sapiens OX=9606 GN=MAP3K3 PE=1 SV=2	2	1	1	1	3.4	69.74	99544	20823	4.78048
P09496	Clathrin light chain A	CLTA	FUNCTION: Clathrin is the major protein of the polyhedral coat of coated pits and vesicles. Acts as component of the TACC3/ch-TOG/clathrin complex proposed to contribute to stabilization of kinetochore fibers of the mitotic spindle by acting as inter-microtubule bridge (PubMed:15858577, PubMed:21297582). {ECO:0000305|PubMed:15858577, ECO:0000305|PubMed:21297582}.	sp|P09496|CLCA_HUMAN	sp|P09496|CLCA_HUMAN Clathrin light chain A OS=Homo sapiens OX=9606 GN=CLTA PE=1 SV=1	1	5	5	5	13.7	27.076	824400	172590	4.77664
P40426	Pre-B-cell leukemia transcription factor 3	PBX3	FUNCTION: Transcriptional activator that binds the sequence 5'-ATCAATCAA-3'.	sp|P40426|PBX3_HUMAN	sp|P40426|PBX3_HUMAN Pre-B-cell leukemia transcription factor 3 OS=Homo sapiens OX=9606 GN=PBX3 PE=1 SV=1	1	1	1	1	2.5	47.189	276768	57948	4.77614
Q6XQN6	Nicotinate phosphoribosyltransferase	NAPRT	FUNCTION: Catalyzes the first step in the biosynthesis of NAD from nicotinic acid, the ATP-dependent synthesis of beta-nicotinate D-ribonucleotide from nicotinate and 5-phospho-D-ribose 1-phosphate (PubMed:17604275, PubMed:21742010, PubMed:26042198). Helps prevent cellular oxidative stress via its role in NAD biosynthesis (PubMed:17604275). {ECO:0000269|PubMed:17604275, ECO:0000269|PubMed:2174201…	sp|Q6XQN6|PNCB_HUMAN	sp|Q6XQN6|PNCB_HUMAN Nicotinate phosphoribosyltransferase OS=Homo sapiens OX=9606 GN=NAPRT PE=1 SV=2	1	4	4	4	16	57.578	638680	133870	4.7709
Q5VWZ2	Lysophospholipase-like protein 1	LYPLAL1	FUNCTION: Has depalmitoylating activity toward KCNMA1. Does not exhibit phospholipase nor triacylglycerol lipase activity, able to hydrolyze only short chain substrates due to its shallow active site. {ECO:0000269|PubMed:22052940, ECO:0000269|PubMed:22399288}.	sp|Q5VWZ2|LYPL1_HUMAN	sp|Q5VWZ2|LYPL1_HUMAN Lysophospholipase-like protein 1 OS=Homo sapiens OX=9606 GN=LYPLAL1 PE=1 SV=3	1	4	4	4	22.4	26.316	653900	137650	4.75045
Q9BYG5	Partitioning defective 6 homolog beta	PARD6B	FUNCTION: Adapter protein involved in asymmetrical cell division and cell polarization processes. Probably involved in formation of epithelial tight junctions. Association with PARD3 may prevent the interaction of PARD3 with F11R/JAM1, thereby preventing tight junction assembly. The PARD6-PARD3 complex links GTP-bound Rho small GTPases to atypical protein kinase C proteins.	sp|Q9BYG5|PAR6B_HUMAN	sp|Q9BYG5|PAR6B_HUMAN Partitioning defective 6 homolog beta OS=Homo sapiens OX=9606 GN=PARD6B PE=1 SV=1	1	1	1	1	3.5	41.182	39027	8228.8	4.74273
Q07864	DNA polymerase epsilon catalytic subunit A	POLE	FUNCTION: Catalytic component of the DNA polymerase epsilon complex (PubMed:10801849). Participates in chromosomal DNA replication (By similarity). Required during synthesis of the leading DNA strands at the replication fork, binds at/or near replication origins and moves along DNA with the replication fork (By similarity). Has 3'-5' proofreading exonuclease activity that corrects errors arising …	sp|Q07864|DPOE1_HUMAN	sp|Q07864|DPOE1_HUMAN DNA polymerase epsilon catalytic subunit A OS=Homo sapiens OX=9606 GN=POLE PE=1 SV=5	1	11	11	11	6.7	261.51	621260	131210	4.73485
Q96NT5	Proton-coupled folate transporter	SLC46A1	FUNCTION: Has been shown to act both as an intestinal proton-coupled high-affinity folate transporter and as an intestinal heme transporter which mediates heme uptake from the gut lumen into duodenal epithelial cells. The iron is then released from heme and may be transported into the bloodstream. Dietary heme iron is an important nutritional source of iron. Shows a higher affinity for folate tha…	sp|Q96NT5|PCFT_HUMAN	sp|Q96NT5|PCFT_HUMAN Proton-coupled folate transporter OS=Homo sapiens OX=9606 GN=SLC46A1 PE=1 SV=1	1	2	2	2	5.7	49.77	164030	34652	4.73364
O15498	Synaptobrevin homolog YKT6	YKT6	FUNCTION: Vesicular soluble NSF attachment protein receptor (v-SNARE) mediating vesicle docking and fusion to a specific acceptor cellular compartment. Functions in endoplasmic reticulum to Golgi transport; as part of a SNARE complex composed of GOSR1, GOSR2 and STX5. Functions in early/recycling endosome to TGN transport; as part of a SNARE complex composed of BET1L, GOSR1 and STX5. Has a S-palm…	sp|O15498|YKT6_HUMAN	sp|O15498|YKT6_HUMAN Synaptobrevin homolog YKT6 OS=Homo sapiens OX=9606 GN=YKT6 PE=1 SV=1	1	5	5	5	38.4	22.417	2344400	496240	4.72433
P50613	Cyclin-dependent kinase 7	CDK7	FUNCTION: Serine/threonine kinase involved in cell cycle control and in RNA polymerase II-mediated RNA transcription. Cyclin-dependent kinases (CDKs) are activated by the binding to a cyclin and mediate the progression through the cell cycle. Each different complex controls a specific transition between 2 subsequent phases in the cell cycle. Required for both activation and complex formation of C…	sp|P50613|CDK7_HUMAN	sp|P50613|CDK7_HUMAN Cyclin-dependent kinase 7 OS=Homo sapiens OX=9606 GN=CDK7 PE=1 SV=1	1	2	2	2	7.5	39.038	442500	93832	4.71588
O94992	Protein HEXIM1	HEXIM1	FUNCTION: Transcriptional regulator which functions as a general RNA polymerase II transcription inhibitor (PubMed:14580347, PubMed:15713661, PubMed:15201869). Core component of the 7SK RNP complex: in cooperation with 7SK snRNA sequesters P-TEFb in a large inactive 7SK snRNP complex preventing RNA polymerase II phosphorylation and subsequent transcriptional elongation (PubMed:12832472, PubMed:14…	sp|O94992|HEXI1_HUMAN	sp|O94992|HEXI1_HUMAN Protein HEXIM1 OS=Homo sapiens OX=9606 GN=HEXIM1 PE=1 SV=1	1	4	4	4	17	40.623	2395400	508390	4.71174
Q8NFH8	RalBP1-associated Eps domain-containing protein 2	REPS2	FUNCTION: Involved in growth factor signaling through its influence on the Ral signaling pathway.	sp|Q8NFH8|REPS2_HUMAN	sp|Q8NFH8|REPS2_HUMAN RalBP1-associated Eps domain-containing protein 2 OS=Homo sapiens OX=9606 GN=REPS2 PE=1 SV=2	1	3	3	3	5.8	71.533	637080	135420	4.70447
Q13443	Disintegrin and metalloproteinase domain-containing protein 9	ADAM9	FUNCTION: Cleaves and releases a number of molecules with important roles in tumorigenesis and angiogenesis, such as TEK, KDR, EPHB4, CD40, VCAM1 and CDH5. May mediate cell-cell, cell-matrix interactions and regulate the motility of cells via interactions with integrins. {ECO:0000250|UniProtKB:Q61072}.; FUNCTION: [Isoform 2]: May act as alpha-secretase for amyloid precursor protein (APP). {ECO:00…	sp|Q13443|ADAM9_HUMAN	sp|Q13443|ADAM9_HUMAN Disintegrin and metalloproteinase domain-containing protein 9 OS=Homo sapiens OX=9606 GN=ADAM9 PE=1 SV=1	1	12	12	12	20.3	90.555	1982700	423010	4.68712
O75116	Rho-associated protein kinase 2	ROCK2	FUNCTION: Protein kinase which is a key regulator of actin cytoskeleton and cell polarity. Involved in regulation of smooth muscle contraction, actin cytoskeleton organization, stress fiber and focal adhesion formation, neurite retraction, cell adhesion and motility via phosphorylation of ADD1, BRCA2, CNN1, EZR, DPYSL2, EP300, MSN, MYL9/MLC2, NPM1, RDX, PPP1R12A and VIM. Phosphorylates SORL1 and …	sp|O75116|ROCK2_HUMAN	sp|O75116|ROCK2_HUMAN Rho-associated protein kinase 2 OS=Homo sapiens OX=9606 GN=ROCK2 PE=1 SV=4	1	24	24	20	22.6	160.9	4796200	1026800	4.67102
Q96KN1	Protein LRATD2	LRATD2		sp|Q96KN1|LRAT2_HUMAN	sp|Q96KN1|LRAT2_HUMAN Protein LRATD2 OS=Homo sapiens OX=9606 GN=LRATD2 PE=1 SV=1	1	1	1	1	6.5	34.474	165390	35570	4.6497
P15121	Aldo-keto reductase family 1 member B1	AKR1B1	FUNCTION: Catalyzes the NADPH-dependent reduction of a wide variety of carbonyl-containing compounds to their corresponding alcohols. Displays enzymatic activity towards endogenous metabolites such as aromatic and aliphatic aldehydes, ketones, monosacharides, bile acids and xenobiotics substrates. Key enzyme in the polyol pathway, catalyzes reduction of glucose to sorbitol during hyperglycemia (P…	sp|P15121|ALDR_HUMAN;sp|C9JRZ8|AK1BF_HUMAN	sp|P15121|ALDR_HUMAN Aldo-keto reductase family 1 member B1 OS=Homo sapiens OX=9606 GN=AKR1B1 PE=1 SV=3	2	10	10	10	43.4	35.853	11076000	2406800	4.60196
Q9NR19	Acetyl-coenzyme A synthetase, cytoplasmic	ACSS2	FUNCTION: Catalyzes the synthesis of acetyl-CoA from short-chain fatty acids (PubMed:10843999, PubMed:28003429). Acetate is the preferred substrate (PubMed:10843999, PubMed:28003429). Can also utilize propionate with a much lower affinity (By similarity). {ECO:0000250|UniProtKB:Q9QXG4, ECO:0000269|PubMed:10843999, ECO:0000269|PubMed:28003429}.	sp|Q9NR19|ACSA_HUMAN	sp|Q9NR19|ACSA_HUMAN Acetyl-coenzyme A synthetase, cytoplasmic OS=Homo sapiens OX=9606 GN=ACSS2 PE=1 SV=1	1	5	5	5	11.6	78.579	335860	73370	4.57762
Q9Y289	Sodium-dependent multivitamin transporter	SLC5A6	FUNCTION: Transports pantothenate, biotin and lipoate in the presence of sodium.	sp|Q9Y289|SC5A6_HUMAN	sp|Q9Y289|SC5A6_HUMAN Sodium-dependent multivitamin transporter OS=Homo sapiens OX=9606 GN=SLC5A6 PE=1 SV=2	1	7	7	7	13.9	68.641	1241300	272240	4.55958
Q15904	V-type proton ATPase subunit S1	ATP6AP1	FUNCTION: Accessory subunit of the proton-transporting vacuolar (V)-ATPase protein pump, which is required for luminal acidification of secretory vesicles. Guides the V-type ATPase into specialized subcellular compartments, such as neuroendocrine regulated secretory vesicles or the ruffled border of the osteoclast, thereby regulating its activity. Involved in membrane trafficking and Ca(2+)-depen…	sp|Q15904|VAS1_HUMAN	sp|Q15904|VAS1_HUMAN V-type proton ATPase subunit S1 OS=Homo sapiens OX=9606 GN=ATP6AP1 PE=1 SV=2	1	4	4	4	8.9	52.025	1531500	337480	4.53805
Q9Y2V7	Conserved oligomeric Golgi complex subunit 6	COG6	FUNCTION: Required for normal Golgi function. {ECO:0000250}.	sp|Q9Y2V7|COG6_HUMAN	sp|Q9Y2V7|COG6_HUMAN Conserved oligomeric Golgi complex subunit 6 OS=Homo sapiens OX=9606 GN=COG6 PE=1 SV=2	1	5	5	5	11	73.278	578040	128080	4.51312
Q9P2T1	GMP reductase 2	GMPR2	FUNCTION: Catalyzes the irreversible NADPH-dependent deamination of GMP to IMP. It functions in the conversion of nucleobase, nucleoside and nucleotide derivatives of G to A nucleotides, and in maintaining the intracellular balance of A and G nucleotides (PubMed:12009299, PubMed:12669231, PubMed:16359702, PubMed:22037469). Plays a role in modulating cellular differentiation (PubMed:12669231). {EC…	sp|Q9P2T1|GMPR2_HUMAN	sp|Q9P2T1|GMPR2_HUMAN GMP reductase 2 OS=Homo sapiens OX=9606 GN=GMPR2 PE=1 SV=1	1	8	8	8	33.9	37.874	1805200	400180	4.51097
P54619	5-AMP-activated protein kinase subunit gamma-1	PRKAG1	FUNCTION: AMP/ATP-binding subunit of AMP-activated protein kinase (AMPK), an energy sensor protein kinase that plays a key role in regulating cellular energy metabolism. In response to reduction of intracellular ATP levels, AMPK activates energy-producing pathways and inhibits energy-consuming processes: inhibits protein, carbohydrate and lipid biosynthesis, as well as cell growth and proliferati…	sp|P54619|AAKG1_HUMAN;sp|Q9UGJ0|AAKG2_HUMAN	sp|P54619|AAKG1_HUMAN 5-AMP-activated protein kinase subunit gamma-1 OS=Homo sapiens OX=9606 GN=PRKAG1 PE=1 SV=1	2	10	10	10	34.1	37.579	1922400	426500	4.50739
Q15843	NEDD8	NEDD8	FUNCTION: Ubiquitin-like protein which plays an important role in cell cycle control and embryogenesis. Covalent attachment to its substrates requires prior activation by the E1 complex UBE1C-APPBP1 and linkage to the E2 enzyme UBE2M. Attachment of NEDD8 to cullins activates their associated E3 ubiquitin ligase activity, and thus promotes polyubiquitination and proteasomal degradation of cyclins …	sp|Q15843|NEDD8_HUMAN	sp|Q15843|NEDD8_HUMAN NEDD8 OS=Homo sapiens OX=9606 GN=NEDD8 PE=1 SV=1	1	2	2	2	28.4	9.0714	883920	196450	4.49947
Q14527	Helicase-like transcription factor	HLTF	FUNCTION: Has both helicase and E3 ubiquitin ligase activities. Possesses intrinsic ATP-dependent nucleosome-remodeling activity; This activity may be required for transcriptional activation or repression of specific target promoters (By similarity). These may include the SERPINE1 and HIV-1 promoters and the SV40 enhancer, to which this protein can bind directly. Plays a role in error-free postre…	sp|Q14527|HLTF_HUMAN	sp|Q14527|HLTF_HUMAN Helicase-like transcription factor OS=Homo sapiens OX=9606 GN=HLTF PE=1 SV=2	1	7	7	7	11.6	113.93	1816700	404060	4.49611
Q9NP73	Putative bifunctional UDP-N-acetylglucosamine transferase and deubiquitinase ALG13	ALG13	FUNCTION: [Isoform 1]: Possible multifunctional enzyme with both glycosyltransferase and deubiquitinase activities.; FUNCTION: [Isoform 2]: May be involved in protein N-glycosylation, second step of the dolichol-linked oligosaccharide pathway.	sp|Q9NP73|ALG13_HUMAN	sp|Q9NP73|ALG13_HUMAN Putative bifunctional UDP-N-acetylglucosamine transferase and deubiquitinase ALG13 OS=Homo sapiens OX=9606 GN=ALG13 PE=1 SV=2	1	4	4	4	4.9	126.05	151710	33831	4.48435
Q6P179	Endoplasmic reticulum aminopeptidase 2	ERAP2	FUNCTION: Aminopeptidase that plays a central role in peptide trimming, a step required for the generation of most HLA class I-binding peptides. Peptide trimming is essential to customize longer precursor peptides to fit them to the correct length required for presentation on MHC class I molecules. Preferentially hydrolyzes the basic residues Arg and Lys. {ECO:0000269|PubMed:12799365, ECO:0000269…	sp|Q6P179|ERAP2_HUMAN	sp|Q6P179|ERAP2_HUMAN Endoplasmic reticulum aminopeptidase 2 OS=Homo sapiens OX=9606 GN=ERAP2 PE=1 SV=2	1	9	9	9	13.5	110.46	597670	133650	4.4719
Q8NDH2	Leucine-rich repeat transmembrane protein CCDC168	CCDC168		sp|Q8NDH2|CC168_HUMAN	sp|Q8NDH2|CC168_HUMAN Leucine-rich repeat transmembrane protein CCDC168 OS=Homo sapiens OX=9606 GN=CCDC168 PE=2 SV=3	1	2	2	2	0.5	801.9	1895400	424620	4.46376
Q9GZT9	Egl nine homolog 1	EGLN1	FUNCTION: Cellular oxygen sensor that catalyzes, under normoxic conditions, the post-translational formation of 4-hydroxyproline in hypoxia-inducible factor (HIF) alpha proteins. Hydroxylates a specific proline found in each of the oxygen-dependent degradation (ODD) domains (N-terminal, NODD, and C-terminal, CODD) of HIF1A. Also hydroxylates HIF2A. Has a preference for the CODD site for both HIF1…	sp|Q9GZT9|EGLN1_HUMAN	sp|Q9GZT9|EGLN1_HUMAN Egl nine homolog 1 OS=Homo sapiens OX=9606 GN=EGLN1 PE=1 SV=1	1	5	5	5	17.1	46.02	574380	129590	4.43229
Q15057	Arf-GAP with coiled-coil, ANK repeat and PH domain-containing protein 2	ACAP2	FUNCTION: GTPase-activating protein (GAP) for ADP ribosylation factor 6 (ARF6). {ECO:0000269|PubMed:11062263}.	sp|Q15057|ACAP2_HUMAN	sp|Q15057|ACAP2_HUMAN Arf-GAP with coiled-coil, ANK repeat and PH domain-containing protein 2 OS=Homo sapiens OX=9606 GN=ACAP2 PE=1 SV=3	1	6	6	6	12.6	88.028	375420	84792	4.42754
P40855	Peroxisomal biogenesis factor 19	PEX19	FUNCTION: Necessary for early peroxisomal biogenesis. Acts both as a cytosolic chaperone and as an import receptor for peroxisomal membrane proteins (PMPs). Binds and stabilizes newly synthesized PMPs in the cytoplasm by interacting with their hydrophobic membrane-spanning domains, and targets them to the peroxisome membrane by binding to the integral membrane protein PEX3. Excludes CDKN2A from t…	sp|P40855|PEX19_HUMAN	sp|P40855|PEX19_HUMAN Peroxisomal biogenesis factor 19 OS=Homo sapiens OX=9606 GN=PEX19 PE=1 SV=1	1	6	6	6	27.4	32.806	1481400	334830	4.42433
Q15042	Rab3 GTPase-activating protein catalytic subunit	RAB3GAP1	FUNCTION: Probable catalytic subunit of a GTPase activating protein that has specificity for Rab3 subfamily (RAB3A, RAB3B, RAB3C and RAB3D). Rab3 proteins are involved in regulated exocytosis of neurotransmitters and hormones. Specifically converts active Rab3-GTP to the inactive form Rab3-GDP. Required for normal eye and brain development. May participate in neurodevelopmental processes such as …	sp|Q15042|RB3GP_HUMAN	sp|Q15042|RB3GP_HUMAN Rab3 GTPase-activating protein catalytic subunit OS=Homo sapiens OX=9606 GN=RAB3GAP1 PE=1 SV=3	1	13	13	13	17.5	110.52	1685500	381140	4.42226
P43307	Translocon-associated protein subunit alpha	SSR1	FUNCTION: TRAP proteins are part of a complex whose function is to bind calcium to the ER membrane and thereby regulate the retention of ER resident proteins. May be involved in the recycling of the translocation apparatus after completion of the translocation process or may function as a membrane-bound chaperone facilitating folding of translocated proteins.	sp|P43307|SSRA_HUMAN	sp|P43307|SSRA_HUMAN Translocon-associated protein subunit alpha OS=Homo sapiens OX=9606 GN=SSR1 PE=1 SV=3	1	3	3	3	15.7	32.235	1647400	375090	4.39201
Q9Y3D3	28S ribosomal protein S16, mitochondrial	MRPS16		sp|Q9Y3D3|RT16_HUMAN	sp|Q9Y3D3|RT16_HUMAN 28S ribosomal protein S16, mitochondrial OS=Homo sapiens OX=9606 GN=MRPS16 PE=1 SV=1	1	3	3	3	27.7	15.345	1612800	371010	4.34705
P50151	Guanine nucleotide-binding protein G(I)/G(S)/G(O) subunit gamma-10	GNG10	FUNCTION: Guanine nucleotide-binding proteins (G proteins) are involved as a modulator or transducer in various transmembrane signaling systems. The beta and gamma chains are required for the GTPase activity, for replacement of GDP by GTP, and for G protein-effector interaction. Interacts with beta-1 and beta-2, but not with beta-3.	sp|P50151|GBG10_HUMAN	sp|P50151|GBG10_HUMAN Guanine nucleotide-binding protein G(I)/G(S)/G(O) subunit gamma-10 OS=Homo sapiens OX=9606 GN=GNG10 PE=1 SV=1	1	2	2	2	42.6	7.2053	411960	94878	4.342
P55036	26S proteasome non-ATPase regulatory subunit 4	PSMD4	FUNCTION: Component of the 26S proteasome, a multiprotein complex involved in the ATP-dependent degradation of ubiquitinated proteins. This complex plays a key role in the maintenance of protein homeostasis by removing misfolded or damaged proteins, which could impair cellular functions, and by removing proteins whose functions are no longer required. Therefore, the proteasome participates in num…	sp|P55036|PSMD4_HUMAN	sp|P55036|PSMD4_HUMAN 26S proteasome non-ATPase regulatory subunit 4 OS=Homo sapiens OX=9606 GN=PSMD4 PE=1 SV=1	1	8	8	6	31.3	40.736	6334200	1461300	4.33463
Q567U6	Coiled-coil domain-containing protein 93	CCDC93	FUNCTION: Component of the CCC complex, which is involved in the regulation of endosomal recycling of surface proteins, including integrins, signaling receptor and channels. The CCC complex associates with SNX17, retriever and WASH complexes to prevent lysosomal degradation and promote cell surface recycling of numerous cargos such as integrins ITGA5:ITGB1 (PubMed:28892079, PubMed:25355947). Invo…	sp|Q567U6|CCD93_HUMAN	sp|Q567U6|CCD93_HUMAN Coiled-coil domain-containing protein 93 OS=Homo sapiens OX=9606 GN=CCDC93 PE=1 SV=2	1	6	6	6	12.7	73.197	374680	86540	4.32956
Q9UKL0	REST corepressor 1	RCOR1	FUNCTION: Essential component of the BHC complex, a corepressor complex that represses transcription of neuron-specific genes in non-neuronal cells. The BHC complex is recruited at RE1/NRSE sites by REST and acts by deacetylating and demethylating specific sites on histones, thereby acting as a chromatin modifier. In the BHC complex, it serves as a molecular beacon for the recruitment of molecula…	sp|Q9UKL0|RCOR1_HUMAN	sp|Q9UKL0|RCOR1_HUMAN REST corepressor 1 OS=Homo sapiens OX=9606 GN=RCOR1 PE=1 SV=2	1	5	5	4	14	53.327	632040	146420	4.31662
Q5VYV7	Protein SLX4IP	SLX4IP		sp|Q5VYV7|SLX4I_HUMAN	sp|Q5VYV7|SLX4I_HUMAN Protein SLX4IP OS=Homo sapiens OX=9606 GN=SLX4IP PE=1 SV=1	1	1	1	1	4.2	45.551	82766	19193	4.3123
Q9Y248	DNA replication complex GINS protein PSF2	GINS2	FUNCTION: The GINS complex plays an essential role in the initiation of DNA replication, and progression of DNA replication forks. GINS complex seems to bind preferentially to single-stranded DNA. {ECO:0000269|PubMed:17417653}.	sp|Q9Y248|PSF2_HUMAN	sp|Q9Y248|PSF2_HUMAN DNA replication complex GINS protein PSF2 OS=Homo sapiens OX=9606 GN=GINS2 PE=1 SV=1	1	1	1	1	6.5	21.427	79862	18568	4.30106
P51617	Interleukin-1 receptor-associated kinase 1	IRAK1	FUNCTION: Serine/threonine-protein kinase that plays a critical role in initiating innate immune response against foreign pathogens. Involved in Toll-like receptor (TLR) and IL-1R signaling pathways. Is rapidly recruited by MYD88 to the receptor-signaling complex upon TLR activation. Association with MYD88 leads to IRAK1 phosphorylation by IRAK4 and subsequent autophosphorylation and kinase activ…	sp|P51617|IRAK1_HUMAN	sp|P51617|IRAK1_HUMAN Interleukin-1 receptor-associated kinase 1 OS=Homo sapiens OX=9606 GN=IRAK1 PE=1 SV=2	1	6	6	6	12.9	76.536	509860	119270	4.27484
Q15334	Lethal(2) giant larvae protein homolog 1	LLGL1	FUNCTION: Cortical cytoskeleton protein found in a complex involved in maintaining cell polarity and epithelial integrity. Involved in the regulation of mitotic spindle orientation, proliferation, differentiation and tissue organization of neuroepithelial cells. Involved in axonogenesis through RAB10 activation thereby regulating vesicular membrane trafficking toward the axonal plasma membrane. {…	sp|Q15334|L2GL1_HUMAN	sp|Q15334|L2GL1_HUMAN Lethal(2) giant larvae protein homolog 1 OS=Homo sapiens OX=9606 GN=LLGL1 PE=1 SV=3	1	21	21	21	28.9	115.42	6773100	1585100	4.27298
Q92696	Geranylgeranyl transferase type-2 subunit alpha	RABGGTA	FUNCTION: Catalyzes the transfer of a geranylgeranyl moiety from geranylgeranyl diphosphate to both cysteines of Rab proteins with the C-terminal sequence -XXCC, -XCXC and -CCXX, such as RAB1A, RAB3A, RAB5A and RAB7A. {ECO:0000269|PubMed:7991565}.	sp|Q92696|PGTA_HUMAN	sp|Q92696|PGTA_HUMAN Geranylgeranyl transferase type-2 subunit alpha OS=Homo sapiens OX=9606 GN=RABGGTA PE=1 SV=2	1	4	4	4	6.3	65.071	439480	102860	4.2726
Q06323	Proteasome activator complex subunit 1	PSME1	FUNCTION: Implicated in immunoproteasome assembly and required for efficient antigen processing. The PA28 activator complex enhances the generation of class I binding peptides by altering the cleavage pattern of the proteasome.	sp|Q06323|PSME1_HUMAN	sp|Q06323|PSME1_HUMAN Proteasome activator complex subunit 1 OS=Homo sapiens OX=9606 GN=PSME1 PE=1 SV=1	1	12	12	12	43.4	28.723	3410000	800820	4.25814
Q9H1I8	Activating signal cointegrator 1 complex subunit 2	ASCC2	FUNCTION: Plays a role in DNA damage repair as component of the ASCC complex. Recruits ASCC3 and ALKBH3 to sites of DNA damage by binding to polyubiquitinated proteins that have 'Lys-63'-linked polyubiquitin chains (PubMed:29144457). Part of the ASC-1 complex that enhances NF-kappa-B, SRF and AP1 transactivation (PubMed:12077347). {ECO:0000269|PubMed:12077347, ECO:0000269|PubMed:29144457}.	sp|Q9H1I8|ASCC2_HUMAN	sp|Q9H1I8|ASCC2_HUMAN Activating signal cointegrator 1 complex subunit 2 OS=Homo sapiens OX=9606 GN=ASCC2 PE=1 SV=3	1	5	5	5	7	86.359	657940	154980	4.24532
O14786	Neuropilin-1	NRP1	FUNCTION: Receptor involved in the development of the cardiovascular system, in angiogenesis, in the formation of certain neuronal circuits and in organogenesis outside the nervous system. It mediates the chemorepulsant activity of semaphorins (PubMed:9288753, PubMed:9529250, PubMed:10688880). It binds to semaphorin 3A, The PLGF-2 isoform of PGF, The VEGF165 isoform of VEGFA and VEGFB (PubMed:928…	sp|O14786|NRP1_HUMAN	sp|O14786|NRP1_HUMAN Neuropilin-1 OS=Homo sapiens OX=9606 GN=NRP1 PE=1 SV=3	1	14	14	14	24.9	103.13	2428300	575030	4.22291
Q15003	Condensin complex subunit 2	NCAPH	FUNCTION: Regulatory subunit of the condensin complex, a complex required for conversion of interphase chromatin into mitotic-like condense chromosomes. The condensin complex probably introduces positive supercoils into relaxed DNA in the presence of type I topoisomerases and converts nicked DNA into positive knotted forms in the presence of type II topoisomerases (PubMed:11136719). Early in neur…	sp|Q15003|CND2_HUMAN	sp|Q15003|CND2_HUMAN Condensin complex subunit 2 OS=Homo sapiens OX=9606 GN=NCAPH PE=1 SV=3	1	13	13	13	26.3	82.562	3319600	789030	4.20719
P01137	Transforming growth factor beta-1 proprotein	TGFB1	FUNCTION: Transforming growth factor beta-1 proprotein: Precursor of the Latency-associated peptide (LAP) and Transforming growth factor beta-1 (TGF-beta-1) chains, which constitute the regulatory and active subunit of TGF-beta-1, respectively. {ECO:0000269|PubMed:29109152, ECO:0000303|PubMed:27252363}.; FUNCTION: [Latency-associated peptide]: Required to maintain the Transforming growth factor b…	sp|P01137|TGFB1_HUMAN	sp|P01137|TGFB1_HUMAN Transforming growth factor beta-1 proprotein OS=Homo sapiens OX=9606 GN=TGFB1 PE=1 SV=2	1	4	4	4	15.1	44.341	291560	69353	4.204
Q9NYB0	Telomeric repeat-binding factor 2-interacting protein 1	TERF2IP	FUNCTION: Acts both as a regulator of telomere function and as a transcription regulator. Involved in the regulation of telomere length and protection as a component of the shelterin complex (telosome). In contrast to other components of the shelterin complex, it is dispensible for telomere capping and does not participate in the protection of telomeres against non-homologous end-joining (NHEJ)-m…	sp|Q9NYB0|TE2IP_HUMAN	sp|Q9NYB0|TE2IP_HUMAN Telomeric repeat-binding factor 2-interacting protein 1 OS=Homo sapiens OX=9606 GN=TERF2IP PE=1 SV=1	1	7	7	7	29.8	44.259	978570	234110	4.17996
Q9P016	Thymocyte nuclear protein 1	THYN1	FUNCTION: Specifically binds 5-hydroxymethylcytosine (5hmC), suggesting that it acts as a specific reader of 5hmC. {ECO:0000250}.	sp|Q9P016|THYN1_HUMAN	sp|Q9P016|THYN1_HUMAN Thymocyte nuclear protein 1 OS=Homo sapiens OX=9606 GN=THYN1 PE=1 SV=1	1	8	8	8	37.8	25.697	1657000	398290	4.16029
O75608	Acyl-protein thioesterase 1	LYPLA1	FUNCTION: Acts as a acyl-protein thioesterase (PubMed:19439193, PubMed:20418879). Hydrolyzes fatty acids from S-acylated cysteine residues in proteins such as trimeric G alpha proteins or HRAS (PubMed:20418879). Has depalmitoylating activity toward KCNMA1 (PubMed:22399288). Acts as a lysophospholipase and hydrolyzes lysophosphatidylcholine (lyso-PC) (PubMed:19439193). Also hydrolyzes lysophosphat…	sp|O75608|LYPA1_HUMAN	sp|O75608|LYPA1_HUMAN Acyl-protein thioesterase 1 OS=Homo sapiens OX=9606 GN=LYPLA1 PE=1 SV=1	1	2	2	2	13.5	24.669	708250	170320	4.15835
P10589	COUP transcription factor 1	NR2F1	FUNCTION: Coup (chicken ovalbumin upstream promoter) transcription factor binds to the ovalbumin promoter and, in conjunction with another protein (S300-II) stimulates initiation of transcription. Binds to both direct repeats and palindromes of the 5'-AGGTCA-3' motif. Represses transcriptional activity of LHCG. {ECO:0000269|PubMed:10644740, ECO:0000269|PubMed:11682620}.	sp|P10589|COT1_HUMAN	sp|P10589|COT1_HUMAN COUP transcription factor 1 OS=Homo sapiens OX=9606 GN=NR2F1 PE=1 SV=1	1	5	1	1	14.7	46.155	133924	32220	4.15655
Q9Y2T2	AP-3 complex subunit mu-1	AP3M1	FUNCTION: Part of the AP-3 complex, an adaptor-related complex which is not clathrin-associated. The complex is associated with the Golgi region as well as more peripheral structures. It facilitates the budding of vesicles from the Golgi membrane and may be directly involved in trafficking to lysosomes. In concert with the BLOC-1 complex, AP-3 is required to target cargos into vesicles assembled …	sp|Q9Y2T2|AP3M1_HUMAN	sp|Q9Y2T2|AP3M1_HUMAN AP-3 complex subunit mu-1 OS=Homo sapiens OX=9606 GN=AP3M1 PE=1 SV=1	1	9	9	9	40.2	46.939	3456200	831760	4.15529
Q9UJX5	Anaphase-promoting complex subunit 4	ANAPC4	FUNCTION: Component of the anaphase promoting complex/cyclosome (APC/C), a cell cycle-regulated E3 ubiquitin ligase that controls progression through mitosis and the G1 phase of the cell cycle. The APC/C complex acts by mediating ubiquitination and subsequent degradation of target proteins: it mainly mediates the formation of 'Lys-11'-linked polyubiquitin chains and, to a lower extent, the format…	sp|Q9UJX5|APC4_HUMAN	sp|Q9UJX5|APC4_HUMAN Anaphase-promoting complex subunit 4 OS=Homo sapiens OX=9606 GN=ANAPC4 PE=1 SV=2	1	5	5	5	6.7	92.115	504520	121900	4.1388
Q9H1K1	Iron-sulfur cluster assembly enzyme ISCU	ISCU	FUNCTION: Scaffold protein for the de novo synthesis of iron-sulfur (Fe-S) clusters within mitochondria, which is required for maturation of both mitochondrial and cytoplasmic [2Fe-2S] and [4Fe-4S] proteins (PubMed:11060020). First, a [2Fe-2S] cluster is transiently assembled on the scaffold protein ISCU. In a second step, the cluster is released from ISCU, transferred to a glutaredoxin GLRX5, fo…	sp|Q9H1K1|ISCU_HUMAN	sp|Q9H1K1|ISCU_HUMAN Iron-sulfur cluster assembly enzyme ISCU OS=Homo sapiens OX=9606 GN=ISCU PE=1 SV=2	1	4	4	4	24.6	17.999	1143500	277820	4.11597
Q8N118	Cytochrome P450 4X1	CYP4X1	FUNCTION: A cytochrome P450 monooxygenase that selectively catalyzes the epoxidation of the last double bond of the arachidonoyl moiety of anandamide, potentially modulating endocannabinoid signaling. Has no hydroxylase activity toward various fatty acids, steroids and prostaglandins. Mechanistically, uses molecular oxygen inserting one oxygen atom into a substrate, and reducing the second into a…	sp|Q8N118|CP4X1_HUMAN	sp|Q8N118|CP4X1_HUMAN Cytochrome P450 4X1 OS=Homo sapiens OX=9606 GN=CYP4X1 PE=1 SV=1	1	6	6	6	15.7	58.875	981020	239880	4.08963
Q93034	Cullin-5	CUL5	FUNCTION: Core component of multiple SCF-like ECS (Elongin-Cullin 2/5-SOCS-box protein) E3 ubiquitin-protein ligase complexes, which mediate the ubiquitination and subsequent proteasomal degradation of target proteins. As a scaffold protein may contribute to catalysis through positioning of the substrate and the ubiquitin-conjugating enzyme. The functional specificity of the E3 ubiquitin-protein …	sp|Q93034|CUL5_HUMAN	sp|Q93034|CUL5_HUMAN Cullin-5 OS=Homo sapiens OX=9606 GN=CUL5 PE=1 SV=4	1	8	8	8	12.4	90.954	1029900	252580	4.07752
Q14137	Ribosome biogenesis protein BOP1	BOP1	FUNCTION: Component of the PeBoW complex, which is required for maturation of 28S and 5.8S ribosomal RNAs and formation of the 60S ribosome. {ECO:0000255|HAMAP-Rule:MF_03027, ECO:0000269|PubMed:17353269, ECO:0000269|PubMed:24120868}.	sp|Q14137|BOP1_HUMAN	sp|Q14137|BOP1_HUMAN Ribosome biogenesis protein BOP1 OS=Homo sapiens OX=9606 GN=BOP1 PE=1 SV=2	1	3	3	3	6.3	83.629	163870	40198	4.07657
Q14151	Scaffold attachment factor B2	SAFB2	FUNCTION: Binds to scaffold/matrix attachment region (S/MAR) DNA. Can function as an estrogen receptor corepressor and can also inhibit cell proliferation.	sp|Q14151|SAFB2_HUMAN	sp|Q14151|SAFB2_HUMAN Scaffold attachment factor B2 OS=Homo sapiens OX=9606 GN=SAFB2 PE=1 SV=1	1	7	3	3	11.1	107.47	185570	45526	4.07613
Q9UKY1	Zinc fingers and homeoboxes protein 1	ZHX1	FUNCTION: Acts as a transcriptional repressor. Increases DNMT3B-mediated repressive transcriptional activity when DNMT3B is tethered to DNA. May link molecule between DNMT3B and other co-repressor proteins. {ECO:0000269|PubMed:12237128}.	sp|Q9UKY1|ZHX1_HUMAN	sp|Q9UKY1|ZHX1_HUMAN Zinc fingers and homeoboxes protein 1 OS=Homo sapiens OX=9606 GN=ZHX1 PE=1 SV=1	1	2	2	2	4.6	98.096	89880	22109	4.06531
Q7Z4H7	HAUS augmin-like complex subunit 6	HAUS6	FUNCTION: Contributes to mitotic spindle assembly, maintenance of centrosome integrity and completion of cytokinesis as part of the HAUS augmin-like complex. Promotes the nucleation of microtubules from the spindle through recruitment of NEDD1 and gamma-tubulin. {ECO:0000269|PubMed:19029337, ECO:0000269|PubMed:19369198, ECO:0000269|PubMed:19427217}.	sp|Q7Z4H7|HAUS6_HUMAN	sp|Q7Z4H7|HAUS6_HUMAN HAUS augmin-like complex subunit 6 OS=Homo sapiens OX=9606 GN=HAUS6 PE=1 SV=2	1	14	14	14	21.2	108.62	1209600	297670	4.06356
O43314	Inositol hexakisphosphate and diphosphoinositol-pentakisphosphate kinase 2	PPIP5K2	FUNCTION: Bifunctional inositol kinase that acts in concert with the IP6K kinases IP6K1, IP6K2 and IP6K3 to synthesize the diphosphate group-containing inositol pyrophosphates diphosphoinositol pentakisphosphate, PP-InsP5, and bis-diphosphoinositol tetrakisphosphate, (PP)2-InsP4 (PubMed:17690096, PubMed:17702752, PubMed:21222653, PubMed:29590114). PP-InsP5 and (PP)2-InsP4, also respectively calle…	sp|O43314|VIP2_HUMAN;sp|Q6PFW1|VIP1_HUMAN	sp|O43314|VIP2_HUMAN Inositol hexakisphosphate and diphosphoinositol-pentakisphosphate kinase 2 OS=Homo sapiens OX=9606 GN=PPIP5K2 PE=1 SV=3;sp|Q6PFW1|VIP1_HUMAN Inositol hexakisphosphate and diphosphoinositol-pentakisphosphate kinase 1 OS=Homo sapiens OX=	2	1	1	1	1.1	140.41	50611	12469	4.05895
Q6UXH1	Protein disulfide isomerase CRELD2	CRELD2	FUNCTION: Protein disulfide isomerase (By similarity). Might play a role in the unfolded protein response (By similarity). May regulate transport of alpha4-beta2 neuronal acetylcholine receptor (PubMed:16238698). {ECO:0000250|UniProtKB:Q9CYA0, ECO:0000269|PubMed:16238698}.	sp|Q6UXH1|CREL2_HUMAN	sp|Q6UXH1|CREL2_HUMAN Protein disulfide isomerase CRELD2 OS=Homo sapiens OX=9606 GN=CRELD2 PE=1 SV=1	1	7	7	7	28.6	38.191	1155700	286360	4.03583
P08047	Transcription factor Sp1	SP1	FUNCTION: Transcription factor that can activate or repress transcription in response to physiological and pathological stimuli. Binds with high affinity to GC-rich motifs and regulates the expression of a large number of genes involved in a variety of processes such as cell growth, apoptosis, differentiation and immune responses. Highly regulated by post-translational modifications (phosphorylat…	sp|P08047|SP1_HUMAN	sp|P08047|SP1_HUMAN Transcription factor Sp1 OS=Homo sapiens OX=9606 GN=SP1 PE=1 SV=3	1	5	5	5	10.6	80.692	400650	99381	4.03145
Q9Y5R8	Trafficking protein particle complex subunit 1	TRAPPC1	FUNCTION: May play a role in vesicular transport from endoplasmic reticulum to Golgi.	sp|Q9Y5R8|TPPC1_HUMAN	sp|Q9Y5R8|TPPC1_HUMAN Trafficking protein particle complex subunit 1 OS=Homo sapiens OX=9606 GN=TRAPPC1 PE=1 SV=1	1	4	4	4	33.8	16.831	1196100	297410	4.02172
Q05086	Ubiquitin-protein ligase E3A	UBE3A	FUNCTION: E3 ubiquitin-protein ligase which accepts ubiquitin from an E2 ubiquitin-conjugating enzyme in the form of a thioester and transfers it to its substrates (PubMed:10373495, PubMed:16772533, PubMed:19204938, PubMed:19233847, PubMed:19325566, PubMed:19591933, PubMed:22645313, PubMed:24273172, PubMed:24728990). Several substrates have been identified including the ARNTL/BMAL1, ARC, RAD23A a…	sp|Q05086|UBE3A_HUMAN	sp|Q05086|UBE3A_HUMAN Ubiquitin-protein ligase E3A OS=Homo sapiens OX=9606 GN=UBE3A PE=1 SV=4	1	8	8	8	15.9	100.69	1258100	312910	4.02064
Q6ZT62	Bargin	BARGIN	FUNCTION: GTPase activating protein (GAP) which specifically converts GTP-bound RAC1 and CDC42 in their inactive GDP-bound form. The GAP activity is enhanced by the non-covalent binding of K-29 and K-48 polyubiquitin chains. {ECO:0000269|PubMed:23223568}.	sp|Q6ZT62|BGIN_HUMAN;sp|Q9Y3L3|3BP1_HUMAN	sp|Q6ZT62|BGIN_HUMAN Bargin OS=Homo sapiens OX=9606 GN=BARGIN PE=1 SV=2;sp|Q9Y3L3|3BP1_HUMAN SH3 domain-binding protein 1 OS=Homo sapiens OX=9606 GN=SH3BP1 PE=1 SV=3	2	10	10	8	23.3	73.599	671590	167080	4.01957
P27448	MAP/microtubule affinity-regulating kinase 3	MARK3	FUNCTION: Serine/threonine-protein kinase (PubMed:23666762). Involved in the specific phosphorylation of microtubule-associated proteins for MAP2 and MAP4. Phosphorylates the microtubule-associated protein MAPT/TAU (PubMed:23666762). Phosphorylates CDC25C on 'Ser-216'. Regulates localization and activity of some histone deacetylases by mediating phosphorylation of HDAC7, promoting subsequent inte…	sp|P27448|MARK3_HUMAN	sp|P27448|MARK3_HUMAN MAP/microtubule affinity-regulating kinase 3 OS=Homo sapiens OX=9606 GN=MARK3 PE=1 SV=5	1	11	7	6	21	84.428	225900	56344	4.0093
Q53EZ4	Centrosomal protein of 55 kDa	CEP55	FUNCTION: Plays a role in mitotic exit and cytokinesis (PubMed:16198290, PubMed:17853893). Recruits PDCD6IP and TSG101 to midbody during cytokinesis. Required for successful completion of cytokinesis (PubMed:17853893). Not required for microtubule nucleation (PubMed:16198290). Plays a role in the development of the brain and kidney (PubMed:28264986). {ECO:0000269|PubMed:16198290, ECO:0000269|PubM…	sp|Q53EZ4|CEP55_HUMAN	sp|Q53EZ4|CEP55_HUMAN Centrosomal protein of 55 kDa OS=Homo sapiens OX=9606 GN=CEP55 PE=1 SV=3	1	9	9	9	23.5	54.178	1058300	267460	3.95685
P84101	Small EDRK-rich factor 2	SERF2	FUNCTION: Positive regulator of amyloid protein aggregation and proteotoxicity (PubMed:20723760). Induces conformational changes in amyloid proteins, such as HTT, driving them into compact formations preceding the formation of aggregates (PubMed:20723760). {ECO:0000269|PubMed:20723760}.	sp|P84101|SERF2_HUMAN	sp|P84101|SERF2_HUMAN Small EDRK-rich factor 2 OS=Homo sapiens OX=9606 GN=SERF2 PE=1 SV=1	1	2	2	2	30.5	6.8998	124380	31699	3.92378
P42694	Probable helicase with zinc finger domain	HELZ	FUNCTION: May act as a helicase that plays a role in RNA metabolism in multiple tissues and organs within the developing embryo.	sp|P42694|HELZ_HUMAN	sp|P42694|HELZ_HUMAN Probable helicase with zinc finger domain OS=Homo sapiens OX=9606 GN=HELZ PE=1 SV=2	1	12	12	12	8.9	218.97	597440	152290	3.92304
Q86TG7	Retrotransposon-derived protein PEG10	PEG10	FUNCTION: Prevents apoptosis in hepatocellular carcinoma (HCC) cells through interaction with SIAH1, a mediator of apoptosis. May also have a role in cell growth promotion and hepatoma formation. Inhibits the TGF-beta signaling by interacting with the TGF-beta receptor ALK1. When overexpressed, induces the formation of cellular extension, such as filipodia in association with ALK1. Involved at th…	sp|Q86TG7|PEG10_HUMAN	sp|Q86TG7|PEG10_HUMAN Retrotransposon-derived protein PEG10 OS=Homo sapiens OX=9606 GN=PEG10 PE=1 SV=2	1	10	10	10	20.9	80.172	1557500	397050	3.92268
Q16762	Thiosulfate sulfurtransferase	TST	FUNCTION: Formation of iron-sulfur complexes, cyanide detoxification or modification of sulfur-containing enzymes. Other thiol compounds, besides cyanide, can act as sulfur ion acceptors. Also has weak mercaptopyruvate sulfurtransferase (MST) activity (By similarity). Together with MRPL18, acts as a mitochondrial import factor for the cytosolic 5S rRNA. Only the nascent unfolded cytoplasmic form …	sp|Q16762|THTR_HUMAN	sp|Q16762|THTR_HUMAN Thiosulfate sulfurtransferase OS=Homo sapiens OX=9606 GN=TST PE=1 SV=4	1	9	9	9	40.4	33.429	3133500	801990	3.90716
Q9UBF8	Phosphatidylinositol 4-kinase beta	PI4KB	FUNCTION: Phosphorylates phosphatidylinositol (PI) in the first committed step in the production of the second messenger inositol-1,4,5,-trisphosphate (PIP). May regulate Golgi disintegration/reorganization during mitosis, possibly via its phosphorylation. Involved in Golgi-to-plasma membrane trafficking (By similarity). {ECO:0000250, ECO:0000269|PubMed:10559940, ECO:0000269|PubMed:12749687, ECO:…	sp|Q9UBF8|PI4KB_HUMAN	sp|Q9UBF8|PI4KB_HUMAN Phosphatidylinositol 4-kinase beta OS=Homo sapiens OX=9606 GN=PI4KB PE=1 SV=1	1	5	5	5	9.4	91.378	157220	40464	3.88543
Q8WUQ7	Splicing factor Cactin	CACTIN	FUNCTION: Involved in the regulation of innate immune response (PubMed:20829348). Acts as negative regulator of Toll-like receptor, interferon-regulatory factor (IRF) and canonical NF-kappa-B signaling pathways (PubMed:20829348, PubMed:26363554). Contributes to the regulation of transcriptional activation of NF-kappa-B target genes in response to endogenous proinflammatory stimuli (PubMed:2082934…	sp|Q8WUQ7|CATIN_HUMAN	sp|Q8WUQ7|CATIN_HUMAN Splicing factor Cactin OS=Homo sapiens OX=9606 GN=CACTIN PE=1 SV=3	1	2	2	2	4	88.701	464400	120000	3.87
Q9Y3D2	Methionine-R-sulfoxide reductase B2, mitochondrial	MSRB2	FUNCTION: Methionine-sulfoxide reductase that specifically reduces methionine (R)-sulfoxide back to methionine. While in many cases, methionine oxidation is the result of random oxidation following oxidative stress, methionine oxidation is also a post-translational modification that takes place on specific residue. Upon oxidative stress, may play a role in the preservation of mitochondrial integr…	sp|Q9Y3D2|MSRB2_HUMAN	sp|Q9Y3D2|MSRB2_HUMAN Methionine-R-sulfoxide reductase B2, mitochondrial OS=Homo sapiens OX=9606 GN=MSRB2 PE=1 SV=2	1	6	6	6	40.7	19.536	727380	188210	3.86473
Q8WZA0	Protein LZIC	LZIC		sp|Q8WZA0|LZIC_HUMAN	sp|Q8WZA0|LZIC_HUMAN Protein LZIC OS=Homo sapiens OX=9606 GN=LZIC PE=1 SV=1	1	3	3	3	18.9	21.494	502760	130110	3.86411
Q96I51	RCC1-like G exchanging factor-like protein	RCC1L	FUNCTION: Guanine nucleotide exchange factor (GEF) for mitochondrial dynamin-related GTPase OPA1. Activates OPA1, by exchanging bound GDP for free GTP, and drives OPA1 and MFN1-dependent mitochondrial fusion (PubMed:28746876). Plays an essential role in mitochondrial ribosome biogenesis. As a component of a functional protein-RNA module, consisting of RCC1L, NGRN, RPUSD3, RPUSD4, TRUB2, FASTKD2 a…	sp|Q96I51|RCC1L_HUMAN	sp|Q96I51|RCC1L_HUMAN RCC1-like G exchanging factor-like protein OS=Homo sapiens OX=9606 GN=RCC1L PE=1 SV=3	1	7	7	7	22.2	49.897	1308900	339040	3.86061
Q9NZJ9	Diphosphoinositol polyphosphate phosphohydrolase 2	NUDT4	FUNCTION: Cleaves a beta-phosphate from the diphosphate groups in PP-InsP5 (diphosphoinositol pentakisphosphate), PP-InsP4 and [PP]2-InsP4 (bisdiphosphoinositol tetrakisphosphate), suggesting that it may play a role in signal transduction. Also able to catalyze the hydrolysis of dinucleoside oligophosphate Ap6A, but not Ap5A. The major reaction products are ADP and p4a from Ap6A. Also able to hyd…	sp|Q9NZJ9|NUDT4_HUMAN;sp|Q96G61|NUD11_HUMAN;sp|Q8NFP7|NUD10_HUMAN;sp|A0A024RBG1|NUD4B_HUMAN	sp|Q9NZJ9|NUDT4_HUMAN Diphosphoinositol polyphosphate phosphohydrolase 2 OS=Homo sapiens OX=9606 GN=NUDT4 PE=1 SV=2;sp|Q96G61|NUD11_HUMAN Diphosphoinositol polyphosphate phosphohydrolase 3-beta OS=Homo sapiens OX=9606 GN=NUDT11 PE=1 SV=1;sp|Q8NFP7|NUD10_HU	4	2	2	2	13.9	20.306	345990	89751	3.855
Q7L2J0	7SK snRNA methylphosphate capping enzyme	MEPCE	FUNCTION: S-adenosyl-L-methionine-dependent methyltransferase that adds a methylphosphate cap at the 5'-end of 7SK snRNA (7SK RNA), leading to stabilize it (PubMed:17643375, PubMed:19906723, PubMed:30559425). Also has a non-enzymatic function as part of the 7SK RNP complex: the 7SK RNP complex sequesters the positive transcription elongation factor b (P-TEFb) in a large inactive 7SK RNP complex p…	sp|Q7L2J0|MEPCE_HUMAN	sp|Q7L2J0|MEPCE_HUMAN 7SK snRNA methylphosphate capping enzyme OS=Homo sapiens OX=9606 GN=MEPCE PE=1 SV=1	1	11	11	11	28.7	74.354	1247100	323710	3.85252
Q96GG9	DCN1-like protein 1	DCUN1D1	FUNCTION: Part of an E3 ubiquitin ligase complex for neddylation. Promotes neddylation of cullin components of E3 cullin-RING ubiquitin ligase complexes. Acts by binding to cullin-RBX1 complexes in the cytoplasm and promoting their nuclear translocation, enhancing recruitment of E2-NEDD8 (UBE2M-NEDD8) thioester to the complex, and optimizing the orientation of proteins in the complex to allow eff…	sp|Q96GG9|DCNL1_HUMAN	sp|Q96GG9|DCNL1_HUMAN DCN1-like protein 1 OS=Homo sapiens OX=9606 GN=DCUN1D1 PE=1 SV=1	1	2	2	2	11.2	30.124	147810	38484	3.84082
P61020	Ras-related protein Rab-5B	RAB5B	FUNCTION: Protein transport. Probably involved in vesicular traffic (By similarity). {ECO:0000250}.	sp|P61020|RAB5B_HUMAN	sp|P61020|RAB5B_HUMAN Ras-related protein Rab-5B OS=Homo sapiens OX=9606 GN=RAB5B PE=1 SV=1	1	9	6	6	60.9	23.707	2423900	636440	3.80853
O00522	Krev interaction trapped protein 1	KRIT1	FUNCTION: Component of the CCM signaling pathway which is a crucial regulator of heart and vessel formation and integrity (By similarity). Negative regulator of angiogenesis. Inhibits endothelial proliferation, apoptosis, migration, lumen formation and sprouting angiogenesis in primary endothelial cells. Promotes AKT phosphorylation in a NOTCH-dependent and independent manner, and inhibits ERK1/2…	sp|O00522|KRIT1_HUMAN	sp|O00522|KRIT1_HUMAN Krev interaction trapped protein 1 OS=Homo sapiens OX=9606 GN=KRIT1 PE=1 SV=2	1	2	2	2	4.6	84.347	85181	22521	3.78229
Q9NRG1	Phosphoribosyltransferase domain-containing protein 1	PRTFDC1	FUNCTION: Has low, barely detectable phosphoribosyltransferase activity (in vitro). Binds GMP, IMP and alpha-D-5-phosphoribosyl 1-pyrophosphate (PRPP). Is not expected to contribute to purine metabolism or GMP salvage.	sp|Q9NRG1|PRDC1_HUMAN	sp|Q9NRG1|PRDC1_HUMAN Phosphoribosyltransferase domain-containing protein 1 OS=Homo sapiens OX=9606 GN=PRTFDC1 PE=1 SV=1	1	1	1	1	5.8	25.673	58563	15547	3.76684
O15126	Secretory carrier-associated membrane protein 1	SCAMP1	FUNCTION: Functions in post-Golgi recycling pathways. Acts as a recycling carrier to the cell surface.	sp|O15126|SCAM1_HUMAN	sp|O15126|SCAM1_HUMAN Secretory carrier-associated membrane protein 1 OS=Homo sapiens OX=9606 GN=SCAMP1 PE=1 SV=2	1	7	7	7	30.2	37.92	3678000	976580	3.7662
Q13153	Serine/threonine-protein kinase PAK 1	PAK1	FUNCTION: Protein kinase involved in intracellular signaling pathways downstream of integrins and receptor-type kinases that plays an important role in cytoskeleton dynamics, in cell adhesion, migration, proliferation, apoptosis, mitosis, and in vesicle-mediated transport processes (PubMed:30290153). Can directly phosphorylate BAD and protects cells against apoptosis. Activated by interaction wit…	sp|Q13153|PAK1_HUMAN	sp|Q13153|PAK1_HUMAN Serine/threonine-protein kinase PAK 1 OS=Homo sapiens OX=9606 GN=PAK1 PE=1 SV=2	1	10	7	6	29	60.646	2148400	571900	3.7566
Q7Z2K8	G protein-regulated inducer of neurite outgrowth 1	GPRIN1	FUNCTION: May be involved in neurite outgrowth. {ECO:0000250}.	sp|Q7Z2K8|GRIN1_HUMAN	sp|Q7Z2K8|GRIN1_HUMAN G protein-regulated inducer of neurite outgrowth 1 OS=Homo sapiens OX=9606 GN=GPRIN1 PE=1 SV=2	1	2	2	2	3.1	102.4	66523	17763	3.74503
Q9Y232	Chromodomain Y-like protein	CDYL	FUNCTION: [Isoform 2]: Chromatin reader protein that recognizes and binds histone H3 trimethylated at 'Lys-9', dimethylated at 'Lys-27' and trimethylated at 'Lys-27' (H3K9me3, H3K27me2 and H3K27me3, respectively) (PubMed:19808672, PubMed:28402439). Part of multimeric repressive chromatin complexes, where it is required for transmission and restoration of repressive histone marks, thereby preservi…	sp|Q9Y232|CDYL_HUMAN	sp|Q9Y232|CDYL_HUMAN Chromodomain Y-like protein OS=Homo sapiens OX=9606 GN=CDYL PE=1 SV=2	1	2	2	2	4.8	66.481	173640	46599	3.72626
Q7L8L6	FAST kinase domain-containing protein 5, mitochondrial	FASTKD5	FUNCTION: Plays an important role in the processing of non-canonical mitochondrial mRNA precursors (PubMed:25683715). {ECO:0000269|PubMed:25683715}.	sp|Q7L8L6|FAKD5_HUMAN	sp|Q7L8L6|FAKD5_HUMAN FAST kinase domain-containing protein 5, mitochondrial OS=Homo sapiens OX=9606 GN=FASTKD5 PE=1 SV=1	1	15	15	15	27.1	86.573	3236000	880620	3.67468
P30084	Enoyl-CoA hydratase, mitochondrial	ECHS1	FUNCTION: Straight-chain enoyl-CoA thioesters from C4 up to at least C16 are processed, although with decreasing catalytic rate. Has high substrate specificity for crotonyl-CoA and moderate specificity for acryloyl-CoA, 3-methylcrotonyl-CoA and methacrylyl-CoA. It is noteworthy that binds tiglyl-CoA, but hydrates only a small amount of this substrate. {ECO:0000269|PubMed:26251176}.	sp|P30084|ECHM_HUMAN	sp|P30084|ECHM_HUMAN Enoyl-CoA hydratase, mitochondrial OS=Homo sapiens OX=9606 GN=ECHS1 PE=1 SV=4	1	11	11	11	40	31.387	24510000	6675000	3.67191
Q8TEP8	Centrosomal protein of 192 kDa	CEP192	FUNCTION: Required for mitotic centrosome maturation and bipolar spindle assembly (PubMed:25042804, PubMed:17980596, PubMed:18207742). Appears to be a major regulator of pericentriolar material (PCM) recruitment, centrosome maturation, and centriole duplication (PubMed:25042804, PubMed:17980596, PubMed:18207742). Centrosome-specific activating scaffold for AURKA and PLK1 (PubMed:25042804). {ECO:0…	sp|Q8TEP8|CE192_HUMAN	sp|Q8TEP8|CE192_HUMAN Centrosomal protein of 192 kDa OS=Homo sapiens OX=9606 GN=CEP192 PE=1 SV=3	1	2	2	2	1.1	279.11	35968	9808.8	3.66691
Q9BU76	Multiple myeloma tumor-associated protein 2	MMTAG2		sp|Q9BU76|MMTA2_HUMAN	sp|Q9BU76|MMTA2_HUMAN Multiple myeloma tumor-associated protein 2 OS=Homo sapiens OX=9606 GN=MMTAG2 PE=1 SV=1	1	3	3	3	14.1	29.411	276420	75440	3.6641
Q92783	Signal transducing adapter molecule 1	STAM	FUNCTION: Involved in intracellular signal transduction mediated by cytokines and growth factors. Upon IL-2 and GM-CSL stimulation, it plays a role in signaling leading to DNA synthesis and MYC induction. May also play a role in T-cell development. Involved in down-regulation of receptor tyrosine kinase via multivesicular body (MVBs) when complexed with HGS (ESCRT-0 complex). The ESCRT-0 complex …	sp|Q92783|STAM1_HUMAN	sp|Q92783|STAM1_HUMAN Signal transducing adapter molecule 1 OS=Homo sapiens OX=9606 GN=STAM PE=1 SV=3	1	8	8	6	22.8	59.179	1559700	425680	3.66402
Q9H5H4	Zinc finger protein 768	ZNF768	FUNCTION: May be involved in transcriptional regulation.	sp|Q9H5H4|ZN768_HUMAN	sp|Q9H5H4|ZN768_HUMAN Zinc finger protein 768 OS=Homo sapiens OX=9606 GN=ZNF768 PE=1 SV=2	1	4	4	4	7.8	60.228	156280	42782	3.65294
P46776	60S ribosomal protein L27a	RPL27A		sp|P46776|RL27A_HUMAN	sp|P46776|RL27A_HUMAN 60S ribosomal protein L27a OS=Homo sapiens OX=9606 GN=RPL27A PE=1 SV=2	1	5	5	5	31.1	16.561	3214700	881010	3.64888
P27361	Mitogen-activated protein kinase 3	MAPK3	FUNCTION: Serine/threonine kinase which acts as an essential component of the MAP kinase signal transduction pathway. MAPK1/ERK2 and MAPK3/ERK1 are the 2 MAPKs which play an important role in the MAPK/ERK cascade. They participate also in a signaling cascade initiated by activated KIT and KITLG/SCF. Depending on the cellular context, the MAPK/ERK cascade mediates diverse biological functions such…	sp|P27361|MK03_HUMAN	sp|P27361|MK03_HUMAN Mitogen-activated protein kinase 3 OS=Homo sapiens OX=9606 GN=MAPK3 PE=1 SV=4	1	9	5	5	28.8	43.135	672170	184540	3.64241
Q9NYJ1	Cytochrome c oxidase assembly factor 4 homolog, mitochondrial	COA4	FUNCTION: Putative COX assembly factor. {ECO:0000250}.	sp|Q9NYJ1|COA4_HUMAN	sp|Q9NYJ1|COA4_HUMAN Cytochrome c oxidase assembly factor 4 homolog, mitochondrial OS=Homo sapiens OX=9606 GN=COA4 PE=1 SV=2	1	6	6	6	80.5	10.134	2449400	673160	3.63866
Q9H7X7	Intraflagellar transport protein 22 homolog	IFT22	FUNCTION: Small GTPase-like component of the intraflagellar transport (IFT) complex B. {ECO:0000250}.	sp|Q9H7X7|IFT22_HUMAN	sp|Q9H7X7|IFT22_HUMAN Intraflagellar transport protein 22 homolog OS=Homo sapiens OX=9606 GN=IFT22 PE=1 SV=1	1	2	2	2	16.2	20.835	94087	25999	3.61887
O94919	Endonuclease domain-containing 1 protein	ENDOD1	FUNCTION: May act as a DNase and a RNase. {ECO:0000305}.	sp|O94919|ENDD1_HUMAN	sp|O94919|ENDD1_HUMAN Endonuclease domain-containing 1 protein OS=Homo sapiens OX=9606 GN=ENDOD1 PE=1 SV=2	1	6	6	6	17.2	55.016	937200	259000	3.61853
Q9NW81	Distal membrane-arm assembly complex protein 2	DMAC2	FUNCTION: Required for the assembly of the mitochondrial NADH:ubiquinone oxidoreductase complex (complex I). Involved in the assembly of the distal region of complex I. {ECO:0000269|PubMed:27626371}.	sp|Q9NW81|DMAC2_HUMAN	sp|Q9NW81|DMAC2_HUMAN Distal membrane-arm assembly complex protein 2 OS=Homo sapiens OX=9606 GN=DMAC2 PE=1 SV=3	1	2	2	2	10.1	29.267	66810	18514	3.60862
P00568	Adenylate kinase isoenzyme 1	AK1	FUNCTION: Catalyzes the reversible transfer of the terminal phosphate group between ATP and AMP. Also displays broad nucleoside diphosphate kinase activity. Plays an important role in cellular energy homeostasis and in adenine nucleotide metabolism. {ECO:0000255|HAMAP-Rule:MF_03171, ECO:0000269|PubMed:23416111}.	sp|P00568|KAD1_HUMAN;sp|Q9Y6K8|KAD5_HUMAN	sp|P00568|KAD1_HUMAN Adenylate kinase isoenzyme 1 OS=Homo sapiens OX=9606 GN=AK1 PE=1 SV=3	2	6	6	6	43.3	21.635	1802600	501300	3.59585
Q9H299	SH3 domain-binding glutamic acid-rich-like protein 3	SH3BGRL3	FUNCTION: Could act as a modulator of glutaredoxin biological activity.	sp|Q9H299|SH3L3_HUMAN	sp|Q9H299|SH3L3_HUMAN SH3 domain-binding glutamic acid-rich-like protein 3 OS=Homo sapiens OX=9606 GN=SH3BGRL3 PE=1 SV=1	1	2	2	2	31.2	10.438	178110	49571	3.59303
O76071	Probable cytosolic iron-sulfur protein assembly protein CIAO1	CIAO1	FUNCTION: Key component of the cytosolic iron-sulfur protein assembly (CIA) complex, a multiprotein complex that mediates the incorporation of iron-sulfur cluster into extramitochondrial Fe/S proteins (PubMed:17937914, PubMed:23891004). As a CIA complex component, interacts specifically with CIAO2A or CIAO2B and MMS19 to assist different branches of iron-sulfur protein assembly, depending of its …	sp|O76071|CIAO1_HUMAN	sp|O76071|CIAO1_HUMAN Probable cytosolic iron-sulfur protein assembly protein CIAO1 OS=Homo sapiens OX=9606 GN=CIAO1 PE=1 SV=1	1	8	8	8	33.9	37.84	1671300	466250	3.58456
O94966	Ubiquitin carboxyl-terminal hydrolase 19	USP19	FUNCTION: Deubiquitinating enzyme that regulates the degradation of various proteins. Deubiquitinates and prevents proteasomal degradation of RNF123 which in turn stimulates CDKN1B ubiquitin-dependent degradation thereby playing a role in cell proliferation. Involved in decreased protein synthesis in atrophying skeletal muscle. Modulates transcription of major myofibrillar proteins. Also involved…	sp|O94966|UBP19_HUMAN	sp|O94966|UBP19_HUMAN Ubiquitin carboxyl-terminal hydrolase 19 OS=Homo sapiens OX=9606 GN=USP19 PE=1 SV=2	1	8	8	8	13.2	145.65	530010	147860	3.58454
Q9ULJ8	Neurabin-1	PPP1R9A	FUNCTION: Binds to actin filaments (F-actin) and shows cross-linking activity. Binds along the sides of the F-actin. May be involved in neurite formation. Inhibits protein phosphatase 1-alpha activity (By similarity). {ECO:0000250}.	sp|Q9ULJ8|NEB1_HUMAN	sp|Q9ULJ8|NEB1_HUMAN Neurabin-1 OS=Homo sapiens OX=9606 GN=PPP1R9A PE=1 SV=2	1	2	2	2	3.2	123.34	6995.5	1952.1	3.58358
Q9NS91	E3 ubiquitin-protein ligase RAD18	RAD18	FUNCTION: E3 ubiquitin-protein ligase involved in postreplication repair of UV-damaged DNA. Postreplication repair functions in gap-filling of a daughter strand on replication of damaged DNA. Associates to the E2 ubiquitin conjugating enzyme UBE2B to form the UBE2B-RAD18 ubiquitin ligase complex involved in mono-ubiquitination of DNA-associated PCNA on 'Lys-164'. Has ssDNA binding activity. {ECO:…	sp|Q9NS91|RAD18_HUMAN	sp|Q9NS91|RAD18_HUMAN E3 ubiquitin-protein ligase RAD18 OS=Homo sapiens OX=9606 GN=RAD18 PE=1 SV=2	1	8	8	8	24	56.222	509130	142240	3.57937
Q16401	26S proteasome non-ATPase regulatory subunit 5	PSMD5	FUNCTION: Acts as a chaperone during the assembly of the 26S proteasome, specifically of the base subcomplex of the PA700/19S regulatory complex (RC). In the initial step of the base subcomplex assembly is part of an intermediate PSMD5:PSMC2:PSMC1:PSMD2 module which probably assembles with a PSMD10:PSMC4:PSMC5:PAAF1 module followed by dissociation of PSMD5. {ECO:0000269|PubMed:19412159, ECO:00002…	sp|Q16401|PSMD5_HUMAN	sp|Q16401|PSMD5_HUMAN 26S proteasome non-ATPase regulatory subunit 5 OS=Homo sapiens OX=9606 GN=PSMD5 PE=1 SV=3	1	13	13	13	35.7	56.195	1439400	403000	3.57171
Q8N3X1	Formin-binding protein 4	FNBP4		sp|Q8N3X1|FNBP4_HUMAN	sp|Q8N3X1|FNBP4_HUMAN Formin-binding protein 4 OS=Homo sapiens OX=9606 GN=FNBP4 PE=1 SV=3	1	4	4	4	6	110.26	189770	53572	3.54234
Q9UHD2	Serine/threonine-protein kinase TBK1	TBK1	FUNCTION: Serine/threonine kinase that plays an essential role in regulating inflammatory responses to foreign agents (PubMed:12692549, PubMed:14703513, PubMed:18583960, PubMed:12702806, PubMed:15367631, PubMed:10581243, PubMed:11839743, PubMed:15485837, PubMed:21138416, PubMed:25636800, PubMed:23453971, PubMed:23453972, PubMed:23746807, PubMed:26611359). Following activation of toll-like recepto…	sp|Q9UHD2|TBK1_HUMAN	sp|Q9UHD2|TBK1_HUMAN Serine/threonine-protein kinase TBK1 OS=Homo sapiens OX=9606 GN=TBK1 PE=1 SV=1	1	10	10	10	16.3	83.641	1027400	290380	3.53812
P00492	Hypoxanthine-guanine phosphoribosyltransferase	HPRT1	FUNCTION: Converts guanine to guanosine monophosphate, and hypoxanthine to inosine monophosphate. Transfers the 5-phosphoribosyl group from 5-phosphoribosylpyrophosphate onto the purine. Plays a central role in the generation of purine nucleotides through the purine salvage pathway.	sp|P00492|HPRT_HUMAN	sp|P00492|HPRT_HUMAN Hypoxanthine-guanine phosphoribosyltransferase OS=Homo sapiens OX=9606 GN=HPRT1 PE=1 SV=2	1	7	7	7	39.9	24.579	9076000	2566600	3.5362
Q9Y6Y8	SEC23-interacting protein	SEC23IP	FUNCTION: Plays a role in the organization of endoplasmic reticulum exit sites. Specifically binds to phosphatidylinositol 3-phosphate (PI(3)P), phosphatidylinositol 4-phosphate (PI(4)P) and phosphatidylinositol 5-phosphate (PI(5)P). {ECO:0000269|PubMed:10400679, ECO:0000269|PubMed:15623529, ECO:0000269|PubMed:22922100}.	sp|Q9Y6Y8|S23IP_HUMAN	sp|Q9Y6Y8|S23IP_HUMAN SEC23-interacting protein OS=Homo sapiens OX=9606 GN=SEC23IP PE=1 SV=1	1	14	14	14	20.1	111.08	3270400	925070	3.5353
Q12846	Syntaxin-4	STX4	FUNCTION: Plasma membrane t-SNARE that mediates docking of transport vesicles. Necessary for the translocation of SLC2A4 from intracellular vesicles to the plasma membrane. Together with STXB3 and VAMP2, may also play a role in docking/fusion of intracellular GLUT4-containing vesicles with the cell surface in adipocytes (By similarity). May also play a role in docking of synaptic vesicles at pres…	sp|Q12846|STX4_HUMAN	sp|Q12846|STX4_HUMAN Syntaxin-4 OS=Homo sapiens OX=9606 GN=STX4 PE=1 SV=2	1	5	5	5	24.6	34.18	1400800	399620	3.50533
Q8WUX9	Charged multivesicular body protein 7	CHMP7	FUNCTION: ESCRT-III-like protein required to recruit the ESCRT-III complex to the nuclear envelope during late anaphase (PubMed:26040712). Together with SPAST, the ESCRT-III complex promotes nuclear envelope sealing and mitotic spindle disassembly during late anaphase (PubMed:26040712). Plays a role in the endosomal sorting pathway (PubMed:16856878). {ECO:0000269|PubMed:16856878, ECO:0000269|PubM…	sp|Q8WUX9|CHMP7_HUMAN	sp|Q8WUX9|CHMP7_HUMAN Charged multivesicular body protein 7 OS=Homo sapiens OX=9606 GN=CHMP7 PE=1 SV=1	1	2	2	2	4.9	50.91	25345	7250.4	3.49567
Q86XI2	Condensin-2 complex subunit G2	NCAPG2	FUNCTION: Regulatory subunit of the condensin-2 complex, a complex which establishes mitotic chromosome architecture and is involved in physical rigidity of the chromatid axis. {ECO:0000269|PubMed:14532007, ECO:0000269|PubMed:30609410}.	sp|Q86XI2|CNDG2_HUMAN	sp|Q86XI2|CNDG2_HUMAN Condensin-2 complex subunit G2 OS=Homo sapiens OX=9606 GN=NCAPG2 PE=1 SV=1	1	7	7	7	8.7	130.96	455990	131210	3.47527
P83731	60S ribosomal protein L24	RPL24		sp|P83731|RL24_HUMAN	sp|P83731|RL24_HUMAN 60S ribosomal protein L24 OS=Homo sapiens OX=9606 GN=RPL24 PE=1 SV=1	1	8	8	8	37.6	17.779	7851600	2271500	3.45657
P17301	Integrin alpha-2	ITGA2	FUNCTION: Integrin alpha-2/beta-1 is a receptor for laminin, collagen, collagen C-propeptides, fibronectin and E-cadherin. It recognizes the proline-hydroxylated sequence G-F-P-G-E-R in collagen. It is responsible for adhesion of platelets and other cells to collagens, modulation of collagen and collagenase gene expression, force generation and organization of newly synthesized extracellular matr…	sp|P17301|ITA2_HUMAN	sp|P17301|ITA2_HUMAN Integrin alpha-2 OS=Homo sapiens OX=9606 GN=ITGA2 PE=1 SV=2	1	16	16	16	20.8	129.29	3695500	1075100	3.43735
Q14320	Protein FAM50A	FAM50A	FUNCTION: May be a DNA-binding protein or transcriptional factor. {ECO:0000269|PubMed:9339379}.	sp|Q14320|FA50A_HUMAN;sp|Q9Y247|FA50B_HUMAN	sp|Q14320|FA50A_HUMAN Protein FAM50A OS=Homo sapiens OX=9606 GN=FAM50A PE=1 SV=2	2	8	8	8	28.9	40.241	3153100	918150	3.43419
Q9UJA5	tRNA (adenine(58)-N(1))-methyltransferase non-catalytic subunit TRM6	TRMT6	FUNCTION: Substrate-binding subunit of tRNA (adenine-N(1)-)-methyltransferase, which catalyzes the formation of N(1)-methyladenine at position 58 (m1A58) in initiator methionyl-tRNA (PubMed:16043508). Together with the TRMT61A catalytic subunit, part of a mRNA N(1)-methyltransferase complex that mediates methylation of adenosine residues at the N(1) position of a small subset of mRNAs: N(1) methy…	sp|Q9UJA5|TRM6_HUMAN	sp|Q9UJA5|TRM6_HUMAN tRNA (adenine(58)-N(1))-methyltransferase non-catalytic subunit TRM6 OS=Homo sapiens OX=9606 GN=TRMT6 PE=1 SV=1	1	5	5	5	13.7	55.799	761140	222430	3.42193
Q4VCS5	Angiomotin	AMOT	FUNCTION: Plays a central role in tight junction maintenance via the complex formed with ARHGAP17, which acts by regulating the uptake of polarity proteins at tight junctions. Appears to regulate endothelial cell migration and tube formation. May also play a role in the assembly of endothelial cell-cell junctions. {ECO:0000269|PubMed:11257124, ECO:0000269|PubMed:16678097}.	sp|Q4VCS5|AMOT_HUMAN	sp|Q4VCS5|AMOT_HUMAN Angiomotin OS=Homo sapiens OX=9606 GN=AMOT PE=1 SV=1	1	15	15	14	17.7	118.08	766360	224130	3.41927
P49674	Casein kinase I isoform epsilon	CSNK1E	FUNCTION: Casein kinases are operationally defined by their preferential utilization of acidic proteins such as caseins as substrates. Can phosphorylate a large number of proteins. Participates in Wnt signaling. Phosphorylates DVL1 and DVL2. Central component of the circadian clock. In balance with PP1, determines the circadian period length, through the regulation of the speed and rhythmicity of…	sp|P49674|KC1E_HUMAN	sp|P49674|KC1E_HUMAN Casein kinase I isoform epsilon OS=Homo sapiens OX=9606 GN=CSNK1E PE=1 SV=1	1	6	6	2	18.8	47.315	598100	175580	3.40642
P23458	Tyrosine-protein kinase JAK1	JAK1	FUNCTION: Tyrosine kinase of the non-receptor type, involved in the IFN-alpha/beta/gamma signal pathway (PubMed:7615558). Kinase partner for the interleukin (IL)-2 receptor (PubMed:11909529) as well as interleukin (IL)-10 receptor (PubMed:12133952). {ECO:0000269|PubMed:11909529, ECO:0000269|PubMed:7615558}.	sp|P23458|JAK1_HUMAN	sp|P23458|JAK1_HUMAN Tyrosine-protein kinase JAK1 OS=Homo sapiens OX=9606 GN=JAK1 PE=1 SV=2	1	8	8	8	8.8	133.28	1310400	385050	3.40319
Q5SY16	Polynucleotide 5-hydroxyl-kinase NOL9	NOL9	FUNCTION: Polynucleotide 5'-kinase involved in rRNA processing. The kinase activity is required for the processing of the 32S precursor into 5.8S and 28S rRNAs, more specifically for the generation of the major 5.8S(S) form. In vitro, has both DNA and RNA 5'-kinase activities. Probably binds RNA. {ECO:0000269|PubMed:21063389}.	sp|Q5SY16|NOL9_HUMAN	sp|Q5SY16|NOL9_HUMAN Polynucleotide 5-hydroxyl-kinase NOL9 OS=Homo sapiens OX=9606 GN=NOL9 PE=1 SV=1	1	4	4	4	7.4	79.322	581500	170940	3.40178
Q5VIR6	Vacuolar protein sorting-associated protein 53 homolog	VPS53	FUNCTION: Acts as component of the GARP complex that is involved in retrograde transport from early and late endosomes to the trans-Golgi network (TGN). The GARP complex is required for the maintenance of the cycling of mannose 6-phosphate receptors between the TGN and endosomes, this cycling is necessary for proper lysosomal sorting of acid hydrolases such as CTSD (PubMed:15878329, PubMed:183675…	sp|Q5VIR6|VPS53_HUMAN	sp|Q5VIR6|VPS53_HUMAN Vacuolar protein sorting-associated protein 53 homolog OS=Homo sapiens OX=9606 GN=VPS53 PE=1 SV=2	1	9	9	9	15.3	94.404	593760	175280	3.38749
Q8WTT2	Nucleolar complex protein 3 homolog	NOC3L	FUNCTION: May be required for adipogenesis. {ECO:0000250}.	sp|Q8WTT2|NOC3L_HUMAN	sp|Q8WTT2|NOC3L_HUMAN Nucleolar complex protein 3 homolog OS=Homo sapiens OX=9606 GN=NOC3L PE=1 SV=1	1	2	2	2	2.8	92.547	7454.8	2205.6	3.37994
P48059	LIM and senescent cell antigen-like-containing domain protein 1	LIMS1	FUNCTION: Adapter protein in a cytoplasmic complex linking beta-integrins to the actin cytoskeleton, bridges the complex to cell surface receptor tyrosine kinases and growth factor receptors. Involved in the regulation of cell survival, cell proliferation and cell differentiation.	sp|P48059|LIMS1_HUMAN;sp|Q7Z4I7|LIMS2_HUMAN	sp|P48059|LIMS1_HUMAN LIM and senescent cell antigen-like-containing domain protein 1 OS=Homo sapiens OX=9606 GN=LIMS1 PE=1 SV=4	2	8	8	8	35.1	37.251	1174900	347920	3.37693
A3KN83	Protein strawberry notch homolog 1	SBNO1		sp|A3KN83|SBNO1_HUMAN;sp|Q9Y2G9|SBNO2_HUMAN	sp|A3KN83|SBNO1_HUMAN Protein strawberry notch homolog 1 OS=Homo sapiens OX=9606 GN=SBNO1 PE=1 SV=1;sp|Q9Y2G9|SBNO2_HUMAN Protein strawberry notch homolog 2 OS=Homo sapiens OX=9606 GN=SBNO2 PE=2 SV=3	2	4	4	4	3.7	154.31	300220	88932	3.37584
Q9H6S0	3-5 RNA helicase YTHDC2	YTHDC2	FUNCTION: 3'-5' RNA helicase that plays a key role in the male and female germline by promoting transition from mitotic to meiotic divisions in stem cells (PubMed:26318451, PubMed:29033321). Specifically recognizes and binds N6-methyladenosine (m6A)-containing RNAs, a modification present at internal sites of mRNAs and some non-coding RNAs that plays a role in the efficiency of RNA processing and…	sp|Q9H6S0|YTDC2_HUMAN	sp|Q9H6S0|YTDC2_HUMAN 3-5 RNA helicase YTHDC2 OS=Homo sapiens OX=9606 GN=YTHDC2 PE=1 SV=2	1	22	22	22	22.4	160.25	3485900	1033800	3.37193
Q9H074	Polyadenylate-binding protein-interacting protein 1	PAIP1	FUNCTION: Acts as a coactivator in the regulation of translation initiation of poly(A)-containing mRNAs. Its stimulatory activity on translation is mediated via its action on PABPC1. Competes with PAIP2 for binding to PABPC1. Its association with EIF4A and PABPC1 may potentiate contacts between mRNA termini. May also be involved in translationally coupled mRNA turnover. Implicated with other RNA-…	sp|Q9H074|PAIP1_HUMAN	sp|Q9H074|PAIP1_HUMAN Polyadenylate-binding protein-interacting protein 1 OS=Homo sapiens OX=9606 GN=PAIP1 PE=1 SV=1	1	9	9	9	18.8	53.524	1683300	500040	3.36633
Q5JSL3	Dedicator of cytokinesis protein 11	DOCK11	FUNCTION: Guanine nucleotide-exchange factor (GEF) that activates CDC42 by exchanging bound GDP for free GTP. Required for marginal zone (MZ) B-cell development, is associated with early bone marrow B-cell development, MZ B-cell formation, MZ B-cell number and marginal metallophilic macrophages morphology. Facilitates filopodia formation through the activation of CDC42. {ECO:0000250|UniProtKB:A2A…	sp|Q5JSL3|DOC11_HUMAN	sp|Q5JSL3|DOC11_HUMAN Dedicator of cytokinesis protein 11 OS=Homo sapiens OX=9606 GN=DOCK11 PE=1 SV=2	1	12	12	11	9.2	237.67	552610	164220	3.36506
O15040	Tectonin beta-propeller repeat-containing protein 2	TECPR2	FUNCTION: Probably plays a role as positive regulator of autophagy. {ECO:0000269|PubMed:23176824}.	sp|O15040|TCPR2_HUMAN	sp|O15040|TCPR2_HUMAN Tectonin beta-propeller repeat-containing protein 2 OS=Homo sapiens OX=9606 GN=TECPR2 PE=1 SV=4	1	3	3	3	3.3	153.85	118250	35166	3.36262
Q96GA3	Protein LTV1 homolog	LTV1		sp|Q96GA3|LTV1_HUMAN	sp|Q96GA3|LTV1_HUMAN Protein LTV1 homolog OS=Homo sapiens OX=9606 GN=LTV1 PE=1 SV=1	1	8	8	8	17.1	54.854	544670	162300	3.35595
Q86YP4	Transcriptional repressor p66-alpha	GATAD2A	FUNCTION: Transcriptional repressor. Enhances MBD2-mediated repression. Efficient repression requires the presence of GATAD2B. {ECO:0000269|PubMed:12183469, ECO:0000269|PubMed:16415179}.	sp|Q86YP4|P66A_HUMAN	sp|Q86YP4|P66A_HUMAN Transcriptional repressor p66-alpha OS=Homo sapiens OX=9606 GN=GATAD2A PE=1 SV=1	1	7	5	5	16.7	68.062	1478360	441110	3.35145
P50748	Kinetochore-associated protein 1	KNTC1	FUNCTION: Essential component of the mitotic checkpoint, which prevents cells from prematurely exiting mitosis. Required for the assembly of the dynein-dynactin and MAD1-MAD2 complexes onto kinetochores (PubMed:11146660, PubMed:11590237, PubMed:15824131). Its function related to the spindle assembly machinery is proposed to depend on its association in the mitotic RZZ complex. {ECO:0000269|PubMed…	sp|P50748|KNTC1_HUMAN	sp|P50748|KNTC1_HUMAN Kinetochore-associated protein 1 OS=Homo sapiens OX=9606 GN=KNTC1 PE=1 SV=1	1	7	7	7	4.6	250.75	382530	114290	3.34701
Q8WUU5	GATA zinc finger domain-containing protein 1	GATAD1	FUNCTION: Component of some chromatin complex recruited to chromatin sites methylated 'Lys-4' of histone H3 (H3K4me), with a preference for trimethylated form (H3K4me3). {ECO:0000269|PubMed:20850016}.	sp|Q8WUU5|GATD1_HUMAN	sp|Q8WUU5|GATD1_HUMAN GATA zinc finger domain-containing protein 1 OS=Homo sapiens OX=9606 GN=GATAD1 PE=1 SV=1	1	2	2	2	14.9	28.69	127790	38210	3.34441
Q9BT17	Mitochondrial ribosome-associated GTPase 1	MTG1	FUNCTION: Plays a role in the regulation of the mitochondrial ribosome assembly and of translational activity. Displays mitochondrial GTPase activity. {ECO:0000269|PubMed:23396448}.	sp|Q9BT17|MTG1_HUMAN	sp|Q9BT17|MTG1_HUMAN Mitochondrial ribosome-associated GTPase 1 OS=Homo sapiens OX=9606 GN=MTG1 PE=1 SV=2	1	2	2	2	9	37.236	397270	118860	3.34234
Q13243	Serine/arginine-rich splicing factor 5	SRSF5	FUNCTION: Plays a role in constitutive splicing and can modulate the selection of alternative splice sites.	sp|Q13243|SRSF5_HUMAN	sp|Q13243|SRSF5_HUMAN Serine/arginine-rich splicing factor 5 OS=Homo sapiens OX=9606 GN=SRSF5 PE=1 SV=1	1	6	5	5	21	31.263	1162100	347990	3.33946
Q9H078	Caseinolytic peptidase B protein homolog	CLPB	FUNCTION: May function as a regulatory ATPase and be related to secretion/protein trafficking process.	sp|Q9H078|CLPB_HUMAN	sp|Q9H078|CLPB_HUMAN Caseinolytic peptidase B protein homolog OS=Homo sapiens OX=9606 GN=CLPB PE=1 SV=1	1	13	13	13	24.6	78.728	3953000	1191300	3.31822
Q15750	TGF-beta-activated kinase 1 and MAP3K7-binding protein 1	TAB1	FUNCTION: May be an important signaling intermediate between TGFB receptors and MAP3K7/TAK1. May play an important role in mammalian embryogenesis.	sp|Q15750|TAB1_HUMAN	sp|Q15750|TAB1_HUMAN TGF-beta-activated kinase 1 and MAP3K7-binding protein 1 OS=Homo sapiens OX=9606 GN=TAB1 PE=1 SV=1	1	11	11	11	36.7	54.643	2815800	848610	3.31813
Q8WVJ2	NudC domain-containing protein 2	NUDCD2	FUNCTION: May regulate the LIS1/dynein pathway by stabilizing LIS1 with Hsp90 chaperone. {ECO:0000269|PubMed:20133715}.	sp|Q8WVJ2|NUDC2_HUMAN	sp|Q8WVJ2|NUDC2_HUMAN NudC domain-containing protein 2 OS=Homo sapiens OX=9606 GN=NUDCD2 PE=1 SV=1	1	3	3	3	24.2	17.676	703610	213480	3.29591
Q6EEV4	DNA-directed RNA polymerase II subunit GRINL1A, isoforms 4/5	POLR2M		sp|Q6EEV4|GL1AD_HUMAN	sp|Q6EEV4|GL1AD_HUMAN DNA-directed RNA polymerase II subunit GRINL1A, isoforms 4/5 OS=Homo sapiens OX=9606 GN=POLR2M PE=1 SV=1	1	2	2	2	25	15.131	288400	87551	3.29408
Q96SI1	BTB/POZ domain-containing protein KCTD15	KCTD15	FUNCTION: During embryonic development, interferes with neural crest formation (By similarity). Inhibits AP2 transcriptional activity by interaction with its activation domain. {ECO:0000250, ECO:0000269|PubMed:23382213}.	sp|Q96SI1|KCD15_HUMAN;sp|Q719H9|KCTD1_HUMAN	sp|Q96SI1|KCD15_HUMAN BTB/POZ domain-containing protein KCTD15 OS=Homo sapiens OX=9606 GN=KCTD15 PE=1 SV=1	2	3	3	3	17.7	31.942	309060	94095	3.28455
P63272	Transcription elongation factor SPT4	SUPT4H1	FUNCTION: Component of the DRB sensitivity-inducing factor complex (DSIF complex), which regulates mRNA processing and transcription elongation by RNA polymerase II. DSIF positively regulates mRNA capping by stimulating the mRNA guanylyltransferase activity of RNGTT/CAP1A. DSIF also acts cooperatively with the negative elongation factor complex (NELF complex) to enhance transcriptional pausing at…	sp|P63272|SPT4H_HUMAN	sp|P63272|SPT4H_HUMAN Transcription elongation factor SPT4 OS=Homo sapiens OX=9606 GN=SUPT4H1 PE=1 SV=1	1	3	3	3	38.5	13.193	716710	218260	3.28374
Q96PD2	Discoidin, CUB and LCCL domain-containing protein 2	DCBLD2		sp|Q96PD2|DCBD2_HUMAN	sp|Q96PD2|DCBD2_HUMAN Discoidin, CUB and LCCL domain-containing protein 2 OS=Homo sapiens OX=9606 GN=DCBLD2 PE=1 SV=1	1	4	4	4	9.7	85.034	189950	58002	3.27489
Q9NXR7	BRISC and BRCA1-A complex member 2	BABAM2	FUNCTION: Component of the BRCA1-A complex, a complex that specifically recognizes 'Lys-63'-linked ubiquitinated histones H2A and H2AX at DNA lesions sites, leading to target the BRCA1-BARD1 heterodimer to sites of DNA damage at double-strand breaks (DSBs). The BRCA1-A complex also possesses deubiquitinase activity that specifically removes 'Lys-63'-linked ubiquitin on histones H2A and H2AX (PubM…	sp|Q9NXR7|BABA2_HUMAN	sp|Q9NXR7|BABA2_HUMAN BRISC and BRCA1-A complex member 2 OS=Homo sapiens OX=9606 GN=BABAM2 PE=1 SV=2	1	4	4	4	13.6	43.551	714230	218380	3.27058
Q6YP21	Kynurenine--oxoglutarate transaminase 3	KYAT3	FUNCTION: Catalyzes the irreversible transamination of the L-tryptophan metabolite L-kynurenine to form kynurenic acid (KA). May catalyze the beta-elimination of S-conjugates and Se-conjugates of L-(seleno)cysteine, resulting in the cleavage of the C-S or C-Se bond (By similarity). Has transaminase activity towards L-kynurenine, tryptophan, phenylalanine, serine, cysteine, methionine, histidine, …	sp|Q6YP21|KAT3_HUMAN	sp|Q6YP21|KAT3_HUMAN Kynurenine--oxoglutarate transaminase 3 OS=Homo sapiens OX=9606 GN=KYAT3 PE=1 SV=1	1	7	7	7	20	51.4	1511100	462470	3.26746
P30626	Sorcin	SRI	FUNCTION: Calcium-binding protein that modulates excitation-contraction coupling in the heart. Contributes to calcium homeostasis in the heart sarcoplasmic reticulum. Modulates the activity of RYR2 calcium channels. {ECO:0000269|PubMed:17699613}.	sp|P30626|SORCN_HUMAN	sp|P30626|SORCN_HUMAN Sorcin OS=Homo sapiens OX=9606 GN=SRI PE=1 SV=1	1	4	4	4	25.3	21.676	1147600	351360	3.26617
O43306	Adenylate cyclase type 6	ADCY6	FUNCTION: Catalyzes the formation of the signaling molecule cAMP downstream of G protein-coupled receptors (PubMed:17916776, PubMed:17110384). Functions in signaling cascades downstream of beta-adrenergic receptors in the heart and in vascular smooth muscle cells (PubMed:17916776). Functions in signaling cascades downstream of the vasopressin receptor in the kidney and has a role in renal water r…	sp|O43306|ADCY6_HUMAN;sp|O95622|ADCY5_HUMAN	sp|O43306|ADCY6_HUMAN Adenylate cyclase type 6 OS=Homo sapiens OX=9606 GN=ADCY6 PE=1 SV=2	2	6	6	6	7.1	130.61	489040	149860	3.26331
Q9BQ95	Evolutionarily conserved signaling intermediate in Toll pathway, mitochondrial	ECSIT	FUNCTION: Adapter protein of the Toll-like and IL-1 receptor signaling pathway that is involved in the activation of NF-kappa-B via MAP3K1. Promotes proteolytic activation of MAP3K1. Involved in the BMP signaling pathway. Required for normal embryonic development (By similarity). {ECO:0000250}.; FUNCTION: Required for efficient assembly of mitochondrial NADH:ubiquinone oxidoreductase.	sp|Q9BQ95|ECSIT_HUMAN	sp|Q9BQ95|ECSIT_HUMAN Evolutionarily conserved signaling intermediate in Toll pathway, mitochondrial OS=Homo sapiens OX=9606 GN=ECSIT PE=1 SV=1	1	5	5	5	14.4	49.148	496160	152070	3.26271
P07858	Cathepsin B	CTSB	FUNCTION: Thiol protease which is believed to participate in intracellular degradation and turnover of proteins (PubMed:12220505). Cleaves matrix extracellular phosphoglycoprotein MEPE (PubMed:12220505). Involved in the solubilization of cross-linked TG/thyroglobulin in the thyroid follicle lumen (By similarity). Has also been implicated in tumor invasion and metastasis (PubMed:3972105). {ECO:000…	sp|P07858|CATB_HUMAN	sp|P07858|CATB_HUMAN Cathepsin B OS=Homo sapiens OX=9606 GN=CTSB PE=1 SV=3	1	9	9	9	31.6	37.821	5018200	1542500	3.25329
P37268	Squalene synthase	FDFT1	FUNCTION: Catalyzes the condensation of 2 farnesyl pyrophosphate (FPP) moieties to form squalene. Proceeds in two distinct steps. In the first half-reaction, two molecules of FPP react to form the stable presqualene diphosphate intermediate (PSQPP), with concomitant release of a proton and a molecule of inorganic diphosphate. In the second half-reaction, PSQPP undergoes heterolysis, isomerization…	sp|P37268|FDFT_HUMAN	sp|P37268|FDFT_HUMAN Squalene synthase OS=Homo sapiens OX=9606 GN=FDFT1 PE=1 SV=1	1	9	9	9	24.5	48.115	2675000	824880	3.2429
Q96RT7	Gamma-tubulin complex component 6	TUBGCP6	FUNCTION: Gamma-tubulin complex is necessary for microtubule nucleation at the centrosome. {ECO:0000269|PubMed:11694571}.	sp|Q96RT7|GCP6_HUMAN	sp|Q96RT7|GCP6_HUMAN Gamma-tubulin complex component 6 OS=Homo sapiens OX=9606 GN=TUBGCP6 PE=1 SV=3	1	3	3	3	3	200.5	278380	86063	3.23461
O95182	NADH dehydrogenase [ubiquinone] 1 alpha subcomplex subunit 7	NDUFA7	FUNCTION: Accessory subunit of the mitochondrial membrane respiratory chain NADH dehydrogenase (Complex I), that is believed not to be involved in catalysis. Complex I functions in the transfer of electrons from NADH to the respiratory chain. The immediate electron acceptor for the enzyme is believed to be ubiquinone. {ECO:0000269|PubMed:27626371}.	sp|O95182|NDUA7_HUMAN	sp|O95182|NDUA7_HUMAN NADH dehydrogenase [ubiquinone] 1 alpha subcomplex subunit 7 OS=Homo sapiens OX=9606 GN=NDUFA7 PE=1 SV=3	1	5	5	5	35.4	12.551	1309200	405050	3.23219
Q9NVH0	Exonuclease 3-5 domain-containing protein 2	EXD2	FUNCTION: Exonuclease that has both 3'-5' exoribonuclease and exodeoxyribonuclease activities, depending on the divalent metal cation used as cofactor (PubMed:29335528, PubMed:31127291). In presence of Mg(2+), only shows 3'-5' exoribonuclease activity, while it shows both exoribonuclease and exodeoxyribonuclease activities in presence of Mn(2+) (PubMed:29335528, PubMed:31127291). Acts as an exori…	sp|Q9NVH0|EXD2_HUMAN	sp|Q9NVH0|EXD2_HUMAN Exonuclease 3-5 domain-containing protein 2 OS=Homo sapiens OX=9606 GN=EXD2 PE=1 SV=2	1	17	17	17	37.2	70.352	2518900	781270	3.22411
P52756	RNA-binding protein 5	RBM5	FUNCTION: Component of the spliceosome A complex. Regulates alternative splicing of a number of mRNAs. May modulate splice site pairing after recruitment of the U1 and U2 snRNPs to the 5' and 3' splice sites of the intron. May both positively and negatively regulate apoptosis by regulating the alternative splicing of several genes involved in this process, including FAS and CASP2/caspase-2. In th…	sp|P52756|RBM5_HUMAN	sp|P52756|RBM5_HUMAN RNA-binding protein 5 OS=Homo sapiens OX=9606 GN=RBM5 PE=1 SV=2	1	2	2	2	3.3	92.153	142680	44568	3.2014
Q6ZXV5	Protein O-mannosyl-transferase TMTC3	TMTC3	FUNCTION: Transfers mannosyl residues to the hydroxyl group of serine or threonine residues. The 4 members of the TMTC family are O-mannosyl-transferases dedicated primarily to the cadherin superfamily, each member seems to have a distinct role in decorating the cadherin domains with O-linked mannose glycans at specific regions. Also acts as O-mannosyl-transferase on other proteins such as PDIA3 …	sp|Q6ZXV5|TMTC3_HUMAN	sp|Q6ZXV5|TMTC3_HUMAN Protein O-mannosyl-transferase TMTC3 OS=Homo sapiens OX=9606 GN=TMTC3 PE=1 SV=2	1	15	15	15	18.8	104.01	4562600	1427000	3.19734
Q5SZK8	FRAS1-related extracellular matrix protein 2	FREM2	FUNCTION: Extracellular matrix protein required for maintenance of the integrity of the skin epithelium and for maintenance of renal epithelia (PubMed:15838507). Required for epidermal adhesion (PubMed:15838507). Involved in the development of eyelids and the anterior segment of the eyeballs (PubMed:29688405, PubMed:30802441). {ECO:0000269|PubMed:15838507, ECO:0000269|PubMed:29688405, ECO:0000269…	sp|Q5SZK8|FREM2_HUMAN	sp|Q5SZK8|FREM2_HUMAN FRAS1-related extracellular matrix protein 2 OS=Homo sapiens OX=9606 GN=FREM2 PE=1 SV=3	1	1	1	1	0.4	351.16	127760	40041	3.19073
Q8WTS6	Histone-lysine N-methyltransferase SETD7	SETD7	FUNCTION: Histone methyltransferase that specifically monomethylates 'Lys-4' of histone H3. H3 'Lys-4' methylation represents a specific tag for epigenetic transcriptional activation. Plays a central role in the transcriptional activation of genes such as collagenase or insulin. Recruited by IPF1/PDX-1 to the insulin promoter, leading to activate transcription. Has also methyltransferase activity…	sp|Q8WTS6|SETD7_HUMAN	sp|Q8WTS6|SETD7_HUMAN Histone-lysine N-methyltransferase SETD7 OS=Homo sapiens OX=9606 GN=SETD7 PE=1 SV=1	1	5	5	5	21.6	40.72	243100	76373	3.18306
Q9BUP3	Oxidoreductase HTATIP2	HTATIP2	FUNCTION: Oxidoreductase required for tumor suppression. NAPDH-bound form inhibits nuclear import by competing with nuclear import substrates for binding to a subset of nuclear transport receptors. May act as a redox sensor linked to transcription through regulation of nuclear import. Isoform 1 is a metastasis suppressor with proapoptotic as well as antiangiogenic properties. Isoform 2 has an ant…	sp|Q9BUP3|HTAI2_HUMAN	sp|Q9BUP3|HTAI2_HUMAN Oxidoreductase HTATIP2 OS=Homo sapiens OX=9606 GN=HTATIP2 PE=1 SV=2	1	3	3	3	18.6	27.049	395080	124150	3.18228
P83916	Chromobox protein homolog 1	CBX1	FUNCTION: Component of heterochromatin. Recognizes and binds histone H3 tails methylated at 'Lys-9', leading to epigenetic repression. Interaction with lamin B receptor (LBR) can contribute to the association of the heterochromatin with the inner nuclear membrane. {ECO:0000250|UniProtKB:P83917}.	sp|P83916|CBX1_HUMAN	sp|P83916|CBX1_HUMAN Chromobox protein homolog 1 OS=Homo sapiens OX=9606 GN=CBX1 PE=1 SV=1	1	7	6	6	42.2	21.418	2615300	822330	3.18035
P82932	28S ribosomal protein S6, mitochondrial	MRPS6		sp|P82932|RT06_HUMAN	sp|P82932|RT06_HUMAN 28S ribosomal protein S6, mitochondrial OS=Homo sapiens OX=9606 GN=MRPS6 PE=1 SV=3	1	4	4	4	32.8	14.226	795990	250370	3.17925
Q96T21	Selenocysteine insertion sequence-binding protein 2	SECISBP2	FUNCTION: Binds to the SECIS element in the 3'-UTR of some mRNAs encoding selenoproteins. Binding is stimulated by SELB.	sp|Q96T21|SEBP2_HUMAN	sp|Q96T21|SEBP2_HUMAN Selenocysteine insertion sequence-binding protein 2 OS=Homo sapiens OX=9606 GN=SECISBP2 PE=1 SV=2	1	5	5	5	10.3	95.461	231520	73159	3.16461
O75534	Cold shock domain-containing protein E1	CSDE1	FUNCTION: RNA-binding protein. Required for internal initiation of translation of human rhinovirus RNA. May be involved in translationally coupled mRNA turnover. Implicated with other RNA-binding proteins in the cytoplasmic deadenylation/translational and decay interplay of the FOS mRNA mediated by the major coding-region determinant of instability (mCRD) domain. Required for efficient formation …	sp|O75534|CSDE1_HUMAN	sp|O75534|CSDE1_HUMAN Cold shock domain-containing protein E1 OS=Homo sapiens OX=9606 GN=CSDE1 PE=1 SV=2	1	21	21	21	35.1	88.884	6492100	2051600	3.16441
Q8NBJ7	Inactive C-alpha-formylglycine-generating enzyme 2	SUMF2	FUNCTION: Lacks formylglycine generating activity and is unable to convert newly synthesized inactive sulfatases to their active form. Inhibits the activation of sulfatases by SUMF1. {ECO:0000269|PubMed:12757706, ECO:0000269|PubMed:15708861, ECO:0000269|PubMed:15962010}.	sp|Q8NBJ7|SUMF2_HUMAN	sp|Q8NBJ7|SUMF2_HUMAN Inactive C-alpha-formylglycine-generating enzyme 2 OS=Homo sapiens OX=9606 GN=SUMF2 PE=1 SV=2	1	9	9	9	28.9	33.843	4332000	1369700	3.16274
P05165	Propionyl-CoA carboxylase alpha chain, mitochondrial	PCCA	FUNCTION: This is one of the 2 subunits of the biotin-dependent propionyl-CoA carboxylase (PCC), a mitochondrial enzyme involved in the catabolism of odd chain fatty acids, branched-chain amino acids isoleucine, threonine, methionine, and valine and other metabolites (PubMed:8434582, PubMed:6765947). Propionyl-CoA carboxylase catalyzes the carboxylation of propionyl-CoA/propanoyl-CoA to D-methylm…	sp|P05165|PCCA_HUMAN	sp|P05165|PCCA_HUMAN Propionyl-CoA carboxylase alpha chain, mitochondrial OS=Homo sapiens OX=9606 GN=PCCA PE=1 SV=4	1	10	10	10	19.8	80.058	1871300	592140	3.16023
Q96GD4	Aurora kinase B	AURKB	FUNCTION: Serine/threonine-protein kinase component of the chromosomal passenger complex (CPC), a complex that acts as a key regulator of mitosis. The CPC complex has essential functions at the centromere in ensuring correct chromosome alignment and segregation and is required for chromatin-induced microtubule stabilization and spindle assembly. Involved in the bipolar attachment of spindle micro…	sp|Q96GD4|AURKB_HUMAN	sp|Q96GD4|AURKB_HUMAN Aurora kinase B OS=Homo sapiens OX=9606 GN=AURKB PE=1 SV=3	1	3	3	3	11.9	39.31	175260	55471	3.15949
Q8TD30	Alanine aminotransferase 2	GPT2	FUNCTION: Catalyzes the reversible transamination between alanine and 2-oxoglutarate to form pyruvate and glutamate. {ECO:0000269|PubMed:11863375}.	sp|Q8TD30|ALAT2_HUMAN;sp|P24298|ALAT1_HUMAN	sp|Q8TD30|ALAT2_HUMAN Alanine aminotransferase 2 OS=Homo sapiens OX=9606 GN=GPT2 PE=1 SV=1	2	9	9	9	31.5	57.903	3055900	969090	3.15337
Q13509	Tubulin beta-3 chain	TUBB3	FUNCTION: Tubulin is the major constituent of microtubules. It binds two moles of GTP, one at an exchangeable site on the beta chain and one at a non-exchangeable site on the alpha chain. TUBB3 plays a critical role in proper axon guidance and mantainance. Binding of NTN1/Netrin-1 to its receptor UNC5C might cause dissociation of UNC5C from polymerized TUBB3 in microtubules and thereby lead to in…	sp|Q13509|TBB3_HUMAN	sp|Q13509|TBB3_HUMAN Tubulin beta-3 chain OS=Homo sapiens OX=9606 GN=TUBB3 PE=1 SV=2	1	14	2	2	37.3	50.432	45724	14536	3.14557
Q8NBT2	Kinetochore protein Spc24	SPC24	FUNCTION: Acts as a component of the essential kinetochore-associated NDC80 complex, which is required for chromosome segregation and spindle checkpoint activity (PubMed:14738735). Required for kinetochore integrity and the organization of stable microtubule binding sites in the outer plate of the kinetochore (PubMed:14738735). The NDC80 complex synergistically enhances the affinity of the SKA1 c…	sp|Q8NBT2|SPC24_HUMAN	sp|Q8NBT2|SPC24_HUMAN Kinetochore protein Spc24 OS=Homo sapiens OX=9606 GN=SPC24 PE=1 SV=3	1	4	4	4	34	22.443	1249400	397380	3.14409
Q8WUA2	Peptidyl-prolyl cis-trans isomerase-like 4	PPIL4	FUNCTION: PPIases accelerate the folding of proteins. It catalyzes the cis-trans isomerization of proline imidic peptide bonds in oligopeptides (By similarity). {ECO:0000250}.	sp|Q8WUA2|PPIL4_HUMAN	sp|Q8WUA2|PPIL4_HUMAN Peptidyl-prolyl cis-trans isomerase-like 4 OS=Homo sapiens OX=9606 GN=PPIL4 PE=1 SV=1	1	8	8	8	20.3	57.224	1412700	450300	3.13724
O76074	cGMP-specific 3,5-cyclic phosphodiesterase	PDE5A	FUNCTION: Plays a role in signal transduction by regulating the intracellular concentration of cyclic nucleotides. This phosphodiesterase catalyzes the specific hydrolysis of cGMP to 5'-GMP (PubMed:9714779, PubMed:15489334). Specifically regulates nitric-oxide-generated cGMP (PubMed:15489334). {ECO:0000269|PubMed:15489334, ECO:0000269|PubMed:9714779}.	sp|O76074|PDE5A_HUMAN	sp|O76074|PDE5A_HUMAN cGMP-specific 3,5-cyclic phosphodiesterase OS=Homo sapiens OX=9606 GN=PDE5A PE=1 SV=2	1	2	2	2	3.3	99.984	37944	12106	3.13431
Q9NYJ8	TGF-beta-activated kinase 1 and MAP3K7-binding protein 2	TAB2	FUNCTION: Adapter linking MAP3K7/TAK1 and TRAF6. Promotes MAP3K7 activation in the IL1 signaling pathway. The binding of 'Lys-63'-linked polyubiquitin chains to TAB2 promotes autophosphorylation of MAP3K7 at 'Thr-187'. Involved in heart development. {ECO:0000269|PubMed:10882101, ECO:0000269|PubMed:11460167, ECO:0000269|PubMed:20493459}.	sp|Q9NYJ8|TAB2_HUMAN	sp|Q9NYJ8|TAB2_HUMAN TGF-beta-activated kinase 1 and MAP3K7-binding protein 2 OS=Homo sapiens OX=9606 GN=TAB2 PE=1 SV=1	1	6	6	6	15.3	76.493	519130	165680	3.13333
O94813	Slit homolog 2 protein	SLIT2	FUNCTION: Thought to act as molecular guidance cue in cellular migration, and function appears to be mediated by interaction with roundabout homolog receptors. During neural development involved in axonal navigation at the ventral midline of the neural tube and projection of axons to different regions. SLIT1 and SLIT2 seem to be essential for midline guidance in the forebrain by acting as repulsi…	sp|O94813|SLIT2_HUMAN	sp|O94813|SLIT2_HUMAN Slit homolog 2 protein OS=Homo sapiens OX=9606 GN=SLIT2 PE=1 SV=1	1	11	11	11	9.7	169.87	1376100	440150	3.12643
Q9NZU5	LIM and cysteine-rich domains protein 1	LMCD1	FUNCTION: Transcriptional cofactor that restricts GATA6 function by inhibiting DNA-binding, resulting in repression of GATA6 transcriptional activation of downstream target genes. Represses GATA6-mediated trans activation of lung- and cardiac tissue-specific promoters. Inhibits DNA-binding by GATA4 and GATA1 to the cTNC promoter (By similarity). Plays a critical role in the development of cardiac…	sp|Q9NZU5|LMCD1_HUMAN	sp|Q9NZU5|LMCD1_HUMAN LIM and cysteine-rich domains protein 1 OS=Homo sapiens OX=9606 GN=LMCD1 PE=1 SV=1	1	9	9	9	27.4	40.832	1435500	459600	3.12337
Q9H4L5	Oxysterol-binding protein-related protein 3	OSBPL3	FUNCTION: Phosphoinositide-binding protein which associates with both cell and endoplasmic reticulum (ER) membranes (PubMed:16143324). Can bind to the ER membrane protein VAPA and recruit VAPA to plasma membrane sites, thus linking these intracellular compartments (PubMed:25447204). The ORP3-VAPA complex stimulates RRAS signaling which in turn attenuates integrin beta-1 (ITGB1) activation at the …	sp|Q9H4L5|OSBL3_HUMAN	sp|Q9H4L5|OSBL3_HUMAN Oxysterol-binding protein-related protein 3 OS=Homo sapiens OX=9606 GN=OSBPL3 PE=1 SV=1	1	8	8	8	14	101.22	1417400	455960	3.10861
Q7Z6L1	Tectonin beta-propeller repeat-containing protein 1	TECPR1	FUNCTION: Tethering factor involved in autophagy. Involved in autophagosome maturation by promoting the autophagosome fusion with lysosomes: acts by associating with both the ATG5-ATG12 conjugate and phosphatidylinositol-3-phosphate (PtdIns(3)P) present at the surface of autophagosomes. Also involved in selective autophagy against bacterial pathogens, by being required for phagophore/preautophago…	sp|Q7Z6L1|TCPR1_HUMAN	sp|Q7Z6L1|TCPR1_HUMAN Tectonin beta-propeller repeat-containing protein 1 OS=Homo sapiens OX=9606 GN=TECPR1 PE=1 SV=1	1	7	7	7	9.6	129.69	246170	79724	3.08778
Q9NZT2	Opioid growth factor receptor	OGFR	FUNCTION: Receptor for opioid growth factor (OGF), also known as Met-enkephalin. Seems to be involved in growth regulation.	sp|Q9NZT2|OGFR_HUMAN	sp|Q9NZT2|OGFR_HUMAN Opioid growth factor receptor OS=Homo sapiens OX=9606 GN=OGFR PE=1 SV=3	1	15	15	15	46.1	73.324	1959100	637580	3.07271
Q8TA86	Retinitis pigmentosa 9 protein	RP9	FUNCTION: Is thought to be a target protein for the PIM1 kinase. May play some roles in B-cell proliferation in association with PIM1 (By similarity). {ECO:0000250}.	sp|Q8TA86|RP9_HUMAN	sp|Q8TA86|RP9_HUMAN Retinitis pigmentosa 9 protein OS=Homo sapiens OX=9606 GN=RP9 PE=1 SV=2	1	3	3	3	16.7	26.106	120410	39323	3.06208
P62487	DNA-directed RNA polymerase II subunit RPB7	POLR2G	FUNCTION: DNA-dependent RNA polymerase catalyzes the transcription of DNA into RNA using the four ribonucleoside triphosphates as substrates. Component of RNA polymerase II which synthesizes mRNA precursors and many functional non-coding RNAs. Pol II is the central component of the basal RNA polymerase II transcription machinery. It is composed of mobile elements that move relative to each other.…	sp|P62487|RPB7_HUMAN	sp|P62487|RPB7_HUMAN DNA-directed RNA polymerase II subunit RPB7 OS=Homo sapiens OX=9606 GN=POLR2G PE=1 SV=1	1	2	2	2	15.7	19.294	143460	46875	3.06048
Q9NS73	MAP3K12-binding inhibitory protein 1	MBIP	FUNCTION: Inhibits the MAP3K12 activity to induce the activation of the JNK/SAPK pathway. Component of the ATAC complex, a complex with histone acetyltransferase activity on histones H3 and H4. {ECO:0000269|PubMed:19103755}.	sp|Q9NS73|MBIP1_HUMAN	sp|Q9NS73|MBIP1_HUMAN MAP3K12-binding inhibitory protein 1 OS=Homo sapiens OX=9606 GN=MBIP PE=1 SV=2	1	1	1	1	4.7	39.281	19729	6454.8	3.05649
P20338	Ras-related protein Rab-4A	RAB4A	FUNCTION: Protein transport. Plays a role in vesicular traffic. Mediates VEGFR2 endosomal trafficking to enhance VEGFR2 signaling. {ECO:0000269|PubMed:29425100}.	sp|P20338|RAB4A_HUMAN	sp|P20338|RAB4A_HUMAN Ras-related protein Rab-4A OS=Homo sapiens OX=9606 GN=RAB4A PE=1 SV=3	1	7	7	6	42.2	24.389	3077400	1010900	3.04422
P38571	Lysosomal acid lipase/cholesteryl ester hydrolase	LIPA	FUNCTION: Catalyzes the deacylation of triacylglyceryl and cholesteryl ester core lipids of endocytosed low density lipoproteins to generate free fatty acids and cholesterol. {ECO:0000269|PubMed:15269241, ECO:0000269|PubMed:1718995, ECO:0000269|PubMed:7204383, ECO:0000269|PubMed:8112342, ECO:0000269|PubMed:9633819}.	sp|P38571|LICH_HUMAN	sp|P38571|LICH_HUMAN Lysosomal acid lipase/cholesteryl ester hydrolase OS=Homo sapiens OX=9606 GN=LIPA PE=1 SV=2	1	3	3	3	13.8	45.418	1513900	498000	3.03996
Q8NEY1	Neuron navigator 1	NAV1	FUNCTION: May be involved in neuronal migration. {ECO:0000250}.	sp|Q8NEY1|NAV1_HUMAN	sp|Q8NEY1|NAV1_HUMAN Neuron navigator 1 OS=Homo sapiens OX=9606 GN=NAV1 PE=1 SV=2	1	4	4	4	4	202.47	472230	155670	3.03353
P62253	Ubiquitin-conjugating enzyme E2 G1	UBE2G1	FUNCTION: Accepts ubiquitin from the E1 complex and catalyzes its covalent attachment to other proteins. In vitro catalyzes 'Lys-48'-, as well as 'Lys-63'-linked polyubiquitination. May be involved in degradation of muscle-specific proteins. Mediates polyubiquitination of CYP3A4. {ECO:0000269|PubMed:19103148, ECO:0000269|PubMed:20061386}.	sp|P62253|UB2G1_HUMAN	sp|P62253|UB2G1_HUMAN Ubiquitin-conjugating enzyme E2 G1 OS=Homo sapiens OX=9606 GN=UBE2G1 PE=1 SV=3	1	2	2	2	17.6	19.509	708980	233930	3.03074
Q5VV52	Zinc finger protein 691	ZNF691	FUNCTION: May be involved in transcriptional regulation.	sp|Q5VV52|ZN691_HUMAN	sp|Q5VV52|ZN691_HUMAN Zinc finger protein 691 OS=Homo sapiens OX=9606 GN=ZNF691 PE=1 SV=2	1	3	3	3	12.4	35.809	171240	56584	3.0263
P29317	Ephrin type-A receptor 2	EPHA2	FUNCTION: Receptor tyrosine kinase which binds promiscuously membrane-bound ephrin-A family ligands residing on adjacent cells, leading to contact-dependent bidirectional signaling into neighboring cells. The signaling pathway downstream of the receptor is referred to as forward signaling while the signaling pathway downstream of the ephrin ligand is referred to as reverse signaling. Activated by…	sp|P29317|EPHA2_HUMAN	sp|P29317|EPHA2_HUMAN Ephrin type-A receptor 2 OS=Homo sapiens OX=9606 GN=EPHA2 PE=1 SV=2	1	13	12	12	20.8	108.27	2255200	748200	3.01417
Q9NSK0	Kinesin light chain 4	KLC4	FUNCTION: Kinesin is a microtubule-associated force-producing protein that may play a role in organelle transport. The light chain may function in coupling of cargo to the heavy chain or in the modulation of its ATPase activity (By similarity). {ECO:0000250}.	sp|Q9NSK0|KLC4_HUMAN	sp|Q9NSK0|KLC4_HUMAN Kinesin light chain 4 OS=Homo sapiens OX=9606 GN=KLC4 PE=1 SV=3	1	15	15	12	39.1	68.639	2583300	863780	2.99069
Q8IX18	Probable ATP-dependent RNA helicase DHX40	DHX40	FUNCTION: Probable ATP-dependent RNA helicase. {ECO:0000250}.	sp|Q8IX18|DHX40_HUMAN	sp|Q8IX18|DHX40_HUMAN Probable ATP-dependent RNA helicase DHX40 OS=Homo sapiens OX=9606 GN=DHX40 PE=1 SV=2	1	8	8	8	14	88.559	1175300	393440	2.98724
Q13033	Striatin-3	STRN3	FUNCTION: Binds calmodulin in a calcium dependent manner. May function as scaffolding or signaling protein.	sp|Q13033|STRN3_HUMAN	sp|Q13033|STRN3_HUMAN Striatin-3 OS=Homo sapiens OX=9606 GN=STRN3 PE=1 SV=3	1	10	9	8	16.8	87.208	1491900	500330	2.98183
P54577	Tyrosine--tRNA ligase, cytoplasmic	YARS1	FUNCTION: Catalyzes the attachment of tyrosine to tRNA(Tyr) in a two-step reaction: tyrosine is first activated by ATP to form Tyr-AMP and then transferred to the acceptor end of tRNA(Tyr). {ECO:0000250}.	sp|P54577|SYYC_HUMAN	sp|P54577|SYYC_HUMAN Tyrosine--tRNA ligase, cytoplasmic OS=Homo sapiens OX=9606 GN=YARS1 PE=1 SV=4	1	21	21	21	42.2	59.143	10422000	3507800	2.97109
Q9BUT1	Dehydrogenase/reductase SDR family member 6	BDH2	FUNCTION: Dehydrogenase that mediates the formation of 2,5-dihydroxybenzoic acid (2,5-DHBA), a siderophore that shares structural similarities with bacterial enterobactin and associates with LCN2, thereby playing a key role in iron assimilation and homeostasis. Plays a role in susceptibility to bacterial infection by providing an assimilable source of iron that is exploited by pathogenic bacteria…	sp|Q9BUT1|DHRS6_HUMAN	sp|Q9BUT1|DHRS6_HUMAN Dehydrogenase/reductase SDR family member 6 OS=Homo sapiens OX=9606 GN=BDH2 PE=1 SV=2	1	3	3	3	18.4	26.724	245930	82913	2.96612
Q8N5K1	CDGSH iron-sulfur domain-containing protein 2	CISD2	FUNCTION: Regulator of autophagy that contributes to antagonize BECN1-mediated cellular autophagy at the endoplasmic reticulum. Participates in the interaction of BCL2 with BECN1 and is required for BCL2-mediated depression of endoplasmic reticulum Ca(2+) stores during autophagy. Contributes to BIK-initiated autophagy, while it is not involved in BIK-dependent activation of caspases. Involved in …	sp|Q8N5K1|CISD2_HUMAN	sp|Q8N5K1|CISD2_HUMAN CDGSH iron-sulfur domain-containing protein 2 OS=Homo sapiens OX=9606 GN=CISD2 PE=1 SV=1	1	2	2	2	18.5	15.278	904040	304970	2.96436
Q5JSZ5	Protein PRRC2B	PRRC2B		sp|Q5JSZ5|PRC2B_HUMAN	sp|Q5JSZ5|PRC2B_HUMAN Protein PRRC2B OS=Homo sapiens OX=9606 GN=PRRC2B PE=1 SV=2	1	17	14	14	12.3	242.96	1339800	452730	2.95938
Q86XA9	HEAT repeat-containing protein 5A	HEATR5A		sp|Q86XA9|HTR5A_HUMAN	sp|Q86XA9|HTR5A_HUMAN HEAT repeat-containing protein 5A OS=Homo sapiens OX=9606 GN=HEATR5A PE=1 SV=2	1	2	2	2	1.3	222	99657	33804	2.94808
Q15022	Polycomb protein SUZ12	SUZ12	FUNCTION: Polycomb group (PcG) protein. Component of the PRC2/EED-EZH2 complex, which methylates 'Lys-9' (H3K9me) and 'Lys-27' (H3K27me) of histone H3, leading to transcriptional repression of the affected target gene. The PRC2/EED-EZH2 complex may also serve as a recruiting platform for DNA methyltransferases, thereby linking two epigenetic repression systems. Genes repressed by the PRC2/EED-EZH…	sp|Q15022|SUZ12_HUMAN	sp|Q15022|SUZ12_HUMAN Polycomb protein SUZ12 OS=Homo sapiens OX=9606 GN=SUZ12 PE=1 SV=3	1	5	5	5	10.7	83.054	80812	27435	2.94558
Q7L775	EPM2A-interacting protein 1	EPM2AIP1		sp|Q7L775|EPMIP_HUMAN	sp|Q7L775|EPMIP_HUMAN EPM2A-interacting protein 1 OS=Homo sapiens OX=9606 GN=EPM2AIP1 PE=1 SV=1	1	8	8	8	18	70.369	753590	255970	2.94406
Q8IXL7	Methionine-R-sulfoxide reductase B3	MSRB3	FUNCTION: Catalyzes the reduction of free and protein-bound methionine sulfoxide to methionine. Isoform 2 is essential for hearing. {ECO:0000269|PubMed:14699060, ECO:0000269|PubMed:21185009}.	sp|Q8IXL7|MSRB3_HUMAN	sp|Q8IXL7|MSRB3_HUMAN Methionine-R-sulfoxide reductase B3 OS=Homo sapiens OX=9606 GN=MSRB3 PE=1 SV=2	1	2	2	2	19.3	20.702	106400	36513	2.91403
Q8WZ42	Titin	TTN	FUNCTION: Key component in the assembly and functioning of vertebrate striated muscles. By providing connections at the level of individual microfilaments, it contributes to the fine balance of forces between the two halves of the sarcomere. The size and extensibility of the cross-links are the main determinants of sarcomere extensibility properties of muscle. In non-muscle cells, seems to play a…	sp|Q8WZ42|TITIN_HUMAN	sp|Q8WZ42|TITIN_HUMAN Titin OS=Homo sapiens OX=9606 GN=TTN PE=1 SV=4	1	3	3	3	0.1	3816	40235	13811	2.91326
Q9BX95	Sphingosine-1-phosphate phosphatase 1	SGPP1	FUNCTION: Specifically dephosphorylates sphingosine 1-phosphate (S1P), dihydro-S1P, and phyto-S1P. Does not act on ceramide 1-phosphate, lysophosphatidic acid or phosphatidic acid (PubMed:16782891). Sphingosine-1-phosphate phosphatase activity is needed for efficient recycling of sphingosine into the sphingolipid synthesis pathway (PubMed:12815058, PubMed:11756451, PubMed:16782891). Regulates the…	sp|Q9BX95|SGPP1_HUMAN	sp|Q9BX95|SGPP1_HUMAN Sphingosine-1-phosphate phosphatase 1 OS=Homo sapiens OX=9606 GN=SGPP1 PE=1 SV=2	1	3	3	3	6.3	49.107	243370	83732	2.90654
Q8NBJ5	Procollagen galactosyltransferase 1	COLGALT1	FUNCTION: Beta-galactosyltransferase that transfers beta-galactose to hydroxylysine residues of type I collagen (PubMed:19075007, PubMed:22216269, PubMed:27402836). By acting on collagen glycosylation, facilitates the formation of collagen triple helix (PubMed:27402836). Also involved in the biosynthesis of collagen type IV (PubMed:30412317). {ECO:0000269|PubMed:19075007, ECO:0000269|PubMed:22216…	sp|Q8NBJ5|GT251_HUMAN	sp|Q8NBJ5|GT251_HUMAN Procollagen galactosyltransferase 1 OS=Homo sapiens OX=9606 GN=COLGALT1 PE=1 SV=1	1	12	12	12	23.8	71.635	2569900	884260	2.90627
Q86W92	Liprin-beta-1	PPFIBP1	FUNCTION: May regulate the disassembly of focal adhesions. Did not bind receptor-like tyrosine phosphatases type 2A. {ECO:0000269|PubMed:9624153}.	sp|Q86W92|LIPB1_HUMAN	sp|Q86W92|LIPB1_HUMAN Liprin-beta-1 OS=Homo sapiens OX=9606 GN=PPFIBP1 PE=1 SV=2	1	6	6	6	7.1	114.02	402860	139000	2.89827
O00566	U3 small nucleolar ribonucleoprotein protein MPP10	MPHOSPH10	FUNCTION: Component of the 60-80S U3 small nucleolar ribonucleoprotein (U3 snoRNP). Required for the early cleavages during pre-18S ribosomal RNA processing.	sp|O00566|MPP10_HUMAN	sp|O00566|MPP10_HUMAN U3 small nucleolar ribonucleoprotein protein MPP10 OS=Homo sapiens OX=9606 GN=MPHOSPH10 PE=1 SV=2	1	1	1	1	2.6	78.863	33364	11514	2.89769
Q9UJ83	2-hydroxyacyl-CoA lyase 1	HACL1	FUNCTION: Peroxisomal 2-OH acyl-CoA lyase involved in the cleavage (C1 removal) reaction in the fatty acid alpha-oxydation in a thiamine pyrophosphate (TPP)-dependent manner (PubMed:28289220, PubMed:21708296, PubMed:10468558). Involved in the degradation of 3-methyl-branched fatty acids like phytanic acid and the shortening of 2-hydroxy long-chain fatty acids (PubMed:28289220, PubMed:21708296, Pu…	sp|Q9UJ83|HACL1_HUMAN	sp|Q9UJ83|HACL1_HUMAN 2-hydroxyacyl-CoA lyase 1 OS=Homo sapiens OX=9606 GN=HACL1 PE=1 SV=2	1	11	11	11	20.1	63.728	1857600	641890	2.89395
P30038	Delta-1-pyrroline-5-carboxylate dehydrogenase, mitochondrial	ALDH4A1	FUNCTION: Irreversible conversion of delta-1-pyrroline-5-carboxylate (P5C), derived either from proline or ornithine, to glutamate. This is a necessary step in the pathway interconnecting the urea and tricarboxylic acid cycles. The preferred substrate is glutamic gamma-semialdehyde, other substrates include succinic, glutaric and adipic semialdehydes. {ECO:0000269|PubMed:22516612}.	sp|P30038|AL4A1_HUMAN	sp|P30038|AL4A1_HUMAN Delta-1-pyrroline-5-carboxylate dehydrogenase, mitochondrial OS=Homo sapiens OX=9606 GN=ALDH4A1 PE=1 SV=3	1	10	10	10	33.6	61.719	3871200	1343100	2.88229
Q9NPI1	Bromodomain-containing protein 7	BRD7	FUNCTION: Acts both as coactivator and as corepressor. May play a role in chromatin remodeling. Activator of the Wnt signaling pathway in a DVL1-dependent manner by negatively regulating the GSK3B phosphotransferase activity. Induces dephosphorylation of GSK3B at 'Tyr-216'. Down-regulates TRIM24-mediated activation of transcriptional activation by AR (By similarity). Transcriptional corepressor t…	sp|Q9NPI1|BRD7_HUMAN	sp|Q9NPI1|BRD7_HUMAN Bromodomain-containing protein 7 OS=Homo sapiens OX=9606 GN=BRD7 PE=1 SV=1	1	10	10	10	23.2	74.138	899900	312370	2.88088
Q15036	Sorting nexin-17	SNX17	FUNCTION: Critical regulator of endosomal recycling of numerous surface proteins, including integrins, signaling receptor and channels (PubMed:15121882, PubMed:15769472). Binds to NPxY sequences in the cytoplasmic tails of target cargos (PubMed:21512128). Associates with retriever and CCC complexes to prevent lysosomal degradation and promote cell surface recycling of numerous cargos such as inte…	sp|Q15036|SNX17_HUMAN	sp|Q15036|SNX17_HUMAN Sorting nexin-17 OS=Homo sapiens OX=9606 GN=SNX17 PE=1 SV=1	1	3	3	3	8.3	52.901	174920	60741	2.87977
Q6W2J9	BCL-6 corepressor	BCOR	FUNCTION: Transcriptional corepressor. May specifically inhibit gene expression when recruited to promoter regions by sequence-specific DNA-binding proteins such as BCL6 and MLLT3. This repression may be mediated at least in part by histone deacetylase activities which can associate with this corepressor. Involved in the repression of TFAP2A; impairs binding of BCL6 and KDM2B to TFAP2A promoter r…	sp|Q6W2J9|BCOR_HUMAN	sp|Q6W2J9|BCOR_HUMAN BCL-6 corepressor OS=Homo sapiens OX=9606 GN=BCOR PE=1 SV=1	1	3	3	3	2.8	192.19	82823	28761	2.8797
Q9UNE7	E3 ubiquitin-protein ligase CHIP	STUB1	FUNCTION: E3 ubiquitin-protein ligase which targets misfolded chaperone substrates towards proteasomal degradation. Collaborates with ATXN3 in the degradation of misfolded chaperone substrates: ATXN3 restricting the length of ubiquitin chain attached to STUB1/CHIP substrates and preventing further chain extension. Ubiquitinates NOS1 in concert with Hsp70 and Hsp40. Modulates the activity of sever…	sp|Q9UNE7|CHIP_HUMAN	sp|Q9UNE7|CHIP_HUMAN E3 ubiquitin-protein ligase CHIP OS=Homo sapiens OX=9606 GN=STUB1 PE=1 SV=2	1	17	17	17	60.4	34.856	14733000	5116500	2.87951
Q9BW61	DET1- and DDB1-associated protein 1	DDA1	FUNCTION: Functions as a component of numerous distinct DCX (DDB1-CUL4-X-box) E3 ubiquitin-protein ligase complexes which mediate the ubiquitination and subsequent proteasomal degradation of target proteins (PubMed:17452440, PubMed:28437394, PubMed:28302793, PubMed:31686031, PubMed:31819272). In the DCX complexes, acts as a scaffolding subunit required to stabilize the complex (PubMed:31686031, P…	sp|Q9BW61|DDA1_HUMAN	sp|Q9BW61|DDA1_HUMAN DET1- and DDB1-associated protein 1 OS=Homo sapiens OX=9606 GN=DDA1 PE=1 SV=1	1	3	3	3	31.4	11.835	218070	75767	2.87817
Q969T7	7-methylguanosine phosphate-specific 5-nucleotidase	NT5C3B	FUNCTION: Specifically hydrolyzes 7-methylguanosine monophosphate (m(7)GMP) to 7-methylguanosine and inorganic phosphate (PubMed:23223233, PubMed:24603684). The specific activity for m(7)GMP may protect cells against undesired salvage of m(7)GMP and its incorporation into nucleic acids (PubMed:23223233). Also has weak activity for CMP (PubMed:23223233, PubMed:24603684). UMP and purine nucleotides…	sp|Q969T7|5NT3B_HUMAN	sp|Q969T7|5NT3B_HUMAN 7-methylguanosine phosphate-specific 5-nucleotidase OS=Homo sapiens OX=9606 GN=NT5C3B PE=1 SV=4	1	5	5	5	22.3	34.389	822970	286260	2.8749
O14647	Chromodomain-helicase-DNA-binding protein 2	CHD2	FUNCTION: DNA-binding helicase that specifically binds to the promoter of target genes, leading to chromatin remodeling, possibly by promoting deposition of histone H3.3. Involved in myogenesis via interaction with MYOD1: binds to myogenic gene regulatory sequences and mediates incorporation of histone H3.3 prior to the onset of myogenic gene expression, promoting their expression (By similarity)…	sp|O14647|CHD2_HUMAN	sp|O14647|CHD2_HUMAN Chromodomain-helicase-DNA-binding protein 2 OS=Homo sapiens OX=9606 GN=CHD2 PE=1 SV=2	1	8	6	6	5.2	211.34	271940	94761	2.86975
Q12857	Nuclear factor 1 A-type	NFIA	FUNCTION: Recognizes and binds the palindromic sequence 5'-TTGGCNNNNNGCCAA-3' present in viral and cellular promoters and in the origin of replication of adenovirus type 2. These proteins are individually capable of activating transcription and replication.	sp|Q12857|NFIA_HUMAN	sp|Q12857|NFIA_HUMAN Nuclear factor 1 A-type OS=Homo sapiens OX=9606 GN=NFIA PE=1 SV=2	1	2	2	1	4.1	55.944	82380	28843	2.85615
Q8TF74	WAS/WASL-interacting protein family member 2	WIPF2	FUNCTION: Plays an active role in the formation of cell surface protrusions downstream of activated PDGFB receptors. Plays an important role in actin-microspike formation through cooperation with WASL. May cooperate with WASP and WASL to induce mobilization and reorganization of the actin filament system. {ECO:0000269|PubMed:11829459, ECO:0000269|PubMed:12213210}.	sp|Q8TF74|WIPF2_HUMAN	sp|Q8TF74|WIPF2_HUMAN WAS/WASL-interacting protein family member 2 OS=Homo sapiens OX=9606 GN=WIPF2 PE=1 SV=1	1	2	2	2	7.3	46.288	252980	88621	2.85463
P15289	Arylsulfatase A	ARSA	FUNCTION: Hydrolyzes cerebroside sulfate. {ECO:0000269|PubMed:10751093, ECO:0000269|PubMed:24294900}.	sp|P15289|ARSA_HUMAN	sp|P15289|ARSA_HUMAN Arylsulfatase A OS=Homo sapiens OX=9606 GN=ARSA PE=1 SV=3	1	5	5	5	19.5	53.588	2002300	702410	2.85061
Q9P2R3	Rabankyrin-5	ANKFY1	FUNCTION: Proposed effector of Rab5. Binds to phosphatidylinositol 3-phosphate (PI(3)P). Involved in homotypic early endosome fusion and to a lesser extent in heterotypic fusion of chlathrin-coated vesicles with early endosomes. Involved in macropinocytosis; the function is dependent on Rab5-GTP. Required for correct endosomal localization. Involved in the internalization and trafficking of activ…	sp|Q9P2R3|ANFY1_HUMAN	sp|Q9P2R3|ANFY1_HUMAN Rabankyrin-5 OS=Homo sapiens OX=9606 GN=ANKFY1 PE=1 SV=2	1	18	18	18	21.1	128.4	3708600	1305600	2.84053
Q12756	Kinesin-like protein KIF1A	KIF1A	FUNCTION: Motor for anterograde axonal transport of synaptic vesicle precursors. Also required for neuronal dense core vesicles (DCVs) transport to the dendritic spines and axons. The interaction calcium-dependent with CALM1 increases vesicle motility and interaction with the scaffolding proteins PPFIA2 and TANC2 recruits DCVs to synaptic sites. {ECO:0000250|UniProtKB:F1M4A4}.	sp|Q12756|KIF1A_HUMAN	sp|Q12756|KIF1A_HUMAN Kinesin-like protein KIF1A OS=Homo sapiens OX=9606 GN=KIF1A PE=1 SV=2	1	18	18	15	15.6	191.06	1880300	662340	2.83887
Q9GZY4	Cytochrome c oxidase assembly factor 1 homolog	COA1	FUNCTION: Component of the MITRAC (mitochondrial translation regulation assembly intermediate of cytochrome c oxidase complex) complex, that regulates cytochrome c oxidase assembly. MITRAC complexes regulate both translation of mitochondrial encoded components and assembly of nuclear-encoded components imported in mitochondrion. Required for assembly of mitochondrial respiratory chain complex I a…	sp|Q9GZY4|COA1_HUMAN	sp|Q9GZY4|COA1_HUMAN Cytochrome c oxidase assembly factor 1 homolog OS=Homo sapiens OX=9606 GN=COA1 PE=1 SV=1	1	5	5	5	49.3	16.694	890320	313710	2.83804
O75817	Ribonuclease P protein subunit p20	POP7	FUNCTION: Component of ribonuclease P, a ribonucleoprotein complex that generates mature tRNA molecules by cleaving their 5'-ends (PubMed:9630247, PubMed:30454648). Also a component of the MRP ribonuclease complex, which cleaves pre-rRNA sequences (PubMed:28115465). {ECO:0000269|PubMed:28115465, ECO:0000269|PubMed:30454648, ECO:0000269|PubMed:9630247}.	sp|O75817|POP7_HUMAN	sp|O75817|POP7_HUMAN Ribonuclease P protein subunit p20 OS=Homo sapiens OX=9606 GN=POP7 PE=1 SV=2	1	1	1	1	7.1	15.651	277470	97869	2.83512
Q9HCG8	Pre-mRNA-splicing factor CWC22 homolog	CWC22	FUNCTION: Required for pre-mRNA splicing as component of the spliceosome (PubMed:12226669, PubMed:11991638, PubMed:22961380, PubMed:28502770, PubMed:28076346, PubMed:29360106, PubMed:29301961). Promotes exon-junction complex (EJC) assembly (PubMed:22959432, PubMed:22961380). Hinders EIF4A3 from non-specifically binding RNA and escorts it to the splicing machinery to promote EJC assembly on mature…	sp|Q9HCG8|CWC22_HUMAN	sp|Q9HCG8|CWC22_HUMAN Pre-mRNA-splicing factor CWC22 homolog OS=Homo sapiens OX=9606 GN=CWC22 PE=1 SV=3	1	5	5	5	7.6	105.47	286920	101350	2.83098
Q8TED1	Probable glutathione peroxidase 8	GPX8		sp|Q8TED1|GPX8_HUMAN	sp|Q8TED1|GPX8_HUMAN Probable glutathione peroxidase 8 OS=Homo sapiens OX=9606 GN=GPX8 PE=1 SV=2	1	5	5	5	30.1	23.881	415070	146700	2.82938
Q9H4M9	EH domain-containing protein 1	EHD1	FUNCTION: ATP- and membrane-binding protein that controls membrane reorganization/tubulation upon ATP hydrolysis. In vitro causes vesiculation of endocytic membranes (PubMed:24019528). Acts in early endocytic membrane fusion and membrane trafficking of recycling endosomes (PubMed:15020713, PubMed:17233914, PubMed:20801876). Recruited to endosomal membranes upon nerve growth factor stimulation, in…	sp|Q9H4M9|EHD1_HUMAN	sp|Q9H4M9|EHD1_HUMAN EH domain-containing protein 1 OS=Homo sapiens OX=9606 GN=EHD1 PE=1 SV=2	1	13	13	9	33.3	60.626	1365700	483120	2.82683
Q14C86	GTPase-activating protein and VPS9 domain-containing protein 1	GAPVD1	FUNCTION: Acts both as a GTPase-activating protein (GAP) and a guanine nucleotide exchange factor (GEF), and participates in various processes such as endocytosis, insulin receptor internalization or LC2A4/GLUT4 trafficking. Acts as a GEF for the Ras-related protein RAB31 by exchanging bound GDP for free GTP, leading to regulate LC2A4/GLUT4 trafficking. In the absence of insulin, it maintains RAB…	sp|Q14C86|GAPD1_HUMAN	sp|Q14C86|GAPD1_HUMAN GTPase-activating protein and VPS9 domain-containing protein 1 OS=Homo sapiens OX=9606 GN=GAPVD1 PE=1 SV=2	1	20	20	20	20.2	164.98	3226000	1141800	2.82536
Q9H1Y0	Autophagy protein 5	ATG5	FUNCTION: Involved in autophagic vesicle formation. Conjugation with ATG12, through a ubiquitin-like conjugating system involving ATG7 as an E1-like activating enzyme and ATG10 as an E2-like conjugating enzyme, is essential for its function. The ATG12-ATG5 conjugate acts as an E3-like enzyme which is required for lipidation of ATG8 family proteins and their association to the vesicle membranes. I…	sp|Q9H1Y0|ATG5_HUMAN	sp|Q9H1Y0|ATG5_HUMAN Autophagy protein 5 OS=Homo sapiens OX=9606 GN=ATG5 PE=1 SV=2	1	3	3	3	13.5	32.447	423280	149940	2.823
P31151	Protein S100-A7	S100A7		sp|P31151|S10A7_HUMAN;sp|Q86SG5|S1A7A_HUMAN	sp|P31151|S10A7_HUMAN Protein S100-A7 OS=Homo sapiens OX=9606 GN=S100A7 PE=1 SV=4;sp|Q86SG5|S1A7A_HUMAN Protein S100-A7A OS=Homo sapiens OX=9606 GN=S100A7A PE=1 SV=3	2	4	4	4	46.5	11.471	249090	88287	2.82137
O75886	Signal transducing adapter molecule 2	STAM2	FUNCTION: Involved in intracellular signal transduction mediated by cytokines and growth factors. Upon IL-2 and GM-CSL stimulation, it plays a role in signaling leading to DNA synthesis and MYC induction. May also play a role in T-cell development. Involved in down-regulation of receptor tyrosine kinase via multivesicular body (MVBs) when complexed with HGS (ESCRT-0 complex). The ESCRT-0 complex …	sp|O75886|STAM2_HUMAN	sp|O75886|STAM2_HUMAN Signal transducing adapter molecule 2 OS=Homo sapiens OX=9606 GN=STAM2 PE=1 SV=1	1	5	3	3	11.2	58.164	612260	217800	2.81111
P17302	Gap junction alpha-1 protein	GJA1	FUNCTION: Gap junction protein that acts as a regulator of bladder capacity. A gap junction consists of a cluster of closely packed pairs of transmembrane channels, the connexons, through which materials of low MW diffuse from one cell to a neighboring cell. May play a critical role in the physiology of hearing by participating in the recycling of potassium to the cochlear endolymph. Negative reg…	sp|P17302|CXA1_HUMAN	sp|P17302|CXA1_HUMAN Gap junction alpha-1 protein OS=Homo sapiens OX=9606 GN=GJA1 PE=1 SV=2	1	5	5	5	20.2	43.008	100540	35795	2.80877
Q9HAR2	Adhesion G protein-coupled receptor L3	ADGRL3	FUNCTION: Plays a role in cell-cell adhesion and neuron guidance via its interactions with FLRT2 and FLRT3 that are expressed at the surface of adjacent cells (PubMed:26235030). Plays a role in the development of glutamatergic synapses in the cortex. Important in determining the connectivity rates between the principal neurons in the cortex. {ECO:0000250|UniProtKB:Q80TS3, ECO:0000305|PubMed:26235…	sp|Q9HAR2|AGRL3_HUMAN	sp|Q9HAR2|AGRL3_HUMAN Adhesion G protein-coupled receptor L3 OS=Homo sapiens OX=9606 GN=ADGRL3 PE=1 SV=2	1	1	1	1	1.2	161.81	13982	4995	2.7992
Q9NQS3	Nectin-3	NECTIN3	FUNCTION: Plays a role in cell-cell adhesion through heterophilic trans-interactions with nectin-like proteins or nectins, such as trans-interaction with NECTIN2 at Sertoli-spermatid junctions. Trans-interaction with PVR induces activation of CDC42 and RAC small G proteins through common signaling molecules such as SRC and RAP1. Also involved in the formation of cell-cell junctions, including adh…	sp|Q9NQS3|NECT3_HUMAN	sp|Q9NQS3|NECT3_HUMAN Nectin-3 OS=Homo sapiens OX=9606 GN=NECTIN3 PE=1 SV=1	1	1	1	1	4.2	61.002	63975	22868	2.79758
O95391	Pre-mRNA-splicing factor SLU7	SLU7	FUNCTION: Required for pre-mRNA splicing as component of the spliceosome (PubMed:10197984, PubMed:28502770, PubMed:30705154). Participates in the second catalytic step of pre-mRNA splicing, when the free hydroxyl group of exon I attacks the 3'-splice site to generate spliced mRNA and the excised lariat intron. Required for holding exon 1 properly in the spliceosome and for correct AG identificati…	sp|O95391|SLU7_HUMAN	sp|O95391|SLU7_HUMAN Pre-mRNA-splicing factor SLU7 OS=Homo sapiens OX=9606 GN=SLU7 PE=1 SV=2	1	4	4	4	11.4	68.386	86124	30898	2.78736
A1A5C7	Solute carrier family 22 member 23	SLC22A23		sp|A1A5C7|S22AN_HUMAN	sp|A1A5C7|S22AN_HUMAN Solute carrier family 22 member 23 OS=Homo sapiens OX=9606 GN=SLC22A23 PE=1 SV=2	1	2	2	2	4.4	73.747	77942	27963	2.78733
O75027	Iron-sulfur clusters transporter ABCB7, mitochondrial	ABCB7	FUNCTION: Could be involved in the transport of heme from the mitochondria to the cytosol. Plays a central role in the maturation of cytosolic iron-sulfur (Fe/S) cluster-containing proteins. {ECO:0000269|PubMed:10196363}.	sp|O75027|ABCB7_HUMAN	sp|O75027|ABCB7_HUMAN Iron-sulfur clusters transporter ABCB7, mitochondrial OS=Homo sapiens OX=9606 GN=ABCB7 PE=1 SV=2	1	11	11	11	17	82.64	2482500	890810	2.78679
Q14671	Pumilio homolog 1	PUM1	FUNCTION: Sequence-specific RNA-binding protein that acts as a post-transcriptional repressor by binding the 3'-UTR of mRNA targets. Binds to an RNA consensus sequence, the Pumilio Response Element (PRE), 5'-UGUANAUA-3', that is related to the Nanos Response Element (NRE) (PubMed:21572425, PubMed:18328718, PubMed:21653694, PubMed:21397187). Mediates post-transcriptional repression of transcripts …	sp|Q14671|PUM1_HUMAN	sp|Q14671|PUM1_HUMAN Pumilio homolog 1 OS=Homo sapiens OX=9606 GN=PUM1 PE=1 SV=3	1	14	14	13	17.9	126.47	1648400	591570	2.78648
Q2TAA2	Isoamyl acetate-hydrolyzing esterase 1 homolog	IAH1	FUNCTION: Probable lipase. {ECO:0000250}.	sp|Q2TAA2|IAH1_HUMAN	sp|Q2TAA2|IAH1_HUMAN Isoamyl acetate-hydrolyzing esterase 1 homolog OS=Homo sapiens OX=9606 GN=IAH1 PE=1 SV=1	1	1	1	1	5.2	27.598	194150	69739	2.78395
Q99653	Calcineurin B homologous protein 1	CHP1	FUNCTION: Calcium-binding protein involved in different processes such as regulation of vesicular trafficking, plasma membrane Na(+)/H(+) exchanger and gene transcription. Involved in the constitutive exocytic membrane traffic. Mediates the association between microtubules and membrane-bound organelles of the endoplasmic reticulum and Golgi apparatus and is also required for the targeting and fus…	sp|Q99653|CHP1_HUMAN	sp|Q99653|CHP1_HUMAN Calcineurin B homologous protein 1 OS=Homo sapiens OX=9606 GN=CHP1 PE=1 SV=3	1	8	8	8	56.4	22.456	1884000	677620	2.78032
Q68DK2	Zinc finger FYVE domain-containing protein 26	ZFYVE26	FUNCTION: Phosphatidylinositol 3-phosphate-binding protein required for the abcission step in cytokinesis: recruited to the midbody during cytokinesis and acts as a regulator of abcission. May also be required for efficient homologous recombination DNA double-strand break repair. {ECO:0000269|PubMed:20208530}.	sp|Q68DK2|ZFY26_HUMAN	sp|Q68DK2|ZFY26_HUMAN Zinc finger FYVE domain-containing protein 26 OS=Homo sapiens OX=9606 GN=ZFYVE26 PE=1 SV=3	1	4	4	4	2.5	284.57	912740	328390	2.77944
O14578	Citron Rho-interacting kinase	CIT	FUNCTION: Plays a role in cytokinesis. Required for KIF14 localization to the central spindle and midbody. Putative RHO/RAC effector that binds to the GTP-bound forms of RHO and RAC1. It probably binds p21 with a tighter specificity in vivo. Displays serine/threonine protein kinase activity. Plays an important role in the regulation of cytokinesis and the development of the central nervous system…	sp|O14578|CTRO_HUMAN	sp|O14578|CTRO_HUMAN Citron Rho-interacting kinase OS=Homo sapiens OX=9606 GN=CIT PE=1 SV=2	1	7	7	7	6	231.43	964250	346950	2.77922
Q9NPF4	tRNA N6-adenosine threonylcarbamoyltransferase	OSGEP	FUNCTION: Component of the EKC/KEOPS complex that is required for the formation of a threonylcarbamoyl group on adenosine at position 37 (t(6)A37) in tRNAs that read codons beginning with adenine. The complex is probably involved in the transfer of the threonylcarbamoyl moiety of threonylcarbamoyl-AMP (TC-AMP) to the N6 group of A37. OSGEP likely plays a direct catalytic role in this reaction, bu…	sp|Q9NPF4|OSGEP_HUMAN	sp|Q9NPF4|OSGEP_HUMAN tRNA N6-adenosine threonylcarbamoyltransferase OS=Homo sapiens OX=9606 GN=OSGEP PE=1 SV=1	1	8	8	8	40.3	36.426	2419900	871680	2.77613
Q15067	Peroxisomal acyl-coenzyme A oxidase 1	ACOX1	FUNCTION: Catalyzes the desaturation of acyl-CoAs to 2-trans-enoyl-CoAs. {ECO:0000269|PubMed:15060085, ECO:0000269|PubMed:17458872, ECO:0000269|PubMed:17603022}.; FUNCTION: [Isoform 1]: Shows highest activity against medium-chain fatty acyl-CoAs and activity decreases with increasing chain length. {ECO:0000269|PubMed:17603022}.; FUNCTION: [Isoform 2]: Is active against a much broader range of sub…	sp|Q15067|ACOX1_HUMAN	sp|Q15067|ACOX1_HUMAN Peroxisomal acyl-coenzyme A oxidase 1 OS=Homo sapiens OX=9606 GN=ACOX1 PE=1 SV=3	1	17	17	17	44.4	74.423	3598500	1297600	2.7732
Q7Z6M1	Rab9 effector protein with kelch motifs	RABEPK	FUNCTION: Rab9 effector required for endosome to trans-Golgi network (TGN) transport. {ECO:0000269|PubMed:9230071}.	sp|Q7Z6M1|RABEK_HUMAN	sp|Q7Z6M1|RABEK_HUMAN Rab9 effector protein with kelch motifs OS=Homo sapiens OX=9606 GN=RABEPK PE=1 SV=1	1	2	2	2	9.4	40.564	38829	14041	2.7654
Q16539	Mitogen-activated protein kinase 14	MAPK14	FUNCTION: Serine/threonine kinase which acts as an essential component of the MAP kinase signal transduction pathway. MAPK14 is one of the four p38 MAPKs which play an important role in the cascades of cellular responses evoked by extracellular stimuli such as proinflammatory cytokines or physical stress leading to direct activation of transcription factors. Accordingly, p38 MAPKs phosphorylate a…	sp|Q16539|MK14_HUMAN	sp|Q16539|MK14_HUMAN Mitogen-activated protein kinase 14 OS=Homo sapiens OX=9606 GN=MAPK14 PE=1 SV=3	1	2	2	2	8.6	41.293	287530	104080	2.76259
P55010	Eukaryotic translation initiation factor 5	EIF5	FUNCTION: Catalyzes the hydrolysis of GTP bound to the 40S ribosomal initiation complex (40S.mRNA.Met-tRNA[F].eIF-2.GTP) with the subsequent joining of a 60S ribosomal subunit resulting in the release of eIF-2 and the guanine nucleotide. The subsequent joining of a 60S ribosomal subunit results in the formation of a functional 80S initiation complex (80S.mRNA.Met-tRNA[F]).	sp|P55010|IF5_HUMAN	sp|P55010|IF5_HUMAN Eukaryotic translation initiation factor 5 OS=Homo sapiens OX=9606 GN=EIF5 PE=1 SV=2	1	9	9	9	21.3	49.222	2129000	770690	2.76246
Q9UPU5	Ubiquitin carboxyl-terminal hydrolase 24	USP24	FUNCTION: Ubiquitin-specific protease that regulates cell survival in various contexts through modulating the protein stability of some of its substrates including DDB2, MCL1 or TP53. Plays a positive role on ferritinophagy where ferritin is degraded in lysosomes and releases free iron. {ECO:0000269|PubMed:23159851, ECO:0000269|PubMed:29695420}.	sp|Q9UPU5|UBP24_HUMAN	sp|Q9UPU5|UBP24_HUMAN Ubiquitin carboxyl-terminal hydrolase 24 OS=Homo sapiens OX=9606 GN=USP24 PE=1 SV=3	1	16	16	16	9.3	294.36	1284100	465910	2.75611
P15848	Arylsulfatase B	ARSB	FUNCTION: Removes sulfate groups from chondroitin-4-sulfate (C4S) and regulates its degradation (PubMed:19306108). Involved in the regulation of cell adhesion, cell migration and invasion in colonic epithelium (PubMed:19306108). In the central nervous system, is a regulator of neurite outgrowth and neuronal plasticity, acting through the control of sulfate glycosaminoglycans and neurocan levels (…	sp|P15848|ARSB_HUMAN	sp|P15848|ARSB_HUMAN Arylsulfatase B OS=Homo sapiens OX=9606 GN=ARSB PE=1 SV=1	1	6	6	6	16.3	59.687	1065400	386970	2.75319
Q658P3	Metalloreductase STEAP3	STEAP3	FUNCTION: Endosomal ferrireductase required for efficient transferrin-dependent iron uptake in erythroid cells. Participates in erythroid iron homeostasis by reducing Fe(3+) to Fe(2+). Can also reduce of Cu(2+) to Cu(1+), suggesting that it participates in copper homeostasis. Uses NADP(+) as acceptor. May play a role downstream of p53/TP53 to interface apoptosis and cell cycle progression. Indire…	sp|Q658P3|STEA3_HUMAN	sp|Q658P3|STEA3_HUMAN Metalloreductase STEAP3 OS=Homo sapiens OX=9606 GN=STEAP3 PE=1 SV=2	1	3	3	3	9	54.6	412260	149770	2.75262
O75663	TIP41-like protein	TIPRL	FUNCTION: May be a allosteric regulator of serine/threonine-protein phosphatase 2A (PP2A). Isoform 1 inhibits catalytic activity of the PP2A(D) core complex in vitro. The PP2A(C):TIPRL complex does not show phosphatase activity. Acts as negative regulator of serine/threonine-protein phosphatase 4 probably by inhibiting the formation of the active PPP4C:PPP4R2 complex; the function is proposed to …	sp|O75663|TIPRL_HUMAN	sp|O75663|TIPRL_HUMAN TIP41-like protein OS=Homo sapiens OX=9606 GN=TIPRL PE=1 SV=2	1	7	7	7	30.1	31.444	2850700	1038700	2.74449
P29372	DNA-3-methyladenine glycosylase	MPG	FUNCTION: Hydrolysis of the deoxyribose N-glycosidic bond to excise 3-methyladenine, and 7-methylguanine from the damaged DNA polymer formed by alkylation lesions.	sp|P29372|3MG_HUMAN	sp|P29372|3MG_HUMAN DNA-3-methyladenine glycosylase OS=Homo sapiens OX=9606 GN=MPG PE=1 SV=3	1	2	2	2	13.4	32.868	106860	38989	2.74077
Q99627	COP9 signalosome complex subunit 8	COPS8	FUNCTION: Component of the COP9 signalosome complex (CSN), a complex involved in various cellular and developmental processes. The CSN complex is an essential regulator of the ubiquitin (Ubl) conjugation pathway by mediating the deneddylation of the cullin subunits of SCF-type E3 ligase complexes, leading to decrease the Ubl ligase activity of SCF-type complexes such as SCF, CSA or DDB2. The comp…	sp|Q99627|CSN8_HUMAN	sp|Q99627|CSN8_HUMAN COP9 signalosome complex subunit 8 OS=Homo sapiens OX=9606 GN=COPS8 PE=1 SV=1	1	4	4	4	30.1	23.225	2609900	953350	2.73761
O60293	Zinc finger C3H1 domain-containing protein	ZFC3H1	FUNCTION: Subunit of the trimeric poly(A) tail exosome targeting (PAXT) complex, a complex that directs a subset of long and polyadenylated poly(A) RNAs for exosomal degradation. The RNA exosome is fundamental for the degradation of RNA in eukaryotic nuclei. Substrate targeting is facilitated by its cofactor MTREX, which links to RNA-binding protein adapters. {ECO:0000269|PubMed:27871484}.	sp|O60293|ZC3H1_HUMAN	sp|O60293|ZC3H1_HUMAN Zinc finger C3H1 domain-containing protein OS=Homo sapiens OX=9606 GN=ZFC3H1 PE=1 SV=3	1	4	4	4	3.1	226.35	120970	44209	2.73632
P11166	Solute carrier family 2, facilitated glucose transporter member 1	SLC2A1	FUNCTION: Facilitative glucose transporter, which is responsible for constitutive or basal glucose uptake (PubMed:18245775, PubMed:19449892, PubMed:25982116, PubMed:27078104, PubMed:10227690). Has a very broad substrate specificity; can transport a wide range of aldoses including both pentoses and hexoses (PubMed:18245775, PubMed:19449892). Most important energy carrier of the brain: present at t…	sp|P11166|GTR1_HUMAN	sp|P11166|GTR1_HUMAN Solute carrier family 2, facilitated glucose transporter member 1 OS=Homo sapiens OX=9606 GN=SLC2A1 PE=1 SV=2	1	4	4	4	7.3	54.083	719230	263010	2.73461
P46199	Translation initiation factor IF-2, mitochondrial	MTIF2	FUNCTION: One of the essential components for the initiation of protein synthesis. Protects formylmethionyl-tRNA from spontaneous hydrolysis and promotes its binding to the 30S ribosomal subunits. Also involved in the hydrolysis of GTP during the formation of the 70S ribosomal complex.	sp|P46199|IF2M_HUMAN	sp|P46199|IF2M_HUMAN Translation initiation factor IF-2, mitochondrial OS=Homo sapiens OX=9606 GN=MTIF2 PE=1 SV=2	1	10	10	10	20.4	81.316	2271300	835130	2.7197
Q9NVR2	Integrator complex subunit 10	INTS10	FUNCTION: Component of the Integrator (INT) complex, a complex involved in the small nuclear RNAs (snRNA) U1 and U2 transcription and in their 3'-box-dependent processing. The Integrator complex is associated with the C-terminal domain (CTD) of RNA polymerase II largest subunit (POLR2A) and is recruited to the U1 and U2 snRNAs genes (Probable). May be not involved in the recruitment of cytoplasmi…	sp|Q9NVR2|INT10_HUMAN	sp|Q9NVR2|INT10_HUMAN Integrator complex subunit 10 OS=Homo sapiens OX=9606 GN=INTS10 PE=1 SV=2	1	5	5	5	8.5	82.235	439760	162570	2.70505
Q12830	Nucleosome-remodeling factor subunit BPTF	BPTF	FUNCTION: Histone-binding component of NURF (nucleosome-remodeling factor), a complex which catalyzes ATP-dependent nucleosome sliding and facilitates transcription of chromatin. Specifically recognizes H3 tails trimethylated on 'Lys-4' (H3K4me3), which mark transcription start sites of virtually all active genes. May also regulate transcription through direct binding to DNA or transcription fact…	sp|Q12830|BPTF_HUMAN	sp|Q12830|BPTF_HUMAN Nucleosome-remodeling factor subunit BPTF OS=Homo sapiens OX=9606 GN=BPTF PE=1 SV=3	1	17	17	17	7.8	338.26	943480	348890	2.70423
Q09019	Dystrophia myotonica WD repeat-containing protein	DMWD		sp|Q09019|DMWD_HUMAN	sp|Q09019|DMWD_HUMAN Dystrophia myotonica WD repeat-containing protein OS=Homo sapiens OX=9606 GN=DMWD PE=1 SV=3	1	2	2	2	3.7	70.437	67460	24988	2.6997
Q01433	AMP deaminase 2	AMPD2	FUNCTION: AMP deaminase plays a critical role in energy metabolism. Catalyzes the deamination of AMP to IMP and plays an important role in the purine nucleotide cycle. {ECO:0000269|PubMed:23911318}.	sp|Q01433|AMPD2_HUMAN	sp|Q01433|AMPD2_HUMAN AMP deaminase 2 OS=Homo sapiens OX=9606 GN=AMPD2 PE=1 SV=2	1	9	9	9	13.4	100.69	751800	278630	2.6982
Q8IY45	Protein AMN1 homolog	AMN1		sp|Q8IY45|AMN1_HUMAN	sp|Q8IY45|AMN1_HUMAN Protein AMN1 homolog OS=Homo sapiens OX=9606 GN=AMN1 PE=2 SV=4	1	1	1	1	5.8	28.408	22715	8419.5	2.6979
P01040	Cystatin-A	CSTA	FUNCTION: This is an intracellular thiol proteinase inhibitor. Has an important role in desmosome-mediated cell-cell adhesion in the lower levels of the epidermis. {ECO:0000269|PubMed:21944047}.	sp|P01040|CYTA_HUMAN	sp|P01040|CYTA_HUMAN Cystatin-A OS=Homo sapiens OX=9606 GN=CSTA PE=1 SV=1	1	4	4	4	52	11.006	62157	23229	2.67584
O94886	CSC1-like protein 1	TMEM63A	FUNCTION: Acts as an osmosensitive calcium-permeable cation channel (PubMed:30382938, PubMed:31587869). Mechanosensitive ion channel that converts mechanical stimuli into a flow of ion (PubMed:30382938, PubMed:31587869). {ECO:0000250|UniProtKB:Q91YT8, ECO:0000269|PubMed:30382938, ECO:0000269|PubMed:31587869}.	sp|O94886|CSCL1_HUMAN	sp|O94886|CSCL1_HUMAN CSC1-like protein 1 OS=Homo sapiens OX=9606 GN=TMEM63A PE=1 SV=3	1	3	3	3	3.6	92.125	730490	276010	2.64661
Q13523	Serine/threonine-protein kinase PRP4 homolog	PRPF4B	FUNCTION: Has a role in pre-mRNA splicing. Phosphorylates SF2/ASF.	sp|Q13523|PRP4B_HUMAN	sp|Q13523|PRP4B_HUMAN Serine/threonine-protein kinase PRP4 homolog OS=Homo sapiens OX=9606 GN=PRPF4B PE=1 SV=3	1	8	8	8	12.1	116.99	1341900	508470	2.63909
O95881	Thioredoxin domain-containing protein 12	TXNDC12	FUNCTION: Possesses significant protein thiol-disulfide oxidase activity. {ECO:0000269|PubMed:12761212}.	sp|O95881|TXD12_HUMAN	sp|O95881|TXD12_HUMAN Thioredoxin domain-containing protein 12 OS=Homo sapiens OX=9606 GN=TXNDC12 PE=1 SV=1	1	4	4	4	30.8	19.206	8490100	3218900	2.63758
Q5TAQ9	DDB1- and CUL4-associated factor 8	DCAF8	FUNCTION: May function as a substrate receptor for CUL4-DDB1 E3 ubiquitin-protein ligase complex. {ECO:0000269|PubMed:16949367, ECO:0000269|PubMed:16964240}.	sp|Q5TAQ9|DCAF8_HUMAN	sp|Q5TAQ9|DCAF8_HUMAN DDB1- and CUL4-associated factor 8 OS=Homo sapiens OX=9606 GN=DCAF8 PE=1 SV=1	1	7	7	7	17.1	66.851	351830	133430	2.63681
Q8N392	Rho GTPase-activating protein 18	ARHGAP18	FUNCTION: Rho GTPase activating protein that suppresses F-actin polymerization by inhibiting Rho. Rho GTPase activating proteins act by converting Rho-type GTPases to an inactive GDP-bound state (PubMed:21865595). Plays a key role in tissue tension and 3D tissue shape by regulating cortical actomyosin network formation. Acts downstream of YAP1 and inhibits actin polymerization, which in turn redu…	sp|Q8N392|RHG18_HUMAN	sp|Q8N392|RHG18_HUMAN Rho GTPase-activating protein 18 OS=Homo sapiens OX=9606 GN=ARHGAP18 PE=1 SV=3	1	3	3	3	6.2	74.976	124610	47338	2.63235
O60566	Mitotic checkpoint serine/threonine-protein kinase BUB1 beta	BUB1B	FUNCTION: Essential component of the mitotic checkpoint. Required for normal mitosis progression. The mitotic checkpoint delays anaphase until all chromosomes are properly attached to the mitotic spindle. One of its checkpoint functions is to inhibit the activity of the anaphase-promoting complex/cyclosome (APC/C) by blocking the binding of CDC20 to APC/C, independently of its kinase activity. Th…	sp|O60566|BUB1B_HUMAN	sp|O60566|BUB1B_HUMAN Mitotic checkpoint serine/threonine-protein kinase BUB1 beta OS=Homo sapiens OX=9606 GN=BUB1B PE=1 SV=3	1	7	7	7	10	119.54	537530	204400	2.62979
Q00169	Phosphatidylinositol transfer protein alpha isoform	PITPNA	FUNCTION: Catalyzes the transfer of PtdIns and phosphatidylcholine between membranes.	sp|Q00169|PIPNA_HUMAN	sp|Q00169|PIPNA_HUMAN Phosphatidylinositol transfer protein alpha isoform OS=Homo sapiens OX=9606 GN=PITPNA PE=1 SV=2	1	8	6	6	31.1	31.806	1922400	732820	2.62329
Q9BSQ5	Cerebral cavernous malformations 2 protein	CCM2	FUNCTION: Component of the CCM signaling pathway which is a crucial regulator of heart and vessel formation and integrity. May act through the stabilization of endothelial cell junctions (By similarity). May function as a scaffold protein for MAP2K3-MAP3K3 signaling. Seems to play a major role in the modulation of MAP3K3-dependent p38 activation induced by hyperosmotic shock (By similarity). {ECO…	sp|Q9BSQ5|CCM2_HUMAN	sp|Q9BSQ5|CCM2_HUMAN Cerebral cavernous malformations 2 protein OS=Homo sapiens OX=9606 GN=CCM2 PE=1 SV=1	1	4	4	4	11.3	48.836	134550	51419	2.61674
Q9ULU4	Protein kinase C-binding protein 1	ZMYND8	FUNCTION: May act as a transcriptional corepressor for KDM5D. Required for KDM5D-mediated down-regulation of diverse metastasis-associated genes; the function seems to involve the recognition of the dual histone signature H3K4me1-H3K14ac. Suppresses prostate cancer cell invasion. {ECO:0000269|PubMed:27477906}.	sp|Q9ULU4|PKCB1_HUMAN	sp|Q9ULU4|PKCB1_HUMAN Protein kinase C-binding protein 1 OS=Homo sapiens OX=9606 GN=ZMYND8 PE=1 SV=2	1	10	10	10	13.5	131.69	706170	270050	2.61496
P25054	Adenomatous polyposis coli protein	APC	FUNCTION: Tumor suppressor. Promotes rapid degradation of CTNNB1 and participates in Wnt signaling as a negative regulator. APC activity is correlated with its phosphorylation state. Activates the GEF activity of SPATA13 and ARHGEF4. Plays a role in hepatocyte growth factor (HGF)-induced cell migration. Required for MMP9 up-regulation via the JNK signaling pathway in colorectal tumor cells. Acts …	sp|P25054|APC_HUMAN	sp|P25054|APC_HUMAN Adenomatous polyposis coli protein OS=Homo sapiens OX=9606 GN=APC PE=1 SV=2	1	2	2	2	1.1	311.64	28295	10831	2.61241
Q9NV70	Exocyst complex component 1	EXOC1	FUNCTION: Component of the exocyst complex involved in the docking of exocytic vesicles with fusion sites on the plasma membrane.; FUNCTION: (Microbial infection) Has an antiviral effect against flaviviruses by affecting viral RNA transcription and translation through the sequestration of elongation factor 1-alpha (EEF1A1). This results in decreased viral RNA synthesis and decreased viral protein…	sp|Q9NV70|EXOC1_HUMAN	sp|Q9NV70|EXOC1_HUMAN Exocyst complex component 1 OS=Homo sapiens OX=9606 GN=EXOC1 PE=1 SV=4	1	13	13	13	21.3	101.98	1170800	448200	2.61223
O75128	Protein cordon-bleu	COBL	FUNCTION: Plays an important role in the reorganization of the actin cytoskeleton. Regulates neuron morphogenesis and increases branching of axons and dendrites. Regulates dendrite branching in Purkinje cells (By similarity). Binds to and sequesters actin monomers (G actin). Nucleates actin polymerization by assembling three actin monomers in cross-filament orientation and thereby promotes growth…	sp|O75128|COBL_HUMAN	sp|O75128|COBL_HUMAN Protein cordon-bleu OS=Homo sapiens OX=9606 GN=COBL PE=1 SV=2	1	3	3	3	3.7	135.62	176210	67458	2.61214
Q8N6T3	ADP-ribosylation factor GTPase-activating protein 1	ARFGAP1	FUNCTION: GTPase-activating protein (GAP) for the ADP ribosylation factor 1 (ARF1). Involved in membrane trafficking and /or vesicle transport. Promotes hydrolysis of the ARF1-bound GTP and thus, is required for the dissociation of coat proteins from Golgi-derived membranes and vesicles, a prerequisite for vesicle's fusion with target compartment. Probably regulates ARF1-mediated transport via it…	sp|Q8N6T3|ARFG1_HUMAN	sp|Q8N6T3|ARFG1_HUMAN ADP-ribosylation factor GTPase-activating protein 1 OS=Homo sapiens OX=9606 GN=ARFGAP1 PE=1 SV=2	1	10	10	10	35.2	44.667	2972800	1142900	2.6011
Q9H967	WD repeat-containing protein 76	WDR76	FUNCTION: Specifically binds 5-hydroxymethylcytosine (5hmC), suggesting that it acts as a specific reader of 5hmC. {ECO:0000250}.	sp|Q9H967|WDR76_HUMAN	sp|Q9H967|WDR76_HUMAN WD repeat-containing protein 76 OS=Homo sapiens OX=9606 GN=WDR76 PE=1 SV=2	1	1	1	1	2.9	69.768	23779	9146	2.59993
P61081	NEDD8-conjugating enzyme Ubc12	UBE2M	FUNCTION: Accepts the ubiquitin-like protein NEDD8 from the UBA3-NAE1 E1 complex and catalyzes its covalent attachment to other proteins. The specific interaction with the E3 ubiquitin ligase RBX1, but not RBX2, suggests that the RBX1-UBE2M complex neddylates specific target proteins, such as CUL1, CUL2, CUL3 and CUL4. Involved in cell proliferation. {ECO:0000269|PubMed:10207026, ECO:0000269|PubM…	sp|P61081|UBC12_HUMAN	sp|P61081|UBC12_HUMAN NEDD8-conjugating enzyme Ubc12 OS=Homo sapiens OX=9606 GN=UBE2M PE=1 SV=1	1	7	7	7	36.1	20.9	2473200	953080	2.59496
Q6PJT7	Zinc finger CCCH domain-containing protein 14	ZC3H14	FUNCTION: Involved in poly(A) tail length control in neuronal cells. Binds the polyadenosine RNA oligonucleotides. {ECO:0000269|PubMed:17630287, ECO:0000269|PubMed:24671764}.	sp|Q6PJT7|ZC3HE_HUMAN	sp|Q6PJT7|ZC3HE_HUMAN Zinc finger CCCH domain-containing protein 14 OS=Homo sapiens OX=9606 GN=ZC3H14 PE=1 SV=1	1	15	15	15	26.2	82.875	1816800	701120	2.59128
Q9H2C0	Gigaxonin	GAN	FUNCTION: Probable cytoskeletal component that directly or indirectly plays an important role in neurofilament architecture. May act as a substrate-specific adapter of an E3 ubiquitin-protein ligase complex which mediates the ubiquitination and subsequent proteasomal degradation of target proteins. Controls degradation of TBCB. Controls degradation of MAP1B and MAP1S, and is critical for neuronal…	sp|Q9H2C0|GAN_HUMAN	sp|Q9H2C0|GAN_HUMAN Gigaxonin OS=Homo sapiens OX=9606 GN=GAN PE=1 SV=1	1	2	2	2	4	67.638	213010	82294	2.5884
P16220	Cyclic AMP-responsive element-binding protein 1	CREB1	FUNCTION: Phosphorylation-dependent transcription factor that stimulates transcription upon binding to the DNA cAMP response element (CRE), a sequence present in many viral and cellular promoters. Transcription activation is enhanced by the TORC coactivators which act independently of Ser-133 phosphorylation. Involved in different cellular processes including the synchronization of circadian rhyt…	sp|P16220|CREB1_HUMAN;sp|P18846|ATF1_HUMAN	sp|P16220|CREB1_HUMAN Cyclic AMP-responsive element-binding protein 1 OS=Homo sapiens OX=9606 GN=CREB1 PE=1 SV=3	2	4	4	4	16.2	35.136	690010	267050	2.58382
P35914	Hydroxymethylglutaryl-CoA lyase, mitochondrial	HMGCL	FUNCTION: Mitochondrial 3-hydroxymethyl-3-methylglutaryl-CoA lyase that catalyzes a cation-dependent cleavage of (S)-3-hydroxy-3-methylglutaryl-CoA into acetyl-CoA and acetoacetate, a key step in ketogenesis. Terminal step in leucine catabolism. Ketone bodies (beta-hydroxybutyrate, acetoacetate and acetone) are essential as an alternative source of energy to glucose, as lipid precursors and as re…	sp|P35914|HMGCL_HUMAN	sp|P35914|HMGCL_HUMAN Hydroxymethylglutaryl-CoA lyase, mitochondrial OS=Homo sapiens OX=9606 GN=HMGCL PE=1 SV=2	1	5	5	5	20.6	34.36	1059300	411660	2.57324
Q5VU43	Myomegalin	PDE4DIP	FUNCTION: Functions as an anchor sequestering components of the cAMP-dependent pathway to Golgi and/or centrosomes (By similarity). {ECO:0000250|UniProtKB:Q9WUJ3}.; FUNCTION: [Isoform 13]: Participates in microtubule dynamics, promoting microtubule assembly. Depending upon the cell context, may act at the level of the Golgi apparatus or that of the centrosome (PubMed:25217626, PubMed:27666745, Pu…	sp|Q5VU43|MYOME_HUMAN	sp|Q5VU43|MYOME_HUMAN Myomegalin OS=Homo sapiens OX=9606 GN=PDE4DIP PE=1 SV=3	1	4	4	4	2.9	265.1	90240	35121	2.5694
Q53HC9	EARP and GARP complex-interacting protein 1	EIPR1	FUNCTION: Acts as a component of endosomal retrieval machinery that is involved in protein transport from early endosomes to either recycling endosomes or the trans-Golgi network. Mediates the recruitment of Golgi-associated retrograde protein (GARP) complex to the trans-Golgi network and controls early endosome-to-Golgi transport of internalized protein. Promotes the recycling of internalized tr…	sp|Q53HC9|EIPR1_HUMAN	sp|Q53HC9|EIPR1_HUMAN EARP and GARP complex-interacting protein 1 OS=Homo sapiens OX=9606 GN=EIPR1 PE=1 SV=2	1	7	7	7	28.7	43.603	688240	267900	2.56902
Q13636	Ras-related protein Rab-31	RAB31	FUNCTION: The small GTPases Rab are key regulators of intracellular membrane trafficking, from the formation of transport vesicles to their fusion with membranes. Rabs cycle between an inactive GDP-bound form and an active GTP-bound form that is able to recruit to membranes different set of downstream effectors directly responsible for vesicle formation, movement, tethering and fusion. Required f…	sp|Q13636|RAB31_HUMAN	sp|Q13636|RAB31_HUMAN Ras-related protein Rab-31 OS=Homo sapiens OX=9606 GN=RAB31 PE=1 SV=1	1	4	4	3	29.9	21.569	1001800	390100	2.56806
Q6ZVM7	TOM1-like protein 2	TOM1L2	FUNCTION: Probable role in protein transport. May regulate growth factor-induced mitogenic signaling. {ECO:0000269|PubMed:16412388, ECO:0000269|PubMed:16479011}.	sp|Q6ZVM7|TM1L2_HUMAN	sp|Q6ZVM7|TM1L2_HUMAN TOM1-like protein 2 OS=Homo sapiens OX=9606 GN=TOM1L2 PE=1 SV=1	1	3	3	3	14.6	55.556	193600	75595	2.56102
Q3KRA9	Alpha-ketoglutarate-dependent dioxygenase alkB homolog 6	ALKBH6	FUNCTION: Probable dioxygenase that requires molecular oxygen, alpha-ketoglutarate and iron. {ECO:0000250}.	sp|Q3KRA9|ALKB6_HUMAN	sp|Q3KRA9|ALKB6_HUMAN Alpha-ketoglutarate-dependent dioxygenase alkB homolog 6 OS=Homo sapiens OX=9606 GN=ALKBH6 PE=1 SV=2	1	1	1	1	8.4	26.483	152180	59714	2.54848
Q08J23	RNA cytosine C(5)-methyltransferase NSUN2	NSUN2	FUNCTION: RNA cytosine C(5)-methyltransferase that methylates cytosine to 5-methylcytosine (m5C) in various RNAs, such as tRNAs, mRNAs and some long non-coding RNAs (lncRNAs) (PubMed:17071714, PubMed:22995836, PubMed:31358969, PubMed:31199786). Involved in various processes, such as epidermal stem cell differentiation, testis differentiation and maternal to zygotic transition during early develop…	sp|Q08J23|NSUN2_HUMAN	sp|Q08J23|NSUN2_HUMAN RNA cytosine C(5)-methyltransferase NSUN2 OS=Homo sapiens OX=9606 GN=NSUN2 PE=1 SV=2	1	24	24	24	44.2	86.47	12291000	4834600	2.5423
P10398	Serine/threonine-protein kinase A-Raf	ARAF	FUNCTION: Involved in the transduction of mitogenic signals from the cell membrane to the nucleus. May also regulate the TOR signaling cascade. {ECO:0000269|PubMed:22609986}.; FUNCTION: [Isoform 2]: Serves as a positive regulator of myogenic differentiation by inducing cell cycle arrest, the expression of myogenin and other muscle-specific proteins, and myotube formation. {ECO:0000269|PubMed:2260…	sp|P10398|ARAF_HUMAN	sp|P10398|ARAF_HUMAN Serine/threonine-protein kinase A-Raf OS=Homo sapiens OX=9606 GN=ARAF PE=1 SV=2	1	5	2	2	10.6	67.585	195510	76998	2.53916
Q12768	WASH complex subunit 5	WASHC5	FUNCTION: Acts as a component of the WASH core complex that functions as a nucleation-promoting factor (NPF) at the surface of endosomes, where it recruits and activates the Arp2/3 complex to induce actin polymerization, playing a key role in the fission of tubules that serve as transport intermediates during endosome sorting (PubMed:19922875, PubMed:20498093). May be involved in axonal outgrowth…	sp|Q12768|WASC5_HUMAN	sp|Q12768|WASC5_HUMAN WASH complex subunit 5 OS=Homo sapiens OX=9606 GN=WASHC5 PE=1 SV=1	1	12	12	12	14	134.28	1739800	685600	2.53763
Q96KQ7	Histone-lysine N-methyltransferase EHMT2	EHMT2	FUNCTION: Histone methyltransferase that specifically mono- and dimethylates 'Lys-9' of histone H3 (H3K9me1 and H3K9me2, respectively) in euchromatin. H3K9me represents a specific tag for epigenetic transcriptional repression by recruiting HP1 proteins to methylated histones. Also mediates monomethylation of 'Lys-56' of histone H3 (H3K56me1) in G1 phase, leading to promote interaction between his…	sp|Q96KQ7|EHMT2_HUMAN	sp|Q96KQ7|EHMT2_HUMAN Histone-lysine N-methyltransferase EHMT2 OS=Homo sapiens OX=9606 GN=EHMT2 PE=1 SV=3	1	7	7	7	7.9	132.37	304780	120160	2.53645
Q92890	Ubiquitin recognition factor in ER-associated degradation protein 1	UFD1	FUNCTION: Essential component of the ubiquitin-dependent proteolytic pathway which degrades ubiquitin fusion proteins. The ternary complex containing UFD1, VCP and NPLOC4 binds ubiquitinated proteins and is necessary for the export of misfolded proteins from the ER to the cytoplasm, where they are degraded by the proteasome. The NPLOC4-UFD1-VCP complex regulates spindle disassembly at the end of …	sp|Q92890|UFD1_HUMAN	sp|Q92890|UFD1_HUMAN Ubiquitin recognition factor in ER-associated degradation protein 1 OS=Homo sapiens OX=9606 GN=UFD1 PE=1 SV=3	1	9	9	9	44.6	34.5	2301200	909990	2.52882
P52306	Rap1 GTPase-GDP dissociation stimulator 1	RAP1GDS1	FUNCTION: Stimulates GDP/GTP exchange reaction of a group of small GTP-binding proteins (G proteins) including Rap1a/Rap1b, RhoA, RhoB and KRas, by stimulating the dissociation of GDP from and the subsequent binding of GTP to each small G protein.	sp|P52306|GDS1_HUMAN	sp|P52306|GDS1_HUMAN Rap1 GTPase-GDP dissociation stimulator 1 OS=Homo sapiens OX=9606 GN=RAP1GDS1 PE=1 SV=3	1	5	5	5	12.4	66.316	428520	169750	2.52442
Q9H3P2	Negative elongation factor A	NELFA	FUNCTION: Essential component of the NELF complex, a complex that negatively regulates the elongation of transcription by RNA polymerase II. The NELF complex, which acts via an association with the DSIF complex and causes transcriptional pausing, is counteracted by the P-TEFb kinase complex. {ECO:0000269|PubMed:10199401, ECO:0000269|PubMed:12563561, ECO:0000269|PubMed:12612062}.; FUNCTION: (Micro…	sp|Q9H3P2|NELFA_HUMAN	sp|Q9H3P2|NELFA_HUMAN Negative elongation factor A OS=Homo sapiens OX=9606 GN=NELFA PE=1 SV=3	1	8	8	8	25.9	57.276	1210100	480530	2.51826
Q8N5I2	Arrestin domain-containing protein 1	ARRDC1	FUNCTION: Functions as an adapter recruiting ubiquitin-protein ligases to their specific substrates (PubMed:23886940, PubMed:27462458). Through an ubiquitination-dependent mechanism plays for instance a role in the incorporation of SLC11A2 into extracellular vesicles (PubMed:27462458). More generally, plays a role in the extracellular transport of proteins between cells through the release in the…	sp|Q8N5I2|ARRD1_HUMAN	sp|Q8N5I2|ARRD1_HUMAN Arrestin domain-containing protein 1 OS=Homo sapiens OX=9606 GN=ARRDC1 PE=1 SV=1	1	1	1	1	2.8	45.981	40204	15974	2.51684
Q8WVV9	Heterogeneous nuclear ribonucleoprotein L-like	HNRNPLL	FUNCTION: RNA-binding protein that functions as regulator of alternative splicing for multiple target mRNAs, including PTPRC/CD45 and STAT5A. Required for alternative splicing of PTPRC. {ECO:0000269|PubMed:18669861}.	sp|Q8WVV9|HNRLL_HUMAN	sp|Q8WVV9|HNRLL_HUMAN Heterogeneous nuclear ribonucleoprotein L-like OS=Homo sapiens OX=9606 GN=HNRNPLL PE=1 SV=1	1	13	12	12	38.6	60.082	3671200	1462900	2.50954
P82970	High mobility group nucleosome-binding domain-containing protein 5	HMGN5	FUNCTION: Preferentially binds to euchromatin and modulates cellular transcription by counteracting linker histone-mediated chromatin compaction. {ECO:0000250}.	sp|P82970|HMGN5_HUMAN	sp|P82970|HMGN5_HUMAN High mobility group nucleosome-binding domain-containing protein 5 OS=Homo sapiens OX=9606 GN=HMGN5 PE=1 SV=1	1	4	4	4	22.7	31.524	288420	114930	2.50953
Q9UFC0	Leucine-rich repeat and WD repeat-containing protein 1	LRWD1	FUNCTION: Required for G1/S transition. Recruits and stabilizes the origin recognition complex (ORC) onto chromatin during G1 to establish pre-replication complex (preRC) and to heterochromatic sites in post-replicated cells. Binds a combination of DNA and histone methylation repressive marks on heterochromatin. Binds histone H3 and H4 trimethylation marks H3K9me3, H3K27me3 and H4K20me3 in a coop…	sp|Q9UFC0|LRWD1_HUMAN	sp|Q9UFC0|LRWD1_HUMAN Leucine-rich repeat and WD repeat-containing protein 1 OS=Homo sapiens OX=9606 GN=LRWD1 PE=1 SV=2	1	13	13	13	31.7	70.86	1880200	749550	2.50844
P05089	Arginase-1	ARG1	FUNCTION: Key element of the urea cycle converting L-arginine to urea and L-ornithine, which is further metabolized into metabolites proline and polyamides that drive collagen synthesis and bioenergetic pathways critical for cell proliferation, respectively; the urea cycle takes place primarily in the liver and, to a lesser extent, in the kidneys. {ECO:0000305}.; FUNCTION: Functions in L-arginine…	sp|P05089|ARGI1_HUMAN	sp|P05089|ARGI1_HUMAN Arginase-1 OS=Homo sapiens OX=9606 GN=ARG1 PE=1 SV=2	1	3	3	3	8.7	34.735	22581	9031.4	2.50028
Q99719	Septin-5	SEPTIN5	FUNCTION: Filament-forming cytoskeletal GTPase (By similarity). May play a role in cytokinesis (Potential). May play a role in platelet secretion (By similarity). {ECO:0000250, ECO:0000305}.	sp|Q99719|SEPT5_HUMAN	sp|Q99719|SEPT5_HUMAN Septin-5 OS=Homo sapiens OX=9606 GN=SEPTIN5 PE=1 SV=1	1	3	3	3	12.2	42.777	178570	71496	2.49762
Q04917	14-3-3 protein eta	YWHAH	FUNCTION: Adapter protein implicated in the regulation of a large spectrum of both general and specialized signaling pathways. Binds to a large number of partners, usually by recognition of a phosphoserine or phosphothreonine motif. Binding generally results in the modulation of the activity of the binding partner. Negatively regulates the kinase activity of PDPK1. {ECO:0000269|PubMed:12177059}.	sp|Q04917|1433F_HUMAN	sp|Q04917|1433F_HUMAN 14-3-3 protein eta OS=Homo sapiens OX=9606 GN=YWHAH PE=1 SV=4	1	10	7	7	44.7	28.218	3937500	1579600	2.49272
Q9NPJ3	Acyl-coenzyme A thioesterase 13	ACOT13	FUNCTION: Acyl-CoA thioesterases are a group of enzymes that catalyze the hydrolysis of acyl-CoAs to the free fatty acid and coenzyme A (CoASH), providing the potential to regulate intracellular levels of acyl-CoAs, free fatty acids and CoASH. Has acyl-CoA thioesterase activity towards medium (C12) and long-chain (C18) fatty acyl-CoA substrates. Can also hydrolyze 3-hydroxyphenylacetyl-CoA and 3,…	sp|Q9NPJ3|ACO13_HUMAN	sp|Q9NPJ3|ACO13_HUMAN Acyl-coenzyme A thioesterase 13 OS=Homo sapiens OX=9606 GN=ACOT13 PE=1 SV=1	1	3	3	3	30.7	14.96	2730500	1097300	2.48838
O75164	Lysine-specific demethylase 4A	KDM4A	FUNCTION: Histone demethylase that specifically demethylates 'Lys-9' and 'Lys-36' residues of histone H3, thereby playing a central role in histone code (PubMed:26741168). Does not demethylate histone H3 'Lys-4', H3 'Lys-27' nor H4 'Lys-20'. Demethylates trimethylated H3 'Lys-9' and H3 'Lys-36' residue, while it has no activity on mono- and dimethylated residues. Demethylation of Lys residue gene…	sp|O75164|KDM4A_HUMAN	sp|O75164|KDM4A_HUMAN Lysine-specific demethylase 4A OS=Homo sapiens OX=9606 GN=KDM4A PE=1 SV=2	1	3	3	3	3.7	120.66	86151	34647	2.48654
Q6ZSJ8	Uncharacterized protein C1orf122	C1orf122		sp|Q6ZSJ8|CA122_HUMAN	sp|Q6ZSJ8|CA122_HUMAN Uncharacterized protein C1orf122 OS=Homo sapiens OX=9606 GN=C1orf122 PE=4 SV=2	1	3	3	3	33.6	11.471	370450	149330	2.48075
Q02040	A-kinase anchor protein 17A	AKAP17A	FUNCTION: Splice factor regulating alternative splice site selection for certain mRNA precursors. Mediates regulation of pre-mRNA splicing in a PKA-dependent manner. {ECO:0000269|PubMed:16982639, ECO:0000269|PubMed:19840947}.	sp|Q02040|AK17A_HUMAN	sp|Q02040|AK17A_HUMAN A-kinase anchor protein 17A OS=Homo sapiens OX=9606 GN=AKAP17A PE=1 SV=2	1	6	6	6	11.8	80.735	373270	150690	2.47707
Q9NXA8	NAD-dependent protein deacylase sirtuin-5, mitochondrial	SIRT5	FUNCTION: NAD-dependent lysine demalonylase, desuccinylase and deglutarylase that specifically removes malonyl, succinyl and glutaryl groups on target proteins (PubMed:21908771, PubMed:22076378, PubMed:24703693, PubMed:29180469). Activates CPS1 and contributes to the regulation of blood ammonia levels during prolonged fasting: acts by mediating desuccinylation and deglutarylation of CPS1, thereby…	sp|Q9NXA8|SIR5_HUMAN	sp|Q9NXA8|SIR5_HUMAN NAD-dependent protein deacylase sirtuin-5, mitochondrial OS=Homo sapiens OX=9606 GN=SIRT5 PE=1 SV=2	1	8	8	8	32.9	33.881	1331600	538920	2.47087
Q9BRP4	Proteasomal ATPase-associated factor 1	PAAF1	FUNCTION: Inhibits proteasome 26S assembly and proteolytic activity by impairing the association of the 19S regulatory complex with the 20S core. In case of HIV-1 infection, recruited by viral Tat to the HIV-1 promoter, where it promotes the recruitment of 19S regulatory complex through dissociation of the proteasome 26S. This presumably promotes provirus transcription efficiency. Protects SUPT6H…	sp|Q9BRP4|PAAF1_HUMAN	sp|Q9BRP4|PAAF1_HUMAN Proteasomal ATPase-associated factor 1 OS=Homo sapiens OX=9606 GN=PAAF1 PE=1 SV=2	1	3	3	3	9.7	42.19	364570	148400	2.45667
Q9UKA2	F-box/LRR-repeat protein 4	FBXL4		sp|Q9UKA2|FBXL4_HUMAN	sp|Q9UKA2|FBXL4_HUMAN F-box/LRR-repeat protein 4 OS=Homo sapiens OX=9606 GN=FBXL4 PE=1 SV=2	1	6	6	6	15.9	70.096	251850	103170	2.44112
Q8WWC4	m-AAA protease-interacting protein 1, mitochondrial	MAIP1	FUNCTION: Promotes sorting of SMDT1/EMRE in mitochondria by ensuring its maturation (PubMed:27642048). Interacts with the transit peptide region of SMDT1/EMRE precursor protein in the mitochondrial matrix, leading to protect it against protein degradation by YME1L1, thereby ensuring SMDT1/EMRE maturation by the mitochondrial processing peptidase (PMPCA and PMPCB) (PubMed:27642048). {ECO:0000269|P…	sp|Q8WWC4|MAIP1_HUMAN	sp|Q8WWC4|MAIP1_HUMAN m-AAA protease-interacting protein 1, mitochondrial OS=Homo sapiens OX=9606 GN=MAIP1 PE=1 SV=1	1	3	3	3	11	32.544	749290	308270	2.43063
Q96BD5	PHD finger protein 21A	PHF21A	FUNCTION: Component of the BHC complex, a corepressor complex that represses transcription of neuron-specific genes in non-neuronal cells. The BHC complex is recruited at RE1/NRSE sites by REST and acts by deacetylating and demethylating specific sites on histones, thereby acting as a chromatin modifier. In the BHC complex, it may act as a scaffold. Inhibits KDM1A-mediated demethylation of 'Lys-4…	sp|Q96BD5|PF21A_HUMAN	sp|Q96BD5|PF21A_HUMAN PHD finger protein 21A OS=Homo sapiens OX=9606 GN=PHF21A PE=1 SV=1	1	2	2	2	4.9	74.853	132420	54512	2.42919
Q8WX93	Palladin	PALLD	FUNCTION: Cytoskeletal protein required for organization of normal actin cytoskeleton. Roles in establishing cell morphology, motility, cell adhesion and cell-extracellular matrix interactions in a variety of cell types. May function as a scaffolding molecule with the potential to influence both actin polymerization and the assembly of existing actin filaments into higher-order arrays. Binds to p…	sp|Q8WX93|PALLD_HUMAN	sp|Q8WX93|PALLD_HUMAN Palladin OS=Homo sapiens OX=9606 GN=PALLD PE=1 SV=3	1	7	7	7	8.7	150.56	565220	232750	2.42844
Q8TDD1	ATP-dependent RNA helicase DDX54	DDX54	FUNCTION: Has RNA-dependent ATPase activity. Represses the transcriptional activity of nuclear receptors. {ECO:0000269|PubMed:12466272}.	sp|Q8TDD1|DDX54_HUMAN	sp|Q8TDD1|DDX54_HUMAN ATP-dependent RNA helicase DDX54 OS=Homo sapiens OX=9606 GN=DDX54 PE=1 SV=2	1	4	4	4	6.5	98.594	387080	159440	2.42775
Q86Y56	Dynein axonemal assembly factor 5	DNAAF5	FUNCTION: Cytoplasmic protein involved in the delivery of the dynein machinery to the motile cilium. It is required for the assembly of the axonemal dynein inner and outer arms, two structures attached to the peripheral outer doublet A microtubule of the axoneme, that play a crucial role in cilium motility. {ECO:0000269|PubMed:23040496, ECO:0000269|PubMed:25232951}.	sp|Q86Y56|DAAF5_HUMAN	sp|Q86Y56|DAAF5_HUMAN Dynein axonemal assembly factor 5 OS=Homo sapiens OX=9606 GN=DNAAF5 PE=1 SV=4	1	13	13	13	22.7	93.52	2289300	943280	2.42696
Q5VST6	Alpha/beta hydrolase domain-containing protein 17B	ABHD17B	FUNCTION: Hydrolyzes fatty acids from S-acylated cysteine residues in proteins (PubMed:26701913). Has depalmitoylating activity towards DLG4/PSD95 (PubMed:26701913). Has depalmitoylating activity towards GAP43 (By similarity). Has depalmitoylating activity towards MAP6 (By similarity). Has depalmitoylating activity towards NRAS (PubMed:26701913). {ECO:0000250|UniProtKB:Q7M759, ECO:0000269|PubMed:…	sp|Q5VST6|AB17B_HUMAN	sp|Q5VST6|AB17B_HUMAN Alpha/beta hydrolase domain-containing protein 17B OS=Homo sapiens OX=9606 GN=ABHD17B PE=1 SV=1	1	4	4	4	26.4	32.214	469940	193720	2.42587
P09104	Gamma-enolase	ENO2	FUNCTION: Has neurotrophic and neuroprotective properties on a broad spectrum of central nervous system (CNS) neurons. Binds, in a calcium-dependent manner, to cultured neocortical neurons and promotes cell survival (By similarity). {ECO:0000250}.	sp|P09104|ENOG_HUMAN	sp|P09104|ENOG_HUMAN Gamma-enolase OS=Homo sapiens OX=9606 GN=ENO2 PE=1 SV=3	1	10	7	6	32.5	47.268	2267700	934910	2.42558
Q8NDZ6	Transmembrane protein 161B	TMEM161B		sp|Q8NDZ6|T161B_HUMAN	sp|Q8NDZ6|T161B_HUMAN Transmembrane protein 161B OS=Homo sapiens OX=9606 GN=TMEM161B PE=2 SV=1	1	2	2	2	4.9	55.481	117050	48266	2.4251
Q9HCD5	Nuclear receptor coactivator 5	NCOA5	FUNCTION: Nuclear receptor coregulator that can have both coactivator and corepressor functions. Interacts with nuclear receptors for steroids (ESR1 and ESR2) independently of the steroid binding domain (AF-2) of the ESR receptors, and with the orphan nuclear receptor NR1D2. Involved in the coactivation of nuclear steroid receptors (ER) as well as the corepression of MYC in response to 17-beta-es…	sp|Q9HCD5|NCOA5_HUMAN	sp|Q9HCD5|NCOA5_HUMAN Nuclear receptor coactivator 5 OS=Homo sapiens OX=9606 GN=NCOA5 PE=1 SV=2	1	6	6	6	18.3	65.536	723430	298760	2.42144
Q04760	Lactoylglutathione lyase	GLO1	FUNCTION: Catalyzes the conversion of hemimercaptal, formed from methylglyoxal and glutathione, to S-lactoylglutathione. Involved in the regulation of TNF-induced transcriptional activity of NF-kappa-B. Required for normal osteoclastogenesis. {ECO:0000269|PubMed:19199007, ECO:0000269|PubMed:23122816, ECO:0000269|PubMed:9705294}.	sp|Q04760|LGUL_HUMAN	sp|Q04760|LGUL_HUMAN Lactoylglutathione lyase OS=Homo sapiens OX=9606 GN=GLO1 PE=1 SV=4	1	12	12	12	70.7	20.777	21249000	8784700	2.41886
Q8TEW0	Partitioning defective 3 homolog	PARD3	FUNCTION: Adapter protein involved in asymmetrical cell division and cell polarization processes (PubMed:27925688, PubMed:10954424). Seems to play a central role in the formation of epithelial tight junctions (PubMed:27925688). Targets the phosphatase PTEN to cell junctions (By similarity). Involved in Schwann cell peripheral myelination (By similarity). Association with PARD6B may prevent the in…	sp|Q8TEW0|PARD3_HUMAN	sp|Q8TEW0|PARD3_HUMAN Partitioning defective 3 homolog OS=Homo sapiens OX=9606 GN=PARD3 PE=1 SV=2	1	13	13	13	11.4	151.42	490780	203470	2.41205
Q15032	R3H domain-containing protein 1	R3HDM1		sp|Q15032|R3HD1_HUMAN	sp|Q15032|R3HD1_HUMAN R3H domain-containing protein 1 OS=Homo sapiens OX=9606 GN=R3HDM1 PE=1 SV=3	1	3	3	3	2.7	120.69	462150	191610	2.41193
Q15139	Serine/threonine-protein kinase D1	PRKD1	FUNCTION: Serine/threonine-protein kinase that converts transient diacylglycerol (DAG) signals into prolonged physiological effects downstream of PKC, and is involved in the regulation of MAPK8/JNK1 and Ras signaling, Golgi membrane integrity and trafficking, cell survival through NF-kappa-B activation, cell migration, cell differentiation by mediating HDAC7 nuclear export, cell proliferation via…	sp|Q15139|KPCD1_HUMAN	sp|Q15139|KPCD1_HUMAN Serine/threonine-protein kinase D1 OS=Homo sapiens OX=9606 GN=PRKD1 PE=1 SV=2	1	5	3	3	9.2	101.7	88340	36690	2.40774
Q96RT1	Erbin	ERBIN	FUNCTION: Acts as an adapter for the receptor ERBB2, in epithelia. By binding the unphosphorylated 'Tyr-1248' of receptor ERBB2, it may contribute to stabilize this unphosphorylated state (PubMed:16203728). Inhibits NOD2-dependent NF-kappa-B signaling and proinflammatory cytokine secretion (PubMed:16203728). {ECO:0000269|PubMed:10878805, ECO:0000269|PubMed:16203728}.	sp|Q96RT1|ERBIN_HUMAN	sp|Q96RT1|ERBIN_HUMAN Erbin OS=Homo sapiens OX=9606 GN=ERBIN PE=1 SV=2	1	13	13	13	13.6	158.3	894360	371930	2.40465
Q96CU9	FAD-dependent oxidoreductase domain-containing protein 1	FOXRED1	FUNCTION: Required for the assembly of the mitochondrial membrane respiratory chain NADH dehydrogenase (Complex I) (PubMed:20858599, PubMed:25678554). Involved in mid-late stages of complex I assembly (PubMed:25678554). {ECO:0000269|PubMed:20858599, ECO:0000269|PubMed:25678554}.	sp|Q96CU9|FXRD1_HUMAN	sp|Q96CU9|FXRD1_HUMAN FAD-dependent oxidoreductase domain-containing protein 1 OS=Homo sapiens OX=9606 GN=FOXRED1 PE=1 SV=2	1	4	4	4	13	53.811	806080	335320	2.40391
Q99590	Protein SCAF11	SCAF11	FUNCTION: Plays a role in pre-mRNA alternative splicing by regulating spliceosome assembly. {ECO:0000269|PubMed:9447963}.	sp|Q99590|SCAFB_HUMAN	sp|Q99590|SCAFB_HUMAN Protein SCAF11 OS=Homo sapiens OX=9606 GN=SCAF11 PE=1 SV=2	1	2	2	2	1.4	164.65	32194	13411	2.40057
Q9UQ88	Cyclin-dependent kinase 11A	CDK11A	FUNCTION: Appears to play multiple roles in cell cycle progression, cytokinesis and apoptosis. The p110 isoforms have been suggested to be involved in pre-mRNA splicing, potentially by phosphorylating the splicing protein SFRS7. The p58 isoform may act as a negative regulator of normal cell cycle progression. {ECO:0000269|PubMed:12501247, ECO:0000269|PubMed:12624090}.	sp|Q9UQ88|CD11A_HUMAN;sp|P21127|CD11B_HUMAN	sp|Q9UQ88|CD11A_HUMAN Cyclin-dependent kinase 11A OS=Homo sapiens OX=9606 GN=CDK11A PE=1 SV=4;sp|P21127|CD11B_HUMAN Cyclin-dependent kinase 11B OS=Homo sapiens OX=9606 GN=CDK11B PE=1 SV=4	2	8	8	8	11.4	91.361	752660	314320	2.39457
Q9P2E5	Chondroitin sulfate glucuronyltransferase	CHPF2	FUNCTION: Transfers glucuronic acid (GlcUA) from UDP-GlcUA to N-acetylgalactosamine residues on the non-reducing end of the elongating chondroitin polymer. Has no N-acetylgalactosaminyltransferase activity. {ECO:0000269|PubMed:12145278, ECO:0000269|PubMed:18316376}.	sp|Q9P2E5|CHPF2_HUMAN	sp|Q9P2E5|CHPF2_HUMAN Chondroitin sulfate glucuronyltransferase OS=Homo sapiens OX=9606 GN=CHPF2 PE=2 SV=2	1	2	2	2	4.3	85.947	28306	11821	2.39455
O94964	Protein SOGA1	SOGA1	FUNCTION: Regulates autophagy by playing a role in the reduction of glucose production in an adiponectin- and insulin-dependent manner. {ECO:0000250}.	sp|O94964|SOGA1_HUMAN	sp|O94964|SOGA1_HUMAN Protein SOGA1 OS=Homo sapiens OX=9606 GN=SOGA1 PE=1 SV=2	1	3	3	3	3.1	159.76	151020	63131	2.39217
Q6UWP8	Suprabasin	SBSN		sp|Q6UWP8|SBSN_HUMAN	sp|Q6UWP8|SBSN_HUMAN Suprabasin OS=Homo sapiens OX=9606 GN=SBSN PE=1 SV=2	1	6	6	6	25.4	60.54	400430	167630	2.38877
Q6P3W7	SCY1-like protein 2	SCYL2	FUNCTION: Component of AP2-containing clathrin coated structures at the plasma membrane or of endocytic coated vesicles. According to PubMed:15809293, probable serine/threonine-protein kinase that phosphorylates, in vitro, the beta2-subunit of the plasma membrane adapter complex AP2 and other proteins in presence of poly-L-lysine. According to PubMed:16914521, has no detectable kinase activity in…	sp|Q6P3W7|SCYL2_HUMAN	sp|Q6P3W7|SCYL2_HUMAN SCY1-like protein 2 OS=Homo sapiens OX=9606 GN=SCYL2 PE=1 SV=1	1	8	8	8	12.9	103.71	730250	306030	2.3862
P51665	26S proteasome non-ATPase regulatory subunit 7	PSMD7	FUNCTION: Component of the 26S proteasome, a multiprotein complex involved in the ATP-dependent degradation of ubiquitinated proteins. This complex plays a key role in the maintenance of protein homeostasis by removing misfolded or damaged proteins, which could impair cellular functions, and by removing proteins whose functions are no longer required. Therefore, the proteasome participates in num…	sp|P51665|PSMD7_HUMAN	sp|P51665|PSMD7_HUMAN 26S proteasome non-ATPase regulatory subunit 7 OS=Homo sapiens OX=9606 GN=PSMD7 PE=1 SV=2	1	10	10	10	42.6	37.025	3065200	1287200	2.38129
Q9C0J8	pre-mRNA 3 end processing protein WDR33	WDR33	FUNCTION: Essential for both cleavage and polyadenylation of pre-mRNA 3' ends. {ECO:0000269|PubMed:19217410}.	sp|Q9C0J8|WDR33_HUMAN	sp|Q9C0J8|WDR33_HUMAN pre-mRNA 3 end processing protein WDR33 OS=Homo sapiens OX=9606 GN=WDR33 PE=1 SV=2	1	10	10	10	9.8	145.89	364910	153440	2.37819
Q8NFC6	Biorientation of chromosomes in cell division protein 1-like 1	BOD1L1	FUNCTION: Component of the fork protection machinery required to protect stalled/damaged replication forks from uncontrolled DNA2-dependent resection. Acts by stabilizing RAD51 at stalled replication forks and protecting RAD51 nucleofilaments from the antirecombinogenic activities of FBH1 and BLM (PubMed:26166705). Does not regulate spindle orientation (PubMed:26166705). {ECO:0000269|PubMed:26166…	sp|Q8NFC6|BD1L1_HUMAN	sp|Q8NFC6|BD1L1_HUMAN Biorientation of chromosomes in cell division protein 1-like 1 OS=Homo sapiens OX=9606 GN=BOD1L1 PE=1 SV=2	1	21	21	20	12	330.46	1212800	510690	2.37483
P49768	Presenilin-1	PSEN1	FUNCTION: Catalytic subunit of the gamma-secretase complex, an endoprotease complex that catalyzes the intramembrane cleavage of integral membrane proteins such as Notch receptors and APP (amyloid-beta precursor protein) (PubMed:15274632, PubMed:10545183, PubMed:10593990, PubMed:10206644, PubMed:10899933, PubMed:10811883, PubMed:12679784, PubMed:12740439, PubMed:25043039, PubMed:26280335, PubMed:…	sp|P49768|PSN1_HUMAN	sp|P49768|PSN1_HUMAN Presenilin-1 OS=Homo sapiens OX=9606 GN=PSEN1 PE=1 SV=1	1	5	5	4	15.6	52.667	663320	279690	2.37163
O60437	Periplakin	PPL	FUNCTION: Component of the cornified envelope of keratinocytes. May link the cornified envelope to desmosomes and intermediate filaments. May act as a localization signal in PKB/AKT-mediated signaling. {ECO:0000269|PubMed:9412476}.	sp|O60437|PEPL_HUMAN	sp|O60437|PEPL_HUMAN Periplakin OS=Homo sapiens OX=9606 GN=PPL PE=1 SV=4	1	3	3	3	1.6	204.74	26970	11381	2.36974
Q8IUF8	Ribosomal oxygenase 2	RIOX2	FUNCTION: Oxygenase that can act as both a histone lysine demethylase and a ribosomal histidine hydroxylase. Is involved in the demethylation of trimethylated 'Lys-9' on histone H3 (H3K9me3), leading to an increase in ribosomal RNA expression. Also catalyzes the hydroxylation of 60S ribosomal protein L27a on 'His-39'. May play an important role in cell growth and survival. May be involved in ribo…	sp|Q8IUF8|RIOX2_HUMAN	sp|Q8IUF8|RIOX2_HUMAN Ribosomal oxygenase 2 OS=Homo sapiens OX=9606 GN=RIOX2 PE=1 SV=1	1	3	3	3	8.2	52.8	92271	38938	2.36969
Q9NQT5	Exosome complex component RRP40	EXOSC3	FUNCTION: Non-catalytic component of the RNA exosome complex which has 3'->5' exoribonuclease activity and participates in a multitude of cellular RNA processing and degradation events. In the nucleus, the RNA exosome complex is involved in proper maturation of stable RNA species such as rRNA, snRNA and snoRNA, in the elimination of RNA processing by-products and non-coding 'pervasive' transcript…	sp|Q9NQT5|EXOS3_HUMAN	sp|Q9NQT5|EXOS3_HUMAN Exosome complex component RRP40 OS=Homo sapiens OX=9606 GN=EXOSC3 PE=1 SV=3	1	6	6	6	34.5	29.572	1931200	815610	2.3678
O00459	Phosphatidylinositol 3-kinase regulatory subunit beta	PIK3R2	FUNCTION: Regulatory subunit of phosphoinositide-3-kinase (PI3K), a kinase that phosphorylates PtdIns(4,5)P2 (Phosphatidylinositol 4,5-bisphosphate) to generate phosphatidylinositol 3,4,5-trisphosphate (PIP3). PIP3 plays a key role by recruiting PH domain-containing proteins to the membrane, including AKT1 and PDPK1, activating signaling cascades involved in cell growth, survival, proliferation, …	sp|O00459|P85B_HUMAN	sp|O00459|P85B_HUMAN Phosphatidylinositol 3-kinase regulatory subunit beta OS=Homo sapiens OX=9606 GN=PIK3R2 PE=1 SV=2	1	3	3	3	5.4	81.544	123640	52234	2.36704
Q53T59	HCLS1-binding protein 3	HS1BP3	FUNCTION: May be a modulator of IL-2 signaling. {ECO:0000250}.	sp|Q53T59|H1BP3_HUMAN	sp|Q53T59|H1BP3_HUMAN HCLS1-binding protein 3 OS=Homo sapiens OX=9606 GN=HS1BP3 PE=1 SV=1	1	2	2	2	8.2	42.78	211030	89177	2.36642
Q8N0X7	Spartin	SPART	FUNCTION: May be implicated in endosomal trafficking, or microtubule dynamics, or both. Participates in cytokinesis (PubMed:20719964). {ECO:0000269|PubMed:20719964}.	sp|Q8N0X7|SPART_HUMAN	sp|Q8N0X7|SPART_HUMAN Spartin OS=Homo sapiens OX=9606 GN=SPART PE=1 SV=1	1	7	7	7	19.4	72.832	946020	401220	2.35786
Q2PPJ7	Ral GTPase-activating protein subunit alpha-2	RALGAPA2	FUNCTION: Catalytic subunit of the heterodimeric RalGAP2 complex which acts as a GTPase activator for the Ras-like small GTPases RALA and RALB. {ECO:0000250}.	sp|Q2PPJ7|RGPA2_HUMAN	sp|Q2PPJ7|RGPA2_HUMAN Ral GTPase-activating protein subunit alpha-2 OS=Homo sapiens OX=9606 GN=RALGAPA2 PE=1 SV=2	1	2	2	2	1.9	210.77	44433	18916	2.34896
P43003	Excitatory amino acid transporter 1	SLC1A3	FUNCTION: Sodium-dependent, high-affinity amino acid transporter that mediates the uptake of L-glutamate and also L-aspartate and D-aspartate (PubMed:7521911, PubMed:8123008, PubMed:20477940, PubMed:26690923, PubMed:28032905, PubMed:28424515). Functions as a symporter that transports one amino acid molecule together with two or three Na(+) ions and one proton, in parallel with the counter-transpo…	sp|P43003|EAA1_HUMAN	sp|P43003|EAA1_HUMAN Excitatory amino acid transporter 1 OS=Homo sapiens OX=9606 GN=SLC1A3 PE=1 SV=1	1	2	2	2	5.7	59.572	255800	108920	2.34851
P25311	Zinc-alpha-2-glycoprotein	AZGP1	FUNCTION: Stimulates lipid degradation in adipocytes and causes the extensive fat losses associated with some advanced cancers. May bind polyunsaturated fatty acids.	sp|P25311|ZA2G_HUMAN	sp|P25311|ZA2G_HUMAN Zinc-alpha-2-glycoprotein OS=Homo sapiens OX=9606 GN=AZGP1 PE=1 SV=2	1	5	5	5	21.5	34.258	59859	25574	2.34062
P30520	Adenylosuccinate synthetase isozyme 2	ADSS2	FUNCTION: Plays an important role in the de novo pathway and in the salvage pathway of purine nucleotide biosynthesis. Catalyzes the first committed step in the biosynthesis of AMP from IMP. {ECO:0000250|UniProtKB:P46664}.	sp|P30520|PURA2_HUMAN	sp|P30520|PURA2_HUMAN Adenylosuccinate synthetase isozyme 2 OS=Homo sapiens OX=9606 GN=ADSS2 PE=1 SV=3	1	7	7	7	24.1	50.097	2890200	1237700	2.33514
P11441	Ubiquitin-like protein 4A	UBL4A	FUNCTION: As part of a cytosolic protein quality control complex, the BAG6/BAT3 complex, maintains misfolded and hydrophobic patches-containing proteins in a soluble state and participates in their proper delivery to the endoplasmic reticulum or alternatively can promote their sorting to the proteasome where they undergo degradation (PubMed:20676083, PubMed:21636303, PubMed:21743475, PubMed:28104…	sp|P11441|UBL4A_HUMAN	sp|P11441|UBL4A_HUMAN Ubiquitin-like protein 4A OS=Homo sapiens OX=9606 GN=UBL4A PE=1 SV=1	1	7	7	7	51.6	17.776	1571500	674860	2.32863
P13284	Gamma-interferon-inducible lysosomal thiol reductase	IFI30	FUNCTION: Lysosomal thiol reductase that can reduce protein disulfide bonds. May facilitate the complete unfolding of proteins destined for lysosomal degradation. Plays an important role in antigen processing. Facilitates the generation of MHC class II-restricted epitodes from disulfide bond-containing antigen by the endocytic reduction of disulfide bonds (By similarity). Facilitates also MHC cla…	sp|P13284|GILT_HUMAN	sp|P13284|GILT_HUMAN Gamma-interferon-inducible lysosomal thiol reductase OS=Homo sapiens OX=9606 GN=IFI30 PE=1 SV=3	1	1	1	1	4.4	27.963	101620	43690	2.32593
Q9UMS0	NFU1 iron-sulfur cluster scaffold homolog, mitochondrial	NFU1	FUNCTION: Iron-sulfur cluster scaffold protein which can assemble [4Fe-4S] clusters and deliver them to target proteins. {ECO:0000269|PubMed:12886008, ECO:0000269|PubMed:27818104, ECO:0000269|PubMed:28906594}.	sp|Q9UMS0|NFU1_HUMAN	sp|Q9UMS0|NFU1_HUMAN NFU1 iron-sulfur cluster scaffold homolog, mitochondrial OS=Homo sapiens OX=9606 GN=NFU1 PE=1 SV=2	1	5	5	5	26.4	28.462	3139700	1350700	2.3245
P78318	Immunoglobulin-binding protein 1	IGBP1	FUNCTION: Associated to surface IgM-receptor; may be involved in signal transduction. Involved in regulation of the catalytic activity of the phosphatases PP2A, PP4 and PP6 by protecting their partially folded catalytic subunits from degradative polyubiquitination until they associate with regulatory subunits. {ECO:0000269|PubMed:19818709, ECO:0000269|PubMed:23591866}.	sp|P78318|IGBP1_HUMAN	sp|P78318|IGBP1_HUMAN Immunoglobulin-binding protein 1 OS=Homo sapiens OX=9606 GN=IGBP1 PE=1 SV=1	1	6	6	6	25.7	39.221	749630	323210	2.31933
P57772	Selenocysteine-specific elongation factor	EEFSEC	FUNCTION: Translation factor necessary for the incorporation of selenocysteine into proteins. It probably replaces EF-Tu for the insertion of selenocysteine directed by the UGA codon. SelB binds GTP and GDP.	sp|P57772|SELB_HUMAN	sp|P57772|SELB_HUMAN Selenocysteine-specific elongation factor OS=Homo sapiens OX=9606 GN=EEFSEC PE=1 SV=4	1	11	11	11	29.4	65.304	641760	276750	2.31892
Q5T200	Zinc finger CCCH domain-containing protein 13	ZC3H13	FUNCTION: Associated component of the WMM complex, a complex that mediates N6-methyladenosine (m6A) methylation of RNAs, a modification that plays a role in the efficiency of mRNA splicing and RNA processing (PubMed:29507755). Acts as a key regulator of m6A methylation by promoting m6A methylation of mRNAs at the 3'-UTR (By similarity). Controls embryonic stem cells (ESCs) pluripotency via its ro…	sp|Q5T200|ZC3HD_HUMAN	sp|Q5T200|ZC3HD_HUMAN Zinc finger CCCH domain-containing protein 13 OS=Homo sapiens OX=9606 GN=ZC3H13 PE=1 SV=1	1	8	8	8	5.5	196.63	506400	218470	2.31794
P48382	DNA-binding protein RFX5	RFX5	FUNCTION: Activates transcription from class II MHC promoters. Recognizes X-boxes. Mediates cooperative binding between RFX and NF-Y. RFX binds the X1 box of MHC-II promoters.	sp|P48382|RFX5_HUMAN	sp|P48382|RFX5_HUMAN DNA-binding protein RFX5 OS=Homo sapiens OX=9606 GN=RFX5 PE=1 SV=1	1	3	3	3	8	65.322	137350	59260	2.31775
Q8IV36	Protein HID1	HID1	FUNCTION: May play an important role in the development of cancers in a broad range of tissues. {ECO:0000269|PubMed:11281419}.	sp|Q8IV36|HID1_HUMAN	sp|Q8IV36|HID1_HUMAN Protein HID1 OS=Homo sapiens OX=9606 GN=HID1 PE=1 SV=1	1	3	3	3	6.9	88.743	111510	48125	2.31709
Q9UL15	BAG family molecular chaperone regulator 5	BAG5	FUNCTION: Inhibits both auto-ubiquitination of PRKN and ubiquitination of target proteins by PRKN (By similarity). May function as a nucleotide exchange factor for HSP/HSP70, promoting ADP release, and activating Hsp70-mediated refolding. {ECO:0000250, ECO:0000269|PubMed:20223214}.	sp|Q9UL15|BAG5_HUMAN	sp|Q9UL15|BAG5_HUMAN BAG family molecular chaperone regulator 5 OS=Homo sapiens OX=9606 GN=BAG5 PE=1 SV=1	1	3	3	3	7.8	51.199	148240	64213	2.30857
P83111	Serine beta-lactamase-like protein LACTB, mitochondrial	LACTB	FUNCTION: Mitochondrial serine protease that acts as a regulator of mitochondrial lipid metabolism (PubMed:28329758). Acts by decreasing protein levels of PISD, a mitochondrial enzyme that converts phosphatidylserine (PtdSer) to phosphatidylethanolamine (PtdEtn), thereby affecting mitochondrial lipid metabolism (PubMed:28329758). It is unclear whether it acts directly by mediating proteolysis of …	sp|P83111|LACTB_HUMAN	sp|P83111|LACTB_HUMAN Serine beta-lactamase-like protein LACTB, mitochondrial OS=Homo sapiens OX=9606 GN=LACTB PE=1 SV=2	1	5	5	5	15.4	60.693	247200	107290	2.30404
P52701	DNA mismatch repair protein Msh6	MSH6	FUNCTION: Component of the post-replicative DNA mismatch repair system (MMR). Heterodimerizes with MSH2 to form MutS alpha, which binds to DNA mismatches thereby initiating DNA repair. When bound, MutS alpha bends the DNA helix and shields approximately 20 base pairs, and recognizes single base mismatches and dinucleotide insertion-deletion loops (IDL) in the DNA. After mismatch binding, forms a …	sp|P52701|MSH6_HUMAN	sp|P52701|MSH6_HUMAN DNA mismatch repair protein Msh6 OS=Homo sapiens OX=9606 GN=MSH6 PE=1 SV=2	1	24	24	24	26.1	152.78	6654600	2895400	2.29834
Q7Z7B1	Phosphatidylinositol-glycan biosynthesis class W protein	PIGW	FUNCTION: Required for the transport of GPI-anchored proteins to the plasma membrane (PubMed:24367057). Probable acetyltransferase, which acetylates the inositol ring of phosphatidylinositol during biosynthesis of GPI-anchor. Acetylation during GPI-anchor biosynthesis is not essential for the subsequent mannosylation and is usually removed soon after the attachment of GPIs to proteins (By similar…	sp|Q7Z7B1|PIGW_HUMAN	sp|Q7Z7B1|PIGW_HUMAN Phosphatidylinositol-glycan biosynthesis class W protein OS=Homo sapiens OX=9606 GN=PIGW PE=1 SV=1	1	1	1	1	2.2	56.881	417200	182150	2.29042
Q9NRY5	Protein FAM114A2	FAM114A2		sp|Q9NRY5|F1142_HUMAN	sp|Q9NRY5|F1142_HUMAN Protein FAM114A2 OS=Homo sapiens OX=9606 GN=FAM114A2 PE=1 SV=4	1	9	9	9	24.4	55.468	1010200	441740	2.28687
Q6UX04	Spliceosome-associated protein CWC27 homolog	CWC27	FUNCTION: As part of the spliceosome, plays a role in pre-mRNA splicing (PubMed:29360106). Probable inactive PPIase with no peptidyl-prolyl cis-trans isomerase activity (PubMed:20676357). {ECO:0000269|PubMed:20676357, ECO:0000269|PubMed:29360106}.	sp|Q6UX04|CWC27_HUMAN	sp|Q6UX04|CWC27_HUMAN Spliceosome-associated protein CWC27 homolog OS=Homo sapiens OX=9606 GN=CWC27 PE=1 SV=1	1	5	5	5	19.1	53.846	563310	246670	2.28366
Q9BW19	Kinesin-like protein KIFC1	KIFC1	FUNCTION: Minus end-directed microtubule-dependent motor required for bipolar spindle formation (PubMed:15843429). May contribute to movement of early endocytic vesicles (By similarity). Regulates cilium formation and structure (By similarity). {ECO:0000250|UniProtKB:Q9QWT9, ECO:0000269|PubMed:15843429}.	sp|Q9BW19|KIFC1_HUMAN	sp|Q9BW19|KIFC1_HUMAN Kinesin-like protein KIFC1 OS=Homo sapiens OX=9606 GN=KIFC1 PE=1 SV=2	1	16	16	16	33.6	73.747	2520600	1107600	2.27573
Q9UJY4	ADP-ribosylation factor-binding protein GGA2	GGA2	FUNCTION: Plays a role in protein sorting and trafficking between the trans-Golgi network (TGN) and endosomes. Mediates the ARF-dependent recruitment of clathrin to the TGN and binds ubiquitinated proteins and membrane cargo molecules with a cytosolic acidic cluster-dileucine (DXXLL) motif (PubMed:10747088). Mediates export of the GPCR receptor ADRA2B to the cell surface (PubMed:27901063). Regula…	sp|Q9UJY4|GGA2_HUMAN	sp|Q9UJY4|GGA2_HUMAN ADP-ribosylation factor-binding protein GGA2 OS=Homo sapiens OX=9606 GN=GGA2 PE=1 SV=3	1	3	3	3	10.9	67.15	78139	34355	2.27446
Q9BRJ7	Tudor-interacting repair regulator protein	NUDT16L1	FUNCTION: Key regulator of TP53BP1 required to stabilize TP53BP1 and regulate its recruitment to chromatin (PubMed:28241136). In absence of DNA damage, interacts with the tandem Tudor-like domain of TP53BP1, masking the region that binds histone H4 dimethylated at 'Lys-20' (H4K20me2), thereby preventing TP53BP1 recruitment to chromatin and maintaining TP53BP1 localization to the nucleus (PubMed:2…	sp|Q9BRJ7|TIRR_HUMAN	sp|Q9BRJ7|TIRR_HUMAN Tudor-interacting repair regulator protein OS=Homo sapiens OX=9606 GN=NUDT16L1 PE=1 SV=1	1	4	4	4	26.1	23.338	234320	103030	2.27429
Q9UHA4	Ragulator complex protein LAMTOR3	LAMTOR3	FUNCTION: As part of the Ragulator complex it is involved in amino acid sensing and activation of mTORC1, a signaling complex promoting cell growth in response to growth factors, energy levels, and amino acids. Activated by amino acids through a mechanism involving the lysosomal V-ATPase, the Ragulator functions as a guanine nucleotide exchange factor activating the small GTPases Rag. Activated R…	sp|Q9UHA4|LTOR3_HUMAN	sp|Q9UHA4|LTOR3_HUMAN Ragulator complex protein LAMTOR3 OS=Homo sapiens OX=9606 GN=LAMTOR3 PE=1 SV=1	1	4	4	4	49.2	13.623	1503100	661290	2.27298
O94804	Serine/threonine-protein kinase 10	STK10	FUNCTION: Serine/threonine-protein kinase involved in regulation of lymphocyte migration. Phosphorylates MSN, and possibly PLK1. Involved in regulation of lymphocyte migration by mediating phosphorylation of ERM proteins such as MSN. Acts as a negative regulator of MAP3K1/MEKK1. May also act as a cell cycle regulator by acting as a polo kinase kinase: mediates phosphorylation of PLK1 in vitro; ho…	sp|O94804|STK10_HUMAN	sp|O94804|STK10_HUMAN Serine/threonine-protein kinase 10 OS=Homo sapiens OX=9606 GN=STK10 PE=1 SV=1	1	3	3	3	3.9	112.13	122920	54097	2.27221
Q8N9T8	Protein KRI1 homolog	KRI1		sp|Q8N9T8|KRI1_HUMAN	sp|Q8N9T8|KRI1_HUMAN Protein KRI1 homolog OS=Homo sapiens OX=9606 GN=KRI1 PE=1 SV=3	1	3	3	3	6.3	82.597	189080	83271	2.27066
P23526	Adenosylhomocysteinase	AHCY	FUNCTION: Adenosylhomocysteine is a competitive inhibitor of S-adenosyl-L-methionine-dependent methyl transferase reactions; therefore adenosylhomocysteinase may play a key role in the control of methylations via regulation of the intracellular concentration of adenosylhomocysteine. {ECO:0000269|PubMed:12590576}.	sp|P23526|SAHH_HUMAN	sp|P23526|SAHH_HUMAN Adenosylhomocysteinase OS=Homo sapiens OX=9606 GN=AHCY PE=1 SV=4	1	16	16	16	40.7	47.716	25149000	11084000	2.26895
P13611	Versican core protein	VCAN	FUNCTION: May play a role in intercellular signaling and in connecting cells with the extracellular matrix. May take part in the regulation of cell motility, growth and differentiation. Binds hyaluronic acid.	sp|P13611|CSPG2_HUMAN	sp|P13611|CSPG2_HUMAN Versican core protein OS=Homo sapiens OX=9606 GN=VCAN PE=1 SV=3	1	3	3	3	1.2	372.82	1596000	703600	2.26833
Q99640	Membrane-associated tyrosine- and threonine-specific cdc2-inhibitory kinase	PKMYT1	FUNCTION: Acts as a negative regulator of entry into mitosis (G2 to M transition) by phosphorylation of the CDK1 kinase specifically when CDK1 is complexed to cyclins. Mediates phosphorylation of CDK1 predominantly on 'Thr-14'. Also involved in Golgi fragmentation. May be involved in phosphorylation of CDK1 on 'Tyr-15' to a lesser degree, however tyrosine kinase activity is unclear and may be ind…	sp|Q99640|PMYT1_HUMAN	sp|Q99640|PMYT1_HUMAN Membrane-associated tyrosine- and threonine-specific cdc2-inhibitory kinase OS=Homo sapiens OX=9606 GN=PKMYT1 PE=1 SV=1	1	5	5	5	13.8	54.521	457860	201940	2.26731
P78316	Nucleolar protein 14	NOP14	FUNCTION: Involved in nucleolar processing of pre-18S ribosomal RNA. Has a role in the nuclear export of 40S pre-ribosomal subunit to the cytoplasm (By similarity). {ECO:0000250}.	sp|P78316|NOP14_HUMAN	sp|P78316|NOP14_HUMAN Nucleolar protein 14 OS=Homo sapiens OX=9606 GN=NOP14 PE=1 SV=3	1	2	2	2	3.3	97.667	86107	38010	2.26538
P35237	Serpin B6	SERPINB6	FUNCTION: May be involved in the regulation of serine proteinases present in the brain or extravasated from the blood (By similarity). Inhibitor of cathepsin G, kallikrein-8 and thrombin. May play an important role in the inner ear in the protection against leakage of lysosomal content during stress and loss of this protection results in cell death and sensorineural hearing loss. {ECO:0000250, EC…	sp|P35237|SPB6_HUMAN	sp|P35237|SPB6_HUMAN Serpin B6 OS=Homo sapiens OX=9606 GN=SERPINB6 PE=1 SV=3	1	15	15	14	49.5	42.621	12272000	5417500	2.26525
O75340	Programmed cell death protein 6	PDCD6	FUNCTION: Calcium sensor that plays a key role in processes such as endoplasmic reticulum (ER)-Golgi vesicular transport, endosomal biogenesis or membrane repair. Acts as an adapter that bridges unrelated proteins or stabilizes weak protein-protein complexes in response to calcium: calcium-binding triggers exposure of apolar surface, promoting interaction with different sets of proteins thanks to…	sp|O75340|PDCD6_HUMAN	sp|O75340|PDCD6_HUMAN Programmed cell death protein 6 OS=Homo sapiens OX=9606 GN=PDCD6 PE=1 SV=1	1	5	5	5	25.1	21.868	4730500	2092500	2.26069
P62081	40S ribosomal protein S7	RPS7	FUNCTION: Required for rRNA maturation. {ECO:0000269|PubMed:19061985}.	sp|P62081|RS7_HUMAN	sp|P62081|RS7_HUMAN 40S ribosomal protein S7 OS=Homo sapiens OX=9606 GN=RPS7 PE=1 SV=1	1	5	5	5	25.8	22.127	1824200	810790	2.2499
P42696	RNA-binding protein 34	RBM34		sp|P42696|RBM34_HUMAN	sp|P42696|RBM34_HUMAN RNA-binding protein 34 OS=Homo sapiens OX=9606 GN=RBM34 PE=1 SV=2	1	4	4	4	10.9	48.564	188270	83701	2.24932
Q9NR31	GTP-binding protein SAR1a	SAR1A	FUNCTION: Involved in transport from the endoplasmic reticulum to the Golgi apparatus (By similarity). Required to maintain SEC16A localization at discrete locations on the ER membrane perhaps by preventing its dissociation. SAR1A-GTP-dependent assembly of SEC16A on the ER membrane forms an organized scaffold defining endoplasmic reticulum exit sites (ERES). {ECO:0000250, ECO:0000269|PubMed:17005…	sp|Q9NR31|SAR1A_HUMAN	sp|Q9NR31|SAR1A_HUMAN GTP-binding protein SAR1a OS=Homo sapiens OX=9606 GN=SAR1A PE=1 SV=1	1	6	6	3	39.4	22.367	3852600	1724200	2.23443
Q9HCM4	Band 4.1-like protein 5	EPB41L5	FUNCTION: May contribute to the correct positioning of tight junctions during the establishment of polarity in epithelial cells. {ECO:0000269|PubMed:17920587}.	sp|Q9HCM4|E41L5_HUMAN	sp|Q9HCM4|E41L5_HUMAN Band 4.1-like protein 5 OS=Homo sapiens OX=9606 GN=EPB41L5 PE=1 SV=3	1	11	11	10	24.1	81.855	1907700	854050	2.23371
P54652	Heat shock-related 70 kDa protein 2	HSPA2	FUNCTION: Molecular chaperone implicated in a wide variety of cellular processes, including protection of the proteome from stress, folding and transport of newly synthesized polypeptides, activation of proteolysis of misfolded proteins and the formation and dissociation of protein complexes. Plays a pivotal role in the protein quality control system, ensuring the correct folding of proteins, the…	sp|P54652|HSP72_HUMAN	sp|P54652|HSP72_HUMAN Heat shock-related 70 kDa protein 2 OS=Homo sapiens OX=9606 GN=HSPA2 PE=1 SV=1	1	22	10	10	39.9	70.02	1532900	687220	2.23058
Q8IXK0	Polyhomeotic-like protein 2	PHC2	FUNCTION: Component of a Polycomb group (PcG) multiprotein PRC1-like complex, a complex class required to maintain the transcriptionally repressive state of many genes, including Hox genes, throughout development. PcG PRC1 complex acts via chromatin remodeling and modification of histones; it mediates monoubiquitination of histone H2A 'Lys-119', rendering chromatin heritably changed in its expres…	sp|Q8IXK0|PHC2_HUMAN	sp|Q8IXK0|PHC2_HUMAN Polyhomeotic-like protein 2 OS=Homo sapiens OX=9606 GN=PHC2 PE=1 SV=1	1	2	2	2	3	90.712	92625	41577	2.22779
Q96PM9	Zinc finger protein 385A	ZNF385A	FUNCTION: RNA-binding protein that affects the localization and the translation of a subset of mRNA. May play a role in adipogenesis through binding to the 3'-UTR of CEBPA mRNA and regulation of its translation. Targets ITPR1 mRNA to dendrites in Purkinje cells, and may regulate its activity-dependent translation. With ELAVL1, binds the 3'-UTR of p53/TP53 mRNAs to control their nuclear export ind…	sp|Q96PM9|Z385A_HUMAN	sp|Q96PM9|Z385A_HUMAN Zinc finger protein 385A OS=Homo sapiens OX=9606 GN=ZNF385A PE=1 SV=2	1	2	2	2	6.7	40.453	121130	54484	2.22322
Q5SGD2	Protein phosphatase 1L	PPM1L	FUNCTION: Acts as a suppressor of the SAPK signaling pathways by associating with and dephosphorylating MAP3K7/TAK1 and MAP3K5, and by attenuating the association between MAP3K7/TAK1 and MAP2K4 or MAP2K6. {ECO:0000269|PubMed:17456047}.	sp|Q5SGD2|PPM1L_HUMAN	sp|Q5SGD2|PPM1L_HUMAN Protein phosphatase 1L OS=Homo sapiens OX=9606 GN=PPM1L PE=1 SV=1	1	4	4	4	17.8	41.053	203440	91583	2.22137
Q01658	Protein Dr1	DR1	FUNCTION: The association of the DR1/DRAP1 heterodimer with TBP results in a functional repression of both activated and basal transcription of class II genes. This interaction precludes the formation of a transcription-competent complex by inhibiting the association of TFIIA and/or TFIIB with TBP. Can bind to DNA on its own. Component of the ATAC complex, a complex with histone acetyltransferase…	sp|Q01658|NC2B_HUMAN	sp|Q01658|NC2B_HUMAN Protein Dr1 OS=Homo sapiens OX=9606 GN=DR1 PE=1 SV=1	1	1	1	1	7.4	19.443	575060	258990	2.22039
Q9HD47	Ran guanine nucleotide release factor	RANGRF	FUNCTION: May regulate the intracellular trafficking of RAN (PubMed:11290418). Promotes guanine nucleotide release from RAN and inhibits binding of new GTP by preventing the binding of the RAN guanine nucleotide exchange factor RCC1 (PubMed:29040603). Regulates the levels of GTP-bound RAN in the nucleus, and thereby plays a role in the regulation of RAN-dependent mitotic spindle dynamics (PubMed:…	sp|Q9HD47|MOG1_HUMAN	sp|Q9HD47|MOG1_HUMAN Ran guanine nucleotide release factor OS=Homo sapiens OX=9606 GN=RANGRF PE=1 SV=1	1	1	1	1	9.7	20.448	67429	30377	2.21974
Q9NZW5	Protein PALS2	PALS2		sp|Q9NZW5|PALS2_HUMAN	sp|Q9NZW5|PALS2_HUMAN Protein PALS2 OS=Homo sapiens OX=9606 GN=PALS2 PE=1 SV=2	1	14	14	14	34.8	61.116	4657300	2100500	2.21723
P61803	Dolichyl-diphosphooligosaccharide--protein glycosyltransferase subunit DAD1	DAD1	FUNCTION: Subunit of the oligosaccharyl transferase (OST) complex that catalyzes the initial transfer of a defined glycan (Glc(3)Man(9)GlcNAc(2) in eukaryotes) from the lipid carrier dolichol-pyrophosphate to an asparagine residue within an Asn-X-Ser/Thr consensus motif in nascent polypeptide chains, the first step in protein N-glycosylation (PubMed:22467853). N-glycosylation occurs cotranslation…	sp|P61803|DAD1_HUMAN	sp|P61803|DAD1_HUMAN Dolichyl-diphosphooligosaccharide--protein glycosyltransferase subunit DAD1 OS=Homo sapiens OX=9606 GN=DAD1 PE=1 SV=3	1	4	4	4	35.4	12.497	2991200	1349300	2.21685
Q15004	PCNA-associated factor	PCLAF	FUNCTION: PCNA-binding protein that acts as a regulator of DNA repair during DNA replication. Following DNA damage, the interaction with PCNA is disrupted, facilitating the interaction between monoubiquitinated PCNA and the translesion DNA synthesis DNA polymerase eta (POLH) at stalled replisomes, facilitating the bypass of replication-fork-blocking lesions. Also acts as a regulator of centrosome…	sp|Q15004|PAF15_HUMAN	sp|Q15004|PAF15_HUMAN PCNA-associated factor OS=Homo sapiens OX=9606 GN=PCLAF PE=1 SV=1	1	1	1	1	15.3	11.986	108870	49134	2.21578
Q9ULX3	RNA-binding protein NOB1	NOB1	FUNCTION: May play a role in mRNA degradation (Probable). Endonuclease required for processing of 20S pre-rRNA precursor and biogenesis of 40S ribosomal subunits (By similarity). {ECO:0000250|UniProtKB:Q9FLL1, ECO:0000305}.	sp|Q9ULX3|NOB1_HUMAN	sp|Q9ULX3|NOB1_HUMAN RNA-binding protein NOB1 OS=Homo sapiens OX=9606 GN=NOB1 PE=1 SV=1	1	3	3	3	10	46.674	301150	136170	2.21157
Q15517	Corneodesmosin	CDSN	FUNCTION: Important for the epidermal barrier integrity. {ECO:0000269|PubMed:20691404}.	sp|Q15517|CDSN_HUMAN	sp|Q15517|CDSN_HUMAN Corneodesmosin OS=Homo sapiens OX=9606 GN=CDSN PE=1 SV=3	1	4	4	4	17.2	51.522	58563	26512	2.20892
Q07954	Prolow-density lipoprotein receptor-related protein 1	LRP1	FUNCTION: Endocytic receptor involved in endocytosis and in phagocytosis of apoptotic cells. Required for early embryonic development. Involved in cellular lipid homeostasis. Involved in the plasma clearance of chylomicron remnants and activated LRPAP1 (alpha 2-macroglobulin), as well as the local metabolism of complexes between plasminogen activators and their endogenous inhibitors. May modulate…	sp|Q07954|LRP1_HUMAN	sp|Q07954|LRP1_HUMAN Prolow-density lipoprotein receptor-related protein 1 OS=Homo sapiens OX=9606 GN=LRP1 PE=1 SV=2	1	33	33	33	11.3	504.6	2383100	1081500	2.20351
Q13136	Liprin-alpha-1	PPFIA1	FUNCTION: May regulate the disassembly of focal adhesions. May localize receptor-like tyrosine phosphatases type 2A at specific sites on the plasma membrane, possibly regulating their interaction with the extracellular environment and their association with substrates. {ECO:0000269|PubMed:7796809}.	sp|Q13136|LIPA1_HUMAN;sp|O75334|LIPA2_HUMAN;sp|O75335|LIPA4_HUMAN;sp|O75145|LIPA3_HUMAN	sp|Q13136|LIPA1_HUMAN Liprin-alpha-1 OS=Homo sapiens OX=9606 GN=PPFIA1 PE=1 SV=1	4	18	18	18	23.5	135.78	5661700	2573700	2.19983
O95562	Vesicle transport protein SFT2B	SFT2D2	FUNCTION: May be involved in fusion of retrograde transport vesicles derived from an endocytic compartment with the Golgi complex. {ECO:0000250|UniProtKB:P38166}.	sp|O95562|SFT2B_HUMAN	sp|O95562|SFT2B_HUMAN Vesicle transport protein SFT2B OS=Homo sapiens OX=9606 GN=SFT2D2 PE=1 SV=1	1	2	2	2	16.9	17.779	201410	91923	2.19107
P08621	U1 small nuclear ribonucleoprotein 70 kDa	SNRNP70	FUNCTION: Component of the spliceosomal U1 snRNP, which is essential for recognition of the pre-mRNA 5' splice-site and the subsequent assembly of the spliceosome (PubMed:19325628, PubMed:25555158). SNRNP70 binds to the loop I region of U1-snRNA (PubMed:2467746, PubMed:19325628, PubMed:25555158). {ECO:0000269|PubMed:19325628, ECO:0000269|PubMed:2467746, ECO:0000269|PubMed:25555158}.; FUNCTION: [I…	sp|P08621|RU17_HUMAN	sp|P08621|RU17_HUMAN U1 small nuclear ribonucleoprotein 70 kDa OS=Homo sapiens OX=9606 GN=SNRNP70 PE=1 SV=2	1	14	14	14	33.4	51.556	11453000	5228700	2.19041
Q8NEB9	Phosphatidylinositol 3-kinase catalytic subunit type 3	PIK3C3	FUNCTION: Catalytic subunit of the PI3K complex that mediates formation of phosphatidylinositol 3-phosphate; different complex forms are believed to play a role in multiple membrane trafficking pathways: PI3KC3-C1 is involved in initiation of autophagosomes and PI3KC3-C2 in maturation of autophagosomes and endocytosis. Involved in regulation of degradative endocytic trafficking and required for t…	sp|Q8NEB9|PK3C3_HUMAN	sp|Q8NEB9|PK3C3_HUMAN Phosphatidylinositol 3-kinase catalytic subunit type 3 OS=Homo sapiens OX=9606 GN=PIK3C3 PE=1 SV=1	1	6	6	6	9.1	101.55	426430	194840	2.18862
Q9GZU7	Carboxy-terminal domain RNA polymerase II polypeptide A small phosphatase 1	CTDSP1	FUNCTION: Preferentially catalyzes the dephosphorylation of 'Ser-5' within the tandem 7 residue repeats in the C-terminal domain (CTD) of the largest RNA polymerase II subunit POLR2A. Negatively regulates RNA polymerase II transcription, possibly by controlling the transition from initiation/capping to processive transcript elongation. Recruited by REST to neuronal genes that contain RE-1 element…	sp|Q9GZU7|CTDS1_HUMAN;sp|O15194|CTDSL_HUMAN	sp|Q9GZU7|CTDS1_HUMAN Carboxy-terminal domain RNA polymerase II polypeptide A small phosphatase 1 OS=Homo sapiens OX=9606 GN=CTDSP1 PE=1 SV=1;sp|O15194|CTDSL_HUMAN CTD small phosphatase-like protein OS=Homo sapiens OX=9606 GN=CTDSPL PE=1 SV=2	2	2	2	2	8	29.203	94422	43149	2.18828
Q9UL63	Muskelin	MKLN1	FUNCTION: Component of the CTLH E3 ubiquitin-protein ligase complex that selectively accepts ubiquitin from UBE2H and mediates ubiquitination and subsequent proteasomal degradation of the transcription factor HBP1 (PubMed:29911972). Required for internalization of the GABA receptor GABRA1 from the cell membrane via endosomes and subsequent GABRA1 degradation (By similarity). Acts as a mediator of…	sp|Q9UL63|MKLN1_HUMAN	sp|Q9UL63|MKLN1_HUMAN Muskelin OS=Homo sapiens OX=9606 GN=MKLN1 PE=1 SV=2	1	6	6	6	11.7	84.767	87698	40078	2.18818
P29122	Proprotein convertase subtilisin/kexin type 6	PCSK6	FUNCTION: Serine endoprotease that processes various proproteins by cleavage at paired basic amino acids, recognizing the RXXX[KR]R consensus motif. Likely functions in the constitutive secretory pathway, with unique restricted distribution in both neuroendocrine and non-neuroendocrine tissues.	sp|P29122|PCSK6_HUMAN	sp|P29122|PCSK6_HUMAN Proprotein convertase subtilisin/kexin type 6 OS=Homo sapiens OX=9606 GN=PCSK6 PE=1 SV=1	1	2	2	2	2.5	106.42	39119	17887	2.18701
Q99538	Legumain	LGMN	FUNCTION: Has a strict specificity for hydrolysis of asparaginyl bonds. Can also cleave aspartyl bonds slowly, especially under acidic conditions. Required for normal lysosomal protein degradation in renal proximal tubules. Required for normal degradation of internalized EGFR. Plays a role in the regulation of cell proliferation via its role in EGFR degradation (By similarity). May be involved in…	sp|Q99538|LGMN_HUMAN	sp|Q99538|LGMN_HUMAN Legumain OS=Homo sapiens OX=9606 GN=LGMN PE=1 SV=1	1	4	4	4	14.8	49.411	1353400	619840	2.18347
Q49A26	Cytokine-like nuclear factor N-PAC	GLYR1	FUNCTION: Nucleosome-destabilizing factor that is recruited to genes during transcriptional activation (PubMed:29759984). Facilitates Pol II transcription through nucleosomes (PubMed:29759984). Binds DNA (in vitro) (PubMed:29759984). Recognizes and binds trimethylated 'Lys-36' of histone H3 (H3K36me3) (PubMed:20850016). Promotes KDM1B demethylase activity (PubMed:23260659). Stimulates the acetyla…	sp|Q49A26|GLYR1_HUMAN	sp|Q49A26|GLYR1_HUMAN Cytokine-like nuclear factor N-PAC OS=Homo sapiens OX=9606 GN=GLYR1 PE=1 SV=4	1	6	6	6	18.3	60.547	667890	306770	2.17717
Q01968	Inositol polyphosphate 5-phosphatase OCRL	OCRL	FUNCTION: Catalyzes the hydrolysis of the 4-position phosphate of phosphatidylinositol 4,5-bisphosphate (PtdIns(4,5)P2) and phosphatidylinositol-3,4,5-bisphosphate (PtdIns(3,4,5)P3), with the greatest catalytic activity towards PtdIns(4,5)P2 (PubMed:7761412, PubMed:15474001, PubMed:9430698, PubMed:10764818). Able also to hydrolyzes the 4-phosphate of inositol 1,4,5-trisphosphate and of inositol 1…	sp|Q01968|OCRL_HUMAN	sp|Q01968|OCRL_HUMAN Inositol polyphosphate 5-phosphatase OCRL OS=Homo sapiens OX=9606 GN=OCRL PE=1 SV=3	1	11	11	11	17.2	104.2	1146400	527320	2.17401
Q9NQ55	Suppressor of SWI4 1 homolog	PPAN	FUNCTION: May have a role in cell growth.	sp|Q9NQ55|SSF1_HUMAN	sp|Q9NQ55|SSF1_HUMAN Suppressor of SWI4 1 homolog OS=Homo sapiens OX=9606 GN=PPAN PE=2 SV=1	1	2	2	2	5.5	53.193	56896	26224	2.16962
Q5XUX1	F-box/WD repeat-containing protein 9	FBXW9	FUNCTION: Substrate-recognition component of the SCF (SKP1-CUL1-F-box protein)-type E3 ubiquitin ligase complex. {ECO:0000250}.	sp|Q5XUX1|FBXW9_HUMAN	sp|Q5XUX1|FBXW9_HUMAN F-box/WD repeat-containing protein 9 OS=Homo sapiens OX=9606 GN=FBXW9 PE=1 SV=3	1	5	5	5	18.6	50.76	382070	176160	2.16888
P52434	DNA-directed RNA polymerases I, II, and III subunit RPABC3	POLR2H	FUNCTION: DNA-dependent RNA polymerase catalyzes the transcription of DNA into RNA using the four ribonucleoside triphosphates as substrates. Common component of RNA polymerases I, II and III which synthesize ribosomal RNA precursors, mRNA precursors and many functional non-coding RNAs, and small RNAs, such as 5S rRNA and tRNAs, respectively. {ECO:0000269|PubMed:9852112}.	sp|P52434|RPAB3_HUMAN	sp|P52434|RPAB3_HUMAN DNA-directed RNA polymerases I, II, and III subunit RPABC3 OS=Homo sapiens OX=9606 GN=POLR2H PE=1 SV=4	1	4	4	4	33.3	17.143	706730	325910	2.16848
Q92930	Ras-related protein Rab-8B	RAB8B	FUNCTION: The small GTPases Rab are key regulators of intracellular membrane trafficking, from the formation of transport vesicles to their fusion with membranes. Rabs cycle between an inactive GDP-bound form and an active GTP-bound form that is able to recruit to membranes different sets of downstream effectors directly responsible for vesicle formation, movement, tethering and fusion. That Rab …	sp|Q92930|RAB8B_HUMAN	sp|Q92930|RAB8B_HUMAN Ras-related protein Rab-8B OS=Homo sapiens OX=9606 GN=RAB8B PE=1 SV=2	1	4	3	3	24.6	23.584	437820	202420	2.16293
Q7Z4G4	tRNA (guanine(10)-N2)-methyltransferase homolog	TRMT11	FUNCTION: Catalytic subunit of an S-adenosyl-L-methionine-dependent tRNA methyltransferase complex that mediates the methylation of the guanosine nucleotide at position 10 (m2G10) in tRNAs. {ECO:0000250}.	sp|Q7Z4G4|TRM11_HUMAN	sp|Q7Z4G4|TRM11_HUMAN tRNA (guanine(10)-N2)-methyltransferase homolog OS=Homo sapiens OX=9606 GN=TRMT11 PE=1 SV=1	1	4	4	4	14.3	53.42	123150	56958	2.16212
Q8NCM8	Cytoplasmic dynein 2 heavy chain 1	DYNC2H1	FUNCTION: May function as a motor for intraflagellar retrograde transport. Functions in cilia biogenesis. May play a role in transport between endoplasmic reticulum and Golgi or organization of the Golgi in cells (By similarity). {ECO:0000250}.	sp|Q8NCM8|DYHC2_HUMAN	sp|Q8NCM8|DYHC2_HUMAN Cytoplasmic dynein 2 heavy chain 1 OS=Homo sapiens OX=9606 GN=DYNC2H1 PE=1 SV=4	1	8	8	8	2.5	492.62	269560	124800	2.15994
Q9UBC2	Epidermal growth factor receptor substrate 15-like 1	EPS15L1	FUNCTION: Seems to be a constitutive component of clathrin-coated pits that is required for receptor-mediated endocytosis. Involved in endocytosis of integrin beta-1 (ITGB1) and transferrin receptor (TFR); internalization of ITGB1 as DAB2-dependent cargo but not TFR seems to require association with DAB2. {ECO:0000269|PubMed:22648170, ECO:0000269|PubMed:9407958}.	sp|Q9UBC2|EP15R_HUMAN	sp|Q9UBC2|EP15R_HUMAN Epidermal growth factor receptor substrate 15-like 1 OS=Homo sapiens OX=9606 GN=EPS15L1 PE=1 SV=1	1	18	18	18	33.8	94.254	3244000	1501900	2.15993
P35556	Fibrillin-2	FBN2	FUNCTION: [Fibrillin-2]: Fibrillins are structural components of 10-12 nm extracellular calcium-binding microfibrils, which occur either in association with elastin or in elastin-free bundles. Fibrillin-2-containing microfibrils regulate the early process of elastic fiber assembly. Regulates osteoblast maturation by controlling TGF-beta bioavailability and calibrating TGF-beta and BMP levels, res…	sp|P35556|FBN2_HUMAN;sp|Q75N90|FBN3_HUMAN	sp|P35556|FBN2_HUMAN Fibrillin-2 OS=Homo sapiens OX=9606 GN=FBN2 PE=1 SV=3	2	7	7	7	3.1	314.77	187640	87136	2.15342
Q9BV57	Acireductone dioxygenase	ADI1	FUNCTION: Catalyzes the formation of formate and 2-keto-4-methylthiobutyrate (KMTB) from 1,2-dihydroxy-3-keto-5-methylthiopentene (DHK-MTPene). Also down-regulates cell migration mediated by MMP14. Necessary for hepatitis C virus replication in an otherwise non-permissive cell line. {ECO:0000255|HAMAP-Rule:MF_03154, ECO:0000269|PubMed:11602742, ECO:0000269|PubMed:15938715}.	sp|Q9BV57|MTND_HUMAN	sp|Q9BV57|MTND_HUMAN Acireductone dioxygenase OS=Homo sapiens OX=9606 GN=ADI1 PE=1 SV=1	1	6	6	6	49.2	21.498	890130	413940	2.15038
O94762	ATP-dependent DNA helicase Q5	RECQL5	FUNCTION: Isoform beta is a DNA helicase that plays an important role in DNA replication, transcription and repair. Inhibits elongation of stalled transcripts at DNA damage sites by binding to the RNA polymerase II subunit POLR2A and blocking the TCEA1 binding site. Required for mitotic chromosome separation after cross-over events and cell cycle progress. Required for efficient DNA repair, inclu…	sp|O94762|RECQ5_HUMAN	sp|O94762|RECQ5_HUMAN ATP-dependent DNA helicase Q5 OS=Homo sapiens OX=9606 GN=RECQL5 PE=1 SV=2	1	3	3	3	3.4	108.86	102850	47843	2.14974
Q9Y3Q0	N-acetylated-alpha-linked acidic dipeptidase 2	NAALAD2	FUNCTION: Has N-acetylated-alpha-linked-acidic dipeptidase (NAALADase) activity. Also exhibits a dipeptidyl-peptidase IV type activity. Inactivates the peptide neurotransmitter N-acetylaspartylglutamate. {ECO:0000269|PubMed:10085079}.	sp|Q9Y3Q0|NALD2_HUMAN	sp|Q9Y3Q0|NALD2_HUMAN N-acetylated-alpha-linked acidic dipeptidase 2 OS=Homo sapiens OX=9606 GN=NAALAD2 PE=1 SV=1	1	1	1	1	2.2	83.59	35578	16570	2.14713
Q9UNM6	26S proteasome non-ATPase regulatory subunit 13	PSMD13	FUNCTION: Component of the 26S proteasome, a multiprotein complex involved in the ATP-dependent degradation of ubiquitinated proteins. This complex plays a key role in the maintenance of protein homeostasis by removing misfolded or damaged proteins, which could impair cellular functions, and by removing proteins whose functions are no longer required. Therefore, the proteasome participates in num…	sp|Q9UNM6|PSD13_HUMAN	sp|Q9UNM6|PSD13_HUMAN 26S proteasome non-ATPase regulatory subunit 13 OS=Homo sapiens OX=9606 GN=PSMD13 PE=1 SV=2	1	15	15	15	47.3	42.945	8698700	4054400	2.1455
Q14966	Zinc finger protein 638	ZNF638	FUNCTION: Transcription factor that binds to cytidine clusters in double-stranded DNA (PubMed:8647861, PubMed:30487602). Plays a key role in the silencing of unintegrated retroviral DNA: some part of the retroviral DNA formed immediately after infection remains unintegrated in the host genome and is transcriptionally repressed (PubMed:30487602). Mediates transcriptional repression of unintegrated…	sp|Q14966|ZN638_HUMAN	sp|Q14966|ZN638_HUMAN Zinc finger protein 638 OS=Homo sapiens OX=9606 GN=ZNF638 PE=1 SV=2	1	8	8	8	6.1	220.62	182950	85386	2.14262
Q9UJY5	ADP-ribosylation factor-binding protein GGA1	GGA1	FUNCTION: Plays a role in protein sorting and trafficking between the trans-Golgi network (TGN) and endosomes. Mediates the ARF-dependent recruitment of clathrin to the TGN and binds ubiquitinated proteins and membrane cargo molecules with a cytosolic acidic cluster-dileucine (DXXLL) motif (PubMed:11301005, PubMed:15886016). Mediates export of the GPCR receptor ADRA2B to the cell surface (PubMed:…	sp|Q9UJY5|GGA1_HUMAN	sp|Q9UJY5|GGA1_HUMAN ADP-ribosylation factor-binding protein GGA1 OS=Homo sapiens OX=9606 GN=GGA1 PE=1 SV=1	1	3	3	3	7	70.383	147230	68753	2.14143
Q562E7	WD repeat-containing protein 81	WDR81	FUNCTION: Functions as a negative regulator of the PI3 kinase/PI3K activity associated with endosomal membranes via BECN1, a core subunit of the PI3K complex. By modifying the phosphatidylinositol 3-phosphate/PtdInsP3 content of endosomal membranes may regulate endosome fusion, recycling, sorting and early to late endosome transport (PubMed:26783301). It is for instance, required for the delivery…	sp|Q562E7|WDR81_HUMAN	sp|Q562E7|WDR81_HUMAN WD repeat-containing protein 81 OS=Homo sapiens OX=9606 GN=WDR81 PE=1 SV=2	1	4	4	4	3.4	211.69	128670	60088	2.14136
Q969G3	SWI/SNF-related matrix-associated actin-dependent regulator of chromatin subfamily E member 1	SMARCE1	FUNCTION: Involved in transcriptional activation and repression of select genes by chromatin remodeling (alteration of DNA-nucleosome topology). Component of SWI/SNF chromatin remodeling complexes that carry out key enzymatic activities, changing chromatin structure by altering DNA-histone contacts within a nucleosome in an ATP-dependent manner. Belongs to the neural progenitors-specific chromati…	sp|Q969G3|SMCE1_HUMAN	sp|Q969G3|SMCE1_HUMAN SWI/SNF-related matrix-associated actin-dependent regulator of chromatin subfamily E member 1 OS=Homo sapiens OX=9606 GN=SMARCE1 PE=1 SV=2	1	11	11	11	29	46.649	1473300	688350	2.14034
Q9Y6X8	Zinc fingers and homeoboxes protein 2	ZHX2	FUNCTION: Acts as a transcriptional repressor (PubMed:12741956). Represses the promoter activity of the CDC25C gene stimulated by NFYA (PubMed:12741956). May play a role in retinal development where it regulates the composition of bipolar cell populations, by promoting differentiation of bipolar OFF-type cells (By similarity). In the brain, may promote maintenance and suppress differentiation of …	sp|Q9Y6X8|ZHX2_HUMAN	sp|Q9Y6X8|ZHX2_HUMAN Zinc fingers and homeoboxes protein 2 OS=Homo sapiens OX=9606 GN=ZHX2 PE=1 SV=1	1	4	4	4	7.8	92.306	186100	86995	2.1392
P36957	Dihydrolipoyllysine-residue succinyltransferase component of 2-oxoglutarate dehydrogenase complex, mitochondrial	DLST	FUNCTION: Dihydrolipoamide succinyltransferase (E2) component of the 2-oxoglutarate dehydrogenase complex. The 2-oxoglutarate dehydrogenase complex catalyzes the overall conversion of 2-oxoglutarate to succinyl-CoA and CO(2). The 2-oxoglutarate dehydrogenase complex is mainly active in the mitochondrion (PubMed:29211711, PubMed:30929736). A fraction of the 2-oxoglutarate dehydrogenase complex als…	sp|P36957|ODO2_HUMAN	sp|P36957|ODO2_HUMAN Dihydrolipoyllysine-residue succinyltransferase component of 2-oxoglutarate dehydrogenase complex, mitochondrial OS=Homo sapiens OX=9606 GN=DLST PE=1 SV=4	1	13	13	12	36.4	48.755	9156600	4285300	2.13675
Q9NW64	Pre-mRNA-splicing factor RBM22	RBM22	FUNCTION: Required for pre-mRNA splicing as component of the activated spliceosome (PubMed:28502770, PubMed:28076346, PubMed:29361316, PubMed:29360106, PubMed:29301961, PubMed:30705154). Involved in the first step of pre-mRNA splicing. Binds directly to the internal stem-loop (ISL) domain of the U6 snRNA and to the pre-mRNA intron near the 5' splice site during the activation and catalytic phases…	sp|Q9NW64|RBM22_HUMAN	sp|Q9NW64|RBM22_HUMAN Pre-mRNA-splicing factor RBM22 OS=Homo sapiens OX=9606 GN=RBM22 PE=1 SV=1	1	6	6	6	17.1	46.895	754420	353170	2.13614
Q92567	Protein FAM168A	FAM168A	FUNCTION: In cancer context, protects cells from induced-DNA damage and apoptosis. Acts, at least in part, through PI3K/AKT/NFKB signaling pathway and by preventing POLB degradation. Decreases POLB ubiquitation and stabilizes its protein levels. {ECO:0000269|PubMed:21334329, ECO:0000269|PubMed:21603883, ECO:0000269|PubMed:23251525, ECO:0000269|PubMed:25260657}.	sp|Q92567|F168A_HUMAN	sp|Q92567|F168A_HUMAN Protein FAM168A OS=Homo sapiens OX=9606 GN=FAM168A PE=1 SV=2	1	2	2	2	18.4	26.184	430120	201360	2.13607
Q9NP50	SIN3-HDAC complex-associated factor	SINHCAF	FUNCTION: Subunit of the Sin3 deacetylase complex (Sin3/HDAC), this subunit is important for the repression of genes encoding components of the TGF-beta signaling pathway (PubMed:22865885, PubMed:22984288). Core component of a SIN3A complex (composed of at least SINHCAF, SIN3A, HDAC1, SAP30, RBBP4, OGT and TET1) present in embryonic stem (ES) cells. Promotes the stability of SIN3A and its presenc…	sp|Q9NP50|SHCAF_HUMAN	sp|Q9NP50|SHCAF_HUMAN SIN3-HDAC complex-associated factor OS=Homo sapiens OX=9606 GN=SINHCAF PE=1 SV=1	1	2	2	2	13.6	24.852	83138	38994	2.13207
O43598	2-deoxynucleoside 5-phosphate N-hydrolase 1	DNPH1	FUNCTION: Catalyzes the cleavage of the N-glycosidic bond of deoxyribonucleoside 5'-monophosphates to yield deoxyribose 5-phosphate and a purine or pyrimidine base. Deoxyribonucleoside 5'-monophosphates containing purine bases are preferred to those containing pyrimidine bases. {ECO:0000255|HAMAP-Rule:MF_03036, ECO:0000269|PubMed:24260472, ECO:0000269|PubMed:25108359}.	sp|O43598|DNPH1_HUMAN	sp|O43598|DNPH1_HUMAN 2-deoxynucleoside 5-phosphate N-hydrolase 1 OS=Homo sapiens OX=9606 GN=DNPH1 PE=1 SV=1	1	4	4	4	35.1	19.108	592300	278040	2.13027
Q9BQ39	ATP-dependent RNA helicase DDX50	DDX50		sp|Q9BQ39|DDX50_HUMAN	sp|Q9BQ39|DDX50_HUMAN ATP-dependent RNA helicase DDX50 OS=Homo sapiens OX=9606 GN=DDX50 PE=1 SV=1	1	12	10	10	22.3	82.564	844930	396890	2.12888
Q8NG68	Tubulin--tyrosine ligase	TTL	FUNCTION: Catalyzes the post-translational addition of a tyrosine to the C-terminal end of detyrosinated alpha-tubulin. {ECO:0000269|PubMed:25908662}.	sp|Q8NG68|TTL_HUMAN	sp|Q8NG68|TTL_HUMAN Tubulin--tyrosine ligase OS=Homo sapiens OX=9606 GN=TTL PE=1 SV=2	1	2	2	2	7.7	43.212	135840	63827	2.12825
P54764	Ephrin type-A receptor 4	EPHA4	FUNCTION: Receptor tyrosine kinase which binds membrane-bound ephrin family ligands residing on adjacent cells, leading to contact-dependent bidirectional signaling into neighboring cells. The signaling pathway downstream of the receptor is referred to as forward signaling while the signaling pathway downstream of the ephrin ligand is referred to as reverse signaling. Highly promiscuous, it has t…	sp|P54764|EPHA4_HUMAN	sp|P54764|EPHA4_HUMAN Ephrin type-A receptor 4 OS=Homo sapiens OX=9606 GN=EPHA4 PE=1 SV=1	1	2	1	1	2.7	109.86	143980	67762	2.12479
Q96S59	Ran-binding protein 9	RANBP9	FUNCTION: May act as scaffolding protein, and as adapter protein to couple membrane receptors to intracellular signaling pathways (Probable). Acts as a mediator of cell spreading and actin cytoskeleton rearrangement (PubMed:18710924). Core component of the CTLH E3 ubiquitin-protein ligase complex that selectively accepts ubiquitin from UBE2H and mediates ubiquitination and subsequent proteasomal …	sp|Q96S59|RANB9_HUMAN	sp|Q96S59|RANB9_HUMAN Ran-binding protein 9 OS=Homo sapiens OX=9606 GN=RANBP9 PE=1 SV=1	1	10	10	10	20.9	77.846	1129200	532120	2.12208
Q9Y467	Sal-like protein 2	SALL2	FUNCTION: Probable transcription factor that plays a role in eye development before, during, and after optic fissure closure. {ECO:0000269|PubMed:24412933}.	sp|Q9Y467|SALL2_HUMAN	sp|Q9Y467|SALL2_HUMAN Sal-like protein 2 OS=Homo sapiens OX=9606 GN=SALL2 PE=1 SV=4	1	1	1	1	1.9	105.31	59966	28261	2.12186
Q6AHZ1	Zinc finger protein 518A	ZNF518A	FUNCTION: May be involved in transcriptional regulation.	sp|Q6AHZ1|Z518A_HUMAN	sp|Q6AHZ1|Z518A_HUMAN Zinc finger protein 518A OS=Homo sapiens OX=9606 GN=ZNF518A PE=1 SV=2	1	1	1	1	0.9	166.78	109110	51435	2.12132
Q96QE5	Transcription elongation factor, mitochondrial	TEFM	FUNCTION: Transcription elongation factor which increases mitochondrial RNA polymerase processivity. Regulates transcription of the mitochondrial genome, including genes important for the oxidative phosphorylation machinery. {ECO:0000269|PubMed:21278163}.	sp|Q96QE5|TEFM_HUMAN	sp|Q96QE5|TEFM_HUMAN Transcription elongation factor, mitochondrial OS=Homo sapiens OX=9606 GN=TEFM PE=1 SV=1	1	1	1	1	2.8	41.676	98928	46637	2.12123
Q6DN90	IQ motif and SEC7 domain-containing protein 1	IQSEC1	FUNCTION: Guanine nucleotide exchange factor for ARF1 and ARF6 (PubMed:24058294, PubMed:11226253). Guanine nucleotide exchange factor activity is enhanced by lipid binding (PubMed:24058294). Accelerates GTP binding by ARFs of all three classes. Guanine nucleotide exchange protein for ARF6, mediating internalisation of beta-1 integrin (PubMed:16461286). Involved in neuronal development (Probable).…	sp|Q6DN90|IQEC1_HUMAN	sp|Q6DN90|IQEC1_HUMAN IQ motif and SEC7 domain-containing protein 1 OS=Homo sapiens OX=9606 GN=IQSEC1 PE=1 SV=1	1	1	1	1	1.1	108.31	15234	7190.6	2.1186
P38435	Vitamin K-dependent gamma-carboxylase	GGCX	FUNCTION: Mediates the vitamin K-dependent carboxylation of glutamate residues to calcium-binding gamma-carboxyglutamate (Gla) residues with the concomitant conversion of the reduced hydroquinone form of vitamin K to vitamin K epoxide. {ECO:0000269|PubMed:17073445}.	sp|P38435|VKGC_HUMAN	sp|P38435|VKGC_HUMAN Vitamin K-dependent gamma-carboxylase OS=Homo sapiens OX=9606 GN=GGCX PE=1 SV=2	1	6	6	6	9.4	87.56	1067000	504250	2.11601
Q6NZI2	Caveolae-associated protein 1	CAVIN1	FUNCTION: Plays an important role in caveolae formation and organization. Essential for the formation of caveolae in all tissues (PubMed:18056712, PubMed:18191225, PubMed:19726876). Core component of the CAVIN complex which is essential for recruitment of the complex to the caveolae in presence of calveolin-1 (CAV1). Essential for normal oligomerization of CAV1. Promotes ribosomal transcriptional…	sp|Q6NZI2|CAVN1_HUMAN	sp|Q6NZI2|CAVN1_HUMAN Caveolae-associated protein 1 OS=Homo sapiens OX=9606 GN=CAVIN1 PE=1 SV=1	1	7	7	7	21.8	43.476	3646000	1723500	2.11546
Q5VUD6	Divergent protein kinase domain 1B	DIPK1B		sp|Q5VUD6|DIK1B_HUMAN	sp|Q5VUD6|DIK1B_HUMAN Divergent protein kinase domain 1B OS=Homo sapiens OX=9606 GN=DIPK1B PE=1 SV=3	1	2	2	2	7	48.582	148810	70375	2.11453
Q15007	Pre-mRNA-splicing regulator WTAP	WTAP	FUNCTION: Associated component of the WMM complex, a complex that mediates N6-methyladenosine (m6A) methylation of RNAs, a modification that plays a role in the efficiency of mRNA splicing and RNA processing (PubMed:29507755). Required for accumulation of METTL3 and METTL14 to nuclear speckle (PubMed:24316715, PubMed:24407421, PubMed:24981863). Acts as a mRNA splicing regulator (PubMed:12444081).…	sp|Q15007|FL2D_HUMAN	sp|Q15007|FL2D_HUMAN Pre-mRNA-splicing regulator WTAP OS=Homo sapiens OX=9606 GN=WTAP PE=1 SV=2	1	7	7	7	26	44.243	954600	451550	2.11405
Q06203	Amidophosphoribosyltransferase	PPAT		sp|Q06203|PUR1_HUMAN	sp|Q06203|PUR1_HUMAN Amidophosphoribosyltransferase OS=Homo sapiens OX=9606 GN=PPAT PE=1 SV=1	1	13	13	13	30	57.398	1868700	884280	2.11324
Q6UXT9	Protein ABHD15	ABHD15		sp|Q6UXT9|ABH15_HUMAN	sp|Q6UXT9|ABH15_HUMAN Protein ABHD15 OS=Homo sapiens OX=9606 GN=ABHD15 PE=1 SV=2	1	1	1	1	3.6	51.771	61900	29309	2.11198
Q8TEU7	Rap guanine nucleotide exchange factor 6	RAPGEF6	FUNCTION: Guanine nucleotide exchange factor (GEF) for Rap1A, Rap2A and M-Ras GTPases. Does not interact with cAMP. {ECO:0000269|PubMed:11524421, ECO:0000269|PubMed:12581858}.	sp|Q8TEU7|RPGF6_HUMAN	sp|Q8TEU7|RPGF6_HUMAN Rap guanine nucleotide exchange factor 6 OS=Homo sapiens OX=9606 GN=RAPGEF6 PE=1 SV=2	1	2	2	2	2.1	179.42	156480	74111	2.11143
Q9UEG4	Zinc finger protein 629	ZNF629	FUNCTION: May be involved in transcriptional regulation.	sp|Q9UEG4|ZN629_HUMAN	sp|Q9UEG4|ZN629_HUMAN Zinc finger protein 629 OS=Homo sapiens OX=9606 GN=ZNF629 PE=1 SV=2	1	9	9	9	14.6	96.619	425810	201700	2.11111
Q9NVP1	ATP-dependent RNA helicase DDX18	DDX18	FUNCTION: Probable RNA-dependent helicase.	sp|Q9NVP1|DDX18_HUMAN	sp|Q9NVP1|DDX18_HUMAN ATP-dependent RNA helicase DDX18 OS=Homo sapiens OX=9606 GN=DDX18 PE=1 SV=2	1	6	6	6	14.8	75.406	221720	105120	2.10921
O60942	mRNA-capping enzyme	RNGTT	FUNCTION: Bifunctional mRNA-capping enzyme exhibiting RNA 5'-triphosphatase activity in the N-terminal part and mRNA guanylyltransferase activity in the C-terminal part. Catalyzes the first two steps of cap formation: by removing the gamma-phosphate from the 5'-triphosphate end of nascent mRNA to yield a diphosphate end, and by transferring the gmp moiety of GTP to the 5'-diphosphate terminus. {E…	sp|O60942|MCE1_HUMAN	sp|O60942|MCE1_HUMAN mRNA-capping enzyme OS=Homo sapiens OX=9606 GN=RNGTT PE=1 SV=1	1	10	10	10	22.4	68.556	1626500	771230	2.10897
Q8TBA6	Golgin subfamily A member 5	GOLGA5	FUNCTION: Involved in maintaining Golgi structure. Stimulates the formation of Golgi stacks and ribbons. Involved in intra-Golgi retrograde transport. {ECO:0000269|PubMed:12538640, ECO:0000269|PubMed:15718469}.	sp|Q8TBA6|GOGA5_HUMAN	sp|Q8TBA6|GOGA5_HUMAN Golgin subfamily A member 5 OS=Homo sapiens OX=9606 GN=GOLGA5 PE=1 SV=3	1	14	14	14	29	83.023	1561000	740570	2.10784
P42684	Tyrosine-protein kinase ABL2	ABL2	FUNCTION: Non-receptor tyrosine-protein kinase that plays an ABL1-overlapping role in key processes linked to cell growth and survival such as cytoskeleton remodeling in response to extracellular stimuli, cell motility and adhesion and receptor endocytosis. Coordinates actin remodeling through tyrosine phosphorylation of proteins controlling cytoskeleton dynamics like MYH10 (involved in movement)…	sp|P42684|ABL2_HUMAN	sp|P42684|ABL2_HUMAN Tyrosine-protein kinase ABL2 OS=Homo sapiens OX=9606 GN=ABL2 PE=1 SV=1	1	2	2	1	3.4	128.34	60140	28587	2.10375
Q12834	Cell division cycle protein 20 homolog	CDC20	FUNCTION: Required for full ubiquitin ligase activity of the anaphase promoting complex/cyclosome (APC/C) and may confer substrate specificity upon the complex. Is regulated by MAD2L1: in metaphase the MAD2L1-CDC20-APC/C ternary complex is inactive and in anaphase the CDC20-APC/C binary complex is active in degrading substrates. The CDC20-APC/C complex positively regulates the formation of synapt…	sp|Q12834|CDC20_HUMAN	sp|Q12834|CDC20_HUMAN Cell division cycle protein 20 homolog OS=Homo sapiens OX=9606 GN=CDC20 PE=1 SV=2	1	5	5	5	19.2	54.722	382250	182060	2.09958
P62304	Small nuclear ribonucleoprotein E	SNRPE	FUNCTION: Plays role in pre-mRNA splicing as core component of the SMN-Sm complex that mediates spliceosomal snRNP assembly and as component of the spliceosomal U1, U2, U4 and U5 small nuclear ribonucleoproteins (snRNPs), the building blocks of the spliceosome (PubMed:11991638, PubMed:18984161, PubMed:23246290, PubMed:19325628, PubMed:23333303, PubMed:25555158, PubMed:26912367, PubMed:28502770, P…	sp|P62304|RUXE_HUMAN	sp|P62304|RUXE_HUMAN Small nuclear ribonucleoprotein E OS=Homo sapiens OX=9606 GN=SNRPE PE=1 SV=1	1	2	2	2	26.1	10.803	3926600	1870200	2.09956
Q8IXS6	Paralemmin-2	PALM2		sp|Q8IXS6|PALM2_HUMAN	sp|Q8IXS6|PALM2_HUMAN Paralemmin-2 OS=Homo sapiens OX=9606 GN=PALM2 PE=1 SV=3	1	5	4	4	18.2	42.185	125730	59888	2.09942
Q9BY77	Polymerase delta-interacting protein 3	POLDIP3	FUNCTION: Is involved in regulation of translation. Is preferentially associated with CBC-bound spliced mRNA-protein complexes during the pioneer round of mRNA translation. Contributes to enhanced translational efficiency of spliced over nonspliced mRNAs. Recruits activated ribosomal protein S6 kinase beta-1 I/RPS6KB1 to newly synthesized mRNA. Involved in nuclear mRNA export; probably mediated b…	sp|Q9BY77|PDIP3_HUMAN	sp|Q9BY77|PDIP3_HUMAN Polymerase delta-interacting protein 3 OS=Homo sapiens OX=9606 GN=POLDIP3 PE=1 SV=2	1	10	10	10	34	46.089	2436300	1163100	2.09466
Q8TCU4	Centrosome-associated protein ALMS1	ALMS1	FUNCTION: Involved in PCM1-dependent intracellular transport. Required, directly or indirectly, for the localization of NCAPD2 to the proximal ends of centrioles. Required for proper formation and/or maintenance of primary cilia (PC), microtubule-based structures that protrude from the surface of epithelial cells. {ECO:0000269|PubMed:17954613}.	sp|Q8TCU4|ALMS1_HUMAN	sp|Q8TCU4|ALMS1_HUMAN Centrosome-associated protein ALMS1 OS=Homo sapiens OX=9606 GN=ALMS1 PE=1 SV=4	1	2	2	2	0.6	461.06	672720	321580	2.09192
Q96I25	Splicing factor 45	RBM17	FUNCTION: Splice factor that binds to the single-stranded 3'AG at the exon/intron border and promotes its utilization in the second catalytic step. Involved in the regulation of alternative splicing and the utilization of cryptic splice sites. Promotes the utilization of a cryptic splice site created by the beta-110 mutation in the HBB gene. The resulting frameshift leads to sickle cell anemia. {…	sp|Q96I25|SPF45_HUMAN	sp|Q96I25|SPF45_HUMAN Splicing factor 45 OS=Homo sapiens OX=9606 GN=RBM17 PE=1 SV=1	1	8	8	8	26.9	44.961	1769700	846000	2.09184
Q86W42	THO complex subunit 6 homolog	THOC6	FUNCTION: Acts as component of the THO subcomplex of the TREX complex which is thought to couple mRNA transcription, processing and nuclear export, and which specifically associates with spliced mRNA and not with unspliced pre-mRNA. TREX is recruited to spliced mRNAs by a transcription-independent mechanism, binds to mRNA upstream of the exon-junction complex (EJC) and is recruited in a splicing-…	sp|Q86W42|THOC6_HUMAN	sp|Q86W42|THOC6_HUMAN THO complex subunit 6 homolog OS=Homo sapiens OX=9606 GN=THOC6 PE=1 SV=1	1	9	9	9	40.5	37.535	1318500	630800	2.0902
Q9BZK7	F-box-like/WD repeat-containing protein TBL1XR1	TBL1XR1	FUNCTION: F-box-like protein involved in the recruitment of the ubiquitin/19S proteasome complex to nuclear receptor-regulated transcription units. Plays an essential role in transcription activation mediated by nuclear receptors. Probably acts as integral component of the N-Cor corepressor complex that mediates the recruitment of the 19S proteasome complex, leading to the subsequent proteasomal …	sp|Q9BZK7|TBL1R_HUMAN;sp|O60907|TBL1X_HUMAN;sp|Q9BQ87|TBL1Y_HUMAN	sp|Q9BZK7|TBL1R_HUMAN F-box-like/WD repeat-containing protein TBL1XR1 OS=Homo sapiens OX=9606 GN=TBL1XR1 PE=1 SV=1	3	12	12	12	38.3	55.594	2012800	963220	2.08966
Q8IY18	Structural maintenance of chromosomes protein 5	SMC5	FUNCTION: Core component of the SMC5-SMC6 complex, a complex involved in repair of DNA double-strand breaks by homologous recombination. The complex may promote sister chromatid homologous recombination by recruiting the SMC1-SMC3 cohesin complex to double-strand breaks. The complex is required for telomere maintenance via recombination in ALT (alternative lengthening of telomeres) cell lines and…	sp|Q8IY18|SMC5_HUMAN	sp|Q8IY18|SMC5_HUMAN Structural maintenance of chromosomes protein 5 OS=Homo sapiens OX=9606 GN=SMC5 PE=1 SV=2	1	4	4	4	5.4	128.81	141210	67622	2.08823
Q96KQ4	Apoptosis-stimulating of p53 protein 1	PPP1R13B	FUNCTION: Regulator that plays a central role in regulation of apoptosis via its interaction with p53/TP53 (PubMed:11684014, PubMed:12524540). Regulates TP53 by enhancing the DNA binding and transactivation function of TP53 on the promoters of proapoptotic genes in vivo. {ECO:0000269|PubMed:11684014, ECO:0000269|PubMed:12524540}.	sp|Q96KQ4|ASPP1_HUMAN	sp|Q96KQ4|ASPP1_HUMAN Apoptosis-stimulating of p53 protein 1 OS=Homo sapiens OX=9606 GN=PPP1R13B PE=1 SV=3	1	1	1	1	1.2	119.56	27819	13323	2.08804
Q9P0V9	Septin-10	SEPTIN10	FUNCTION: Filament-forming cytoskeletal GTPase. May play a role in cytokinesis (Potential). {ECO:0000305}.	sp|Q9P0V9|SEP10_HUMAN	sp|Q9P0V9|SEP10_HUMAN Septin-10 OS=Homo sapiens OX=9606 GN=SEPTIN10 PE=1 SV=2	1	8	7	7	25.3	52.592	825430	395520	2.08695
Q7Z3U7	Protein MON2 homolog	MON2	FUNCTION: May be required for traffic between late Golgi and early endosomes. {ECO:0000250}.	sp|Q7Z3U7|MON2_HUMAN	sp|Q7Z3U7|MON2_HUMAN Protein MON2 homolog OS=Homo sapiens OX=9606 GN=MON2 PE=1 SV=3	1	14	14	14	9.8	190.36	1044600	500600	2.0867
Q8NFD5	AT-rich interactive domain-containing protein 1B	ARID1B	FUNCTION: Involved in transcriptional activation and repression of select genes by chromatin remodeling (alteration of DNA-nucleosome topology). Component of SWI/SNF chromatin remodeling complexes that carry out key enzymatic activities, changing chromatin structure by altering DNA-histone contacts within a nucleosome in an ATP-dependent manner. Belongs to the neural progenitors-specific chromati…	sp|Q8NFD5|ARI1B_HUMAN	sp|Q8NFD5|ARI1B_HUMAN AT-rich interactive domain-containing protein 1B OS=Homo sapiens OX=9606 GN=ARID1B PE=1 SV=3	1	14	13	13	10.6	243.94	1293800	620980	2.08348
Q13131	5-AMP-activated protein kinase catalytic subunit alpha-1	PRKAA1	FUNCTION: Catalytic subunit of AMP-activated protein kinase (AMPK), an energy sensor protein kinase that plays a key role in regulating cellular energy metabolism. In response to reduction of intracellular ATP levels, AMPK activates energy-producing pathways and inhibits energy-consuming processes: inhibits protein, carbohydrate and lipid biosynthesis, as well as cell growth and proliferation. AM…	sp|Q13131|AAPK1_HUMAN;sp|P54646|AAPK2_HUMAN	sp|Q13131|AAPK1_HUMAN 5-AMP-activated protein kinase catalytic subunit alpha-1 OS=Homo sapiens OX=9606 GN=PRKAA1 PE=1 SV=4	2	10	10	10	25	64.009	2102900	1010000	2.08208
P10606	Cytochrome c oxidase subunit 5B, mitochondrial	COX5B	FUNCTION: Component of the cytochrome c oxidase, the last enzyme in the mitochondrial electron transport chain which drives oxidative phosphorylation. The respiratory chain contains 3 multisubunit complexes succinate dehydrogenase (complex II, CII), ubiquinol-cytochrome c oxidoreductase (cytochrome b-c1 complex, complex III, CIII) and cytochrome c oxidase (complex IV, CIV), that cooperate to tran…	sp|P10606|COX5B_HUMAN	sp|P10606|COX5B_HUMAN Cytochrome c oxidase subunit 5B, mitochondrial OS=Homo sapiens OX=9606 GN=COX5B PE=1 SV=2	1	6	6	6	50.4	13.696	6756500	3246400	2.08123
Q9H6U6	BCAS3 microtubule associated cell migration factor	BCAS3	FUNCTION: Plays a role in angiogenesis. Participates in the regulation of cell polarity and directional endothelial cell migration by mediating both the activation and recruitment of CDC42 and the reorganization of the actin cytoskeleton at the cell leading edge. Promotes filipodia formation (By similarity). Functions synergistically with PELP1 as a transcriptional coactivator of estrogen recepto…	sp|Q9H6U6|BCAS3_HUMAN	sp|Q9H6U6|BCAS3_HUMAN BCAS3 microtubule associated cell migration factor OS=Homo sapiens OX=9606 GN=BCAS3 PE=1 SV=3	1	10	10	10	15.8	101.24	721050	347050	2.07765
Q96K12	Fatty acyl-CoA reductase 2	FAR2	FUNCTION: Catalyzes the reduction of saturated but not unsaturated C16 or C18 fatty acyl-CoA to fatty alcohols. A lower activity can be observed with shorter fatty acyl-CoA substrates (PubMed:15220348). It may play a role in the production of ether lipids/plasmalogens and wax monoesters which synthesis requires fatty alcohols as substrates (By similarity). {ECO:0000250|UniProtKB:Q8WVX9, ECO:00002…	sp|Q96K12|FACR2_HUMAN	sp|Q96K12|FACR2_HUMAN Fatty acyl-CoA reductase 2 OS=Homo sapiens OX=9606 GN=FAR2 PE=1 SV=1	1	2	2	2	4.3	59.438	92106	44357	2.07647
Q9NYL4	Peptidyl-prolyl cis-trans isomerase FKBP11	FKBP11	FUNCTION: PPIases accelerate the folding of proteins during protein synthesis.	sp|Q9NYL4|FKB11_HUMAN	sp|Q9NYL4|FKB11_HUMAN Peptidyl-prolyl cis-trans isomerase FKBP11 OS=Homo sapiens OX=9606 GN=FKBP11 PE=1 SV=1	1	2	2	2	9	22.18	363040	175070	2.07368
Q71F23	Centromere protein U	CENPU	FUNCTION: Component of the CENPA-NAC (nucleosome-associated) complex, a complex that plays a central role in assembly of kinetochore proteins, mitotic progression and chromosome segregation. The CENPA-NAC complex recruits the CENPA-CAD (nucleosome distal) complex and may be involved in incorporation of newly synthesized CENPA into centromeres. Plays an important role in the correct PLK1 localizat…	sp|Q71F23|CENPU_HUMAN	sp|Q71F23|CENPU_HUMAN Centromere protein U OS=Homo sapiens OX=9606 GN=CENPU PE=1 SV=1	1	2	2	2	8.4	47.521	50490	24369	2.07189
Q96GX5	Serine/threonine-protein kinase greatwall	MASTL	FUNCTION: Serine/threonine kinase that plays a key role in M phase by acting as a regulator of mitosis entry and maintenance. Acts by promoting the inactivation of protein phosphatase 2A (PP2A) during M phase: does not directly inhibit PP2A but acts by mediating phosphorylation and subsequent activation of ARPP19 and ENSA at 'Ser-62' and 'Ser-67', respectively. ARPP19 and ENSA are phosphatase inh…	sp|Q96GX5|GWL_HUMAN	sp|Q96GX5|GWL_HUMAN Serine/threonine-protein kinase greatwall OS=Homo sapiens OX=9606 GN=MASTL PE=1 SV=1	1	5	5	5	9.1	97.318	318080	153640	2.07029
Q13616	Cullin-1	CUL1	FUNCTION: Core component of multiple cullin-RING-based SCF (SKP1-CUL1-F-box protein) E3 ubiquitin-protein ligase complexes, which mediate the ubiquitination of proteins involved in cell cycle progression, signal transduction and transcription. SCF complexes and ARIH1 collaborate in tandem to mediate ubiquitination of target proteins (PubMed:27565346). In the SCF complex, serves as a rigid scaffol…	sp|Q13616|CUL1_HUMAN	sp|Q13616|CUL1_HUMAN Cullin-1 OS=Homo sapiens OX=9606 GN=CUL1 PE=1 SV=2	1	15	15	15	24.4	89.677	2425400	1172900	2.06787
Q9NVM9	Integrator complex subunit 13	INTS13	FUNCTION: Crucial regulator of the mitotic cell cycle and development. At prophase, required for dynein anchoring to the nuclear envelope important for proper centrosome-nucleus coupling. At G2/M phase, may be required for proper spindle formation and execution of cytokinesis. Probable component of the Integrator (INT) complex, a complex involved in the small nuclear RNAs (snRNA) U1 and U2 transc…	sp|Q9NVM9|INT13_HUMAN	sp|Q9NVM9|INT13_HUMAN Integrator complex subunit 13 OS=Homo sapiens OX=9606 GN=INTS13 PE=1 SV=2	1	8	8	8	14.7	80.224	500580	242100	2.06766
Q13155	Aminoacyl tRNA synthase complex-interacting multifunctional protein 2	AIMP2	FUNCTION: Required for assembly and stability of the aminoacyl-tRNA synthase complex (PubMed:19131329). Mediates ubiquitination and degradation of FUBP1, a transcriptional activator of MYC, leading to MYC down-regulation which is required for aveolar type II cell differentiation. Blocks MDM2-mediated ubiquitination and degradation of p53/TP53. Functions as a proapoptotic factor. {ECO:0000269|PubM…	sp|Q13155|AIMP2_HUMAN	sp|Q13155|AIMP2_HUMAN Aminoacyl tRNA synthase complex-interacting multifunctional protein 2 OS=Homo sapiens OX=9606 GN=AIMP2 PE=1 SV=2	1	6	6	6	28.1	35.348	3949900	1910400	2.06758
Q16880	2-hydroxyacylsphingosine 1-beta-galactosyltransferase	UGT8	FUNCTION: Catalyzes the transfer of galactose to ceramide, a key enzymatic step in the biosynthesis of galactocerebrosides, which are abundant sphingolipids of the myelin membrane of the central nervous system and peripheral nervous system. {ECO:0000250|UniProtKB:Q09426}.	sp|Q16880|CGT_HUMAN	sp|Q16880|CGT_HUMAN 2-hydroxyacylsphingosine 1-beta-galactosyltransferase OS=Homo sapiens OX=9606 GN=UGT8 PE=1 SV=2	1	3	3	3	6.1	61.437	2955800	1430900	2.06569
O43633	Charged multivesicular body protein 2a	CHMP2A	FUNCTION: Probable core component of the endosomal sorting required for transport complex III (ESCRT-III) which is involved in multivesicular bodies (MVBs) formation and sorting of endosomal cargo proteins into MVBs. MVBs contain intraluminal vesicles (ILVs) that are generated by invagination and scission from the limiting membrane of the endosome and mostly are delivered to lysosomes enabling de…	sp|O43633|CHM2A_HUMAN	sp|O43633|CHM2A_HUMAN Charged multivesicular body protein 2a OS=Homo sapiens OX=9606 GN=CHMP2A PE=1 SV=1	1	5	5	5	16.7	25.104	356970	172890	2.06472
P20936	Ras GTPase-activating protein 1	RASA1	FUNCTION: Inhibitory regulator of the Ras-cyclic AMP pathway. Stimulates the GTPase of normal but not oncogenic Ras p21; this stimulation may be further increased in the presence of NCK1. {ECO:0000269|PubMed:11389730, ECO:0000269|PubMed:8360177}.	sp|P20936|RASA1_HUMAN	sp|P20936|RASA1_HUMAN Ras GTPase-activating protein 1 OS=Homo sapiens OX=9606 GN=RASA1 PE=1 SV=1	1	5	5	5	7.1	116.4	333840	161740	2.06405
Q93050	V-type proton ATPase 116 kDa subunit a 1	ATP6V0A1	FUNCTION: Required for assembly and activity of the vacuolar ATPase. Potential role in differential targeting and regulation of the enzyme for a specific organelle (By similarity). {ECO:0000250}.	sp|Q93050|VPP1_HUMAN	sp|Q93050|VPP1_HUMAN V-type proton ATPase 116 kDa subunit a 1 OS=Homo sapiens OX=9606 GN=ATP6V0A1 PE=1 SV=3	1	12	12	11	18.8	96.412	2601800	1261200	2.06296
Q9C0E8	Endoplasmic reticulum junction formation protein lunapark	LNPK	FUNCTION: Endoplasmic reticulum (ER)-shaping membrane protein that plays a role in determining ER morphology (PubMed:30032983). Involved in the stabilization of nascent three-way ER tubular junctions within the ER network (PubMed:24223779, PubMed:25404289, PubMed:25548161, PubMed:27619977). May also play a role as a curvature-stabilizing protein within the three-way ER tubular junction network (P…	sp|Q9C0E8|LNP_HUMAN	sp|Q9C0E8|LNP_HUMAN Endoplasmic reticulum junction formation protein lunapark OS=Homo sapiens OX=9606 GN=LNPK PE=1 SV=2	1	10	10	10	31.8	47.739	2547800	1235500	2.06216
Q9Y5J1	U3 small nucleolar RNA-associated protein 18 homolog	UTP18	FUNCTION: Involved in nucleolar processing of pre-18S ribosomal RNA. {ECO:0000250}.	sp|Q9Y5J1|UTP18_HUMAN	sp|Q9Y5J1|UTP18_HUMAN U3 small nucleolar RNA-associated protein 18 homolog OS=Homo sapiens OX=9606 GN=UTP18 PE=1 SV=3	1	3	3	3	8.6	62.003	117880	57191	2.06116
O95166	Gamma-aminobutyric acid receptor-associated protein	GABARAP	FUNCTION: Ubiquitin-like modifier that plays a role in intracellular transport of GABA(A) receptors and its interaction with the cytoskeleton. Involved in apoptosis. Involved in autophagy. While LC3s are involved in elongation of the phagophore membrane, the GABARAP/GATE-16 subfamily is essential for a later stage in autophagosome maturation (PubMed:15977068). Through its interaction with the ret…	sp|O95166|GBRAP_HUMAN	sp|O95166|GBRAP_HUMAN Gamma-aminobutyric acid receptor-associated protein OS=Homo sapiens OX=9606 GN=GABARAP PE=1 SV=1	1	1	1	1	9.4	13.918	467310	226850	2.06
Q9H2U1	ATP-dependent DNA/RNA helicase DHX36	DHX36	FUNCTION: Multifunctional ATP-dependent helicase that unwinds G-quadruplex (G4) structures (PubMed:16150737, PubMed:18854321, PubMed:20472641, PubMed:21586581). Plays a role in many biological processes such as genomic integrity, gene expression regulations and as a sensor to initiate antiviral responses (PubMed:14731398, PubMed:18279852, PubMed:21993297, PubMed:22238380, PubMed:25579584). G4 str…	sp|Q9H2U1|DHX36_HUMAN	sp|Q9H2U1|DHX36_HUMAN ATP-dependent DNA/RNA helicase DHX36 OS=Homo sapiens OX=9606 GN=DHX36 PE=1 SV=2	1	12	12	12	16.6	114.76	1171000	568930	2.05825
O75155	Cullin-associated NEDD8-dissociated protein 2	CAND2	FUNCTION: Probable assembly factor of SCF (SKP1-CUL1-F-box protein) E3 ubiquitin ligase complexes that promotes the exchange of the substrate-recognition F-box subunit in SCF complexes, thereby playing a key role in the cellular repertoire of SCF complexes. {ECO:0000250}.	sp|O75155|CAND2_HUMAN	sp|O75155|CAND2_HUMAN Cullin-associated NEDD8-dissociated protein 2 OS=Homo sapiens OX=9606 GN=CAND2 PE=1 SV=3	1	7	6	6	7.7	135.25	312610	152040	2.0561
Q6KC79	Nipped-B-like protein	NIPBL	FUNCTION: Plays an important role in the loading of the cohesin complex on to DNA. Forms a heterodimeric complex (also known as cohesin loading complex) with MAU2/SCC4 which mediates the loading of the cohesin complex onto chromatin (PubMed:22628566, PubMed:28914604). Plays a role in cohesin loading at sites of DNA damage. Its recruitment to double-strand breaks (DSBs) sites occurs in a CBX3-, RN…	sp|Q6KC79|NIPBL_HUMAN	sp|Q6KC79|NIPBL_HUMAN Nipped-B-like protein OS=Homo sapiens OX=9606 GN=NIPBL PE=1 SV=2	1	17	17	17	9.2	316.05	679490	330990	2.0529
Q9BZV1	UBX domain-containing protein 6	UBXN6	FUNCTION: May negatively regulate the ATPase activity of VCP, an ATP-driven segregase that associates with different cofactors to control a wide variety of cellular processes (PubMed:26475856). As a cofactor of VCP, it may play a role in the transport of CAV1 to lysosomes for degradation (PubMed:21822278, PubMed:23335559). It may also play a role in endoplasmic reticulum-associated degradation (E…	sp|Q9BZV1|UBXN6_HUMAN	sp|Q9BZV1|UBXN6_HUMAN UBX domain-containing protein 6 OS=Homo sapiens OX=9606 GN=UBXN6 PE=1 SV=1	1	7	7	7	25.4	49.753	1150500	561040	2.05066
O95631	Netrin-1	NTN1	FUNCTION: Netrins control guidance of CNS commissural axons and peripheral motor axons. Its association with either DCC or some UNC5 receptors will lead to axon attraction or repulsion, respectively. Binding to UNC5C might cause dissociation of UNC5C from polymerized TUBB3 in microtubules and thereby lead to increased microtubule dynamics and axon repulsion (PubMed:28483977). Involved in dorsal r…	sp|O95631|NET1_HUMAN	sp|O95631|NET1_HUMAN Netrin-1 OS=Homo sapiens OX=9606 GN=NTN1 PE=1 SV=2	1	1	1	1	2.5	67.748	11961	5853.7	2.04332
Q6NUQ1	RAD50-interacting protein 1	RINT1	FUNCTION: Involved in regulation of membrane traffic between the Golgi and the endoplasmic reticulum (ER); the function is proposed to depend on its association in the NRZ complex which is believed to play a role in SNARE assembly at the ER. May play a role in cell cycle checkpoint control (PubMed:11096100). Essential for telomere length control (PubMed:16600870). {ECO:0000269|PubMed:11096100, EC…	sp|Q6NUQ1|RINT1_HUMAN	sp|Q6NUQ1|RINT1_HUMAN RAD50-interacting protein 1 OS=Homo sapiens OX=9606 GN=RINT1 PE=1 SV=1	1	7	7	7	11.1	90.631	574820	281490	2.04206
P17098	Zinc finger protein 8	ZNF8	FUNCTION: Transcriptional repressor. May modulate BMP and TGF-beta signal transduction, through its interaction with SMAD proteins. {ECO:0000250|UniProtKB:Q8BGV5}.	sp|P17098|ZNF8_HUMAN	sp|P17098|ZNF8_HUMAN Zinc finger protein 8 OS=Homo sapiens OX=9606 GN=ZNF8 PE=1 SV=2	1	2	2	2	4.9	64.97	39636	19417	2.0413
Q9H0E9	Bromodomain-containing protein 8	BRD8	FUNCTION: May act as a coactivator during transcriptional activation by hormone-activated nuclear receptors (NR). Isoform 2 stimulates transcriptional activation by AR/DHTR, ESR1/NR3A1, RXRA/NR2B1 and THRB/ERBA2. At least isoform 1 and isoform 2 are components of the NuA4 histone acetyltransferase (HAT) complex which is involved in transcriptional activation of select genes principally by acetyla…	sp|Q9H0E9|BRD8_HUMAN	sp|Q9H0E9|BRD8_HUMAN Bromodomain-containing protein 8 OS=Homo sapiens OX=9606 GN=BRD8 PE=1 SV=2	1	5	5	5	5.5	135.33	337680	165430	2.04123
Q13542	Eukaryotic translation initiation factor 4E-binding protein 2	EIF4EBP2	FUNCTION: Repressor of translation initiation involved in synaptic plasticity, learning and memory formation (By similarity). Regulates EIF4E activity by preventing its assembly into the eIF4F complex: hypophosphorylated form of EIF4EBP2 competes with EIF4G1/EIF4G3 and strongly binds to EIF4E, leading to repress translation. In contrast, hyperphosphorylated form dissociates from EIF4E, allowing i…	sp|Q13542|4EBP2_HUMAN	sp|Q13542|4EBP2_HUMAN Eukaryotic translation initiation factor 4E-binding protein 2 OS=Homo sapiens OX=9606 GN=EIF4EBP2 PE=1 SV=1	1	3	3	3	49.2	12.939	229760	112590	2.04068
Q8WVK2	U4/U6.U5 small nuclear ribonucleoprotein 27 kDa protein	SNRNP27	FUNCTION: May play a role in mRNA splicing.	sp|Q8WVK2|SNR27_HUMAN	sp|Q8WVK2|SNR27_HUMAN U4/U6.U5 small nuclear ribonucleoprotein 27 kDa protein OS=Homo sapiens OX=9606 GN=SNRNP27 PE=1 SV=1	1	2	2	2	10.3	18.86	127200	62343	2.04033
Q9UBR2	Cathepsin Z	CTSZ	FUNCTION: Exhibits carboxy-monopeptidase as well as carboxy-dipeptidase activity (PubMed:10504234). Capable of producing kinin potentiating peptides (By similarity). {ECO:0000250|UniProtKB:Q9R1T3, ECO:0000269|PubMed:10504234}.	sp|Q9UBR2|CATZ_HUMAN	sp|Q9UBR2|CATZ_HUMAN Cathepsin Z OS=Homo sapiens OX=9606 GN=CTSZ PE=1 SV=1	1	8	8	8	35.6	33.868	7252600	3560000	2.03725
O75362	Zinc finger protein 217	ZNF217	FUNCTION: Binds to the promoters of target genes and functions as repressor. Promotes cell proliferation and antagonizes cell death. Promotes phosphorylation of AKT1 at 'Ser-473'. {ECO:0000269|PubMed:16203743, ECO:0000269|PubMed:16940172, ECO:0000269|PubMed:17259635, ECO:0000269|PubMed:18625718}.	sp|O75362|ZN217_HUMAN	sp|O75362|ZN217_HUMAN Zinc finger protein 217 OS=Homo sapiens OX=9606 GN=ZNF217 PE=1 SV=1	1	2	2	2	3.7	115.27	60005	29456	2.03711
Q8IVW6	AT-rich interactive domain-containing protein 3B	ARID3B	FUNCTION: Transcription factor which may be involved in neuroblastoma growth and malignant transformation. Favors nuclear targeting of ARID3A. {ECO:0000269|PubMed:16951138, ECO:0000269|PubMed:17400556}.	sp|Q8IVW6|ARI3B_HUMAN	sp|Q8IVW6|ARI3B_HUMAN AT-rich interactive domain-containing protein 3B OS=Homo sapiens OX=9606 GN=ARID3B PE=1 SV=2	1	3	3	3	8.7	60.636	120820	59310	2.03709
Q03252	Lamin-B2	LMNB2	FUNCTION: Lamins are components of the nuclear lamina, a fibrous layer on the nucleoplasmic side of the inner nuclear membrane, which is thought to provide a framework for the nuclear envelope and may also interact with chromatin.	sp|Q03252|LMNB2_HUMAN	sp|Q03252|LMNB2_HUMAN Lamin-B2 OS=Homo sapiens OX=9606 GN=LMNB2 PE=1 SV=4	1	23	19	19	37.1	69.948	1274100	625690	2.03631
P14543	Nidogen-1	NID1	FUNCTION: Sulfated glycoprotein widely distributed in basement membranes and tightly associated with laminin. Also binds to collagen IV and perlecan. It probably has a role in cell-extracellular matrix interactions.	sp|P14543|NID1_HUMAN	sp|P14543|NID1_HUMAN Nidogen-1 OS=Homo sapiens OX=9606 GN=NID1 PE=1 SV=3	1	10	10	10	13.4	136.38	688090	338100	2.03517
P78559	Microtubule-associated protein 1A	MAP1A	FUNCTION: Structural protein involved in the filamentous cross-bridging between microtubules and other skeletal elements.	sp|P78559|MAP1A_HUMAN	sp|P78559|MAP1A_HUMAN Microtubule-associated protein 1A OS=Homo sapiens OX=9606 GN=MAP1A PE=1 SV=6	1	2	1	1	1	305.48	64663	31782	2.03458
P29353	SHC-transforming protein 1	SHC1	FUNCTION: Signaling adapter that couples activated growth factor receptors to signaling pathways. Participates in a signaling cascade initiated by activated KIT and KITLG/SCF. Isoform p46Shc and isoform p52Shc, once phosphorylated, couple activated receptor tyrosine kinases to Ras via the recruitment of the GRB2/SOS complex and are implicated in the cytoplasmic propagation of mitogenic signals. I…	sp|P29353|SHC1_HUMAN	sp|P29353|SHC1_HUMAN SHC-transforming protein 1 OS=Homo sapiens OX=9606 GN=SHC1 PE=1 SV=4	1	2	2	2	6.7	62.821	280180	137740	2.03412
Q9BSM1	Polycomb group RING finger protein 1	PCGF1	FUNCTION: Component of the Polycomb group (PcG) multiprotein BCOR complex, a complex required to maintain the transcriptionally repressive state of some genes, such as BCL6 and the cyclin-dependent kinase inhibitor, CDKN1A. Transcriptional repressor that may be targeted to the DNA by BCL6; this transcription repressor activity may be related to PKC signaling pathway. Represses CDKN1A expression b…	sp|Q9BSM1|PCGF1_HUMAN	sp|Q9BSM1|PCGF1_HUMAN Polycomb group RING finger protein 1 OS=Homo sapiens OX=9606 GN=PCGF1 PE=1 SV=2	1	1	1	1	9.7	30.346	56194	27629	2.03388
Q96IZ6	tRNA N(3)-methylcytidine methyltransferase METTL2A	METTL2A	FUNCTION: S-adenosyl-L-methionine-dependent methyltransferase that mediates N(3)-methylcytidine modification of residue 32 of the tRNA anticodon loop of tRNA(Thr)(UGU) and tRNA(Arg)(CCU). {ECO:0000269|PubMed:28655767}.	sp|Q96IZ6|MET2A_HUMAN	sp|Q96IZ6|MET2A_HUMAN tRNA N(3)-methylcytidine methyltransferase METTL2A OS=Homo sapiens OX=9606 GN=METTL2A PE=1 SV=5	1	4	4	1	15.6	43.537	295840	145490	2.0334
Q8TEA8	D-aminoacyl-tRNA deacylase 1	DTD1	FUNCTION: Possible ATPase (PubMed:15653697) involved in DNA replication, may facilitate loading of CDC45 onto pre-replication complexes (PubMed:20065034). {ECO:0000269|PubMed:15653697, ECO:0000269|PubMed:20065034}.; FUNCTION: An aminoacyl-tRNA editing enzyme that deacylates mischarged D-aminoacyl-tRNAs. Also deacylates mischarged glycyl-tRNA(Ala), protecting cells against glycine mischarging by A…	sp|Q8TEA8|DTD1_HUMAN	sp|Q8TEA8|DTD1_HUMAN D-aminoacyl-tRNA deacylase 1 OS=Homo sapiens OX=9606 GN=DTD1 PE=1 SV=2	1	4	4	4	20.6	23.423	832040	409370	2.03249
Q86SZ2	Trafficking protein particle complex subunit 6B	TRAPPC6B	FUNCTION: Component of a transport protein particle (TRAPP) complex that may function in specific stages of inter-organelle traffic (PubMed:16025134, PubMed:16828797). Specifically involved in the early development of neural circuitry, likely by controlling the frequency and amplitude of intracellular calcium transients implicated in the regulation of neuron differentiation and survival (Probable…	sp|Q86SZ2|TPC6B_HUMAN	sp|Q86SZ2|TPC6B_HUMAN Trafficking protein particle complex subunit 6B OS=Homo sapiens OX=9606 GN=TRAPPC6B PE=1 SV=1	1	1	1	1	8.2	17.983	84957	41924	2.02645
P22531	Small proline-rich protein 2E	SPRR2E	FUNCTION: Cross-linked envelope protein of keratinocytes. It is a keratinocyte protein that first appears in the cell cytosol, but ultimately becomes cross-linked to membrane proteins by transglutaminase. All that results in the formation of an insoluble envelope beneath the plasma membrane.	sp|P22531|SPR2E_HUMAN;sp|Q96RM1|SPR2F_HUMAN	sp|P22531|SPR2E_HUMAN Small proline-rich protein 2E OS=Homo sapiens OX=9606 GN=SPRR2E PE=2 SV=2;sp|Q96RM1|SPR2F_HUMAN Small proline-rich protein 2F OS=Homo sapiens OX=9606 GN=SPRR2F PE=3 SV=1	2	4	4	1	79.2	7.8553	20629	10201	2.02225
O94898	Leucine-rich repeats and immunoglobulin-like domains protein 2	LRIG2		sp|O94898|LRIG2_HUMAN	sp|O94898|LRIG2_HUMAN Leucine-rich repeats and immunoglobulin-like domains protein 2 OS=Homo sapiens OX=9606 GN=LRIG2 PE=1 SV=3	1	2	2	2	3.7	118.96	112470	55645	2.02121
Q9BSA9	Endosomal/lysosomal proton channel TMEM175	TMEM175	FUNCTION: Organelle-specific potassium channel specifically responsible for potassium conductance in endosomes and lysosomes. Forms a potassium-permeable leak-like channel, which regulates lumenal pH stability and is required for autophagosome-lysosome fusion. Constitutes the major lysosomal potassium channel. {ECO:0000269|PubMed:26317472, ECO:0000269|PubMed:28723891}.	sp|Q9BSA9|TM175_HUMAN	sp|Q9BSA9|TM175_HUMAN Endosomal/lysosomal proton channel TMEM175 OS=Homo sapiens OX=9606 GN=TMEM175 PE=1 SV=1	1	1	1	1	2.6	55.614	30311	15013	2.01898
Q9H4L7	SWI/SNF-related matrix-associated actin-dependent regulator of chromatin subfamily A containing DEAD/H box 1	SMARCAD1	FUNCTION: DNA helicase that possesses intrinsic ATP-dependent nucleosome-remodeling activity and is both required for DNA repair and heterochromatin organization. Promotes DNA end resection of double-strand breaks (DSBs) following DNA damage: probably acts by weakening histone DNA interactions in nucleosomes flanking DSBs. Required for the restoration of heterochromatin organization after replica…	sp|Q9H4L7|SMRCD_HUMAN	sp|Q9H4L7|SMRCD_HUMAN SWI/SNF-related matrix-associated actin-dependent regulator of chromatin subfamily A containing DEAD/H box 1 OS=Homo sapiens OX=9606 GN=SMARCAD1 PE=1 SV=2	1	5	5	5	6.8	117.4	300140	148840	2.01653
O95755	Ras-related protein Rab-36	RAB36	FUNCTION: Protein transport. Probably involved in vesicular traffic (By similarity). {ECO:0000250}.	sp|O95755|RAB36_HUMAN	sp|O95755|RAB36_HUMAN Ras-related protein Rab-36 OS=Homo sapiens OX=9606 GN=RAB36 PE=1 SV=2	1	1	1	1	3.9	36.322	14878	7385.1	2.0146
Q9NUM3	Zinc transporter ZIP9	SLC39A9	FUNCTION: May act as a zinc-influx transporter. {ECO:0000250}.	sp|Q9NUM3|S39A9_HUMAN	sp|Q9NUM3|S39A9_HUMAN Zinc transporter ZIP9 OS=Homo sapiens OX=9606 GN=SLC39A9 PE=1 SV=2	1	1	1	1	4.9	32.251	143940	71566	2.01129
Q96PV6	Leukocyte receptor cluster member 8	LENG8		sp|Q96PV6|LENG8_HUMAN	sp|Q96PV6|LENG8_HUMAN Leukocyte receptor cluster member 8 OS=Homo sapiens OX=9606 GN=LENG8 PE=1 SV=3	1	11	11	11	20	88.156	1354900	673650	2.01128
Q8NCE0	tRNA-splicing endonuclease subunit Sen2	TSEN2	FUNCTION: Constitutes one of the two catalytic subunit of the tRNA-splicing endonuclease complex, a complex responsible for identification and cleavage of the splice sites in pre-tRNA. It cleaves pre-tRNA at the 5'- and 3'-splice sites to release the intron. The products are an intron and two tRNA half-molecules bearing 2',3'-cyclic phosphate and 5'-OH termini. There are no conserved sequences at…	sp|Q8NCE0|SEN2_HUMAN	sp|Q8NCE0|SEN2_HUMAN tRNA-splicing endonuclease subunit Sen2 OS=Homo sapiens OX=9606 GN=TSEN2 PE=1 SV=2	1	3	3	3	8.8	53.246	160280	79752	2.00973
P60852	Zona pellucida sperm-binding protein 1	ZP1	FUNCTION: Component of the zona pellucida, an extracellular matrix surrounding oocytes which mediates sperm binding, induction of the acrosome reaction and prevents post-fertilization polyspermy. The zona pellucida is composed of 3 to 4 glycoproteins, ZP1, ZP2, ZP3, and ZP4. ZP1 ensures the structural integrity of the zona pellucida.	sp|P60852|ZP1_HUMAN	sp|P60852|ZP1_HUMAN Zona pellucida sperm-binding protein 1 OS=Homo sapiens OX=9606 GN=ZP1 PE=1 SV=1	1	1	1	1	1.9	70.049	59381	29572	2.00801
Q9H115	Beta-soluble NSF attachment protein	NAPB	FUNCTION: Required for vesicular transport between the endoplasmic reticulum and the Golgi apparatus. {ECO:0000250}.	sp|Q9H115|SNAB_HUMAN	sp|Q9H115|SNAB_HUMAN Beta-soluble NSF attachment protein OS=Homo sapiens OX=9606 GN=NAPB PE=1 SV=2	1	4	1	1	15.1	33.557	335750	167400	2.00568
Q9BXS4	Transmembrane protein 59	TMEM59	FUNCTION: Acts as a regulator of autophagy in response to S.aureus infection by promoting activation of LC3 (MAP1LC3A, MAP1LC3B or MAP1LC3C). Acts by interacting with ATG16L1, leading to promote a functional complex between LC3 and ATG16L1 and promoting LC3 lipidation and subsequent activation of autophagy (PubMed:27273576, PubMed:23376921). Modulates the O-glycosylation and complex N-glycosylati…	sp|Q9BXS4|TMM59_HUMAN	sp|Q9BXS4|TMM59_HUMAN Transmembrane protein 59 OS=Homo sapiens OX=9606 GN=TMEM59 PE=1 SV=1	1	1	1	1	4.6	36.223	47065	23471	2.00524
Q9H410	Kinetochore-associated protein DSN1 homolog	DSN1	FUNCTION: Part of the MIS12 complex which is required for normal chromosome alignment and segregation and kinetochore formation during mitosis. {ECO:0000269|PubMed:15502821, ECO:0000269|PubMed:16585270}.	sp|Q9H410|DSN1_HUMAN	sp|Q9H410|DSN1_HUMAN Kinetochore-associated protein DSN1 homolog OS=Homo sapiens OX=9606 GN=DSN1 PE=1 SV=2	1	5	5	5	20.5	40.067	644910	322000	2.00283
Q96M27	Protein PRRC1	PRRC1		sp|Q96M27|PRRC1_HUMAN	sp|Q96M27|PRRC1_HUMAN Protein PRRC1 OS=Homo sapiens OX=9606 GN=PRRC1 PE=1 SV=1	1	3	3	3	10.3	46.701	1028400	513480	2.0028
P51970	NADH dehydrogenase [ubiquinone] 1 alpha subcomplex subunit 8	NDUFA8	FUNCTION: Accessory subunit of the mitochondrial membrane respiratory chain NADH dehydrogenase (Complex I), that is believed not to be involved in catalysis. Complex I functions in the transfer of electrons from NADH to the respiratory chain. The immediate electron acceptor for the enzyme is believed to be ubiquinone. {ECO:0000269|PubMed:27626371}.	sp|P51970|NDUA8_HUMAN	sp|P51970|NDUA8_HUMAN NADH dehydrogenase [ubiquinone] 1 alpha subcomplex subunit 8 OS=Homo sapiens OX=9606 GN=NDUFA8 PE=1 SV=3	1	10	10	10	69.2	20.105	5467600	2730200	2.00264
Q8WZ79	Deoxyribonuclease-2-beta	DNASE2B	FUNCTION: Hydrolyzes DNA under acidic conditions. Does not require divalent cations for activity. Participates in the degradation of nuclear DNA during lens cell differentiation. {ECO:0000269|PubMed:11700027, ECO:0000269|PubMed:12944971}.	sp|Q8WZ79|DNS2B_HUMAN	sp|Q8WZ79|DNS2B_HUMAN Deoxyribonuclease-2-beta OS=Homo sapiens OX=9606 GN=DNASE2B PE=2 SV=1	1	1	1	1	3.3	41.712	38505	19268	1.99839
Q9BTE6	Alanyl-tRNA editing protein Aarsd1	AARSD1	FUNCTION: Functions in trans to edit the amino acid moiety from incorrectly charged tRNA(Ala). {ECO:0000250}.	sp|Q9BTE6|AASD1_HUMAN	sp|Q9BTE6|AASD1_HUMAN Alanyl-tRNA editing protein Aarsd1 OS=Homo sapiens OX=9606 GN=AARSD1 PE=1 SV=2	1	3	3	3	18	45.479	157860	79253	1.99185
P36969	Phospholipid hydroperoxide glutathione peroxidase	GPX4	FUNCTION: Essential antioxidant peroxidase that directly reduces phospholipid hydroperoxide even if they are incorporated in membranes and lipoproteins (By similarity). Can also reduce fatty acid hydroperoxide, cholesterol hydroperoxide and thymine hydroperoxide (By similarity). Plays a key role in protecting cells from oxidative damage by preventing membrane lipid peroxidation (By similarity). R…	sp|P36969|GPX4_HUMAN	sp|P36969|GPX4_HUMAN Phospholipid hydroperoxide glutathione peroxidase OS=Homo sapiens OX=9606 GN=GPX4 PE=1 SV=3	1	5	5	5	29.9	22.174	1617300	811980	1.9918
Q9NQ50	39S ribosomal protein L40, mitochondrial	MRPL40		sp|Q9NQ50|RM40_HUMAN	sp|Q9NQ50|RM40_HUMAN 39S ribosomal protein L40, mitochondrial OS=Homo sapiens OX=9606 GN=MRPL40 PE=1 SV=1	1	4	4	4	29.6	24.49	1145300	575040	1.99169
Q15059	Bromodomain-containing protein 3	BRD3	FUNCTION: Chromatin reader that recognizes and binds hyperacetylated chromatin and plays a role in the regulation of transcription, probably by chromatin remodeling and interaction with transcription factors (PubMed:18406326, PubMed:27105114). Regulates transcription by promoting the binding of the transcription factor GATA1 to its targets (By similarity). {ECO:0000250|UniProtKB:Q8K2F0, ECO:00002…	sp|Q15059|BRD3_HUMAN	sp|Q15059|BRD3_HUMAN Bromodomain-containing protein 3 OS=Homo sapiens OX=9606 GN=BRD3 PE=1 SV=1	1	14	13	11	28.8	79.541	2477200	1244200	1.991
Q9HA77	Probable cysteine--tRNA ligase, mitochondrial	CARS2		sp|Q9HA77|SYCM_HUMAN	sp|Q9HA77|SYCM_HUMAN Probable cysteine--tRNA ligase, mitochondrial OS=Homo sapiens OX=9606 GN=CARS2 PE=1 SV=1	1	9	9	9	18.8	62.223	3030900	1524700	1.98787
Q92522	Histone H1.10	H1-10	FUNCTION: Histones H1 are necessary for the condensation of nucleosome chains into higher-order structures.	sp|Q92522|H1X_HUMAN	sp|Q92522|H1X_HUMAN Histone H1.10 OS=Homo sapiens OX=9606 GN=H1-10 PE=1 SV=1	1	7	7	7	31.9	22.487	4985000	2509600	1.98637
Q8IUS5	Epoxide hydrolase 4	EPHX4		sp|Q8IUS5|EPHX4_HUMAN	sp|Q8IUS5|EPHX4_HUMAN Epoxide hydrolase 4 OS=Homo sapiens OX=9606 GN=EPHX4 PE=1 SV=2	1	2	2	2	8.3	42.324	165350	83258	1.986
Q99952	Tyrosine-protein phosphatase non-receptor type 18	PTPN18	FUNCTION: Differentially dephosphorylate autophosphorylated tyrosine kinases which are known to be overexpressed in tumor tissues.	sp|Q99952|PTN18_HUMAN	sp|Q99952|PTN18_HUMAN Tyrosine-protein phosphatase non-receptor type 18 OS=Homo sapiens OX=9606 GN=PTPN18 PE=1 SV=2	1	1	1	1	4.6	50.482	16005	8059	1.98598
Q9UN81	LINE-1 retrotransposable element ORF1 protein	L1RE1	FUNCTION: Nucleic acid-binding protein which is essential for retrotransposition of LINE-1 elements in the genome. Functions as a nucleic acid chaperone binding its own transcript and therefore preferentially mobilizing the transcript from which they are encoded. {ECO:0000269|PubMed:11158327, ECO:0000269|PubMed:21937507, ECO:0000269|PubMed:28806172, ECO:0000269|PubMed:30122351, ECO:0000269|PubMed…	sp|Q9UN81|LORF1_HUMAN	sp|Q9UN81|LORF1_HUMAN LINE-1 retrotransposable element ORF1 protein OS=Homo sapiens OX=9606 GN=L1RE1 PE=1 SV=1	1	1	1	1	3.8	40.055	41104	20719	1.98388
Q9NPF5	DNA methyltransferase 1-associated protein 1	DMAP1	FUNCTION: Involved in transcription repression and activation. Its interaction with HDAC2 may provide a mechanism for histone deacetylation in heterochromatin following replication of DNA at late firing origins. Can also repress transcription independently of histone deacetylase activity. May specifically potentiate DAXX-mediated repression of glucocorticoid receptor-dependent transcription. Comp…	sp|Q9NPF5|DMAP1_HUMAN	sp|Q9NPF5|DMAP1_HUMAN DNA methyltransferase 1-associated protein 1 OS=Homo sapiens OX=9606 GN=DMAP1 PE=1 SV=1	1	6	6	6	18.4	52.992	195190	98433	1.98297
Q9NVS2	39S ribosomal protein S18a, mitochondrial	MRPS18A		sp|Q9NVS2|RT18A_HUMAN	sp|Q9NVS2|RT18A_HUMAN 39S ribosomal protein S18a, mitochondrial OS=Homo sapiens OX=9606 GN=MRPS18A PE=1 SV=1	1	4	4	4	19.4	22.184	2465900	1244700	1.98112
Q6ZN57	Zinc finger protein ZFP2	ZFP2	FUNCTION: Probable transcription factor involved in neuronal differentiation and/or phenotypic maintenance. {ECO:0000250}.	sp|Q6ZN57|ZFP2_HUMAN	sp|Q6ZN57|ZFP2_HUMAN Zinc finger protein ZFP2 OS=Homo sapiens OX=9606 GN=ZFP2 PE=1 SV=1	1	2	2	1	6.5	52.74	62161	31462	1.97575
P62070	Ras-related protein R-Ras2	RRAS2	FUNCTION: GTP-binding protein with GTPase activity involved in the regulation of MAPK signaling pathway, thereby controlling multiple cellular processes (PubMed:31130282). Involved in the regulation of MAPK signaling pathway (PubMed:31130282, PubMed:31130285). Regulation of craniofacial development (PubMed:31130282, PubMed:31130285). {ECO:0000269|PubMed:31130282, ECO:0000269|PubMed:31130285}.	sp|P62070|RRAS2_HUMAN	sp|P62070|RRAS2_HUMAN Ras-related protein R-Ras2 OS=Homo sapiens OX=9606 GN=RRAS2 PE=1 SV=1	1	6	6	5	33.8	23.399	1030200	521700	1.9747
Q6ZUT9	DENN domain-containing protein 5B	DENND5B	FUNCTION: Guanine nucleotide exchange factor (GEF) which may activate RAB39A and/or RAB39B. Promotes the exchange of GDP to GTP, converting inactive GDP-bound Rab proteins into their active GTP-bound form. {ECO:0000269|PubMed:20937701}.	sp|Q6ZUT9|DEN5B_HUMAN	sp|Q6ZUT9|DEN5B_HUMAN DENN domain-containing protein 5B OS=Homo sapiens OX=9606 GN=DENND5B PE=1 SV=2	1	2	2	2	2.6	145.02	65992	33419	1.97469
Q9BWE0	Replication initiator 1	REPIN1	FUNCTION: Sequence-specific double-stranded DNA-binding protein required for initiation of chromosomal DNA replication. Binds on 5'-ATT-3' reiterated sequences downstream of the origin of bidirectional replication (OBR) and a second, homologous ATT sequence of opposite orientation situated within the OBR zone. Facilitates DNA bending.	sp|Q9BWE0|REPI1_HUMAN	sp|Q9BWE0|REPI1_HUMAN Replication initiator 1 OS=Homo sapiens OX=9606 GN=REPIN1 PE=1 SV=1	1	1	1	1	2.8	63.574	90848	46015	1.97431
Q9UPW0	Forkhead box protein J3	FOXJ3	FUNCTION: Transcriptional activator of MEF2C involved in the regulation pf adult muscle fiber type identity and skeletal muscle regeneration. {ECO:0000250|UniProtKB:Q8BUR3}.	sp|Q9UPW0|FOXJ3_HUMAN	sp|Q9UPW0|FOXJ3_HUMAN Forkhead box protein J3 OS=Homo sapiens OX=9606 GN=FOXJ3 PE=1 SV=2	1	2	2	2	4.7	68.96	44185	22392	1.97325
Q8TEV9	Guanine nucleotide exchange protein SMCR8	SMCR8	FUNCTION: Component of the C9orf72-SMCR8 complex, a complex that has guanine nucleotide exchange factor (GEF) activity and regulates autophagy (PubMed:20562859, PubMed:27193190, PubMed:27103069, PubMed:27559131, PubMed:27617292, PubMed:28195531). In the complex, C9orf72 and SMCR8 probably constitute the catalytic subunits that promote the exchange of GDP to GTP, converting inactive GDP-bound RAB8…	sp|Q8TEV9|SMCR8_HUMAN	sp|Q8TEV9|SMCR8_HUMAN Guanine nucleotide exchange protein SMCR8 OS=Homo sapiens OX=9606 GN=SMCR8 PE=1 SV=2	1	3	3	3	3.6	105.02	78083	39584	1.97259
P49841	Glycogen synthase kinase-3 beta	GSK3B	FUNCTION: Constitutively active protein kinase that acts as a negative regulator in the hormonal control of glucose homeostasis, Wnt signaling and regulation of transcription factors and microtubules, by phosphorylating and inactivating glycogen synthase (GYS1 or GYS2), EIF2B, CTNNB1/beta-catenin, APC, AXIN1, DPYSL2/CRMP2, JUN, NFATC1/NFATC, MAPT/TAU and MACF1. Requires primed phosphorylation of …	sp|P49841|GSK3B_HUMAN	sp|P49841|GSK3B_HUMAN Glycogen synthase kinase-3 beta OS=Homo sapiens OX=9606 GN=GSK3B PE=1 SV=2	1	7	6	6	28.1	46.744	296390	150400	1.97068
P51553	Isocitrate dehydrogenase [NAD] subunit gamma, mitochondrial	IDH3G	FUNCTION: Regulatory subunit which plays a role in the allosteric regulation of the enzyme catalyzing the decarboxylation of isocitrate (ICT) into alpha-ketoglutarate. The heterodimer composed of the alpha (IDH3A) and beta (IDH3B) subunits and the heterodimer composed of the alpha (IDH3A) and gamma (IDH3G) subunits, have considerable basal activity but the full activity of the heterotetramer (con…	sp|P51553|IDH3G_HUMAN	sp|P51553|IDH3G_HUMAN Isocitrate dehydrogenase [NAD] subunit gamma, mitochondrial OS=Homo sapiens OX=9606 GN=IDH3G PE=1 SV=1	1	10	10	10	39.2	42.794	4902100	2490900	1.968
Q8IZ21	Phosphatase and actin regulator 4	PHACTR4	FUNCTION: Regulator of protein phosphatase 1 (PP1) required for neural tube and optic fissure closure, and enteric neural crest cell (ENCCs) migration during development. Acts as an activator of PP1 by interacting with PPP1CA and preventing phosphorylation of PPP1CA at 'Thr-320'. During neural tube closure, localizes to the ventral neural tube and activates PP1, leading to down-regulate cell prol…	sp|Q8IZ21|PHAR4_HUMAN	sp|Q8IZ21|PHAR4_HUMAN Phosphatase and actin regulator 4 OS=Homo sapiens OX=9606 GN=PHACTR4 PE=1 SV=1	1	5	5	5	10.8	78.21	218510	111040	1.96785
P09525	Annexin A4	ANXA4	FUNCTION: Calcium/phospholipid-binding protein which promotes membrane fusion and is involved in exocytosis. {ECO:0000250}.	sp|P09525|ANXA4_HUMAN	sp|P09525|ANXA4_HUMAN Annexin A4 OS=Homo sapiens OX=9606 GN=ANXA4 PE=1 SV=4	1	7	7	7	18.8	35.882	1532200	778880	1.96718
O75940	Survival of motor neuron-related-splicing factor 30	SMNDC1	FUNCTION: Necessary for spliceosome assembly. Overexpression causes apoptosis. {ECO:0000269|PubMed:11331295, ECO:0000269|PubMed:11331595, ECO:0000269|PubMed:9817934}.	sp|O75940|SPF30_HUMAN	sp|O75940|SPF30_HUMAN Survival of motor neuron-related-splicing factor 30 OS=Homo sapiens OX=9606 GN=SMNDC1 PE=1 SV=1	1	5	5	5	34	26.711	1375800	700920	1.96285
Q04656	Copper-transporting ATPase 1	ATP7A	FUNCTION: May supply copper to copper-requiring proteins within the secretory pathway, when localized in the trans-Golgi network. Under conditions of elevated extracellular copper, it relocalized to the plasma membrane where it functions in the efflux of copper from cells.	sp|Q04656|ATP7A_HUMAN	sp|Q04656|ATP7A_HUMAN Copper-transporting ATPase 1 OS=Homo sapiens OX=9606 GN=ATP7A PE=1 SV=4	1	11	11	11	10.2	163.37	1102400	562070	1.96132
O94874	E3 UFM1-protein ligase 1	UFL1	FUNCTION: E3 protein ligase that mediates ufmylation, the covalent attachment of the ubiquitin-like modifier UFM1 to substrate proteins, a post-translational modification on lysine residues of proteins that may play a crucial role in a number of cellular processes. Mediates DDRGK1 ufmylation and may regulate the proteasomal degradation of DDRGK1 and CDK5RAP3 thereby modulating NF-kappa-B signalin…	sp|O94874|UFL1_HUMAN	sp|O94874|UFL1_HUMAN E3 UFM1-protein ligase 1 OS=Homo sapiens OX=9606 GN=UFL1 PE=1 SV=2	1	22	22	22	32.7	89.594	7573100	3871900	1.95591
O60499	Syntaxin-10	STX10	FUNCTION: SNARE involved in vesicular transport from the late endosomes to the trans-Golgi network. {ECO:0000269|PubMed:18195106}.	sp|O60499|STX10_HUMAN	sp|O60499|STX10_HUMAN Syntaxin-10 OS=Homo sapiens OX=9606 GN=STX10 PE=1 SV=1	1	4	4	4	21.7	28.114	412620	211000	1.95555
Q9NQ66	1-phosphatidylinositol 4,5-bisphosphate phosphodiesterase beta-1	PLCB1	FUNCTION: The production of the second messenger molecules diacylglycerol (DAG) and inositol 1,4,5-trisphosphate (IP3) is mediated by activated phosphatidylinositol-specific phospholipase C enzymes.	sp|Q9NQ66|PLCB1_HUMAN	sp|Q9NQ66|PLCB1_HUMAN 1-phosphatidylinositol 4,5-bisphosphate phosphodiesterase beta-1 OS=Homo sapiens OX=9606 GN=PLCB1 PE=1 SV=1	1	3	3	3	4.3	138.57	121470	62126	1.95522
P24723	Protein kinase C eta type	PRKCH	FUNCTION: Calcium-independent, phospholipid- and diacylglycerol (DAG)-dependent serine/threonine-protein kinase that is involved in the regulation of cell differentiation in keratinocytes and pre-B cell receptor, mediates regulation of epithelial tight junction integrity and foam cell formation, and is required for glioblastoma proliferation and apoptosis prevention in MCF-7 cells. In keratinocyt…	sp|P24723|KPCL_HUMAN;sp|Q02156|KPCE_HUMAN	sp|P24723|KPCL_HUMAN Protein kinase C eta type OS=Homo sapiens OX=9606 GN=PRKCH PE=1 SV=4;sp|Q02156|KPCE_HUMAN Protein kinase C epsilon type OS=Homo sapiens OX=9606 GN=PRKCE PE=1 SV=1	2	1	1	1	2	77.828	44846	22956	1.95356
Q9BUR4	Telomerase Cajal body protein 1	WRAP53	FUNCTION: RNA chaperone that plays a key role in telomere maintenance and RNA localization to Cajal bodies (PubMed:29804836, PubMed:29695869). Specifically recognizes and binds the Cajal body box (CAB box) present in both small Cajal body RNAs (scaRNAs) and telomerase RNA template component (TERC) (PubMed:19285445, PubMed:20351177, PubMed:29804836, PubMed:29695869). Essential component of the tel…	sp|Q9BUR4|TCAB1_HUMAN	sp|Q9BUR4|TCAB1_HUMAN Telomerase Cajal body protein 1 OS=Homo sapiens OX=9606 GN=WRAP53 PE=1 SV=1	1	5	5	5	19	59.309	331000	169550	1.95223
P61758	Prefoldin subunit 3	VBP1	FUNCTION: Binds specifically to cytosolic chaperonin (c-CPN) and transfers target proteins to it. Binds to nascent polypeptide chain and promotes folding in an environment in which there are many competing pathways for nonnative proteins. {ECO:0000269|PubMed:9630229}.	sp|P61758|PFD3_HUMAN	sp|P61758|PFD3_HUMAN Prefoldin subunit 3 OS=Homo sapiens OX=9606 GN=VBP1 PE=1 SV=4	1	5	5	5	19.8	22.626	1721000	881830	1.95162
Q9HAH7	Probable fibrosin-1	FBRS		sp|Q9HAH7|FBRS_HUMAN	sp|Q9HAH7|FBRS_HUMAN Probable fibrosin-1 OS=Homo sapiens OX=9606 GN=FBRS PE=1 SV=3	1	2	2	2	7	48.388	124890	64035	1.95034
Q9H7E2	Tudor domain-containing protein 3	TDRD3	FUNCTION: Scaffolding protein that specifically recognizes and binds dimethylarginine-containing proteins. In nucleus, acts as a coactivator: recognizes and binds asymmetric dimethylation on the core histone tails associated with transcriptional activation (H3R17me2a and H4R3me2a) and recruits proteins at these arginine-methylated loci. In cytoplasm, may play a role in the assembly and/or disasse…	sp|Q9H7E2|TDRD3_HUMAN	sp|Q9H7E2|TDRD3_HUMAN Tudor domain-containing protein 3 OS=Homo sapiens OX=9606 GN=TDRD3 PE=1 SV=1	1	5	5	5	11.5	73.184	189970	97543	1.94755
O60503	Adenylate cyclase type 9	ADCY9	FUNCTION: Adenylyl cyclase that catalyzes the formation of the signaling molecule cAMP in response to activation of G protein-coupled receptors (PubMed:9628827, PubMed:12972952, PubMed:15879435, PubMed:10987815). Contributes to signaling cascades activated by CRH (corticotropin-releasing factor), corticosteroids and beta-adrenergic receptors (PubMed:9628827). {ECO:0000269|PubMed:10987815, ECO:000…	sp|O60503|ADCY9_HUMAN	sp|O60503|ADCY9_HUMAN Adenylate cyclase type 9 OS=Homo sapiens OX=9606 GN=ADCY9 PE=1 SV=4	1	2	2	2	2.7	150.7	98607	50684	1.94553
Q16513	Serine/threonine-protein kinase N2	PKN2	FUNCTION: PKC-related serine/threonine-protein kinase and Rho/Rac effector protein that participates in specific signal transduction responses in the cell. Plays a role in the regulation of cell cycle progression, actin cytoskeleton assembly, cell migration, cell adhesion, tumor cell invasion and transcription activation signaling processes. Phosphorylates CTTN in hyaluronan-induced astrocytes an…	sp|Q16513|PKN2_HUMAN	sp|Q16513|PKN2_HUMAN Serine/threonine-protein kinase N2 OS=Homo sapiens OX=9606 GN=PKN2 PE=1 SV=1	1	19	19	19	27.7	112.03	2537600	1304600	1.94512
Q8NHV4	Protein NEDD1	NEDD1	FUNCTION: Required for mitosis progression. Promotes the nucleation of microtubules from the spindle. {ECO:0000269|PubMed:19029337, ECO:0000269|PubMed:19509060}.	sp|Q8NHV4|NEDD1_HUMAN	sp|Q8NHV4|NEDD1_HUMAN Protein NEDD1 OS=Homo sapiens OX=9606 GN=NEDD1 PE=1 SV=1	1	6	6	6	18.2	71.965	887810	456520	1.94473
Q99543	DnaJ homolog subfamily C member 2	DNAJC2	FUNCTION: Acts both as a chaperone in the cytosol and as a chromatin regulator in the nucleus. When cytosolic, acts as a molecular chaperone: component of the ribosome-associated complex (RAC), a complex involved in folding or maintaining nascent polypeptides in a folding-competent state. In the RAC complex, stimulates the ATPase activity of the ribosome-associated pool of Hsp70-type chaperones H…	sp|Q99543|DNJC2_HUMAN	sp|Q99543|DNJC2_HUMAN DnaJ homolog subfamily C member 2 OS=Homo sapiens OX=9606 GN=DNAJC2 PE=1 SV=4	1	9	9	9	19.5	71.996	1125800	578970	1.94449
Q5VV42	Threonylcarbamoyladenosine tRNA methylthiotransferase	CDKAL1	FUNCTION: Catalyzes the methylthiolation of N6-threonylcarbamoyladenosine (t(6)A), leading to the formation of 2-methylthio-N6-threonylcarbamoyladenosine (ms(2)t(6)A) at position 37 in tRNAs that read codons beginning with adenine. {ECO:0000250|UniProtKB:Q91WE6}.	sp|Q5VV42|CDKAL_HUMAN	sp|Q5VV42|CDKAL_HUMAN Threonylcarbamoyladenosine tRNA methylthiotransferase OS=Homo sapiens OX=9606 GN=CDKAL1 PE=1 SV=1	1	8	8	8	19	65.111	1328900	683520	1.9442
Q14592	Zinc finger protein 460	ZNF460	FUNCTION: May be involved in transcriptional regulation.	sp|Q14592|ZN460_HUMAN	sp|Q14592|ZN460_HUMAN Zinc finger protein 460 OS=Homo sapiens OX=9606 GN=ZNF460 PE=1 SV=2	1	1	1	1	2.3	63.664	45676	23505	1.94325
Q13308	Inactive tyrosine-protein kinase 7	PTK7	FUNCTION: Inactive tyrosine kinase involved in Wnt signaling pathway. Component of both the non-canonical (also known as the Wnt/planar cell polarity signaling) and the canonical Wnt signaling pathway. Functions in cell adhesion, cell migration, cell polarity, proliferation, actin cytoskeleton reorganization and apoptosis. Has a role in embryogenesis, epithelial tissue organization and angiogenes…	sp|Q13308|PTK7_HUMAN	sp|Q13308|PTK7_HUMAN Inactive tyrosine-protein kinase 7 OS=Homo sapiens OX=9606 GN=PTK7 PE=1 SV=2	1	25	25	25	37.6	118.39	8426800	4338700	1.94224
Q08AM6	Protein VAC14 homolog	VAC14	FUNCTION: The PI(3,5)P2 regulatory complex regulates both the synthesis and turnover of phosphatidylinositol 3,5-bisphosphate (PtdIns(3,5)P2). Acts as a positive activator of PIKfyve kinase activity. Also required to maintain normal levels of phosphatidylinositol 3-phosphate (PtdIns(3)P) and phosphatidylinositol 5-phosphate (PtdIns(5)P). Plays a role in the biogenesis of endosome carrier vesicles…	sp|Q08AM6|VAC14_HUMAN	sp|Q08AM6|VAC14_HUMAN Protein VAC14 homolog OS=Homo sapiens OX=9606 GN=VAC14 PE=1 SV=1	1	7	7	7	10.9	87.972	872180	449100	1.94206
Q14554	Protein disulfide-isomerase A5	PDIA5		sp|Q14554|PDIA5_HUMAN	sp|Q14554|PDIA5_HUMAN Protein disulfide-isomerase A5 OS=Homo sapiens OX=9606 GN=PDIA5 PE=1 SV=1	1	11	11	11	29.1	59.594	2703300	1394600	1.93841
Q9NVA1	Ubiquinol-cytochrome-c reductase complex assembly factor 1	UQCC1	FUNCTION: Required for the assembly of the ubiquinol-cytochrome c reductase complex (mitochondrial respiratory chain complex III or cytochrome b-c1 complex). Involved in cytochrome b translation and/or stability. {ECO:0000269|PubMed:24385928}.	sp|Q9NVA1|UQCC1_HUMAN	sp|Q9NVA1|UQCC1_HUMAN Ubiquinol-cytochrome-c reductase complex assembly factor 1 OS=Homo sapiens OX=9606 GN=UQCC1 PE=1 SV=3	1	5	5	5	20.7	34.6	1621300	836890	1.93729
Q6UX71	Plexin domain-containing protein 2	PLXDC2	FUNCTION: May play a role in tumor angiogenesis. {ECO:0000269|PubMed:11559528}.	sp|Q6UX71|PXDC2_HUMAN	sp|Q6UX71|PXDC2_HUMAN Plexin domain-containing protein 2 OS=Homo sapiens OX=9606 GN=PLXDC2 PE=1 SV=1	1	2	2	2	5.5	59.582	151590	78270	1.93676
Q9UII4	E3 ISG15--protein ligase HERC5	HERC5	FUNCTION: Major E3 ligase for ISG15 conjugation. Acts as a positive regulator of innate antiviral response in cells induced by interferon. Functions as part of the ISGylation machinery that recognizes target proteins in a broad and relatively non-specific manner. Catalyzes ISGylation of IRF3 which results in sustained activation, it attenuates IRF3-PIN1 interaction, which antagonizes IRF3 ubiquit…	sp|Q9UII4|HERC5_HUMAN	sp|Q9UII4|HERC5_HUMAN E3 ISG15--protein ligase HERC5 OS=Homo sapiens OX=9606 GN=HERC5 PE=1 SV=2	1	7	7	7	11.9	116.85	371910	192160	1.93542
P51654	Glypican-3	GPC3	FUNCTION: Cell surface proteoglycan that bears heparan sulfate (PubMed:14610063). Negatively regulates the hedgehog signaling pathway when attached via the GPI-anchor to the cell surface by competing with the hedgehog receptor PTC1 for binding to hedgehog proteins (By similarity). Binding to the hedgehog protein SHH triggers internalization of the complex by endocytosis and its subsequent lysosom…	sp|P51654|GPC3_HUMAN	sp|P51654|GPC3_HUMAN Glypican-3 OS=Homo sapiens OX=9606 GN=GPC3 PE=1 SV=1	1	2	2	2	5.3	65.562	266780	137860	1.93515
Q96KC2	ADP-ribosylation factor-like protein 5B	ARL5B	FUNCTION: Binds and exchanges GTP and GDP.	sp|Q96KC2|ARL5B_HUMAN;sp|Q9Y689|ARL5A_HUMAN	sp|Q96KC2|ARL5B_HUMAN ADP-ribosylation factor-like protein 5B OS=Homo sapiens OX=9606 GN=ARL5B PE=1 SV=1;sp|Q9Y689|ARL5A_HUMAN ADP-ribosylation factor-like protein 5A OS=Homo sapiens OX=9606 GN=ARL5A PE=1 SV=1	2	2	2	2	13.4	20.374	87994	45482	1.9347
O00625	Pirin	PIR	FUNCTION: Transcriptional coregulator of NF-kappa-B which facilitates binding of NF-kappa-B proteins to target kappa-B genes in a redox-state-dependent manner. May be required for efficient terminal myeloid maturation of hematopoietic cells. Has quercetin 2,3-dioxygenase activity (in vitro). {ECO:0000269|PubMed:17288615, ECO:0000269|PubMed:20010624, ECO:0000269|PubMed:20711196, ECO:0000269|PubMed…	sp|O00625|PIR_HUMAN	sp|O00625|PIR_HUMAN Pirin OS=Homo sapiens OX=9606 GN=PIR PE=1 SV=1	1	3	3	3	15.5	32.113	139140	72009	1.93226
Q8IY57	YY1-associated factor 2	YAF2	FUNCTION: Binds to MYC and inhibits MYC-mediated transactivation. Also binds to MYCN and enhances MYCN-dependent transcriptional activation. Increases calpain 2-mediated proteolysis of YY1 in vitro. Component of the E2F6.com-1 complex, a repressive complex that methylates 'Lys-9' of histone H3, suggesting that it is involved in chromatin-remodeling. {ECO:0000269|PubMed:11593398, ECO:0000269|PubMe…	sp|Q8IY57|YAF2_HUMAN	sp|Q8IY57|YAF2_HUMAN YY1-associated factor 2 OS=Homo sapiens OX=9606 GN=YAF2 PE=1 SV=3	1	2	2	2	22.8	19.901	208800	108080	1.9319
P31150	Rab GDP dissociation inhibitor alpha	GDI1	FUNCTION: Regulates the GDP/GTP exchange reaction of most Rab proteins by inhibiting the dissociation of GDP from them, and the subsequent binding of GTP to them. Promotes the dissociation of GDP-bound Rab proteins from the membrane and inhibits their activation. Promotes the dissociation of RAB1A, RAB3A, RAB5A and RAB10 from membranes. {ECO:0000269|PubMed:23815289}.	sp|P31150|GDIA_HUMAN	sp|P31150|GDIA_HUMAN Rab GDP dissociation inhibitor alpha OS=Homo sapiens OX=9606 GN=GDI1 PE=1 SV=2	1	18	13	13	45.4	50.582	7224800	3740000	1.93176
Q8WUB8	PHD finger protein 10	PHF10	FUNCTION: Involved in transcription activity regulation by chromatin remodeling. Belongs to the neural progenitors-specific chromatin remodeling complex (npBAF complex) and is required for the proliferation of neural progenitors. During neural development a switch from a stem/progenitor to a post-mitotic chromatin remodeling mechanism occurs as neurons exit the cell cycle and become committed to …	sp|Q8WUB8|PHF10_HUMAN	sp|Q8WUB8|PHF10_HUMAN PHD finger protein 10 OS=Homo sapiens OX=9606 GN=PHF10 PE=1 SV=3	1	4	4	4	9.2	56.05	293200	152150	1.92705
Q0VGL1	Ragulator complex protein LAMTOR4	LAMTOR4	FUNCTION: As part of the Ragulator complex it is involved in amino acid sensing and activation of mTORC1, a signaling complex promoting cell growth in response to growth factors, energy levels, and amino acids. Activated by amino acids through a mechanism involving the lysosomal V-ATPase, the Ragulator functions as a guanine nucleotide exchange factor activating the small GTPases Rag. Activated R…	sp|Q0VGL1|LTOR4_HUMAN	sp|Q0VGL1|LTOR4_HUMAN Ragulator complex protein LAMTOR4 OS=Homo sapiens OX=9606 GN=LAMTOR4 PE=1 SV=1	1	1	1	1	10.1	10.741	53446	27740	1.92668
O60518	Ran-binding protein 6	RANBP6	FUNCTION: May function in nuclear protein import as nuclear transport receptor.	sp|O60518|RNBP6_HUMAN	sp|O60518|RNBP6_HUMAN Ran-binding protein 6 OS=Homo sapiens OX=9606 GN=RANBP6 PE=1 SV=2	1	4	4	4	5.3	124.71	335830	174550	1.92398
Q9NZN5	Rho guanine nucleotide exchange factor 12	ARHGEF12	FUNCTION: May play a role in the regulation of RhoA GTPase by guanine nucleotide-binding alpha-12 (GNA12) and alpha-13 (GNA13). Acts as guanine nucleotide exchange factor (GEF) for RhoA GTPase and may act as GTPase-activating protein (GAP) for GNA12 and GNA13. {ECO:0000269|PubMed:11094164}.	sp|Q9NZN5|ARHGC_HUMAN	sp|Q9NZN5|ARHGC_HUMAN Rho guanine nucleotide exchange factor 12 OS=Homo sapiens OX=9606 GN=ARHGEF12 PE=1 SV=1	1	9	9	9	8.2	173.23	468990	243930	1.92264
Q53H12	Acylglycerol kinase, mitochondrial	AGK	FUNCTION: Lipid kinase that can phosphorylate both monoacylglycerol and diacylglycerol to form lysophosphatidic acid (LPA) and phosphatidic acid (PA), respectively (PubMed:15939762). Does not phosphorylate sphingosine (PubMed:15939762). Phosphorylates ceramide (By similarity). Phosphorylates 1,2-dioleoylglycerol more rapidly than 2,3-dioleoylglycerol (By similarity). Independently of its lipid ki…	sp|Q53H12|AGK_HUMAN	sp|Q53H12|AGK_HUMAN Acylglycerol kinase, mitochondrial OS=Homo sapiens OX=9606 GN=AGK PE=1 SV=2	1	13	13	13	41.9	47.137	6114000	3181600	1.92167
P21291	Cysteine and glycine-rich protein 1	CSRP1	FUNCTION: Could play a role in neuronal development.	sp|P21291|CSRP1_HUMAN	sp|P21291|CSRP1_HUMAN Cysteine and glycine-rich protein 1 OS=Homo sapiens OX=9606 GN=CSRP1 PE=1 SV=3	1	10	10	10	64.8	20.567	2799900	1459400	1.91853
Q8TAP8	Protein phosphatase 1 regulatory subunit 35	PPP1R35	FUNCTION: Inhibits PPP1CA phosphatase activity. {ECO:0000269|PubMed:19389623}.	sp|Q8TAP8|PPR35_HUMAN	sp|Q8TAP8|PPR35_HUMAN Protein phosphatase 1 regulatory subunit 35 OS=Homo sapiens OX=9606 GN=PPP1R35 PE=1 SV=1	1	2	2	2	13	27.953	29087	15163	1.91829
O60568	Multifunctional procollagen lysine hydroxylase and glycosyltransferase LH3	PLOD3	FUNCTION: Multifunctional enzyme that catalyzes a series of essential post-translational modifications on Lys residues in procollagen (PubMed:11956192, PubMed:12475640, PubMed:18298658, PubMed:30089812, PubMed:18834968). Plays a redundant role in catalyzing the formation of hydroxylysine residues in -Xaa-Lys-Gly- sequences in collagens (PubMed:9582318, PubMed:9724729, PubMed:11956192, PubMed:1247…	sp|O60568|PLOD3_HUMAN	sp|O60568|PLOD3_HUMAN Multifunctional procollagen lysine hydroxylase and glycosyltransferase LH3 OS=Homo sapiens OX=9606 GN=PLOD3 PE=1 SV=1	1	14	14	14	28	84.784	3576000	1865700	1.91671
Q8NEU8	DCC-interacting protein 13-beta	APPL2	FUNCTION: Multifunctional adapter protein that binds to various membrane receptors, nuclear factors and signaling proteins to regulate many processes, such as cell proliferation, immune response, endosomal trafficking and cell metabolism (PubMed:26583432, PubMed:15016378, PubMed:24879834). Regulates signaling pathway leading to cell proliferation through interaction with RAB5A and subunits of the…	sp|Q8NEU8|DP13B_HUMAN	sp|Q8NEU8|DP13B_HUMAN DCC-interacting protein 13-beta OS=Homo sapiens OX=9606 GN=APPL2 PE=1 SV=3	1	7	7	7	15.7	74.493	643650	336210	1.91443
Q16630	Cleavage and polyadenylation specificity factor subunit 6	CPSF6	FUNCTION: Component of the cleavage factor Im (CFIm) complex that functions as an activator of the pre-mRNA 3'-end cleavage and polyadenylation processing required for the maturation of pre-mRNA into functional mRNAs (PubMed:9659921, PubMed:8626397, PubMed:14690600, PubMed:29276085). CFIm contributes to the recruitment of multiprotein complexes on specific sequences on the pre-mRNA 3'-end, so cal…	sp|Q16630|CPSF6_HUMAN	sp|Q16630|CPSF6_HUMAN Cleavage and polyadenylation specificity factor subunit 6 OS=Homo sapiens OX=9606 GN=CPSF6 PE=1 SV=2	1	8	8	8	16.9	59.209	4336700	2265600	1.91415
Q14571	Inositol 1,4,5-trisphosphate receptor type 2	ITPR2	FUNCTION: Receptor for inositol 1,4,5-trisphosphate, a second messenger that mediates the release of intracellular calcium. This release is regulated by cAMP both dependently and independently of PKA (By similarity). {ECO:0000250|UniProtKB:Q9Z329}.	sp|Q14571|ITPR2_HUMAN	sp|Q14571|ITPR2_HUMAN Inositol 1,4,5-trisphosphate receptor type 2 OS=Homo sapiens OX=9606 GN=ITPR2 PE=1 SV=2	1	32	32	25	15.8	308.06	3435800	1798200	1.91069
P37108	Signal recognition particle 14 kDa protein	SRP14	FUNCTION: Signal-recognition-particle assembly has a crucial role in targeting secretory proteins to the rough endoplasmic reticulum membrane. SRP9 together with SRP14 and the Alu portion of the SRP RNA, constitutes the elongation arrest domain of SRP. The complex of SRP9 and SRP14 is required for SRP RNA binding.	sp|P37108|SRP14_HUMAN	sp|P37108|SRP14_HUMAN Signal recognition particle 14 kDa protein OS=Homo sapiens OX=9606 GN=SRP14 PE=1 SV=2	1	3	3	3	27.2	14.57	2006100	1050200	1.91021
P27816	Microtubule-associated protein 4	MAP4	FUNCTION: Non-neuronal microtubule-associated protein. Promotes microtubule assembly. {ECO:0000269|PubMed:10791892}.	sp|P27816|MAP4_HUMAN	sp|P27816|MAP4_HUMAN Microtubule-associated protein 4 OS=Homo sapiens OX=9606 GN=MAP4 PE=1 SV=3	1	20	20	20	25.9	121	5140900	2694900	1.90764
Q9H920	RING finger protein 121	RNF121		sp|Q9H920|RN121_HUMAN	sp|Q9H920|RN121_HUMAN RING finger protein 121 OS=Homo sapiens OX=9606 GN=RNF121 PE=1 SV=1	1	4	4	4	16.8	37.882	221300	116070	1.90661
O14939	Phospholipase D2	PLD2	FUNCTION: May have a role in signal-induced cytoskeletal regulation and/or endocytosis. {ECO:0000250}.	sp|O14939|PLD2_HUMAN	sp|O14939|PLD2_HUMAN Phospholipase D2 OS=Homo sapiens OX=9606 GN=PLD2 PE=1 SV=2	1	2	2	2	3	105.99	68758	36064	1.90656
Q8N6R0	eEF1A lysine and N-terminal methyltransferase	METTL13	FUNCTION: Dual methyltransferase that catalyzes methylation of elongation factor 1-alpha (EEF1A1 and EEF1A2) at two different positions, and is therefore involved in the regulation of mRNA translation (PubMed:30612740, PubMed:30143613). Via its C-terminus, methylates EEF1A1 and EEF1A2 at the N-terminal residue 'Gly-2' (PubMed:30143613). Via its N-terminus dimethylates EEF1A1 and EEF1A2 at residue…	sp|Q8N6R0|EFNMT_HUMAN	sp|Q8N6R0|EFNMT_HUMAN eEF1A lysine and N-terminal methyltransferase OS=Homo sapiens OX=9606 GN=METTL13 PE=1 SV=1	1	8	8	8	19	78.767	598890	314350	1.90517
Q9NSI2	Ribosome biogenesis protein SLX9 homolog	SLX9		sp|Q9NSI2|SLX9_HUMAN	sp|Q9NSI2|SLX9_HUMAN Ribosome biogenesis protein SLX9 homolog OS=Homo sapiens OX=9606 GN=SLX9 PE=1 SV=2	1	2	2	2	15.7	25.456	83775	43974	1.9051
P35080	Profilin-2	PFN2	FUNCTION: Binds to actin and affects the structure of the cytoskeleton. At high concentrations, profilin prevents the polymerization of actin, whereas it enhances it at low concentrations. By binding to PIP2, it inhibits the formation of IP3 and DG.	sp|P35080|PROF2_HUMAN	sp|P35080|PROF2_HUMAN Profilin-2 OS=Homo sapiens OX=9606 GN=PFN2 PE=1 SV=3	1	3	3	3	20.7	15.046	1482100	777970	1.90509
Q9BZE4	GTP-binding protein 4	GTPBP4	FUNCTION: Involved in the biogenesis of the 60S ribosomal subunit. {ECO:0000250}.	sp|Q9BZE4|GTPB4_HUMAN	sp|Q9BZE4|GTPB4_HUMAN GTP-binding protein 4 OS=Homo sapiens OX=9606 GN=GTPBP4 PE=1 SV=3	1	13	13	13	25.6	73.964	851610	447420	1.90338
Q14651	Plastin-1	PLS1	FUNCTION: Actin-bundling protein in the absence of calcium.	sp|Q14651|PLSI_HUMAN	sp|Q14651|PLSI_HUMAN Plastin-1 OS=Homo sapiens OX=9606 GN=PLS1 PE=1 SV=2	1	9	6	6	22.3	70.253	854190	448900	1.90285
P60604	Ubiquitin-conjugating enzyme E2 G2	UBE2G2	FUNCTION: Accepts ubiquitin from the E1 complex and catalyzes its covalent attachment to other proteins. In vitro catalyzes 'Lys-48'-linked polyubiquitination. Involved in endoplasmic reticulum-associated degradation (ERAD). {ECO:0000269|PubMed:20061386, ECO:0000269|PubMed:22607976}.	sp|P60604|UB2G2_HUMAN	sp|P60604|UB2G2_HUMAN Ubiquitin-conjugating enzyme E2 G2 OS=Homo sapiens OX=9606 GN=UBE2G2 PE=1 SV=1	1	4	4	4	31.5	18.566	793830	417250	1.90253
O43502	DNA repair protein RAD51 homolog 3	RAD51C	FUNCTION: Essential for the homologous recombination (HR) pathway of DNA repair. Involved in the homologous recombination repair (HRR) pathway of double-stranded DNA breaks arising during DNA replication or induced by DNA-damaging agents. Part of the RAD21 paralog protein complexes BCDX2 and CX3 which act at different stages of the BRCA1-BRCA2-dependent HR pathway. Upon DNA damage, BCDX2 seems to…	sp|O43502|RA51C_HUMAN	sp|O43502|RA51C_HUMAN DNA repair protein RAD51 homolog 3 OS=Homo sapiens OX=9606 GN=RAD51C PE=1 SV=1	1	4	4	4	18.4	42.189	198050	104180	1.90104
Q7L3S4	Zinc finger protein 771	ZNF771	FUNCTION: May be involved in transcriptional regulation.	sp|Q7L3S4|ZN771_HUMAN	sp|Q7L3S4|ZN771_HUMAN Zinc finger protein 771 OS=Homo sapiens OX=9606 GN=ZNF771 PE=1 SV=1	1	3	3	3	13.9	35.702	72885	38345	1.90077
Q9H4A5	Golgi phosphoprotein 3-like	GOLPH3L	FUNCTION: Phosphatidylinositol-4-phosphate-binding protein that may antagonize the action of GOLPH3 which is required for the process of vesicle budding at the Golgi and anterograde transport to the plasma membrane. {ECO:0000269|PubMed:23345592}.	sp|Q9H4A5|GLP3L_HUMAN	sp|Q9H4A5|GLP3L_HUMAN Golgi phosphoprotein 3-like OS=Homo sapiens OX=9606 GN=GOLPH3L PE=1 SV=1	1	5	4	4	21.8	32.767	214950	113150	1.89969
Q5VT66	Mitochondrial amidoxime-reducing component 1	MTARC1	FUNCTION: Catalyzes the reduction of N-oxygenated molecules, acting as a counterpart of cytochrome P450 and flavin-containing monooxygenases in metabolic cycles (PubMed:19053771, PubMed:21029045, PubMed:30397129). As a component of prodrug-converting system, reduces a multitude of N-hydroxylated prodrugs particularly amidoximes, leading to increased drug bioavailability (PubMed:19053771). May be …	sp|Q5VT66|MARC1_HUMAN	sp|Q5VT66|MARC1_HUMAN Mitochondrial amidoxime-reducing component 1 OS=Homo sapiens OX=9606 GN=MTARC1 PE=1 SV=1	1	5	4	4	18.7	37.499	221490	116610	1.89941
O75934	Pre-mRNA-splicing factor SPF27	BCAS2	FUNCTION: Required for pre-mRNA splicing as component of the activated spliceosome (PubMed:28502770, PubMed:28076346, PubMed:29360106, PubMed:29301961, PubMed:30705154). Component of the PRP19-CDC5L complex that forms an integral part of the spliceosome and is required for activating pre-mRNA splicing. May have a scaffolding role in the spliceosome assembly as it contacts all other components of …	sp|O75934|SPF27_HUMAN	sp|O75934|SPF27_HUMAN Pre-mRNA-splicing factor SPF27 OS=Homo sapiens OX=9606 GN=BCAS2 PE=1 SV=1	1	10	10	10	55.6	26.131	2034400	1071700	1.89829
Q9Y5K5	Ubiquitin carboxyl-terminal hydrolase isozyme L5	UCHL5	FUNCTION: Protease that specifically cleaves 'Lys-48'-linked polyubiquitin chains. Deubiquitinating enzyme associated with the 19S regulatory subunit of the 26S proteasome. Putative regulatory component of the INO80 complex; however is inactive in the INO80 complex and is activated by a transient interaction of the INO80 complex with the proteasome via ADRM1. {ECO:0000269|PubMed:16906146, ECO:000…	sp|Q9Y5K5|UCHL5_HUMAN	sp|Q9Y5K5|UCHL5_HUMAN Ubiquitin carboxyl-terminal hydrolase isozyme L5 OS=Homo sapiens OX=9606 GN=UCHL5 PE=1 SV=3	1	7	7	7	28.9	37.606	1791300	943840	1.89789
P06737	Glycogen phosphorylase, liver form	PYGL	FUNCTION: Phosphorylase is an important allosteric enzyme in carbohydrate metabolism. Enzymes from different sources differ in their regulatory mechanisms and in their natural substrates. However, all known phosphorylases share catalytic and structural properties.	sp|P06737|PYGL_HUMAN	sp|P06737|PYGL_HUMAN Glycogen phosphorylase, liver form OS=Homo sapiens OX=9606 GN=PYGL PE=1 SV=4	1	19	18	17	28.8	97.147	3296000	1739400	1.89491
Q3ZAQ7	Vacuolar ATPase assembly integral membrane protein VMA21	VMA21	FUNCTION: Required for the assembly of the V0 complex of the vacuolar ATPase (V-ATPase) in the endoplasmic reticulum. {ECO:0000255|HAMAP-Rule:MF_03058, ECO:0000269|PubMed:19379691}.	sp|Q3ZAQ7|VMA21_HUMAN	sp|Q3ZAQ7|VMA21_HUMAN Vacuolar ATPase assembly integral membrane protein VMA21 OS=Homo sapiens OX=9606 GN=VMA21 PE=1 SV=1	1	2	2	2	24.8	11.354	219840	116100	1.89354
O75718	Cartilage-associated protein	CRTAP	FUNCTION: Necessary for efficient 3-hydroxylation of fibrillar collagen prolyl residues. {ECO:0000269|PubMed:17055431}.	sp|O75718|CRTAP_HUMAN	sp|O75718|CRTAP_HUMAN Cartilage-associated protein OS=Homo sapiens OX=9606 GN=CRTAP PE=1 SV=1	1	9	9	9	28.7	46.561	2732300	1443100	1.89335
Q13907	Isopentenyl-diphosphate Delta-isomerase 1	IDI1	FUNCTION: Catalyzes the 1,3-allylic rearrangement of the homoallylic substrate isopentenyl (IPP) to its highly electrophilic allylic isomer, dimethylallyl diphosphate (DMAPP). {ECO:0000269|PubMed:8806705}.	sp|Q13907|IDI1_HUMAN;sp|Q9BXS1|IDI2_HUMAN	sp|Q13907|IDI1_HUMAN Isopentenyl-diphosphate Delta-isomerase 1 OS=Homo sapiens OX=9606 GN=IDI1 PE=1 SV=2	2	6	6	6	33	26.319	2127400	1123800	1.89304
O60292	Signal-induced proliferation-associated 1-like protein 3	SIPA1L3	FUNCTION: Plays a critical role in epithelial cell morphogenesis, polarity, adhesion and cytoskeletal organization in the lens (PubMed:26231217). {ECO:0000269|PubMed:26231217}.	sp|O60292|SI1L3_HUMAN	sp|O60292|SI1L3_HUMAN Signal-induced proliferation-associated 1-like protein 3 OS=Homo sapiens OX=9606 GN=SIPA1L3 PE=1 SV=3	1	3	3	3	2.7	194.61	18080	9562.8	1.89066
Q92520	Protein FAM3C	FAM3C	FUNCTION: May be involved in retinal laminar formation. Promotes epithelial to mesenchymal transition.	sp|Q92520|FAM3C_HUMAN	sp|Q92520|FAM3C_HUMAN Protein FAM3C OS=Homo sapiens OX=9606 GN=FAM3C PE=1 SV=1	1	5	5	5	30.4	24.68	1118500	592270	1.8885
P11137	Microtubule-associated protein 2	MAP2	FUNCTION: The exact function of MAP2 is unknown but MAPs may stabilize the microtubules against depolymerization. They also seem to have a stiffening effect on microtubules.	sp|P11137|MTAP2_HUMAN	sp|P11137|MTAP2_HUMAN Microtubule-associated protein 2 OS=Homo sapiens OX=9606 GN=MAP2 PE=1 SV=4	1	8	8	8	6.8	199.52	2142200	1134600	1.88807
P10746	Uroporphyrinogen-III synthase	UROS	FUNCTION: Catalyzes cyclization of the linear tetrapyrrole, hydroxymethylbilane, to the macrocyclic uroporphyrinogen III, the branch point for the various sub-pathways leading to the wide diversity of porphyrins. Porphyrins act as cofactors for a multitude of enzymes that perform a variety of processes within the cell such as methionine synthesis (vitamin B12) or oxygen transport (heme).	sp|P10746|HEM4_HUMAN	sp|P10746|HEM4_HUMAN Uroporphyrinogen-III synthase OS=Homo sapiens OX=9606 GN=UROS PE=1 SV=1	1	1	1	1	5.7	28.627	59444	31521	1.88585
O15417	Trinucleotide repeat-containing gene 18 protein	TNRC18		sp|O15417|TNC18_HUMAN	sp|O15417|TNC18_HUMAN Trinucleotide repeat-containing gene 18 protein OS=Homo sapiens OX=9606 GN=TNRC18 PE=1 SV=3	1	1	1	1	0.6	314.52	28521	15137	1.88419
Q9NZM4	BRD4-interacting chromatin-remodeling complex-associated protein	BICRA	FUNCTION: Component of SWI/SNF chromatin remodeling subcomplex GBAF that carries out key enzymatic activities, changing chromatin structure by altering DNA-histone contacts within a nucleosome in an ATP-dependent manner (PubMed:29374058). May play a role in BRD4-mediated gene transcription (PubMed:21555454). {ECO:0000269|PubMed:21555454, ECO:0000269|PubMed:29374058}.	sp|Q9NZM4|BICRA_HUMAN	sp|Q9NZM4|BICRA_HUMAN BRD4-interacting chromatin-remodeling complex-associated protein OS=Homo sapiens OX=9606 GN=BICRA PE=1 SV=2	1	1	1	1	1	158.49	65989	35044	1.88303
Q02413	Desmoglein-1	DSG1	FUNCTION: Component of intercellular desmosome junctions. Involved in the interaction of plaque proteins and intermediate filaments mediating cell-cell adhesion.	sp|Q02413|DSG1_HUMAN	sp|Q02413|DSG1_HUMAN Desmoglein-1 OS=Homo sapiens OX=9606 GN=DSG1 PE=1 SV=2	1	19	19	19	26.5	113.75	708590	376420	1.88245
Q14849	StAR-related lipid transfer protein 3	STARD3	FUNCTION: Sterol-binding protein that mediates cholesterol transport from the endoplasmic reticulum to endosomes (PubMed:11053434, PubMed:15930133, PubMed:22514632, PubMed:28377464). Creates contact site between the endoplasmic reticulum and late endosomes: localizes to late endosome membranes and contacts the endoplasmic reticulum via interaction with VAPA and VAPB (PubMed:24105263, PubMed:28377…	sp|Q14849|STAR3_HUMAN	sp|Q14849|STAR3_HUMAN StAR-related lipid transfer protein 3 OS=Homo sapiens OX=9606 GN=STARD3 PE=1 SV=2	1	2	2	2	7.9	50.501	152140	80831	1.8822
Q9BWF3	RNA-binding protein 4	RBM4	FUNCTION: RNA-binding factor involved in multiple aspects of cellular processes like alternative splicing of pre-mRNA and translation regulation. Modulates alternative 5'-splice site and exon selection. Acts as a muscle cell differentiation-promoting factor. Activates exon skipping of the PTB pre-mRNA during muscle cell differentiation. Antagonizes the activity of the splicing factor PTBP1 to mod…	sp|Q9BWF3|RBM4_HUMAN	sp|Q9BWF3|RBM4_HUMAN RNA-binding protein 4 OS=Homo sapiens OX=9606 GN=RBM4 PE=1 SV=1	1	14	14	4	48.6	40.313	5875800	3122700	1.88164
Q9HC38	Glyoxalase domain-containing protein 4	GLOD4		sp|Q9HC38|GLOD4_HUMAN	sp|Q9HC38|GLOD4_HUMAN Glyoxalase domain-containing protein 4 OS=Homo sapiens OX=9606 GN=GLOD4 PE=1 SV=1	1	10	10	10	41.9	34.793	4319200	2297900	1.87963
Q96FH0	BLOC-1-related complex subunit 8	BORCS8	FUNCTION: As part of the BORC complex may play a role in lysosomes movement and localization at the cell periphery. Associated with the cytosolic face of lysosomes, the BORC complex may recruit ARL8B and couple lysosomes to microtubule plus-end-directed kinesin motor. {ECO:0000305|PubMed:25898167}.	sp|Q96FH0|BORC8_HUMAN	sp|Q96FH0|BORC8_HUMAN BLOC-1-related complex subunit 8 OS=Homo sapiens OX=9606 GN=BORCS8 PE=1 SV=1	1	1	1	1	16.8	13.403	115150	61278	1.87914
P49711	Transcriptional repressor CTCF	CTCF	FUNCTION: Chromatin binding factor that binds to DNA sequence specific sites. Involved in transcriptional regulation by binding to chromatin insulators and preventing interaction between promoter and nearby enhancers and silencers. Acts as transcriptional repressor binding to promoters of vertebrate MYC gene and BAG1 gene. Also binds to the PLK and PIM1 promoters. Acts as a transcriptional activa…	sp|P49711|CTCF_HUMAN	sp|P49711|CTCF_HUMAN Transcriptional repressor CTCF OS=Homo sapiens OX=9606 GN=CTCF PE=1 SV=1	1	7	7	7	11.7	82.785	266020	141640	1.87814
P16402	Histone H1.3	H1-3	FUNCTION: Histone H1 protein binds to linker DNA between nucleosomes forming the macromolecular structure known as the chromatin fiber. Histones H1 are necessary for the condensation of nucleosome chains into higher-order structured fibers. Acts also as a regulator of individual gene transcription through chromatin remodeling, nucleosome spacing and DNA methylation (By similarity). {ECO:0000250}.	sp|P16402|H13_HUMAN	sp|P16402|H13_HUMAN Histone H1.3 OS=Homo sapiens OX=9606 GN=H1-3 PE=1 SV=2	1	6	1	1	20.4	22.35	225820	120250	1.87792
Q99967	Cbp/p300-interacting transactivator 2	CITED2	FUNCTION: Transcriptional coactivator of the p300/CBP-mediated transcription complex. Acts as a bridge, linking TFAP2 transcription factors and the p300/CBP transcriptional coactivator complex in order to stimulate TFAP2-mediated transcriptional activation. Positively regulates TGF-beta signaling through its association with the SMAD/p300/CBP-mediated transcriptional coactivator complex. Stimulat…	sp|Q99967|CITE2_HUMAN	sp|Q99967|CITE2_HUMAN Cbp/p300-interacting transactivator 2 OS=Homo sapiens OX=9606 GN=CITED2 PE=1 SV=2	1	1	1	1	4.1	28.496	38365	20436	1.87732
Q9GZR1	Sentrin-specific protease 6	SENP6	FUNCTION: Protease that deconjugates SUMO1, SUMO2 and SUMO3 from targeted proteins. Processes preferentially poly-SUMO2 and poly-SUMO3 chains, but does not efficiently process SUMO1, SUMO2 and SUMO3 precursors. Deconjugates SUMO1 from RXRA, leading to transcriptional activation. Involved in chromosome alignment and spindle assembly, by regulating the kinetochore CENPH-CENPI-CENPK complex. Desumoy…	sp|Q9GZR1|SENP6_HUMAN	sp|Q9GZR1|SENP6_HUMAN Sentrin-specific protease 6 OS=Homo sapiens OX=9606 GN=SENP6 PE=1 SV=2	1	2	2	2	2.8	126.14	60396	32172	1.87728
Q9UP83	Conserved oligomeric Golgi complex subunit 5	COG5	FUNCTION: Required for normal Golgi function. {ECO:0000250}.	sp|Q9UP83|COG5_HUMAN	sp|Q9UP83|COG5_HUMAN Conserved oligomeric Golgi complex subunit 5 OS=Homo sapiens OX=9606 GN=COG5 PE=1 SV=3	1	6	6	6	9.5	92.742	947310	504810	1.87657
O43156	TELO2-interacting protein 1 homolog	TTI1	FUNCTION: Regulator of the DNA damage response (DDR). Part of the TTT complex that is required to stabilize protein levels of the phosphatidylinositol 3-kinase-related protein kinase (PIKK) family proteins. The TTT complex is involved in the cellular resistance to DNA damage stresses, like ionizing radiation (IR), ultraviolet (UV) and mitomycin C (MMC). Together with the TTT complex and HSP90 may…	sp|O43156|TTI1_HUMAN	sp|O43156|TTI1_HUMAN TELO2-interacting protein 1 homolog OS=Homo sapiens OX=9606 GN=TTI1 PE=1 SV=3	1	3	3	3	4	122.07	160230	85389	1.87647
Q6P9B9	Integrator complex subunit 5	INTS5	FUNCTION: Component of the Integrator (INT) complex, a complex involved in the small nuclear RNAs (snRNA) U1 and U2 transcription and in their 3'-box-dependent processing. The Integrator complex is associated with the C-terminal domain (CTD) of RNA polymerase II largest subunit (POLR2A) and is recruited to the U1 and U2 snRNAs genes (Probable). Mediates recruitment of cytoplasmic dynein to the nu…	sp|Q6P9B9|INT5_HUMAN	sp|Q6P9B9|INT5_HUMAN Integrator complex subunit 5 OS=Homo sapiens OX=9606 GN=INTS5 PE=1 SV=1	1	2	2	2	2.7	107.99	165330	88136	1.87585
Q96SQ9	Cytochrome P450 2S1	CYP2S1	FUNCTION: A cytochrome P450 monooxygenase involved in the metabolism of retinoids and eicosanoids (PubMed:12711469, PubMed:21068195). In epidermis, may contribute to the oxidative metabolism of all-trans-retinoic acid. For this activity, uses molecular oxygen inserting one oxygen atom into a substrate, and reducing the second into a water molecule, with two electrons provided by NADPH via cytochr…	sp|Q96SQ9|CP2S1_HUMAN	sp|Q96SQ9|CP2S1_HUMAN Cytochrome P450 2S1 OS=Homo sapiens OX=9606 GN=CYP2S1 PE=1 SV=2	1	4	4	4	11.7	55.816	266510	142100	1.87551
Q13615	Myotubularin-related protein 3	MTMR3	FUNCTION: Phosphatase that acts on lipids with a phosphoinositol headgroup. Has phosphatase activity towards phosphatidylinositol 3-phosphate and phosphatidylinositol 3,5-bisphosphate. May also dephosphorylate proteins phosphorylated on Ser, Thr, and Tyr residues (PubMed:10733931). {ECO:0000269|PubMed:10733931, ECO:0000269|PubMed:11676921}.	sp|Q13615|MTMR3_HUMAN	sp|Q13615|MTMR3_HUMAN Myotubularin-related protein 3 OS=Homo sapiens OX=9606 GN=MTMR3 PE=1 SV=3	1	1	1	1	1.1	133.62	46676	24926	1.87258
Q02880	DNA topoisomerase 2-beta	TOP2B	FUNCTION: Control of topological states of DNA by transient breakage and subsequent rejoining of DNA strands. Topoisomerase II makes double-strand breaks. {ECO:0000269|PubMed:10684600}.	sp|Q02880|TOP2B_HUMAN	sp|Q02880|TOP2B_HUMAN DNA topoisomerase 2-beta OS=Homo sapiens OX=9606 GN=TOP2B PE=1 SV=3	1	24	14	14	16.5	183.26	1244200	665210	1.87039
Q9UBL3	Set1/Ash2 histone methyltransferase complex subunit ASH2	ASH2L	FUNCTION: Transcriptional regulator (PubMed:12670868). Component or associated component of some histone methyltransferase complexes which regulates transcription through recruitment of those complexes to gene promoters (PubMed:19131338). Component of the Set1/Ash2 histone methyltransferase (HMT) complex, a complex that specifically methylates 'Lys-4' of histone H3, but not if the neighboring 'Ly…	sp|Q9UBL3|ASH2L_HUMAN	sp|Q9UBL3|ASH2L_HUMAN Set1/Ash2 histone methyltransferase complex subunit ASH2 OS=Homo sapiens OX=9606 GN=ASH2L PE=1 SV=1	1	7	7	7	19.6	68.722	880180	470650	1.87014
Q6AI08	HEAT repeat-containing protein 6	HEATR6	FUNCTION: Amplification-dependent oncogene.	sp|Q6AI08|HEAT6_HUMAN	sp|Q6AI08|HEAT6_HUMAN HEAT repeat-containing protein 6 OS=Homo sapiens OX=9606 GN=HEATR6 PE=1 SV=1	1	3	3	3	4.8	128.78	101370	54226	1.8694
Q08170	Serine/arginine-rich splicing factor 4	SRSF4	FUNCTION: Plays a role in alternative splice site selection during pre-mRNA splicing. Represses the splicing of MAPT/Tau exon 10. {ECO:0000269|PubMed:15009664}.	sp|Q08170|SRSF4_HUMAN	sp|Q08170|SRSF4_HUMAN Serine/arginine-rich splicing factor 4 OS=Homo sapiens OX=9606 GN=SRSF4 PE=1 SV=2	1	13	13	8	25.1	56.678	4681700	2504800	1.86909
Q96CN9	GRIP and coiled-coil domain-containing protein 1	GCC1	FUNCTION: Probably involved in maintaining Golgi structure.	sp|Q96CN9|GCC1_HUMAN	sp|Q96CN9|GCC1_HUMAN GRIP and coiled-coil domain-containing protein 1 OS=Homo sapiens OX=9606 GN=GCC1 PE=1 SV=1	1	3	3	3	4.5	87.81	64318	34416	1.86884
P30419	Glycylpeptide N-tetradecanoyltransferase 1	NMT1	FUNCTION: Adds a myristoyl group to the N-terminal glycine residue of certain cellular and viral proteins. {ECO:0000269|PubMed:22865860, ECO:0000269|PubMed:25255805, ECO:0000269|PubMed:9353336, ECO:0000269|PubMed:9506952}.	sp|P30419|NMT1_HUMAN	sp|P30419|NMT1_HUMAN Glycylpeptide N-tetradecanoyltransferase 1 OS=Homo sapiens OX=9606 GN=NMT1 PE=1 SV=2	1	11	11	8	24.4	56.806	4892100	2618300	1.86843
Q9UM22	Mammalian ependymin-related protein 1	EPDR1	FUNCTION: Binds anionic lipids and gangliosides at acidic pH. {ECO:0000269|PubMed:30729188}.	sp|Q9UM22|EPDR1_HUMAN	sp|Q9UM22|EPDR1_HUMAN Mammalian ependymin-related protein 1 OS=Homo sapiens OX=9606 GN=EPDR1 PE=1 SV=2	1	3	3	3	13.8	25.437	452480	242330	1.86721
O75131	Copine-3	CPNE3	FUNCTION: Calcium-dependent phospholipid-binding protein that plays a role in ERBB2-mediated tumor cell migration in response to growth factor heregulin stimulation (PubMed:20010870). {ECO:0000269|PubMed:20010870}.	sp|O75131|CPNE3_HUMAN;sp|Q8IYJ1|CPNE9_HUMAN;sp|Q96A23|CPNE4_HUMAN;sp|O95741|CPNE6_HUMAN;sp|Q9HCH3|CPNE5_HUMAN;sp|Q9UBL6|CPNE7_HUMAN	sp|O75131|CPNE3_HUMAN Copine-3 OS=Homo sapiens OX=9606 GN=CPNE3 PE=1 SV=1	6	13	13	12	28.7	60.13	6819600	3655500	1.86557
Q6P1K8	General transcription factor IIH subunit 2-like protein	GTF2H2C_2	FUNCTION: Component of the core-TFIIH basal transcription factor involved in nucleotide excision repair (NER) of DNA and, when complexed to CAK, in RNA transcription by RNA polymerase II. {ECO:0000250}.	sp|Q6P1K8|T2H2L_HUMAN;sp|Q13888|TF2H2_HUMAN	sp|Q6P1K8|T2H2L_HUMAN General transcription factor IIH subunit 2-like protein OS=Homo sapiens OX=9606 GN=GTF2H2C_2 PE=1 SV=1;sp|Q13888|TF2H2_HUMAN General transcription factor IIH subunit 2 OS=Homo sapiens OX=9606 GN=GTF2H2 PE=1 SV=1	2	6	6	6	17.2	44.452	401930	215530	1.86484
Q9UHG0	Doublecortin domain-containing protein 2	DCDC2	FUNCTION: Protein that plays a role in the inhibition of canonical Wnt signaling pathway (PubMed:25557784). May be involved in neuronal migration during development of the cerebral neocortex (By similarity). Involved in the control of ciliogenesis and ciliary length (PubMed:25601850, PubMed:27319779). {ECO:0000250|UniProtKB:D3ZR10, ECO:0000269|PubMed:25557784, ECO:0000269|PubMed:25601850, ECO:000…	sp|Q9UHG0|DCDC2_HUMAN	sp|Q9UHG0|DCDC2_HUMAN Doublecortin domain-containing protein 2 OS=Homo sapiens OX=9606 GN=DCDC2 PE=1 SV=2	1	3	3	3	9.5	52.833	65722	35271	1.86334
P04899	Guanine nucleotide-binding protein G(i) subunit alpha-2	GNAI2	FUNCTION: Guanine nucleotide-binding proteins (G proteins) are involved as modulators or transducers in various transmembrane signaling systems. The G(i) proteins are involved in hormonal regulation of adenylate cyclase: they inhibit the cyclase in response to beta-adrenergic stimuli. May play a role in cell division. {ECO:0000269|PubMed:17635935}.; FUNCTION: [Isoform sGi2]: Regulates the cell su…	sp|P04899|GNAI2_HUMAN;sp|P11488|GNAT1_HUMAN;sp|P19087|GNAT2_HUMAN;sp|A8MTJ3|GNAT3_HUMAN	sp|P04899|GNAI2_HUMAN Guanine nucleotide-binding protein G(i) subunit alpha-2 OS=Homo sapiens OX=9606 GN=GNAI2 PE=1 SV=3	4	14	14	8	47.6	40.45	8091100	4343100	1.86298
Q7Z6E9	E3 ubiquitin-protein ligase RBBP6	RBBP6	FUNCTION: E3 ubiquitin-protein ligase which promotes ubiquitination of YBX1, leading to its degradation by the proteasome (PubMed:18851979). May play a role as a scaffold protein to promote the assembly of the p53/TP53-MDM2 complex, resulting in increase of MDM2-mediated ubiquitination and degradation of p53/TP53; may function as negative regulator of p53/TP53, leading to both apoptosis and cell …	sp|Q7Z6E9|RBBP6_HUMAN	sp|Q7Z6E9|RBBP6_HUMAN E3 ubiquitin-protein ligase RBBP6 OS=Homo sapiens OX=9606 GN=RBBP6 PE=1 SV=1	1	8	8	8	5.7	201.56	485190	260460	1.86282
P06756	Integrin alpha-V	ITGAV	FUNCTION: The alpha-V (ITGAV) integrins are receptors for vitronectin, cytotactin, fibronectin, fibrinogen, laminin, matrix metalloproteinase-2, osteopontin, osteomodulin, prothrombin, thrombospondin and vWF. They recognize the sequence R-G-D in a wide array of ligands. ITGAV:ITGB3 binds to fractalkine (CX3CL1) and may act as its coreceptor in CX3CR1-dependent fractalkine signaling (PubMed:231254…	sp|P06756|ITAV_HUMAN	sp|P06756|ITAV_HUMAN Integrin alpha-V OS=Homo sapiens OX=9606 GN=ITGAV PE=1 SV=2	1	21	21	21	26.3	116.04	3755500	2016200	1.86266
Q2TBE0	CWF19-like protein 2	CWF19L2		sp|Q2TBE0|C19L2_HUMAN	sp|Q2TBE0|C19L2_HUMAN CWF19-like protein 2 OS=Homo sapiens OX=9606 GN=CWF19L2 PE=1 SV=4	1	1	1	1	1.7	103.79	75871	40739	1.86237
P31323	cAMP-dependent protein kinase type II-beta regulatory subunit	PRKAR2B	FUNCTION: Regulatory subunit of the cAMP-dependent protein kinases involved in cAMP signaling in cells. Type II regulatory chains mediate membrane association by binding to anchoring proteins, including the MAP2 kinase.	sp|P31323|KAP3_HUMAN	sp|P31323|KAP3_HUMAN cAMP-dependent protein kinase type II-beta regulatory subunit OS=Homo sapiens OX=9606 GN=PRKAR2B PE=1 SV=3	1	6	3	3	18.9	46.302	502300	270020	1.86023
Q08554	Desmocollin-1	DSC1	FUNCTION: Component of intercellular desmosome junctions. Involved in the interaction of plaque proteins and intermediate filaments mediating cell-cell adhesion. May contribute to epidermal cell positioning (stratification) by mediating differential adhesiveness between cells that express different isoforms. Linked to the keratinization of epithelial tissues.	sp|Q08554|DSC1_HUMAN	sp|Q08554|DSC1_HUMAN Desmocollin-1 OS=Homo sapiens OX=9606 GN=DSC1 PE=1 SV=2	1	10	10	10	14.8	99.986	1077200	579350	1.85933
Q9UHB7	AF4/FMR2 family member 4	AFF4	FUNCTION: Key component of the super elongation complex (SEC), a complex required to increase the catalytic rate of RNA polymerase II transcription by suppressing transient pausing by the polymerase at multiple sites along the DNA. In the SEC complex, AFF4 acts as a central scaffold that recruits other factors through direct interactions with ELL proteins (ELL, ELL2 or ELL3) and the P-TEFb comple…	sp|Q9UHB7|AFF4_HUMAN	sp|Q9UHB7|AFF4_HUMAN AF4/FMR2 family member 4 OS=Homo sapiens OX=9606 GN=AFF4 PE=1 SV=1	1	10	10	10	13.8	127.46	506360	272810	1.85609
O43933	Peroxisomal ATPase PEX1	PEX1	FUNCTION: Required for stability of PEX5 and protein import into the peroxisome matrix. Anchored by PEX26 to peroxisome membranes, possibly to form heteromeric AAA ATPase complexes required for the import of proteins into peroxisomes.	sp|O43933|PEX1_HUMAN	sp|O43933|PEX1_HUMAN Peroxisomal ATPase PEX1 OS=Homo sapiens OX=9606 GN=PEX1 PE=1 SV=1	1	7	7	7	6.9	142.87	310620	167370	1.85589
Q8N5P1	Zinc finger CCCH domain-containing protein 8	ZC3H8	FUNCTION: Acts as a transcriptional repressor of the GATA3 promoter. Sequence-specific DNA-binding factor that binds to the 5'-AGGTCTC-3' sequence within the negative cis-acting element intronic regulatory region (IRR) of the GATA3 gene (By similarity). Component of the little elongation complex (LEC), a complex required to regulate small nuclear RNA (snRNA) gene transcription by RNA polymerase I…	sp|Q8N5P1|ZC3H8_HUMAN	sp|Q8N5P1|ZC3H8_HUMAN Zinc finger CCCH domain-containing protein 8 OS=Homo sapiens OX=9606 GN=ZC3H8 PE=1 SV=2	1	2	2	2	10.3	33.575	27877	15022	1.85574
P62266	40S ribosomal protein S23	RPS23	FUNCTION: Component of the ribosome, a large ribonucleoprotein complex responsible for the synthesis of proteins in the cell (PubMed:28257692, PubMed:23636399, PubMed:25957688, PubMed:25901680). The small ribosomal subunit (SSU) binds messenger RNAs (mRNAs) and translates the encoded message by selecting cognate aminoacyl-transfer RNA (tRNA) molecules. The large subunit (LSU) contains the ribosom…	sp|P62266|RS23_HUMAN	sp|P62266|RS23_HUMAN 40S ribosomal protein S23 OS=Homo sapiens OX=9606 GN=RPS23 PE=1 SV=3	1	5	5	5	29.4	15.807	4643600	2503700	1.8547
Q9Y5V3	Melanoma-associated antigen D1	MAGED1	FUNCTION: Involved in the apoptotic response after nerve growth factor (NGF) binding in neuronal cells. Inhibits cell cycle progression, and facilitates NGFR-mediated apoptosis. May act as a regulator of the function of DLX family members. May enhance ubiquitin ligase activity of RING-type zinc finger-containing E3 ubiquitin-protein ligases. Proposed to act through recruitment and/or stabilizatio…	sp|Q9Y5V3|MAGD1_HUMAN	sp|Q9Y5V3|MAGD1_HUMAN Melanoma-associated antigen D1 OS=Homo sapiens OX=9606 GN=MAGED1 PE=1 SV=3	1	2	2	2	4.6	86.16	183100	98734	1.85448
Q96SK2	Transmembrane protein 209	TMEM209		sp|Q96SK2|TM209_HUMAN	sp|Q96SK2|TM209_HUMAN Transmembrane protein 209 OS=Homo sapiens OX=9606 GN=TMEM209 PE=1 SV=2	1	4	4	4	11.9	62.921	124850	67389	1.85268
P09132	Signal recognition particle 19 kDa protein	SRP19	FUNCTION: Signal-recognition-particle assembly, binds directly to 7S RNA and mediates binding of the 54 kDa subunit of the SRP.	sp|P09132|SRP19_HUMAN	sp|P09132|SRP19_HUMAN Signal recognition particle 19 kDa protein OS=Homo sapiens OX=9606 GN=SRP19 PE=1 SV=3	1	6	6	6	38.2	16.156	2149700	1160500	1.85239
O75330	Hyaluronan mediated motility receptor	HMMR	FUNCTION: Receptor for hyaluronic acid (HA) (By similarity). Involved in cell motility (By similarity). When hyaluronan binds to HMMR, the phosphorylation of a number of proteins, including PTK2/FAK1 occurs. May also be involved in cellular transformation and metastasis formation, and in regulating extracellular-regulated kinase (ERK) activity. May act as a regulator of adipogenisis (By similarit…	sp|O75330|HMMR_HUMAN	sp|O75330|HMMR_HUMAN Hyaluronan mediated motility receptor OS=Homo sapiens OX=9606 GN=HMMR PE=1 SV=2	1	6	6	6	10.9	84.099	204140	110310	1.8506
Q9NXG2	THUMP domain-containing protein 1	THUMPD1	FUNCTION: Functions as a tRNA-binding adapter to mediate NAT10-dependent tRNA acetylation (PubMed:25653167). {ECO:0000269|PubMed:25653167}.	sp|Q9NXG2|THUM1_HUMAN	sp|Q9NXG2|THUM1_HUMAN THUMP domain-containing protein 1 OS=Homo sapiens OX=9606 GN=THUMPD1 PE=1 SV=2	1	8	8	8	27.2	39.315	467670	252990	1.84857
Q96RG2	PAS domain-containing serine/threonine-protein kinase	PASK	FUNCTION: Serine/threonine-protein kinase involved in energy homeostasis and protein translation. Phosphorylates EEF1A1, GYS1, PDX1 and RPS6. Probably plays a role under changing environmental conditions (oxygen, glucose, nutrition), rather than under standard conditions. Acts as a sensor involved in energy homeostasis: regulates glycogen synthase synthesis by mediating phosphorylation of GYS1, l…	sp|Q96RG2|PASK_HUMAN	sp|Q96RG2|PASK_HUMAN PAS domain-containing serine/threonine-protein kinase OS=Homo sapiens OX=9606 GN=PASK PE=1 SV=3	1	3	3	3	4.3	142.93	92954	50331	1.84685
Q9HB58	Sp110 nuclear body protein	SP110	FUNCTION: Transcription factor. May be a nuclear hormone receptor coactivator. Enhances transcription of genes with retinoic acid response elements (RARE).	sp|Q9HB58|SP110_HUMAN	sp|Q9HB58|SP110_HUMAN Sp110 nuclear body protein OS=Homo sapiens OX=9606 GN=SP110 PE=1 SV=5	1	3	3	3	5.4	78.395	31188	16925	1.84272
P61916	NPC intracellular cholesterol transporter 2	NPC2	FUNCTION: Intracellular cholesterol transporter which acts in concert with NPC1 and plays an important role in the egress of cholesterol from the lysosomal compartment (PubMed:17018531, PubMed:11125141, PubMed:18772377, PubMed:29580834, PubMed:15937921). Unesterified cholesterol that has been released from LDLs in the lumen of the late endosomes/lysosomes is transferred by NPC2 to the cholesterol…	sp|P61916|NPC2_HUMAN	sp|P61916|NPC2_HUMAN NPC intracellular cholesterol transporter 2 OS=Homo sapiens OX=9606 GN=NPC2 PE=1 SV=1	1	4	4	4	29.1	16.57	11609000	6300900	1.84244
A6NED2	RCC1 domain-containing protein 1	RCCD1	FUNCTION: Plays a role in transcriptional repression of satellite repeats, possibly by regulating H3K36 methylation levels in centromeric regions together with KDM8 (PubMed:24981860). Possibly together with KDM8, is involved in proper mitotic spindle organization and chromosome segregation (PubMed:24981860). Plays a role in regulating alpha-tubulin deacetylation and cytoskeletal microtubule stabi…	sp|A6NED2|RCCD1_HUMAN	sp|A6NED2|RCCD1_HUMAN RCC1 domain-containing protein 1 OS=Homo sapiens OX=9606 GN=RCCD1 PE=1 SV=1	1	4	4	4	16.2	40.078	283790	154110	1.84148
Q92633	Lysophosphatidic acid receptor 1	LPAR1	FUNCTION: Receptor for lysophosphatidic acid (LPA) (PubMed:9070858, PubMed:19306925, PubMed:25025571, PubMed:26091040). Plays a role in the reorganization of the actin cytoskeleton, cell migration, differentiation and proliferation, and thereby contributes to the responses to tissue damage and infectious agents. Activates downstream signaling cascades via the G(i)/G(o), G(12)/G(13), and G(q) fami…	sp|Q92633|LPAR1_HUMAN	sp|Q92633|LPAR1_HUMAN Lysophosphatidic acid receptor 1 OS=Homo sapiens OX=9606 GN=LPAR1 PE=1 SV=3	1	2	2	2	6.6	41.109	135290	73503	1.84061
O43157	Plexin-B1	PLXNB1	FUNCTION: Receptor for SEMA4D (PubMed:19843518, PubMed:20877282, PubMed:21912513). Plays a role in GABAergic synapse development (By similarity). Mediates SEMA4A- and SEMA4D-dependent inhibitory synapse development (By similarity). Plays a role in RHOA activation and subsequent changes of the actin cytoskeleton (PubMed:12196628, PubMed:15210733). Plays a role in axon guidance, invasive growth and…	sp|O43157|PLXB1_HUMAN	sp|O43157|PLXB1_HUMAN Plexin-B1 OS=Homo sapiens OX=9606 GN=PLXNB1 PE=1 SV=3	1	3	3	3	2.6	232.3	39757	21614	1.83941
Q9Y6D6	Brefeldin A-inhibited guanine nucleotide-exchange protein 1	ARFGEF1	FUNCTION: Promotes guanine-nucleotide exchange on ARF1 and ARF3. Promotes the activation of ARF1/ARF3 through replacement of GDP with GTP. Involved in vesicular trafficking. Required for the maintenance of Golgi structure; the function may be independent of its GEF activity. Required for the maturaion of integrin beta-1 in the Golgi. Involved in the establishment and persistence of cell polarity …	sp|Q9Y6D6|BIG1_HUMAN	sp|Q9Y6D6|BIG1_HUMAN Brefeldin A-inhibited guanine nucleotide-exchange protein 1 OS=Homo sapiens OX=9606 GN=ARFGEF1 PE=1 SV=2	1	12	12	9	9.2	208.76	1054400	573480	1.8386
Q8N488	RING1 and YY1-binding protein	RYBP	FUNCTION: Component of a Polycomb group (PcG) multiprotein PRC1-like complex, a complex class required to maintain the transcriptionally repressive state of many genes, including Hox genes, throughout development. PcG PRC1-like complex acts via chromatin remodeling and modification of histones; it mediates monoubiquitination of histone H2A 'Lys-119', rendering chromatin heritably changed in its e…	sp|Q8N488|RYBP_HUMAN	sp|Q8N488|RYBP_HUMAN RING1 and YY1-binding protein OS=Homo sapiens OX=9606 GN=RYBP PE=1 SV=2	1	4	4	4	30.3	24.821	275150	149750	1.8374
P50851	Lipopolysaccharide-responsive and beige-like anchor protein	LRBA	FUNCTION: May be involved in coupling signal transduction and vesicle trafficking to enable polarized secretion and/or membrane deposition of immune effector molecules. {ECO:0000250}.	sp|P50851|LRBA_HUMAN	sp|P50851|LRBA_HUMAN Lipopolysaccharide-responsive and beige-like anchor protein OS=Homo sapiens OX=9606 GN=LRBA PE=1 SV=4	1	25	25	24	13.1	319.1	2668300	1452500	1.83704
Q13547	Histone deacetylase 1	HDAC1	FUNCTION: Responsible for the deacetylation of lysine residues on the N-terminal part of the core histones (H2A, H2B, H3 and H4). Histone deacetylation gives a tag for epigenetic repression and plays an important role in transcriptional regulation, cell cycle progression and developmental events. Histone deacetylases act via the formation of large multiprotein complexes. Deacetylates SP proteins,…	sp|Q13547|HDAC1_HUMAN	sp|Q13547|HDAC1_HUMAN Histone deacetylase 1 OS=Homo sapiens OX=9606 GN=HDAC1 PE=1 SV=1	1	10	5	5	33.2	55.102	1138700	619870	1.837
Q86WW8	Cytochrome c oxidase assembly factor 5	COA5	FUNCTION: Involved in an early step of the mitochondrial complex IV assembly process. {ECO:0000269|PubMed:21457908}.	sp|Q86WW8|COA5_HUMAN	sp|Q86WW8|COA5_HUMAN Cytochrome c oxidase assembly factor 5 OS=Homo sapiens OX=9606 GN=COA5 PE=1 SV=1	1	2	2	2	44.6	8.3755	373200	203220	1.83643
Q5JTW2	Centrosomal protein of 78 kDa	CEP78	FUNCTION: May be required for efficient PLK4 centrosomal localization and PLK4-induced overduplication of centrioles (PubMed:27246242). May play a role in cilium biogenesis (PubMed:27588451). {ECO:0000269|PubMed:27246242, ECO:0000269|PubMed:27588451}.	sp|Q5JTW2|CEP78_HUMAN	sp|Q5JTW2|CEP78_HUMAN Centrosomal protein of 78 kDa OS=Homo sapiens OX=9606 GN=CEP78 PE=1 SV=1	1	3	3	3	6.4	76.396	75777	41283	1.83555
O43808	Peroxisomal membrane protein PMP34	SLC25A17	FUNCTION: Peroxisomal transporter for multiple cofactors like coenzyme A (CoA), flavin adenine dinucleotide (FAD), flavin mononucleotide (FMN) and nucleotide adenosine monophosphate (AMP), and to a lesser extent for nicotinamide adenine dinucleotide (NAD(+)), adenosine diphosphate (ADP) and adenosine 3',5'-diphosphate (PAP). May catalyze the transport of free CoA, FAD and NAD(+) from the cytosol …	sp|O43808|PM34_HUMAN	sp|O43808|PM34_HUMAN Peroxisomal membrane protein PMP34 OS=Homo sapiens OX=9606 GN=SLC25A17 PE=1 SV=1	1	1	1	1	2.9	34.566	49897	27187	1.83533
Q9UKG1	DCC-interacting protein 13-alpha	APPL1	FUNCTION: Multifunctional adapter protein that binds to various membrane receptors, nuclear factors and signaling proteins to regulate many processes, such as cell proliferation, immune response, endosomal trafficking and cell metabolism (PubMed:26583432, PubMed:15016378, PubMed:26073777, PubMed:19661063, PubMed:10490823). Regulates signaling pathway leading to cell proliferation through interact…	sp|Q9UKG1|DP13A_HUMAN	sp|Q9UKG1|DP13A_HUMAN DCC-interacting protein 13-alpha OS=Homo sapiens OX=9606 GN=APPL1 PE=1 SV=1	1	12	12	12	28.9	79.663	1477700	805850	1.83372
P05204	Non-histone chromosomal protein HMG-17	HMGN2	FUNCTION: Binds to the inner side of the nucleosomal DNA thus altering the interaction between the DNA and the histone octamer. May be involved in the process which maintains transcribable genes in a unique chromatin conformation (By similarity). {ECO:0000250}.	sp|P05204|HMGN2_HUMAN	sp|P05204|HMGN2_HUMAN Non-histone chromosomal protein HMG-17 OS=Homo sapiens OX=9606 GN=HMGN2 PE=1 SV=3	1	2	1	1	23.3	9.3926	864540	472340	1.83033
Q96T60	Bifunctional polynucleotide phosphatase/kinase	PNKP	FUNCTION: Plays a key role in the repair of DNA damage, functioning as part of both the non-homologous end-joining (NHEJ) and base excision repair (BER) pathways. Through its two catalytic activities, PNK ensures that DNA termini are compatible with extension and ligation by either removing 3'-phosphates from, or by phosphorylating 5'-hydroxyl groups on, the ribose sugar of the DNA backbone. {ECO…	sp|Q96T60|PNKP_HUMAN	sp|Q96T60|PNKP_HUMAN Bifunctional polynucleotide phosphatase/kinase OS=Homo sapiens OX=9606 GN=PNKP PE=1 SV=1	1	6	6	6	15.4	57.076	528330	288670	1.83022
A1XBS5	CBY1-interacting BAR domain-containing protein 1	CIBAR1	FUNCTION: Acts as a positive regulator of ciliary hedgehog signaling (By similarity). Probable regulator of ciliogenesis involved in limb morphogenesis. In cooperation with CBY1 it is involved in the recruitment and fusion of endosomal vesicles at distal appendages during early stages of ciliogenesis. {ECO:0000250|UniProtKB:Q8BP22, ECO:0000269|PubMed:27528616, ECO:0000269|PubMed:30395363}.	sp|A1XBS5|CBAR1_HUMAN	sp|A1XBS5|CBAR1_HUMAN CBY1-interacting BAR domain-containing protein 1 OS=Homo sapiens OX=9606 GN=CIBAR1 PE=1 SV=2	1	2	2	2	8	33.43	102630	56092	1.82967
Q9BZ67	FERM domain-containing protein 8	FRMD8	FUNCTION: Promotes the cell surface stability of iRhom1/RHBDF1 and iRhom2/RHBDF2 and prevents their degradation via the endolysosomal pathway. By acting on iRhoms, involved in ADAM17-mediated shedding of TNF, amphiregulin/AREG, HBEGF and TGFA from the cell surface (PubMed:29897333, PubMed:29897336). Negatively regulates Wnt signaling, possibly by antagonizing the recruitment of AXIN1 to LRP6 (Pub…	sp|Q9BZ67|FRMD8_HUMAN;sp|Q9BZ68|FR8P1_HUMAN	sp|Q9BZ67|FRMD8_HUMAN FERM domain-containing protein 8 OS=Homo sapiens OX=9606 GN=FRMD8 PE=1 SV=1;sp|Q9BZ68|FR8P1_HUMAN Putative FERM domain-containing protein FRMD8P1 OS=Homo sapiens OX=9606 GN=FRMD8P1 PE=5 SV=2	2	2	2	2	5.6	51.217	76719	41941	1.82921
Q8N1B4	Vacuolar protein sorting-associated protein 52 homolog	VPS52	FUNCTION: Acts as component of the GARP complex that is involved in retrograde transport from early and late endosomes to the trans-Golgi network (TGN). The GARP complex is required for the maintenance of the cycling of mannose 6-phosphate receptors between the TGN and endosomes, this cycling is necessary for proper lysosomal sorting of acid hydrolases such as CTSD (PubMed:15878329, PubMed:183675…	sp|Q8N1B4|VPS52_HUMAN	sp|Q8N1B4|VPS52_HUMAN Vacuolar protein sorting-associated protein 52 homolog OS=Homo sapiens OX=9606 GN=VPS52 PE=1 SV=1	1	8	8	8	16.6	82.22	843430	461460	1.82774
Q0VDF9	Heat shock 70 kDa protein 14	HSPA14	FUNCTION: Component of the ribosome-associated complex (RAC), a complex involved in folding or maintaining nascent polypeptides in a folding-competent state. In the RAC complex, binds to the nascent polypeptide chain, while DNAJC2 stimulates its ATPase activity. {ECO:0000269|PubMed:16002468}.	sp|Q0VDF9|HSP7E_HUMAN	sp|Q0VDF9|HSP7E_HUMAN Heat shock 70 kDa protein 14 OS=Homo sapiens OX=9606 GN=HSPA14 PE=1 SV=1	1	13	13	13	41.3	54.794	1432600	784580	1.82595
[truncated: 5,350 more rows]

## Sheet: DeTFs in Cyto 
Differential transcription associated proteins in cytoplasmic components
Protein	Protein Name	Gene Name	Function	ProteinGroup	FastaHeaders	Proteins	Peptides	RazorUniquePeptides	UniquePeptides	Coverage	MolWeight	LFQ intensity OX40L_Cyto	LFQ intensity PBS_Cyto	Cyto_OX40L/Cyto_PBS
[truncated: 134 more rows]

## Sheet: OX40L vs. PBS Nuc
Protein	Protein Name	Gene Name	Function	ProteinGroup	FastaHeaders	Proteins	Peptides	RazorUniquePeptides	UniquePeptides	Coverage	MolWeight	LFQ intensity OX40L_Nuc	LFQ intensity PBS_Nuc	Nuc_OX40L/Nuc_PBS
[truncated: 2,923 more rows]

[truncated: 1 more sheets: DeTFs in Nuc]
