# Supplementary material for: Endothelial OX40 activation facilitates tumor cell escape from T cell surveillance through S1P/YAP-mediated angiogenesis
Source: J Clin Invest. 2025 Mar 3;135(5):e186291. doi: 10.1172/JCI186291 (PMC11870743; doi:10.1172/JCI186291)
Supplement: Supplemental table 3 [file jci-135-186291-s065.xlsx]

## Sheet: OX40L vs. PBS  YAP IP_MS
Supplementary Table S3. Differential metabolites that potentially interacted with YAP protein in HUVEC treated with PBS or OX40L recombinant protein
ID	Adduct	Name	m/z	rt(s)	SuperClass	Class	SubClass	PBS-1	PBS-2	PBS-3	Ave_PBS	OX40L-1	OX40L-2	OX40L-3	Ave_OX40L	Ave_OX40L/Ave_PBS
M240T444	[M+H]+	Sphingosine-1-phosphate	354.118	330.125	Alkaloids and derivatives	Benzophenanthridine alkaloids	Hexahydrobenzophenanthridine alkaloids	33137.6	7312.68	22003.9	20818.1	246080	251618	214265	237321	11.3998
M276T449	[M+H]+	Leupeptin	389.167	419.375	Organoheterocyclic compounds	Dihydrofurans	Furanones	26769.2	19544.4	16799.4	21037.7	145304	193753	155529	164862	7.83652
M148T438	[M+H]+	Glutamate	240.096	444.463	Organoheterocyclic compounds	Pteridines and derivatives	Pterins and derivatives	22289.4	29184.8	21125.5	24199.9	197113	140078	150987	162726	6.72424
M156T444	[M+H]+	Histidine	156.077	443.719	Organic acids and derivatives	Carboxylic acids and derivatives	Amino acids, peptides, and analogues	16799.4	7180.92	46511.3	23497.2	87294.7	137631	226356	150427	6.40192
M391T441	[M+Na]+	Curcumin	667.335	547.905	Organic acids and derivatives	Carboxylic acids and derivatives	Amino acids, peptides, and analogues	21279.2	21433	32083.6	24931.9	154368	153310	121205	142961	5.73405
M131T480	[M+H]+	Agmatine	276.156	448.6	Organic acids and derivatives	Carboxylic acids and derivatives	Amino acids, peptides, and analogues	27274.3	35772.8	10870.2	24639.1	162664	129749	87232.4	126549	5.13608
M252T188	[M+H]+	Deoxyadenosine	218.114	444.463	Organic acids and derivatives	Carboxylic acids and derivatives	Amino acids, peptides, and analogues	6983.28	51057	24507.4	27515.9	71864.1	173905	99427.6	115066	4.18179
M305T87_2	[M+Na]+	Artemisinin	251.166	572.933	Lipids and lipid-like molecules	Steroids and steroid derivatives	Androstane steroids	10804.3	17765.6	23519.2	17363	39758.6	112743	64024.4	72175.2	4.15683
M132T389	[M+H]+	Creatine	517.309	457.47	Organic acids and derivatives	Carboxylic acids and derivatives	Amino acids, peptides, and analogues	18600.1	37024.6	22245.5	25956.7	104571	100859	26215.4	77215	2.97476
M632T418	[M+NH4]+	Diatrizoic acid	196.097	45.8616	Organic acids and derivatives	Carboxylic acids and derivatives	Amino acids, peptides, and analogues	36453.6	18446.4	14361.8	23087.3	32043.3	58735.7	59606.8	50128.6	2.17126
M194T177	[M+H]+	5,6-dihydroxyindole-2-carboxylic acid	194.067	177.254	Organoheterocyclic compounds	Indoles and derivatives	Indolecarboxylic acids and derivatives	9758.69	2193.14	655631	222528	676594	298976	229768	401780	1.80553
M385T27_1	[M+NH4]+	Galanthamine hydrobromide	385.129	26.5178	Alkaloids and derivatives	Amaryllidaceae alkaloids	Galanthamine-type amaryllidaceae alkaloids	197.23	19288.6	389559	136348	147298	381267	149232	225932	1.65702
M336T429	[M+Na+2i]+	Bromobutide	336.088	429.359	Benzenoids	Benzene and substituted derivatives	Phenylpropanes	16527.5	8038.89	1.22713e+06	417233	665311	548623	500401	571445	1.36961
M206T253	[M+H-C5H12O2]+	Isopropalin	206.102	252.768	Benzenoids	Benzene and substituted derivatives	Aniline and substituted anilines	34924.6	20440.4	1.92128e+06	658881	126201	1.20559e+06	1.32553e+06	885775	1.34436
M628T147	[M+H]+	2-epahpa [dmed-fahfa]	627.534	146.748				8062.56	5624.86	538377	184021	139714	203233	324820	222589	1.20958
M309T54	[M+H-H2O]+	Neohesperidose	309.138	53.9216	Lipids and lipid-like molecules	Fatty Acyls	Fatty acyl glycosides	124670	14003	2.83484e+06	991171	910804	1.60188e+06	621776	1.04482e+06	1.05413
M360T420	[M+NH4]+	Trehalose	360.147	420.342	Organic oxygen compounds	Organooxygen compounds	Carbohydrates and carbohydrate conjugates	16882.5	2461.37	792166	270503	380458	213239	236382	276693	1.02288
M465T303	[2M+Na]+	N-acetylglucosamine	465.169	302.877	Organic oxygen compounds	Organooxygen compounds	Carbohydrates and carbohydrate conjugates	58354.9	6713.54	1.66936e+06	578143	90353	746049	741959	526121	0.910018
M120T331	[M+H]+	L-homoserine	120.081	330.632	Organic acids and derivatives	Carboxylic acids and derivatives	Amino acids, peptides, and analogues	322944	64169.1	7.02577e+06	2.47096e+06	4.40597e+06	1.4425e+06	776180	2.20822e+06	0.893668
M158T78	[M+H-NH3]+	L-theanine	158.081	77.6447	Organic acids and derivatives	Carboxylic acids and derivatives	Amino acids, peptides, and analogues	6090.31	4646.62	316838	109192	37520.2	128598	72426	79514.8	0.728213
M545T50	[M+Na]+	2-(hydroxymethyl)-6-[5-[3-(hydroxymethyl)-5-(3-hydroxypropyl)-7-methoxy-2,3-dihydro-1-benzofuran-2-yl]-2-methoxyphenoxy]oxane-3,4,5-triol	545.175	49.6931				1388.46	276.12	38884.9	13516.5	3416.46	14996.4	8086.27	8833.05	0.653502
M309T231	[M+H-C27H31O11N]+	Paclitaxel	309.127	230.968	Lipids and lipid-like molecules	Prenol lipids	Diterpenoids	19162.4	2587.59	1.13549e+06	385746	141431	165845	173953	160410	0.415843
M192T227	[M+H]+	Diethyltoluamide	192.138	226.622	Benzenoids	Benzene and substituted derivatives	Toluenes	117735	7123.77	5.12762e+06	1.75083e+06	661746	554537	718327	644870	0.368323
M288T213	[M+H]+	Tenofovir	288.105	213.173	Organoheterocyclic compounds	Imidazopyrimidines	Purines and purine derivatives	388407	10287.3	1.04834e+07	3.62737e+06	841678	1.36128e+06	1.65737e+06	1.28678e+06	0.354741
M104T50	[M+H-NH3]+	Benzamidine	104.07	50.166				2.41261e+06	53408.5	1.5705e+08	5.3172e+07	1.1523e+07	9.61916e+06	1.21525e+07	1.10982e+07	0.208723
M362T159	[M+H]+	Ofloxacin	362.151	159.261	Organoheterocyclic compounds	Quinolines and derivatives	Quinoline carboxylic acids	331172	9821.81	1.67913e+07	5.71076e+06	653459	1.57515e+06	1.09942e+06	1.10934e+06	0.194255
M112T258	[M+H]+	Cytosine	112.051	258.33	Organoheterocyclic compounds	Diazines	Pyrimidines and pyrimidine derivatives	686698	20464.1	4.52993e+07	1.53355e+07	1.3977e+06	1.52872e+06	1.79942e+06	1.57528e+06	0.102721
M250T260	[M+Na]+	2'-deoxycytidine	250.08	259.68	Nucleosides, nucleotides, and analogues	Pyrimidine nucleosides	Pyrimidine 2'-deoxyribonucleosides	39934.1	1719.8	3.72025e+06	1.25397e+06	127542	150672	42278.5	106831	0.0851943
M230T406	[M+H]+	Icaridin	230.186	405.548	Organoheterocyclic compounds	Piperidines	Piperidinecarboxylic acids and derivatives	171736	5033.18	1.30826e+07	4.4198e+06	328718	221230	370979	306976	0.0694548
M189T432_1	[M+H]+	Ne-acetyllysine	189.123	431.785	Organic acids and derivatives	Carboxylic acids and derivatives	Amino acids, peptides, and analogues	426235	5971.97	3.00254e+07	1.01525e+07	385370	407162	417000	403177	0.039712
M362T127	[M+H]+	Levofloxacin	362.151	127.009	Organoheterocyclic compounds	Quinolines and derivatives	Quinoline carboxylic acids	2.2058e+06	6532.09	1.0653e+08	3.62474e+07	254034	478506	356219	362919	0.0100123
