# Supplementary material for: Endothelial OX40 activation facilitates tumor cell escape from T cell surveillance through S1P/YAP-mediated angiogenesis
Source: J Clin Invest. 2025 Mar 3;135(5):e186291. doi: 10.1172/JCI186291 (PMC11870743; doi:10.1172/JCI186291)
Supplement: Supplemental table 4 [file jci-135-186291-s066.xls]

## Sheet: Sheet1
Supplementary Table S4. Differential metabolites in HUVEC identified by untargeted metabolomics analyses
Metabolites	PBS_1	PBS_2	PBS_3	OX40L_1	OX40L_2	OX40L_3
Biotin	5.768e+06	4.3655e+06	4.34207e+06	559450	500916	385320
Stearic acid	3.69626e+06	4.82005e+06	2.15075e+06	465761	558844	474576
S1P	2.3144e+06	3380492	3.46812e+06	396598	724561	335301
Theophylline	2785964	2.75556e+06	3031184	506651	569793	490009
Choline	3.16662e+06	3.20816e+06	1.87479e+06	462240	614569	708577
Phenylalanine	3.19596e+06	1.64388e+06	2469960	612947	964973	412871
Glyasperin C	2.18282e+06	1.24111e+06	1.25009e+06	352235	466784	625516
Linderane	1.53298e+06	1.31496e+06	2990002	431085	281545	1.25132e+06
Indole	940187	722907	1941628	204185	849477	723289
Gaultherin	770622	1645740	1.46578e+06	731488	617001	780481
Palmitic acid	422863	624905	751236	702768	1.05741e+06	852516
Tacrine	1.41535e+06	917990	1.38418e+06	1.35962e+06	3.93867e+06	2.67715e+06
Oleic acid	1.31633e+06	1127438	772388	294173	3.70821e+06	4.46271e+06
Oxymatrine	1.57403e+06	721925	1.22387e+06	5.24806e+06	3.35789e+06	5.22498e+06
Mephedrone	1.2935e+06	810415	582931	1.62417e+06	5.29842e+06	3.26023e+06
Ketoleucine	1.30962e+06	756964	594975	4.66714e+06	4.50549e+06	4.47576e+06
Harmine	565450	495355	768342	3.47692e+06	4.47208e+06	3.80356e+06
Folic acid	778471	757059	576599	5.72438e+06	3.7761e+06	3.69878e+06
Vanillic acid	346642	908015	471600	4.20036e+06	5.12294e+06	3.8258e+06
Cholic acid	400947	787668	690168	6.31897e+06	4.60357e+06	5.12636e+06
